# Supplementary material for: Targeted Mass Spectrometry Enables Quantification of Novel Pharmacodynamic Biomarkers of ATM Kinase Inhibition
Source: MDPI journal article supplement (doi:10.3390/cancers13153843), 2021-07-30
Supplement: s1 [file s1]

## **Antibody characterization supplemental information**

# Index

|                             |           |
|-----------------------------|-----------|
| A. Project Description..... | Page 3.   |
| B. Methods.....             | Page 6.   |
| C. Tables.....              | Page 11.  |
| D. Results.....             | Page 26.  |
| E. Summary.....             | Page 179. |
| F. References.....          | Page 183. |

## A. Project Description

A panel of 39 rabbit anti-human antibodies were characterized in the Antibody Characterization Laboratory (ACL) at the Frederick National Laboratory for Cancer Research facility in Frederick, Md. The testing strategy that was used in this characterization is depicted in Figure 1A and Figure 1B. Briefly, each antibody was first screened by immunoblot assay against commercial purified recombinant protein. Clones that were positive in this primary screen were subsequently tested for their ability to detect endogenous protein in three distinct human cell lines: HeLa, MCF10A, and LCL57 by immunoblot assay. These positive clones were further characterized in immunofluorescence (IF), single cell western blot (SCWB), and immunoprecipitation (IP) assays. Clones that were negative in the primary screen were evaluated for potential phospho-specificity. All 39 clones were also screened by immunohistochemistry. Clones that were positive in this screen were subsequently tested in 59 of the 60 cancer cell lines in the NCI-60 protein array. This report describes the methods that were used to characterize the antibodies and summarizes the results that were obtained for each test as positive, negative, weak, uncertain, not tested, or to be determined accordingly.

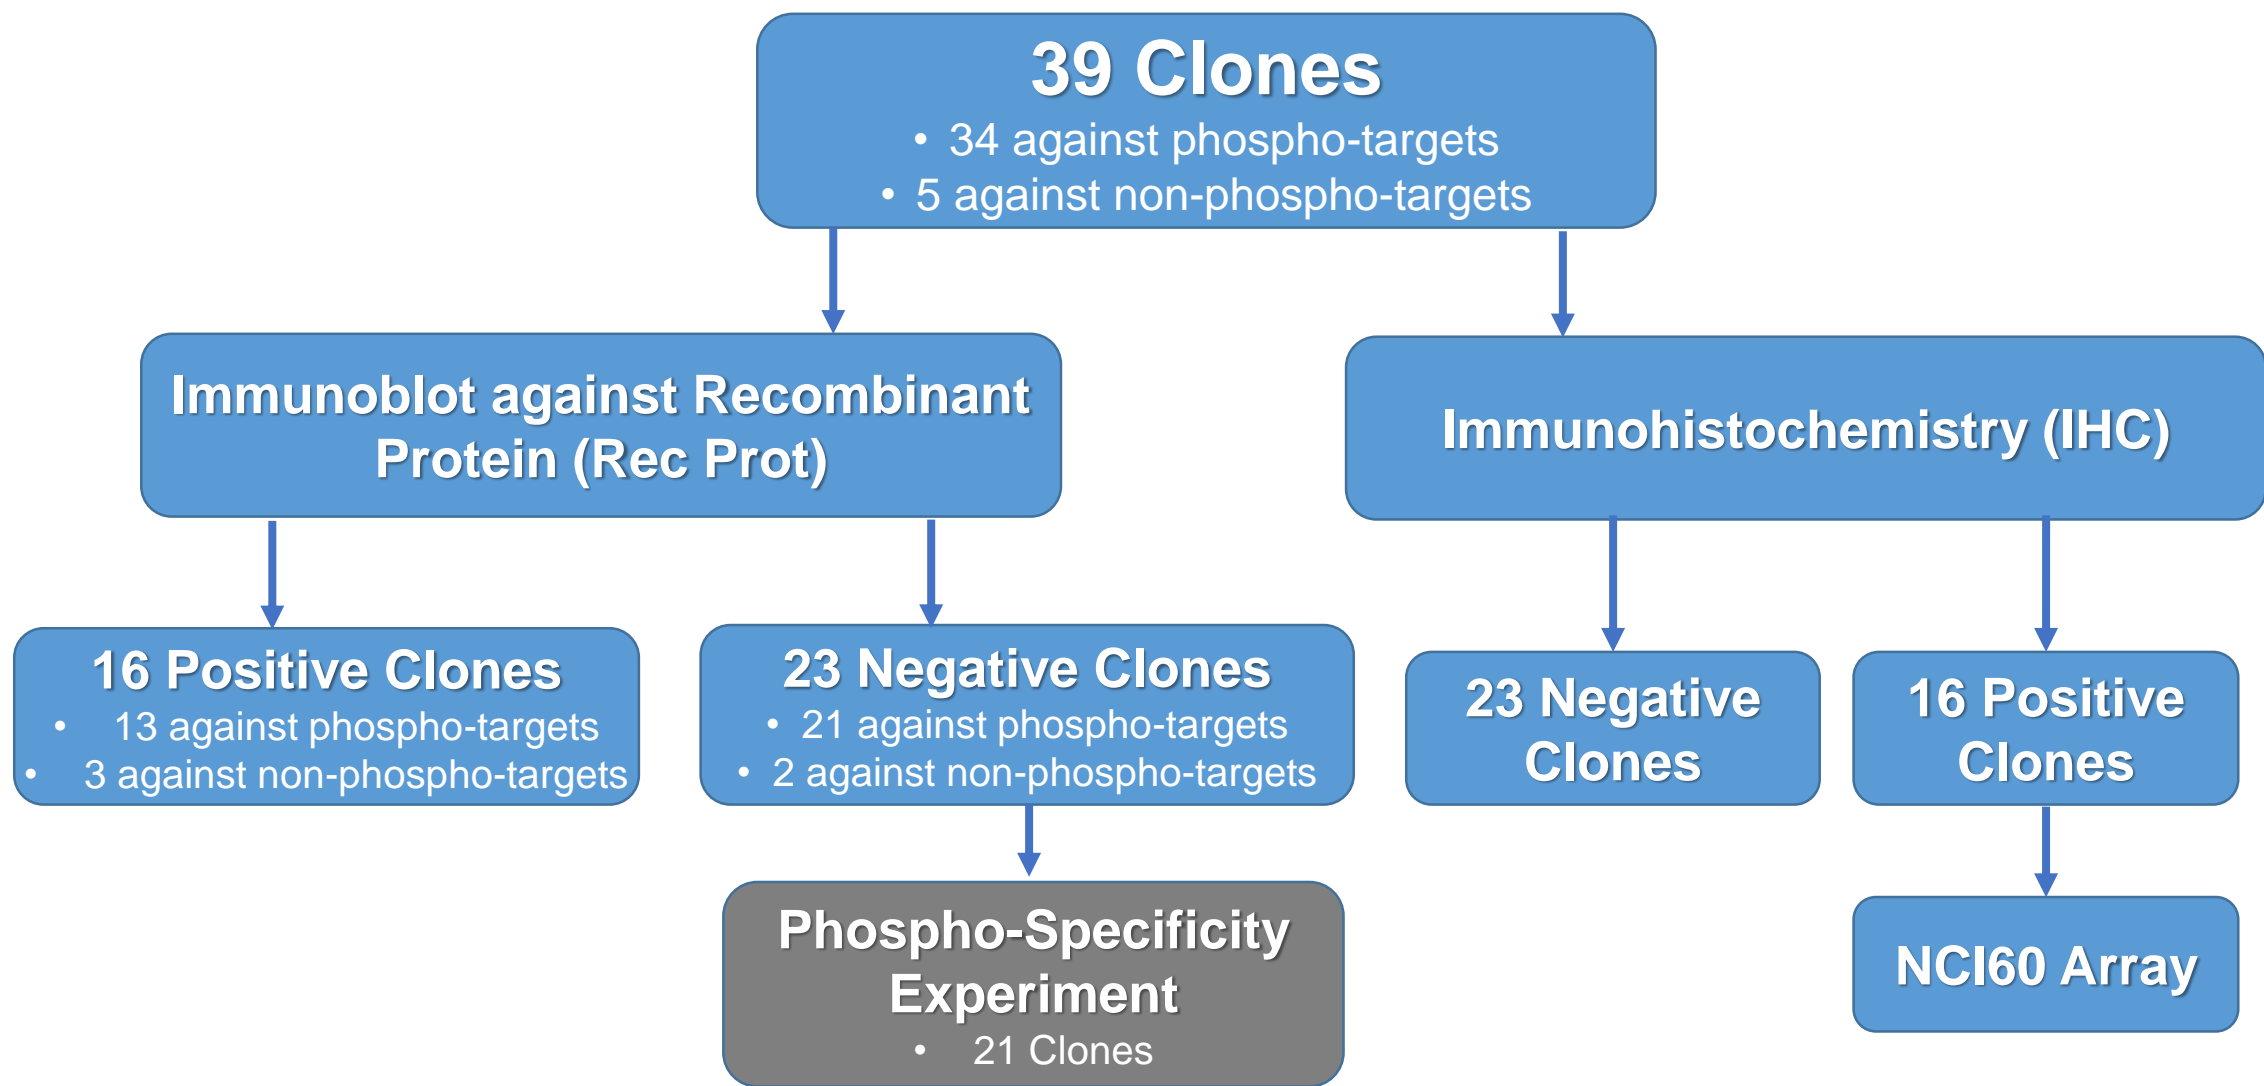

**Figure 1A. Flow chart for NCI56 antibody characterization primary screen**



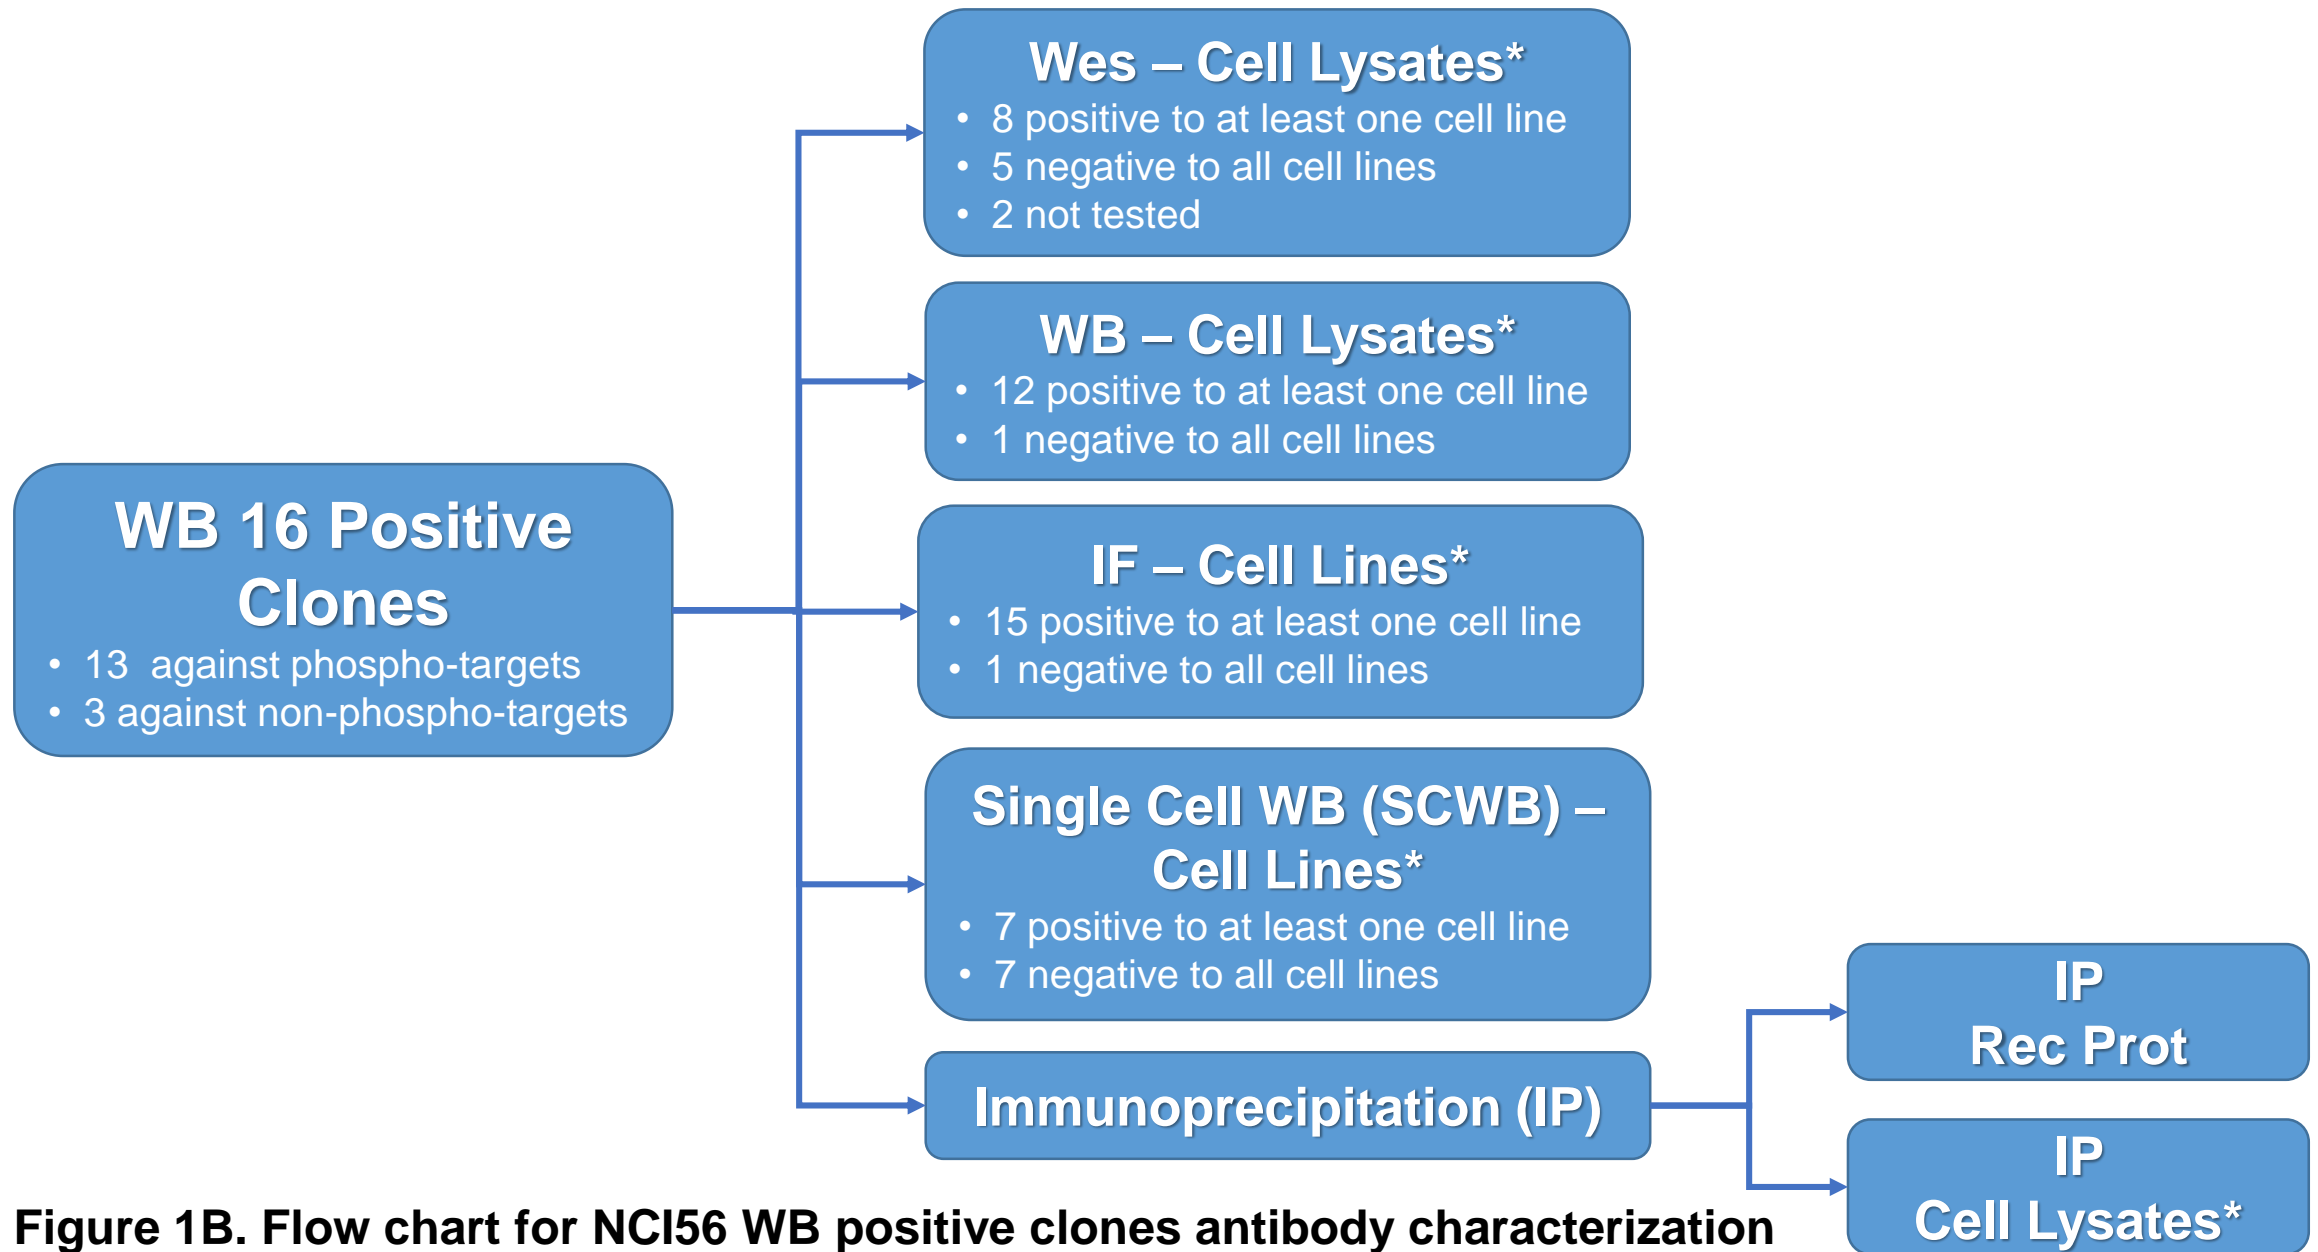

**Figure 1B. Flow chart for NCI56 WB positive clones antibody characterization**

**\* Cell lines - HeLa, MCF10A, LCL57**

## B. Methods

### Cell Culture and Lysis

Cell lines LCL57 (Coriell Institute) and HeLa (American Type Culture Collection ,ATCC) were cultured according to manufacturers' specifications. Empty vector transfected MCF10A-EV cells were a kind gift from James A. Wells (Department of Pharmaceutical Chemistry, University of California, San Francisco, CA) and were cultured according to Dr. Wells' specifications. Briefly, MCF10a-EV cells were cultured in DMEM/F-12 (Thermo Fisher Scientific) supplemented with 5% Horse Serum (Thermo Fisher Scientific), 20 ng/mL Epidermal Growth Factor (Thermo Fisher Scientific), 10 µg/mL Insulin (Sigma), 0.5 µg/mL Hydrocortisone (Sigma) and 100 ng/mL Cholera Toxin (Sigma) at 37°C in a humidified 5% carbon dioxide incubator. LCL57, HeLa and MCF10A-EV cells were cultured and harvested according to manufacturers' specifications to obtain cell pellets. Briefly, once cells were subcultured and after trypsinization, cells were centrifuged at 1500 rpm for 6 minutes and supernatant was removed and discarded. Cells were washed with 1X PBS, centrifuged as before, resuspended in 1X PBS and counted. Cells were split according to desired cell number in 15 mL centrifuge tubes and centrifuged as before. Centrifuge tubes with pellets were stored at -80°C until lysis. Cell pellets were lysed using RIPA lysis and extraction buffer (Thermo Fisher Scientific) following the manufacturer's protocol. Mammalian Protease Inhibitor (VWR) was added according to instructions. Lysate protein concentration was estimated with a BCA assay (Pierce) as described by the vendor.

### Immunoblot

Recombinant proteins were obtained from Origene (Rockville, MD) or Novus Biologicals (Littleton, CO); see "Western blot data and table" for catalog numbers. Western immunoassays were performed using traditional immunoblotting techniques according to the designed protocol described in the antibodies.cancer.gov SOP M-103, with the following modifications. Validation of proper protein sample loading was done using Bio-Rad Stain-Free precast gel confirmation. Traditional immunoblotting for recombinant protein were conducted at a concentration of 10 µg/ml in reducing conditions (200 ng total protein). Whole cell lysates were diluted to 2.5 mg/ml in reducing conditions (50 µg total protein). Transfer of protein from Bio-Rad pre-cast stain free gels were performed by Bio-Rad Turbo-Blot at "High MW" setting for 10 minutes. Blocking of the membrane was performed using Bio-Rad Blotting Grade Blocker at 5% in 1X PBS-0.5% Tween-20. Primary antibodies (1 mg/mL) were diluted in 1X PBS-0.5% Tween-20 to a dilution of 1:5000 at a total volume of 25 mL. Washing of membrane was conducted using 1X PBS-0.5% Tween-20 three times. Secondary HRP-linked rabbit specific antibody (Jackson ImmunoResearch, West Grove, PA) was diluted at 1:5000 in 1X PBS -0.5%Tween-20 at a volume of 25 mL. Immuno-detection was performed using colorimetric substrate Opti-4CN (Bio-Rad) at 1 mL per blot. Development of immunoblot was captured using Bio-Rad ChemiDoc MP imaging system.

## WES System

The Simple Western (Wes-ProteinSimple, USA) system was used to detect primary antibody binding to a target protein in cell lysates (HeLa, MCF10A, LCL57). The Simple Westerns were performed following the procedures detailed in the antibodies.cancer.gov SOP M-134 with modifications. Cell lysates were run using the 12-230 kDa separation module, 8 x 25 capillary cartridges (ProteinSimple) and detected with Anti-Rabbit Detection Module (ProteinSimple). Irradiated and phosphatase treated cell lysates were run at a concentration of 200 ug/mL and incubated with primary antibodies diluted 1:500.

## Phospho-Specificity Experiment

Monoclonal antibodies raised against phosphorylated peptides that did not recognize the recombinant protein in WB were tested for their phospho-specificity. For this experiment non-treated cells (HeLa, MCF10A, and LCL57) versus cells treated with irradiation as previously described (Whiteaker JR, Zhao L, Saul R, et al. A Multiplexed Mass Spectrometry-Based Assay for Robust Quantification of Phosphosignaling in Response to DNA Damage. *Radiat Res.* 2018;189(5):505-518. doi:10.1667/RR14963.1) were used. Cell pellets and irradiated cell pellets (positive controls) were lysed in ice cold lysis buffer (50 mM Tris, 10 mM NaCl, 5.0 mM MgCl<sub>2</sub>, 0.1 mM ZnCl<sub>2</sub>, 1% Triton X-100, 1.0 mM DTT, pH 8.0) for 20 minutes. Lysis buffer was supplemented with Mammalian Protease Inhibitor (VWR) on the day of lysis. The lysates were clarified by centrifugation at 14,000 rpm for 10 minutes at 4°C. Clarified lysate was removed and the protein concentration was quantified with the BCA protein assay kit (Pierce). Phosphatase treated lysates (negative controls) were treated with alkaline phosphatase enzyme from bovine intestinal mucosa (Sigma) for 1 hour at 37°C. Reactions were stopped by placing samples at -80°C until immunoblot analysis.

### **Immunofluorescence (IF) Staining**

The Human Protein Atlas Cell Atlas Standard Immunostaining Protocol was followed with minor modifications. Briefly, before starting, adherent cells were cultured overnight at 10,000 cells/well in 100  $\mu$ L cell culture media in a 12.5  $\mu$ g/mL superfibronectin (Sigma) coated 96-well glass bottom microplate (Sigma) and suspension cells were cultured in a Shi-fix™ coated 96-well microplate (Everest Biotech) according to manufacturer's instructions. The following day, cell culture media was removed from cells and cells were washed with 1X Phosphate Buffered Saline (PBS) (Fisher Scientific), fixed with 4% paraformaldehyde (VWR)/1X PBS, permeabilized with 0.1 % Triton X-100 (Sigma)/1X PBS, washed with 1X PBS and incubated with diluted primary antibodies (2  $\mu$ g/mL unless otherwise stated) with 1  $\mu$ g/mL mouse anti-alpha tubulin (Abcam) in blocking buffer (4% Fetal Bovine Serum (Thermo Fisher Scientific)/1X PBS)) overnight at 4°C. The next day, primary antibodies were removed from cells and cells were washed with 1X PBS, incubated with diluted secondary antibodies (2.5  $\mu$ g/mL anti-rabbit Alexa Fluor 488 (Thermo Fisher Scientific) with 2.5  $\mu$ g/mL anti-mouse Alexa Fluor 555 (Thermo Fisher Scientific) in blocking buffer) for 1.5 hours at room temperature (RT) in darkness. With minimum light present, secondary antibodies were removed from cells and cells were stained with 0.2  $\mu$ g/mL DAPI (VWR)/1X PBS, washed with 1X PBS and wells were filled with glycerol (Thermo Fisher Scientific)/10X PBS (Fisher Scientific). The 96-well microplate was sealed with an adhesive aluminum PCR plate seal (VWR) and stored at 4°C until IF analysis (Invitrogen™ EVOS™ M5000 Imaging System, (Thermo Fisher Scientific)).

### **Single-Cell Western Blot (SCWB)**

The Standard scWest Kit (ProteinSimple) was used and the kit protocol was followed. Briefly, cells were diluted to 100,000 cells/mL with 1X Suspension Buffer (SB)(ProteinSimple) and 1 mL cells was added to the chip to allow cells to settle for 15-20 mins. Chip with cells was rinsed with 1X SB, ran on Milo (ProteinSimple) where cells are lysed, separated and captured, washed with 1X Wash Buffer (WB) (ProteinSimple), incubated with primary antibody for 2 hours at RT, washed with 1X WB, incubated with fluorescently labeled secondary antibody (R&D System, Inc.) for 1 hour at RT, washed with 1X WB, rinsed with deionized water, spun dry on a Microarray Slide Spinner (Sigma Aldrich), imaged in a microarray scanner (ProteinSimple) and resulted image analyzed using Scout software (ProteinSimple).

### Immuno-Precipitation Mass Spectrometry (IP-MS)

The antibodies were tested by IP-MS against recombinant proteins and against lysates of selected cell lines by grouping the antibodies into two multiplexed groups with six to 8 mAbs per group. Both recombinant proteins (table 1) and monoclonal antibodies were diluted in 1X PBS/0.05% CHAPS at a concentration of 50 mg/mL. Equal volumes of antibodies and antigens (100  $\mu$ L) were mixed in a 96 deep well plate with 5  $\mu$ L of Pierce™ Protein G Magnetic Beads that were previously washed with 1X PBS/0.05% CHAPS. The plate was incubated overnight at 4°C with shaking in an Eppendorf Thermomixer. Bead washes (1X PBS/0.05% CHAPS) and elution (8M Urea/50 mM Tris/100 mM DTT elution plate) from the plate was performed automatically in a Thermo Fisher Scientific KingFisher Flex Magnetic Particle Processor. Eluates were alkylated with iodoacetamide (final concentration 50 mM) for 30 min at RT in the dark and desalted using Amicon® Ultra Centrifugal Filters, MW CO 3KDa (Millipore Sigma) until nominal urea concentration was <1M. The spin filters were transferred to a clean collection tube and the solution in the filters was spiked with 1 mg of Trypsin / Lys-C Mix, Mass Spec Grade (Promega). Negative controls (beads and recombinant protein, without antibody) were treated exactly the same as the IP samples. Protein and trypsin mixture were incubated overnight at 37°C in water vapor saturated incubator with shaking. Digested samples were spun and tryptic peptides were recovered in the collection tube by spinning. Samples were desalted with a SOLA $\mu$ ™ SPE HRP Plate according to vendor instructions, dried in a speed-vac device and reconstituted in 0.1% formic acid. The peptide digests were resolved using a nano-flow LC system (EASY-nLC 1200, Thermo Scientific) coupled on-line to a hybrid ion trap-orbitrap mass spectrometer (Orbitrap Elite, Thermo Scientific). Samples were injected onto 20 mm long, 75  $\mu$ m inner diameter, C18, 3  $\mu$ m particle size trapping column (EASY-Spray, Thermo Scientific) and separated using in line, 150 mm long, 75  $\mu$ m inner diameter, C18, 2  $\mu$ m particle size, analytical column (EASY-Spray, Thermo Scientific). The linear gradient for separation was 5–40% mobile phase B over 62 min at 300 nL/min flow rate, where mobile phase A was 0.1% formic acid in water, and mobile phase B was 0.1% formic acid in 80% acetonitrile. Mass spectrometer was operated in a data dependent mode scanning, using the ion mass to charge range of 350 - 1650, monitored at the resolution level of 60000 at m/z 400. Each MS1 scan was followed by MS2 scan, wherein the 20 most abundant precursor ions were dynamically selected for collision-induced dissociation using normalized collision energy of 35%. Proteins were identified applying the SEQUEST HT algorithm search against the non-redundant human proteome database (i.e., SwissProt release v57.15) utilizing the software Proteome Discoverer 1.4 (Thermo Scientific). The database search thresholds included: for the monoisotopic peptide precursor ions (i.e., MS1 spectra) mass tolerance was set at 10 ppm and for the fragment ions (i.e., data-dependent MS2 spectra) mass tolerance was set at 0.6 Da. Dynamic amino acid modifications were added for the detection of the following: +57.021 Da for cysteine. IP experiments were also performed with LCL57, HeLa and MCF10A cell lysates. Cell were lysed as described above. Lysate protein concentration was estimated with a BCA assay (Pierce). Each cell lysate was incubated with 5  $\mu$ g of antibody and 5 mL of Protein G beads. Pull-down, proteolytic digestion and analysis were performed as described above for the recombinant protein experiment. IP data were compared with negative controls (beads and lysate digests, without antibody).

### **Immunohistochemistry Pancreatic Cancer Tissue Micro-array (TMA)**

IHC was used to test the specificity of the antibodies using NCI60 protein array as well as a pancreatic cancer tissue micro array (TMA). Tissues were sectioned into 4µm sections and adhered to positively charged glass microscope slides. Slides were deparaffinized using the Leica Autostainer model XL (Leica) following the protocol detailed in the antibodies.cancer.gov SOP M-106. A 1x Antigen Retrieval buffer (Dako) was prepared and slides were placed into the buffer and placed in a pressure cooker at 123°C for 30 minutes. When the pressure cooker was finished, the slides were removed and allowed to cool to room temperature. Slides were then loaded on to the Dako Autostainer Model LV-1 (Agilent Technologies) and rinsed with IHC wash buffer (Dako). The slides were incubated in a hydrogen peroxide block (Cell Marque) for 10 mins at room temperature. The slides were then rinsed with IHC wash buffer. The slides were then incubated with a protein block (Dako) for 10 minutes at room temperature. Primary antibody was diluted using antibody diluent (Dako). Primary Antibody solution was added to slides and incubated for 1 hour at room temperature. Slides were rinsed with IHC wash buffer. Rabbit HRP secondary antibody (Dako) was added and incubated for 30 minutes at room temperature. Slides were rinsed with IHC wash buffer (Dako). The DAB substrate was prepared by mixing 1mL of substrate buffer (Cell Marque) with 1 drop of DAB chromogen (Cell Marque). DAB solution was added to the slides and incubated for 10 minutes at room temperature. The slides were rinsed with IHC wash buffer. The slides were then removed from Autostainer and placed back on the Leica Autostainer model XL for the hematoxylin counterstain. Slides were removed from Leica Autostainer and a coverslip was applied using cyto seal XYL mounting medium (Richard Allen Scientific).

### **Immunohistochemistry NCI60 Protein Array**

IHC was performed on the NCI60 protein array using the NCI56 antibodies that were selected by the pathologist. IHC staining protocol above was used on the NCI60 protein array using the optimal conditions selected by the pathologist. Once staining was completed slides were scanned using a Hamamatsu NanoZoomer-XR digital slide scanner (Hamamatsu). Image analysis was completed to determine the staining intensity of each core on the array. Staining intensity ranged from 0-3, 0 being negative or no stain and 3 being the most intense.

## C. Tables

Table 1: Western blot (WB) against recombinant protein screening results (Part A)

| CPTC Antibody name | Gene   | Sequence                              | Modification site | Antigen Vendor    | Antigen Cat. #     | WB results |
|--------------------|--------|---------------------------------------|-------------------|-------------------|--------------------|------------|
| CPTC-ACT Group-1   | ACT    | AVFPSIVGRPR                           |                   | Origene           | TP303643           | Negative   |
| CPTC-CASP3-1       | CASP3  | IIHGSES(ph)MDSGISLDNSYK               | S26               | Origene           | TP304444           | Negative   |
| CPTC-CDC25B-1      | CDC25B | LLGHS(ph)PVLR                         | S160              | Origene           | LY402883           | Positive   |
| CPTC-CDC25B-2      | CDC25B | SPS(ph)MPC(Cam)SVIRPILK               | S323              | Origene           | LY402883           | Negative   |
| CPTC-CDC25C-1      | CDC25C | SPS(ph)MPENLNRPR                      | S216              | Origene           | TP305641           | Negative   |
| CPTC-CDCA8-1       | CDCA8  | LTAEAIQT(ph)PLK                       | T106              | Origene           | TP760482           | Negative   |
| CPTC-CDK1-1        | CDK1   | VYT(ph)HEVVTLWYR                      | T161              | Origene           | TP300495           | Positive   |
| CPTC-CDK7-1        | CDK7   | AYT(ph)HQVVTR                         | T170              | Origene           | TP302736           | Positive   |
| CPTC-CHEK1-6       | CHEK1  | VTSGGVSES(ph)PSGFSK                   | S286              | Origene           | TP325807           | Positive   |
| CPTC-CHEK2-1       | CHEK2  | ILGETS(ph)LM(ox)R                     | S379              | Origene           | TP301278           | Negative   |
| CPTC-CHEK2-2       | CHEK2  | TLC(Cam)GT(ph)PTYLAPEVLV<br>SVGTAGYNR | T387              | Origene           | TP301278           | Positive   |
| CPTC-GAPDH-1       | GAPDH  | GALQNIIPASTGAAK                       |                   | Origene           | TP302309           | Positive   |
| CPTC-KNL1-1        | CASC5  | SLS(ph)NPTPDYC(Cam)HDK                | S767              | Novus Biologicals | H00057082-Q01-25ug | Negative   |

Table 1: Western blot (WB) against recombinant protein screening results (Part B)

| CPTC Antibody name | Gene   | Sequence                          | Modification site | Antigen Vendor    | Antigen Cat. #  | WB results |
|--------------------|--------|-----------------------------------|-------------------|-------------------|-----------------|------------|
| CPTC-KRT Group A-1 | KRTA   | LAADDFR                           |                   | Origene           | TP309707        | Positive   |
| CPTC-KRT Group B-1 | KRTB   | ELQSQISDTSVVLMDNSR                |                   | Origene           | TP309570        | Positive   |
| CPTC-LAT-1         | LAT    | EYVNVS(ph)QELHPGAAK               | S224              | Novus Biologicals | NBP1-72479-50ug | Positive   |
| CPTC-LIME1-1       | LIME1  | SSTC(Cam)GAGT(ph)PPASSC(Cam)PSLGR | T274              | Origene           | LY413516        | Negative   |
| CPTC-LMNB1-1       | LMNB1  | AGGPTT(ph)PLS(ph)PTR              | S23;T20           | Origene           | TP301604        | Negative   |
| CPTC-LMNB1-2       | LMNB1  | AGGPTT(ph)PLS(ph)PTR              | S23;T20           | Origene           | TP301604        | Positive   |
| CPTC-MCM6-1        | MCM6   | EIESEIDS(ph)EEELINK               | S762              | Origene           | TP307097        | Negative   |
| CPTC-MDM2-1        | MDM2   | AIS(ph)ETEENSDELSGER              | S166              | Origene           | TP761916        | Positive   |
| CPTC-MKI67-3       | MKI67  | DINTFLGT(ph)PVQK                  | T1801             | Origene           | TP710117        | Negative   |
| CPTC-MKI67-4       | MKI67  | NINTFVET(ph)PVQK                  | T2406             | Origene           | TP710117        | Negative   |
| CPTC-MRE11A-1      | MRE11A | IMS(ph)QSQVSK                     | S676              | Origene           | TP309414        | Negative   |
| CPTC-NCAPH2-1      | NCAPH2 | FVQETELS(ph)QR                    | S492              | Origene           | TP317604        | Negative   |



Table 1: Western blot (WB) against recombinant protein screening results (Part C)

| CPTC Antibody name | Gene     | Sequence                            | Modification site | Antigen Vendor    | Antigen Cat. # | WB results |
|--------------------|----------|-------------------------------------|-------------------|-------------------|----------------|------------|
| CPTC-NUMA1-1       | NUMA1    | LSQLEEHL(ph)QLQDNPPQEK              | S395              | Origene           | LY416823       | Negative   |
| CPTC-PAK4-1        | PAK4     | RPLS(ph)GPDVGTPQPAGLASG<br>AK       | S181              | Origene           | TP302302       | Positive   |
| CPTC-PARP1-2       | PARP1    | MAIMVQS(ph)PMFDGK                   | S41               | Origene           | TP307085       | Negative   |
| CPTC-RAD50-2       | RAD50    | YELQQLEGS(ph)SDR                    | S470              | Novus Biologicals | NBL1-15116     | Negative   |
| CPTC-RAD9A-1       | RAD9A    | SPQGSPVLAEDS(ph)EGEG                | S387              | Origene           | TP304439       | Negative   |
| CPTC-RTF1-1        | RTF1     | SASDLS(ph)EDLFK                     | S655              | Origene           | LY432360       | Negative   |
| CPTC-RTF1-2        | RTF1     | SASDLS(ph)EDLFK                     | S655              | Origene           | LY432360       | Negative   |
| CPTC-SAAL1-1       | SAAL1    | NGAAQPLDQPQEES(ph)EEQP<br>VFR       | S237              | Origene           | TP304551       | Positive   |
| CPTC-TNFRSF17-1    | TNFRSF17 | SLPAALS(ph)ATEIEK                   | S173              | Origene           | TP723029       | Negative   |
| CPTC-TP53-1        | TP53     | ALPNNTSSS(ph)PQPK                   | pS315             | Origene           | TP300003       | Positive   |
| CPTC-TP53-2        | TP53     | MEEPQSDPSVEPPLS(ph)QETF<br>SDLWK    | pS15              | Origene           | TP300003       | Positive   |
| CPTC-TP53BP1-1     | TP53BP1  | IDEDGENT(ph)QIEDTEPMS(p<br>h)PVLNSK | T543              | Origene           | TP318016       | Positive   |
| CPTC-TUBB-1        | TUBB     | ISVYYNEATGGK                        |                   | Origene           | TP303629       | Negative   |
| CPTC-UTP14A-1      | UTP14A   | DSGS(ph)QEVLSLR                     | S453              | Origene           | TP710267       | Negative   |

Table 2: Western blot (WB) against cell lysates screening results

| CPTC Antibody name | LCL57     | HeLa      | MCF10A    |
|--------------------|-----------|-----------|-----------|
| CPTC-CDC25B-1      | Positive  | Positive  | Positive  |
| CPTC-CDK1-1        | Positive  | Positive  | Positive  |
| CPTC-CDK7-1        | Positive  | Positive  | Positive  |
| CPTC-CHEK1-6       | Positive  | Positive  | Positive  |
| CPTC-CHEK2-2       | Uncertain | Uncertain | Uncertain |
| CPTC-GAPDH-1       | Positive  | Positive  | Positive  |
| CPTC-KRT Group A-1 | Negative  | Positive  | Positive  |
| CPTC-KRT Group B-1 | Negative  | Positive  | Positive  |
| CPTC-LAT-1         | Positive  | Positive  | Positive  |
| CPTC-LMNB1-2       | Positive  | Positive  | Positive  |
| CPTC-MDM2-1        | Positive  | Positive  | Positive  |
| CPTC-PAK4-1        | Negative  | Negative  | Negative  |
| CPTC-SAAL1-1       | Positive  | Negative  | Negative  |
| CPTC-TP53-1        | Uncertain | Uncertain | Uncertain |
| CPTC-TP53-2        | Positive  | Positive  | Positive  |
| CPTC-TP53BP1-1     | Uncertain | Uncertain | Uncertain |

Table 3: Simple Western (Wes) against cell lysates screening results

| CPTC Antibody name | LCL57             | HeLa              | MCF10A            |
|--------------------|-------------------|-------------------|-------------------|
| CPTC-CDC25B-1      | Negative          | Negative          | Negative          |
| CPTC-CDK1-1        | Positive          | Positive          | Positive          |
| CPTC-CDK7-1        | Positive          | Positive          | Positive          |
| CPTC-CHEK1-6       | Negative          | Negative          | Positive          |
| CPTC-CHEK2-2       | Positive          | Positive          | Positive          |
| CPTC-GAPDH-1       | Positive          | Positive          | Positive          |
| CPTC-KRT Group A-1 | <i>not tested</i> | <i>not tested</i> | <i>not tested</i> |
| CPTC-KRT Group B-1 | Negative          | Positive          | Positive          |
| CPTC-LAT-1         | Negative          | Negative          | Negative          |
| CPTC-LMNB1-2       | Negative          | Negative          | Negative          |
| CPTC-MDM2-1        | Uncertain         | Uncertain         | Uncertain         |
| CPTC-PAK4-1        | Positive          | Positive          | Positive          |
| CPTC-SAAL1-1       | Positive          | Uncertain         | Positive          |
| CPTC-TP53-1        | Negative          | Positive          | Negative          |
| CPTC-TP53-2        | Positive          | Positive          | Positive          |
| CPTC-TP53BP1-1     | <i>not tested</i> | <i>not tested</i> | <i>not tested</i> |

Table 4: Phospho-specificity experiment – Simple Western (Wes) against cell lysates screening results

| <b>CPTC</b>          | <b>LCL57</b> | <b>HeLa</b> | <b>MCF10A</b> |
|----------------------|--------------|-------------|---------------|
| <b>Antibody name</b> |              |             |               |
| CPTC-CASP3-1         | Negative     | Negative    | Negative      |
| CPTC-CDC25B-2        | Negative     | Negative    | Negative      |
| CPTC-CDC25C-1        | Negative     | Negative    | Negative      |
| CPTC-CDCA8-1         | Negative     | Negative    | Negative      |
| CPTC-CHEK2-1         | Negative     | Negative    | Negative      |
| CPTC-KNL1-1          | Negative     | Negative    | Negative      |
| CPTC-LIME1-1         | Negative     | Negative    | Negative      |
| CPTC-LMNB1-1         | Negative     | Negative    | Negative      |
| CPTC-MCM6-1          | Negative     | Negative    | Negative      |
| CPTC-MKI67-3         | Negative     | Uncertain   | Uncertain     |
| CPTC-MKI67-4         | Negative     | Negative    | Negative      |
| CPTC-MRE11A-1        | Negative     | Negative    | Negative      |
| CPTC-NCAPH2-1        | Negative     | Negative    | Negative      |
| CPTC-NUMA1-1         | Positive     | Positive    | Positive      |
| CPTC-PARP1-2         | Negative     | Negative    | Negative      |
| CPTC-RAD50-2         | Negative     | Negative    | Negative      |
| CPTC-RAD9A-1         | Negative     | Positive    | Negative      |
| CPTC-RTF1-1          | Negative     | Negative    | Negative      |
| CPTC-RTF1-2          | Negative     | Negative    | Negative      |
| CPTC-TNFRSF17-1      | Negative     | Negative    | Uncertain     |
| CPTC-UTP14A-1        | Negative     | Negative    | Uncertain     |

Table 5: Phospho-specificity experiment – Western Blot (WB) against cell lysates confirmation results

| <b>CPTC</b>          | <b>LCL57</b> | <b>HeLa</b> | <b>MCF10A</b> |
|----------------------|--------------|-------------|---------------|
| <b>Antibody name</b> |              |             |               |
| CPTC-MKI67-3         | Negative     | Negative    | Negative      |
| CPTC-NUMA1-1         | Positive     | Uncertain   | Uncertain     |
| CPTC-RAD9A-1         | Uncertain    | Uncertain   | Negative      |
| CPTC-TNFRSF17-1      | Negative     | Negative    | Negative      |
| CPTC-UTP14A-1        | Negative     | Negative    | Negative      |

Table 6: Immuno-Fluorescence (IF) in cell lines screening results

| CPTC Antibody name | LCL57    | HeLa     | MCF10A   |
|--------------------|----------|----------|----------|
| CPTC-CDC25B-1      | Positive | Negative | Negative |
| CPTC-CDK1-1        | Positive | Positive | Positive |
| CPTC-CDK7-1        | Positive | Positive | Negative |
| CPTC-CHEK1-6       | Negative | Negative | Positive |
| CPTC-CHEK2-2       | Positive | Negative | Negative |
| CPTC-GAPDH-1       | Positive | Positive | Positive |
| CPTC-KRT Group A-1 | Positive | Positive | Positive |
| CPTC-KRT Group B-1 | Negative | Positive | Positive |
| CPTC-LAT-1         | Negative | Negative | Negative |
| CPTC-LMNB1-2       | Positive | Positive | Positive |
| CPTC-MDM2-1        | Positive | Positive | Positive |
| CPTC-PAK4-1        | Positive | Negative | Negative |
| CPTC-SAAL1-1       | Positive | Negative | Negative |
| CPTC-TP53-1        | Positive | Positive | Positive |
| CPTC-TP53-2        | Positive | Positive | Positive |
| CPTC-TP53BP1-1     | Positive | Positive | Positive |

Table 7: Single Cell Western blot (SCWB) in cell lines screening results

| CPTC Antibody name | LCL57             | HeLa              | MCF10A            |
|--------------------|-------------------|-------------------|-------------------|
| CPTC-CDC25B-1      | Negative          | Negative          | Negative          |
| CPTC-CDK1-1        | Positive          | Positive          | Positive          |
| CPTC-CDK7-1        | Positive          | Positive          | Positive          |
| CPTC-CHEK1-6       | Negative          | Negative          | Negative          |
| CPTC-CHEK2-2       | Negative          | Negative          | Negative          |
| CPTC-GAPDH-1       | <i>not tested</i> | <i>not tested</i> | <i>not tested</i> |
| CPTC-KRT Group A-1 | Negative          | Positive          | Positive          |
| CPTC-KRT Group B-1 | Negative          | Positive          | Positive          |
| CPTC-LAT-1         | Negative          | Negative          | Negative          |
| CPTC-LMNB1-2       | Positive          | Positive          | Positive          |
| CPTC-MDM2-1        | Positive          | Positive          | Positive          |
| CPTC-PAK4-1        | Negative          | Negative          | Negative          |
| CPTC-SAAL1-1       | Negative          | Negative          | Negative          |
| CPTC-TP53-1        | Negative          | Negative          | Negative          |
| CPTC-TP53-2        | Positive          | Positive          | Positive          |
| CPTC-TP53BP1-1     | <i>not tested</i> | <i>not tested</i> | <i>not tested</i> |

Table 8: Immuno-precipitation (IP) with recombinant protein and cell lysates screening results

| CPTC Antibody name | Recombinant Protein | LCL57    | HeLa     | MCF10A   |
|--------------------|---------------------|----------|----------|----------|
| CPTC-CDC25B-1      | <i>not tested</i>   | Negative | Negative | Negative |
| CPTC-CDK1-1        | Weak                | Negative | Negative | Negative |
| CPTC-CDK7-1        | Weak                | Negative | Negative | Negative |
| CPTC-CHEK1-6       | Weak                | Negative | Negative | Negative |
| CPTC-CHEK2-2       | Positive            | Negative | Negative | Negative |
| CPTC-GAPDH-1       | Positive            | Negative | Weak     | Negative |
| CPTC-KRT Group A-1 | <i>not tested</i>   | Weak     | Weak     | Negative |
| CPTC-KRT Group B-1 | Positive            | Negative | Positive | Negative |
| CPTC-LAT-1         | Positive            | Negative | Negative | Negative |
| CPTC-LMNB1-2       | Positive            | Negative | Negative | Negative |
| CPTC-MDM2-1        | <i>not tested</i>   | Negative | Negative | Negative |
| CPTC-PAK4-1        | Positive            | Negative | Negative | Negative |
| CPTC-SAAL1-1       | Positive            | Negative | Negative | Negative |
| CPTC-TP53-1        | Weak                | Negative | Negative | Negative |
| CPTC-TP53-2        | Positive            | Negative | Negative | Negative |
| CPTC-TP53BP1-1     | <i>not tested</i>   | Positive | Weak     | Negative |

| ID               | Antigen Accession # | CPTC Ab name       | Coverage | # Proteins | # Unique Peptides | # Peptides | # PSMs | D peptide | D PSMs | PSM ratio (IP/Neg Ctrl) |
|------------------|---------------------|--------------------|----------|------------|-------------------|------------|--------|-----------|--------|-------------------------|
| Negative Control | P06493              | CPTC-CDK1-1        | 53.20    | 28         | 13                | 13         | 16     | 2         | 3      | 1.2                     |
| IP               | P06493              | CPTC-CDK1-1        | 50.17    | 27         | 14                | 15         | 19     |           |        |                         |
| Negative Control | P50613              | CPTC-CDK7-1        | 42.20    | 3          | 19                | 19         | 28     | 3         | 10     | 1.4                     |
| IP               | P50613              | CPTC-CDK7-1        | 52.31    | 3          | 22                | 22         | 38     |           |        |                         |
| Negative Control | O14757              | CPTC-CHEK1-6       | 35.29    | 1          | 15                | 15         | 16     | 2         | 3      | 1.2                     |
| IP               | O14757              | CPTC-CHEK1-6       | 36.55    | 1          | 17                | 17         | 19     |           |        |                         |
| Negative Control | O96017              | CPTC-CHEK2-2       | 39.78    | 1          | 16                | 16         | 17     | 11        | 49     | 3.9                     |
| IP               | O96017              | CPTC-CHEK2-2       | 50.28    | 1          | 27                | 27         | 66     |           |        |                         |
| Negative Control | P04406              | CPTC-GAPDH-1       | 22.39    | 2          | 6                 | 6          | 10     | 13        | 49     | 5.9                     |
| IP               | P04406              | CPTC-GAPDH-1       | 66.87    | 2          | 19                | 19         | 59     |           |        |                         |
| Negative Control | P05787              | CPTC-KRT Group B-1 | 20.50    | 14         | 3                 | 7          | 9      | 42        | 109    | 13.1                    |
| IP               | P05787              | CPTC-KRT Group B-1 | 71.43    | 16         | 41                | 49         | 118    |           |        |                         |
| Negative Control | O43561              | CPTC-LAT-1         | 6.11     | 1          | 1                 | 1          | 4      | 5         | 6      | 2.5                     |
| IP               | O43561              | CPTC-LAT-1         | 50.00    | 1          | 6                 | 6          | 10     |           |        |                         |
| Negative Control | P20700              | CPTC-LMNB1-2       | 16.89    | 1          | 9                 | 9          | 10     | 10        | 12     | 2.2                     |
| IP               | P20700              | CPTC-LMNB1-2       | 30.20    | 1          | 19                | 19         | 22     |           |        |                         |
| Negative Control | O96013              | CPTC-PAK4-1        | 10.49    | 3          | 5                 | 5          | 6      | 10        | 16     | 3.7                     |
| IP               | O96013              | CPTC-PAK4-1        | 32.49    | 3          | 15                | 15         | 22     |           |        |                         |
| Negative Control | Q96ER3              | CPTC-SAAL1-1       | 5.91     | 1          | 2                 | 2          | 2      | 15        | 31     | 16.5                    |
| IP               | Q96ER3              | CPTC-SAAL1-1       | 37.97    | 1          | 17                | 17         | 33     |           |        |                         |
| Negative Control | P04637              | CPTC-TP53-1        | 41.22    | 1          | 16                | 16         | 31     | 5         | 16     | 1.5                     |
| IP               | P04637              | CPTC-TP53-1        | 49.36    | 1          | 21                | 21         | 47     |           |        |                         |
| Negative Control | P04637              | CPTC-TP53-2        | 47.58    | 1          | 18                | 18         | 30     | 5         | 39     | 2.3                     |
| IP               | P04637              | CPTC-TP53-2        | 49.11    | 1          | 23                | 23         | 69     |           |        |                         |

Table 9: Immuno-precipitation (IP) with recombinant protein screening results – details

*Note: PSM ratio (IP/negative Control) below 1 has been indicated as negative; values of PMS ratio between 1 and 2 are considered weak; PSM ratio values above 2 have been assigned as positive*

| ID               | Antigen Accession # | CPTC Ab name       | Coverage | # Proteins | # Unique Peptides | # Peptides | # PSMs | D peptide | D PSMs | PSM ratio (IP/Neg Ctrl) |
|------------------|---------------------|--------------------|----------|------------|-------------------|------------|--------|-----------|--------|-------------------------|
| Negative Control | P30305              | CPTC-CDC25B-1      | 0.00     | 0          | 0                 | 0          | 0      | 0         | 0      | N/A                     |
| IP               | P30305              | CPTC-CDC25B-1      | 0.00     | 0          | 0                 | 0          | 0      |           |        |                         |
| Negative Control | P06493              | CPTC-CDK1-1        | 0.00     | 0          | 0                 | 0          | 0      | 0         | 0      | N/A                     |
| IP               | P06493              | CPTC-CDK1-1        | 0.00     | 0          | 0                 | 0          | 0      |           |        |                         |
| Negative Control | P50613              | CPTC-CDK7-1        | 0.00     | 0          | 0                 | 0          | 0      | 0         | 0      | N/A                     |
| IP               | P50613              | CPTC-CDK7-1        | 0.00     | 0          | 0                 | 0          | 0      |           |        |                         |
| Negative Control | O14757              | CPTC-CHEK1-6       | 0.00     | 0          | 0                 | 0          | 0      | 0         | 0      | N/A                     |
| IP               | O14757              | CPTC-CHEK1-6       | 0.00     | 0          | 0                 | 0          | 0      |           |        |                         |
| Negative Control | O96017              | CPTC-CHEK2-2       | 0.00     | 0          | 0                 | 0          | 0      | 0         | 0      | N/A                     |
| IP               | O96017              | CPTC-CHEK2-2       | 0.00     | 0          | 0                 | 0          | 0      |           |        |                         |
| Negative Control | P04406              | CPTC-GAPDH-1       | 6.57     | 2          | 2                 | 2          | 2      | -1        | -1     | 0.5                     |
| IP               | P04406              | CPTC-GAPDH-1       | 4.48     | 1          | 1                 | 1          | 1      |           |        |                         |
| Negative Control | P04264              | CPTC-KRT Group A-1 | 44.41    | 2          | 23                | 27         | 32     | 7         | 12     | 1.4                     |
| IP               | P04264              | CPTC-KRT Group A-1 | 50.00    | 3          | 31                | 34         | 44     |           |        |                         |
| Negative Control | P05787              | CPTC-KRT Group B-1 | 0.00     | 0          | 0                 | 0          | 0      | 0         | 0      | N/A                     |
| IP               | P05787              | CPTC-KRT Group B-1 | 0.00     | 0          | 0                 | 0          | 0      |           |        |                         |
| Negative Control | O43561              | CPTC-LAT-1         | 0.00     | 0          | 0                 | 0          | 0      | 0         | 0      | N/A                     |
| IP               | O43561              | CPTC-LAT-1         | 0.00     | 0          | 0                 | 0          | 0      |           |        |                         |
| Negative Control | P20700              | CPTC-LMNB1-2       | 0.00     | 0          | 0                 | 0          | 0      | 1         | 1      | N/A                     |
| IP               | P20700              | CPTC-LMNB1-2       | 2.05     | 1          | 1                 | 1          | 1      |           |        |                         |
| Negative Control | Q00987              | CPTC-MDM2-1        | 0.00     | 0          | 0                 | 0          | 0      | 0         | 0      | N/A                     |
| IP               | Q00987              | CPTC-MDM2-1        | 0.00     | 0          | 0                 | 0          | 0      |           |        |                         |
| Negative Control | O96013              | CPTC-PAK4-1        | 0.00     | 0          | 0                 | 0          | 0      | 0         | 0      | N/A                     |
| IP               | O96013              | CPTC-PAK4-1        | 0.00     | 0          | 0                 | 0          | 0      |           |        |                         |
| Negative Control | Q96ER3              | CPTC-SAAL1-1       | 0.00     | 0          | 0                 | 0          | 0      | 0         | 0      | N/A                     |
| IP               | Q96ER3              | CPTC-SAAL1-1       | 0.00     | 0          | 0                 | 0          | 0      |           |        |                         |
| Negative Control | P04637              | CPTC-TP53-1        | 0.00     | 0          | 0                 | 0          | 0      | 0         | 0      | N/A                     |
| IP               | P04637              | CPTC-TP53-1        | 0.00     | 0          | 0                 | 0          | 0      |           |        |                         |
| Negative Control | P04637              | CPTC-TP53-2        | 0.00     | 0          | 0                 | 0          | 0      | 0         | 0      | N/A                     |
| IP               | P04637              | CPTC-TP53-2        | 0.00     | 0          | 0                 | 0          | 0      |           |        |                         |
| Negative Control | Q12888              | CPTC-TP53BP1-1     | 0.66     | 1          | 1                 | 1          | 1      | 26        | 31     | 32.0                    |
| IP               | Q12888              | CPTC-TP53BP1-1     | 19.32    | 1          | 27                | 27         | 32     |           |        |                         |

Table 10: Immuno-precipitation (IP) with LCL57 cell lysates screening results – details

*Note: PSM ratio (IP/negative Control) below 1 has been indicated as negative; values of PMS ratio between 1 and 2 are considered weak; PSM ratio values above 2 have been assigned as positive*

| ID               | Antigen Accession # | CPTC Ab name       | Coverage | # Proteins | # Unique Peptides | # Peptides | # PSMs | D peptide | D PSMs | PSM ratio (IP/Neg Ctrl) |
|------------------|---------------------|--------------------|----------|------------|-------------------|------------|--------|-----------|--------|-------------------------|
| Negative Control | P30305              | CPTC-CDC25B-1      | 0.00     | 0          | 0                 | 0          | 0      | 0         | 0      | N/A                     |
| IP               | P30305              | CPTC-CDC25B-1      | 0.00     | 0          | 0                 | 0          | 0      |           |        |                         |
| Negative Control | P06493              | CPTC-CDK1-1        | 3.37     | 1          | 1                 | 1          | 1      | -1        | -1     | 0.0                     |
| IP               | P06493              | CPTC-CDK1-1        | 0.00     | 0          | 0                 | 0          | 0      |           |        |                         |
| Negative Control | P50613              | CPTC-CDK7-1        | 0.00     | 0          | 0                 | 0          | 0      | 0         | 0      | N/A                     |
| IP               | P50613              | CPTC-CDK7-1        | 0.00     | 0          | 0                 | 0          | 0      |           |        |                         |
| Negative Control | O14757              | CPTC-CHEK1-6       | 0.00     | 0          | 0                 | 0          | 0      | 0         | 0      | N/A                     |
| IP               | O14757              | CPTC-CHEK1-6       | 0.00     | 0          | 0                 | 0          | 0      |           |        |                         |
| Negative Control | O96017              | CPTC-CHEK2-2       | 0.00     | 0          | 0                 | 0          | 0      | 0         | 0      | N/A                     |
| IP               | O96017              | CPTC-CHEK2-2       | 0.00     | 0          | 0                 | 0          | 0      |           |        |                         |
| Negative Control | P04406              | CPTC-GAPDH-1       | 13.73    | 1          | 4                 | 4          | 4      | 2         | 3      | 1.8                     |
| IP               | P04406              | CPTC-GAPDH-1       | 22.69    | 1          | 6                 | 6          | 7      |           |        |                         |
| Negative Control | P04264              | CPTC-KRT Group A-1 | 37.27    | 3          | 19                | 22         | 25     | 3         | 10     | 1.4                     |
| IP               | P04264              | CPTC-KRT Group A-1 | 43.17    | 3          | 21                | 25         | 35     |           |        |                         |
| Negative Control | P05787              | CPTC-KRT Group B-1 | 9.32     | 11         | 1                 | 5          | 6      | 6         | 6      | 2.0                     |
| IP               | P05787              | CPTC-KRT Group B-1 | 21.33    | 8          | 5                 | 11         | 12     |           |        |                         |
| Negative Control | O43561              | CPTC-LAT-1         | 0.00     | 0          | 0                 | 0          | 0      | 0         | 0      | N/A                     |
| IP               | O43561              | CPTC-LAT-1         | 0.00     | 0          | 0                 | 0          | 0      |           |        |                         |
| Negative Control | P20700              | CPTC-LMNB1-2       | 0.00     | 0          | 0                 | 0          | 0      | 1         | 1      | N/A                     |
| IP               | P20700              | CPTC-LMNB1-2       | 4.10     | 1          | 1                 | 1          | 1      |           |        |                         |
| Negative Control | Q00987              | CPTC-MDM2-1        | 0.00     | 0          | 0                 | 0          | 0      | 0         | 0      | N/A                     |
| IP               | Q00987              | CPTC-MDM2-1        | 0.00     | 0          | 0                 | 0          | 0      |           |        |                         |
| Negative Control | O96013              | CPTC-PAK4-1        | 0.00     | 0          | 0                 | 0          | 0      | 1         | 1      | N/A                     |
| IP               | O96013              | CPTC-PAK4-1        | 3.05     | 1          | 1                 | 1          | 1      |           |        |                         |
| Negative Control | Q96ER3              | CPTC-SAAL1-1       | 0.00     | 0          | 0                 | 0          | 0      | 0         | 0      | N/A                     |
| IP               | Q96ER3              | CPTC-SAAL1-1       | 0.00     | 0          | 0                 | 0          | 0      |           |        |                         |
| Negative Control | P04637              | CPTC-TP53-1        | 0.00     | 0          | 0                 | 0          | 0      | 0         | 0      | N/A                     |
| IP               | P04637              | CPTC-TP53-1        | 0.00     | 0          | 0                 | 0          | 0      |           |        |                         |
| Negative Control | P04637              | CPTC-TP53-2        | 0.00     | 0          | 0                 | 0          | 0      | 0         | 0      | N/A                     |
| IP               | P04637              | CPTC-TP53-2        | 0.00     | 0          | 0                 | 0          | 0      |           |        |                         |
| Negative Control | Q12888              | CPTC-TP53BP1-1     | 8.27     | 1          | 11                | 11         | 12     | 1         | 1      | 1.1                     |
| IP               | Q12888              | CPTC-TP53BP1-1     | 9.58     | 1          | 12                | 12         | 13     |           |        |                         |

Table 11: Immuno-precipitation (IP) with HeLa cell lysates screening results – details

*Note: PSM ratio (IP/negative Control) below 1 has been indicated as negative; values of PMS ratio between 1 and 2 are considered weak; PSM ratio values above 2 have been assigned as positive*



| ID               | Antigen Accession # | CPTC Ab ID         | Coverage | # Proteins | # Unique Peptides | # Peptides | # PSMs | D peptide | D PSMs | PSM ratio (IP/Neg Ctrl) |
|------------------|---------------------|--------------------|----------|------------|-------------------|------------|--------|-----------|--------|-------------------------|
| Negative Control | P30305              | CPTC-CDC25B-1      | 0.00     | 0          | 0                 | 0          | 0      | 0         | 0      | N/A                     |
| IP               | P30305              | CPTC-CDC25B-1      | 0.00     | 0          | 0                 | 0          | 0      |           |        |                         |
| Negative Control | P06493              | CPTC-CDK1-1        | 0.00     | 0          | 0                 | 0          | 0      | 0         | 0      | N/A                     |
| IP               | P06493              | CPTC-CDK1-1        | 0.00     | 0          | 0                 | 0          | 0      |           |        |                         |
| Negative Control | P50613              | CPTC-CDK7-1        | 0.00     | 0          | 0                 | 0          | 0      | 0         | 0      | N/A                     |
| IP               | P50613              | CPTC-CDK7-1        | 0.00     | 0          | 0                 | 0          | 0      |           |        |                         |
| Negative Control | O14757              | CPTC-CHEK1-6       | 0.00     | 0          | 0                 | 0          | 0      | 0         | 0      | N/A                     |
| IP               | O14757              | CPTC-CHEK1-6       | 0.00     | 0          | 0                 | 0          | 0      |           |        |                         |
| Negative Control | O96017              | CPTC-CHEK2-2       | 0.00     | 0          | 0                 | 0          | 0      | 0         | 0      | N/A                     |
| IP               | O96017              | CPTC-CHEK2-2       | 0.00     | 0          | 0                 | 0          | 0      |           |        |                         |
| Negative Control | P04406              | CPTC-GAPDH-1       | 7.46     | 2          | 3                 | 3          | 3      | -1        | -1     | 0.7                     |
| IP               | P04406              | CPTC-GAPDH-1       | 6.57     | 2          | 2                 | 2          | 2      |           |        |                         |
| Negative Control | P04264              | CPTC-KRT Group A-1 | 40.68    | 1          | 25                | 30         | 34     | -3        | -3     | 0.9                     |
| IP               | P04264              | CPTC-KRT Group A-1 | 46.27    | 1          | 23                | 27         | 31     |           |        |                         |
| Negative Control | P05787              | CPTC-KRT Group B-1 | 61.90    | 11         | 34                | 40         | 60     | -5        | -16    | 0.7                     |
| IP               | P05787              | CPTC-KRT Group B-1 | 62.11    | 11         | 29                | 35         | 44     |           |        |                         |
| Negative Control | O43561              | CPTC-LAT-1         | 0.00     | 0          | 0                 | 0          | 0      | 0         | 0      | N/A                     |
| IP               | O43561              | CPTC-LAT-1         | 0.00     | 0          | 0                 | 0          | 0      |           |        |                         |
| Negative Control | P20700              | CPTC-LMNB1-2       | 0.00     | 0          | 0                 | 0          | 0      | 0         | 0      | N/A                     |
| IP               | P20700              | CPTC-LMNB1-2       | 0.00     | 0          | 0                 | 0          | 0      |           |        |                         |
| Negative Control | Q00987              | CPTC-MDM2-1        | 0.00     | 0          | 0                 | 0          | 0      | 0         | 0      | N/A                     |
| IP               | Q00987              | CPTC-MDM2-1        | 0.00     | 0          | 0                 | 0          | 0      |           |        |                         |
| Negative Control | O96013              | CPTC-PAK4-1        | 0.00     | 0          | 0                 | 0          | 0      | 0         | 0      | N/A                     |
| IP               | O96013              | CPTC-PAK4-1        | 0.00     | 0          | 0                 | 0          | 0      |           |        |                         |
| Negative Control | Q96ER3              | CPTC-SAAL1-1       | 0.00     | 0          | 0                 | 0          | 0      | 0         | 0      | N/A                     |
| IP               | Q96ER3              | CPTC-SAAL1-1       | 0.00     | 0          | 0                 | 0          | 0      |           |        |                         |
| Negative Control | P04637              | CPTC-TP53-1        | 0.00     | 0          | 0                 | 0          | 0      | 0         | 0      | N/A                     |
| IP               | P04637              | CPTC-TP53-1        | 0.00     | 0          | 0                 | 0          | 0      |           |        |                         |
| Negative Control | P04637              | CPTC-TP53-2        | 0.00     | 0          | 0                 | 0          | 0      | 0         | 0      | N/A                     |
| IP               | P04637              | CPTC-TP53-2        | 0.00     | 0          | 0                 | 0          | 0      |           |        |                         |
| Negative Control | Q12888              | CPTC-TP53BP1-1     | 0.00     | 0          | 0                 | 0          | 0      | 0         | 0      | N/A                     |
| IP               | Q12888              | CPTC-TP53BP1-1     | 0.00     | 0          | 0                 | 0          | 0      |           |        |                         |

Table 12: Immuno-precipitation (IP) with MCF10A cell lysates screening results – details

*Note: PSM ratio (IP/negative Control) below 1 has been indicated as negative; values of PMS ratio between 1 and 2 are considered weak; PSM ratio values above 2 have been assigned as positive*

| CPTC Antibody name | pH          |          | Antibody Dilutions |             |             |             |
|--------------------|-------------|----------|--------------------|-------------|-------------|-------------|
|                    | pH 6        | pH 9     | 50                 | 250         | 1250        | 6250        |
| CPTC-ACT Group-1   | Negative    | Negative | Negative           | Negative    | Negative    | Negative    |
| CPTC-CASP3-1       | Negative    | Negative | Negative           | Negative    | Negative    | Negative    |
| CPTC-CDC25B-1      | Negative    | Negative | Negative           | Negative    | Negative    | Negative    |
| CPTC-CDC25B-2      | Negative    | Negative | Negative           | Negative    | Negative    | Negative    |
| CPTC-CDC25C-1      | Not optimal | Positive | Positive           | Not optimal | Not optimal | Not optimal |
| CPTC-CDCA8-1       | Negative    | Negative | Negative           | Negative    | Negative    | Negative    |
| CPTC-CDK1-1        | Negative    | Negative | Negative           | Negative    | Negative    | Negative    |
| CPTC-CDK7-1        | Not optimal | Positive | Positive           | Not optimal | Not optimal | Not optimal |
| CPTC-CHEK1-6       | Negative    | Negative | Negative           | Negative    | Negative    | Negative    |
| CPTC-CHEK2-1       | Negative    | Negative | Negative           | Negative    | Negative    | Negative    |
| CPTC-CHEK2-2       | Negative    | Negative | Negative           | Negative    | Negative    | Negative    |
| CPTC-GAPDH-1       | Negative    | Negative | Negative           | Negative    | Negative    | Negative    |
| CPTC-KNL1-1        | Negative    | Negative | Negative           | Negative    | Negative    | Negative    |

Table 13. Immunohistochemistry screening results Part A.

| CPTC Antibody name | pH          |             | Antibody Dilutions |             |             |             |
|--------------------|-------------|-------------|--------------------|-------------|-------------|-------------|
|                    | pH 6        | pH 9        | 50                 | 250         | 1250        | 6250        |
| CPTC-KRT Group A-1 | Negative    | Negative    | Negative           | Negative    | Negative    | Negative    |
| CPTC-KRT Group B-1 | Positive    | Not optimal | Not optimal        | Positive    | Not optimal | Not optimal |
| CPTC-LAT-1         | Not optimal | Positive    | Not optimal        | Not optimal | Not optimal | Positive    |
| CPTC-LIME1-1       | Negative    | Negative    | Negative           | Negative    | Negative    | Negative    |
| CPTC-LMNB1-1       | Not optimal | Positive    | Positive           | Not optimal | Not optimal | Not optimal |
| CPTC-LMNB1-2       | Negative    | Negative    | Negative           | Negative    | Negative    | Negative    |
| CPTC-MCM6-1        | Negative    | Negative    | Negative           | Negative    | Negative    | Negative    |
| CPTC-MDM2-1        | Negative    | Negative    | Negative           | Negative    | Negative    | Negative    |
| CPTC-MKI67-3       | Positive    | Not optimal | Not optimal        | Not optimal | Not optimal | Positive    |
| CPTC-MKI67-4       | Not optimal | Positive    | Not optimal        | Not optimal | Positive    | Not optimal |
| CPTC-MRE11A-1      | Positive    | Not optimal | Not optimal        | Positive    | Not optimal | Not optimal |
| CPTC-NCAPH2-1      | Not optimal | Positive    | Positive           | Not optimal | Not optimal | Not optimal |

Table 14. Immunohistochemistry screening results Part B.

| CPTC Antibody name | pH          |             | Antibody Dilutions |             |             |             |
|--------------------|-------------|-------------|--------------------|-------------|-------------|-------------|
|                    | pH 6        | pH 9        | 50                 | 250         | 1250        | 6250        |
| CPTC-NUMA1-1       | Positive    | Not optimal | Not optimal        | Not optimal | Positive    | Not optimal |
| CPTC-PAK4-1        | Positive    | Not optimal | Positive           | Not optimal | Not optimal | Not optimal |
| CPTC-PARP1-2       | Negative    | Negative    | Negative           | Negative    | Negative    | Negative    |
| CPTC-RAD50-2       | Negative    | Negative    | Negative           | Negative    | Negative    | Negative    |
| CPTC-RAD9A-1       | Negative    | Negative    | Negative           | Negative    | Negative    | Negative    |
| CPTC-RTF1-1        | Not optimal | Positive    | Not optimal        | Not optimal | Positive    | Not optimal |
| CPTC-RTF1-2        | Positive    | Not optimal | Positive           | Not optimal | Not optimal | Not optimal |
| CPTC-SAAL1-1       | Negative    | Negative    | Negative           | Negative    | Negative    | Negative    |
| CPTCTNFRSF17-1     | Negative    | Negative    | Negative           | Negative    | Negative    | Negative    |
| CPTC-TP53-1        | Negative    | Negative    | Negative           | Negative    | Negative    | Negative    |
| CPTC-TP53-2        | Positive    | Not optimal | Not optimal        | Positive    | Not optimal | Not optimal |
| CPTC-TP53BP1-1     | Not optimal | Positive    | Not optimal        | Not optimal | Positive    | Not optimal |
| CPTC-TUBB-1        | Negative    | Negative    | Negative           | Negative    | Negative    | Negative    |
| CPTC-UTP14A-1      | Not optimal | Positive    | Not optimal        | Not optimal | Not optimal | Positive    |

Table 15. Immunohistochemistry screening results Part C.

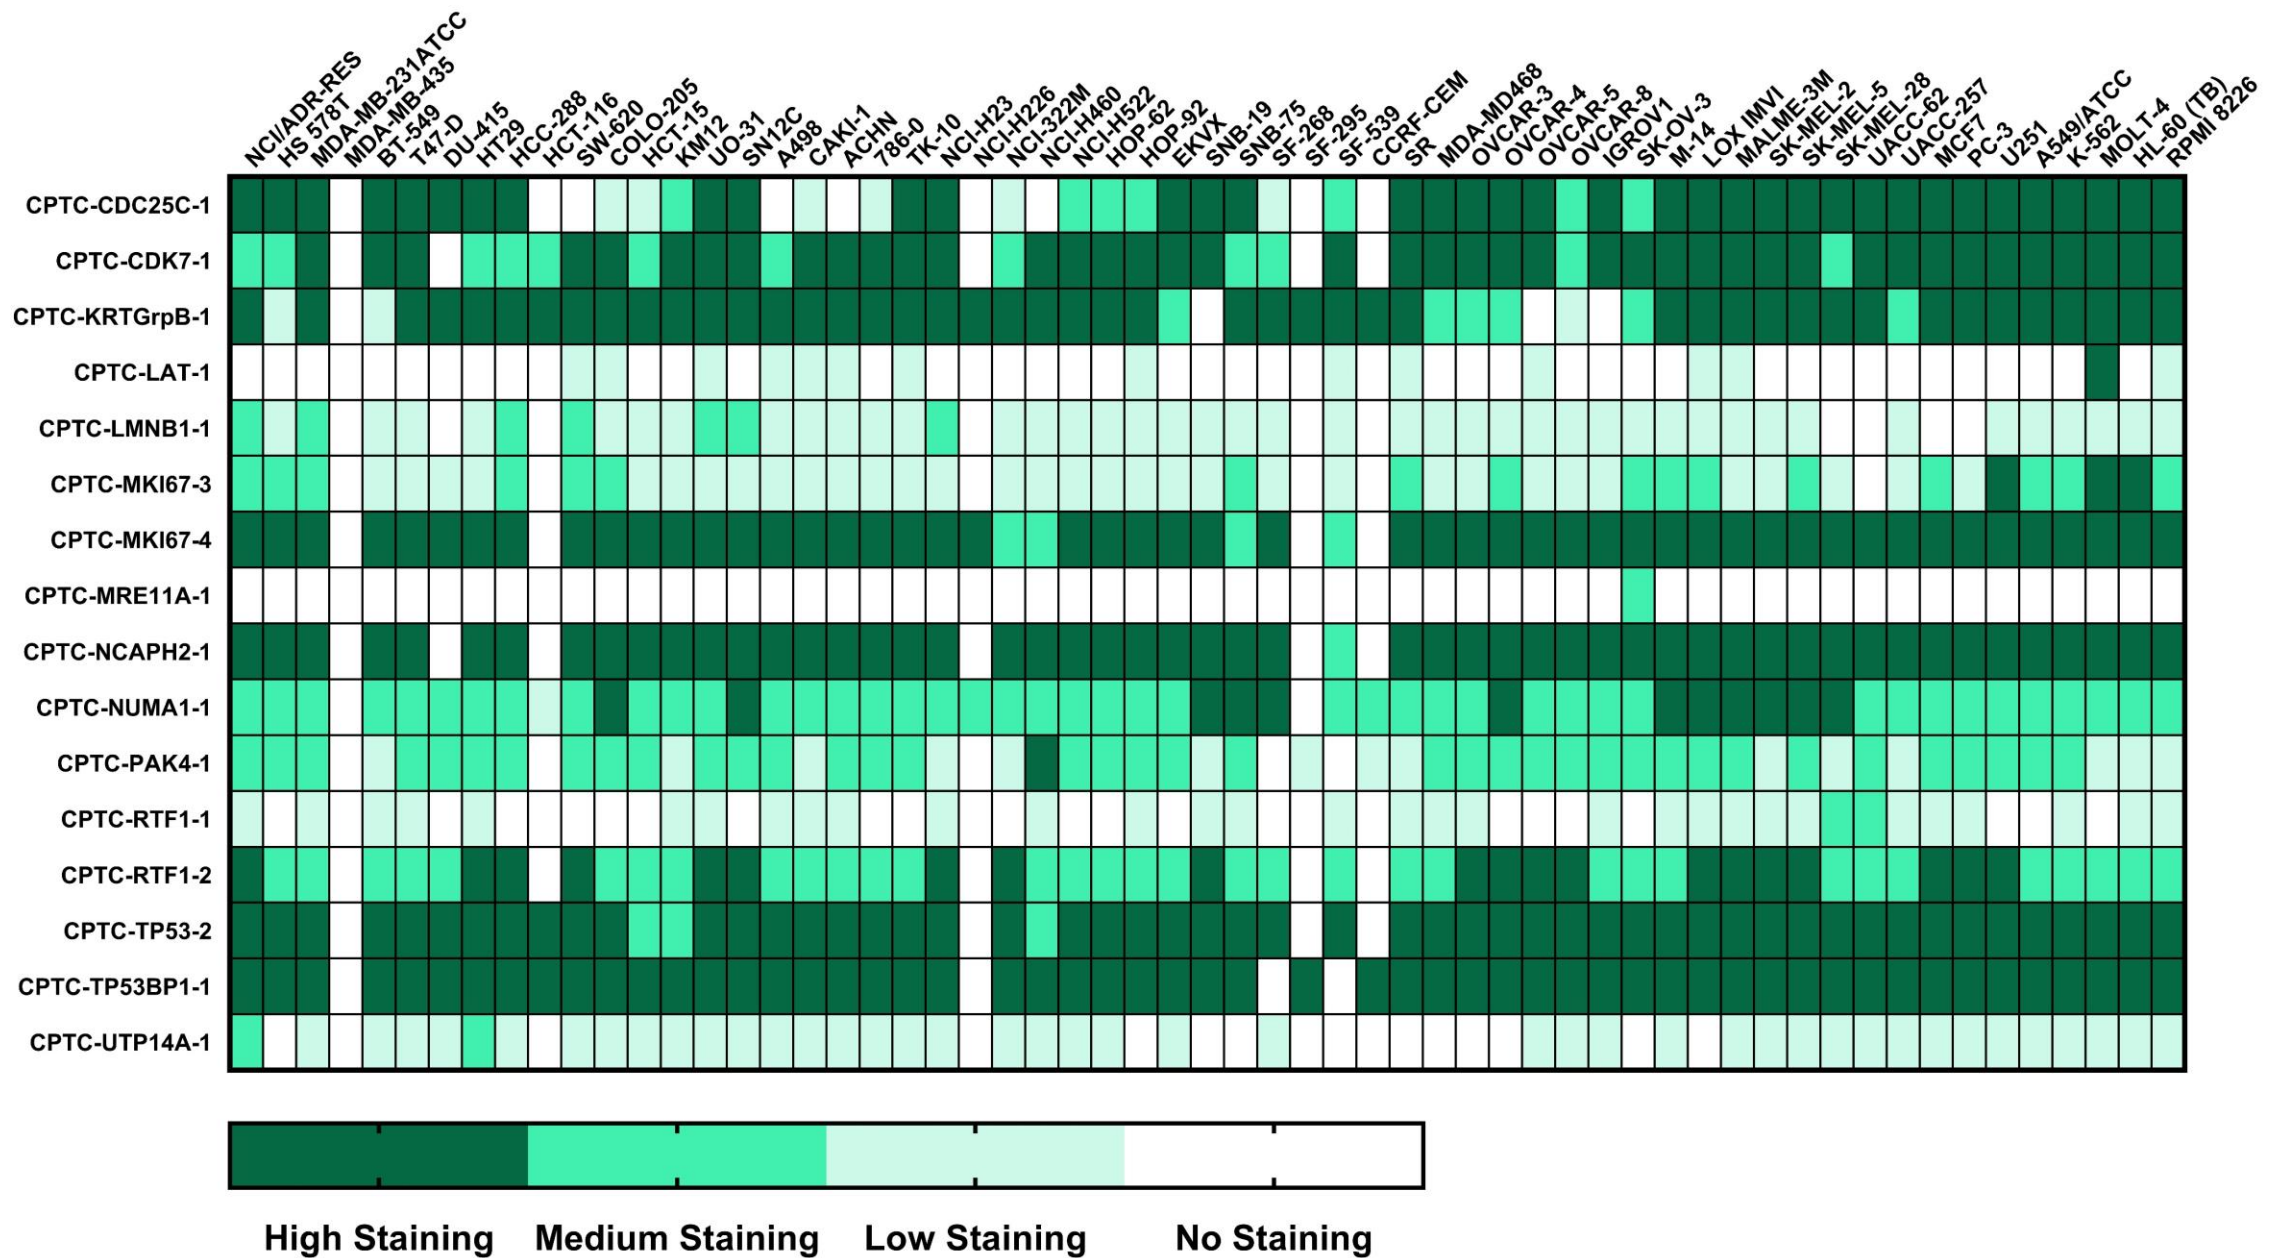

## D. Results

|                             |          |
|-----------------------------|----------|
| 1. CPTC-ACT Group 1.....    | Page 29  |
| 2. CPTC-CASP3-1.....        | Page 30  |
| 3. CPTC-CDC25B-1.....       | Page 32  |
| 4. CPTC CDC25B-2.....       | Page 36  |
| 5. CPTC-CDC25C-1 .....      | Page 38  |
| 6. CPTC-CDCA8-1 .....       | Page 41  |
| 7. CPTC-CDK1-1 .....        | Page 43  |
| 8. CPTC-CDK7-1 .....        | Page 52  |
| 9. CPTC-CHEK1-6 .....       | Page 59  |
| 10. CPTC-CHEK2-1 .....      | Page 63  |
| 11. CPTC-CHEK2-2 .....      | Page 65  |
| 12. CPTC-GAPDH-1 .....      | Page 69  |
| 13. CPTC-KNL1-1 .....       | Page 75  |
| 14. CPTC-KRT Group A-1..... | Page 77  |
| 15. CPTC-KRT Group B-1..... | Page 84  |
| 16. CPTC-LAT-1.....         | Page 90  |
| 17. CPTC-LIME1-1 .....      | Page 94  |
| 18. CPTC-LMNB1-1 .....      | Page 96  |
| 19. CPTC-LMNB1-2 .....      | Page 99  |
| 20. CPTC-MCM6-1 .....       | Page 106 |

## D. Results

|                           |          |
|---------------------------|----------|
| 21. CPTC-MDM2-1.....      | Page 108 |
| 22. CPTC-MKI67-3.....     | Page 115 |
| 23. CPTC-MKI67-4.....     | Page 118 |
| 24. CPTC-MRE11A-1.....    | Page 121 |
| 25. CPTC-NCAPH2-1.....    | Page 124 |
| 26. CPTC-NUMA1-1.....     | Page 127 |
| 27. CPTC-PAK4-1.....      | Page 131 |
| 28. PTC-PARP1-2.....      | Page 136 |
| 29. CPTC-RAD50-2 .....    | Page 138 |
| 30. CPTC-RAD9A-1.....     | Page 140 |
| 31. CPTC-RTF1-1.....      | Page 142 |
| 32. CPTC-RTF1-2.....      | Page 145 |
| 33. CPTC-SAAL1-1 .....    | Page 148 |
| 34. CPTC-TNFRSF17-1 ..... | Page 152 |
| 35. CPTC-TP53-1 .....     | Page 154 |
| 36. CPTC-TP53-2 .....     | Page 160 |
| 37. CPTC-TP53BP1-1 .....  | Page 168 |
| 38. CPTC-TUBB-1 .....     | Page 175 |
| 39. CPTC-UTP14A-1 .....   | Page 176 |

## Notes

1. The expected molecular weight and subcellular localization data used in this report were derived from The Universal Protein Resource (UniProt) database ([uniport.org](http://uniport.org)).
2. The observed molecular weight of the protein may vary from the listed predicted molecular weight due to post translational modifications, post translation cleavages, relative charges, and other experimental factors.



## 1. CPTC-ACT Group-1

| Technique | Analyte | Result    |
|-----------|---------|-----------|
| WB        | RecProt | <b>N*</b> |
| Wes       | HeLa    | <b>NT</b> |
|           | MCF10A  | <b>NT</b> |
|           | LCL57   | <b>NT</b> |
| WB        | HeLa    | <b>NT</b> |
|           | MCF10A  | <b>NT</b> |
|           | LCL57   | <b>NT</b> |
| IF        | HeLa    | <b>NT</b> |
|           | MCF10A  | <b>NT</b> |
|           | LCL57   | <b>NT</b> |
| SCWB      | HeLa    | <b>NT</b> |
|           | MCF10A  | <b>NT</b> |
|           | LCL57   | <b>NT</b> |
| IP        | RecProt | <b>NT</b> |
| IP        | HeLa    | <b>NT</b> |
|           | MCF10A  | <b>NT</b> |
|           | LCL57   | <b>NT</b> |
| IHC       |         | <b>N*</b> |
| NCI60     |         | <b>NT</b> |

N – Negative, NT – Not tested, \* Data not shown

## 2. CPTC-CASP3-1

| Technique | Analyte | Result    |
|-----------|---------|-----------|
| WB        | RecProt | <b>N*</b> |
| West†     | HeLa    | <b>N</b>  |
|           | MCF10A  | <b>N</b>  |
|           | LCL57   | <b>N</b>  |
| WB        | HeLa    | <b>NT</b> |
|           | MCF10A  | <b>NT</b> |
|           | LCL57   | <b>NT</b> |
| IF        | HeLa    | <b>NT</b> |
|           | MCF10A  | <b>NT</b> |
|           | LCL57   | <b>NT</b> |
| SCWB      | HeLa    | <b>NT</b> |
|           | MCF10A  | <b>NT</b> |
|           | LCL57   | <b>NT</b> |
| IP        | RecProt | <b>NT</b> |
| IP        | HeLa    | <b>NT</b> |
|           | MCF10A  | <b>NT</b> |
|           | LCL57   | <b>NT</b> |
| IHC       |         | <b>N*</b> |
| NCI60     |         | <b>NT</b> |

N – Negative, NT – Not Tested, \* Data not shown

† Data shown are from the Phospho-specificity Experiment.

# Endogenous Wes

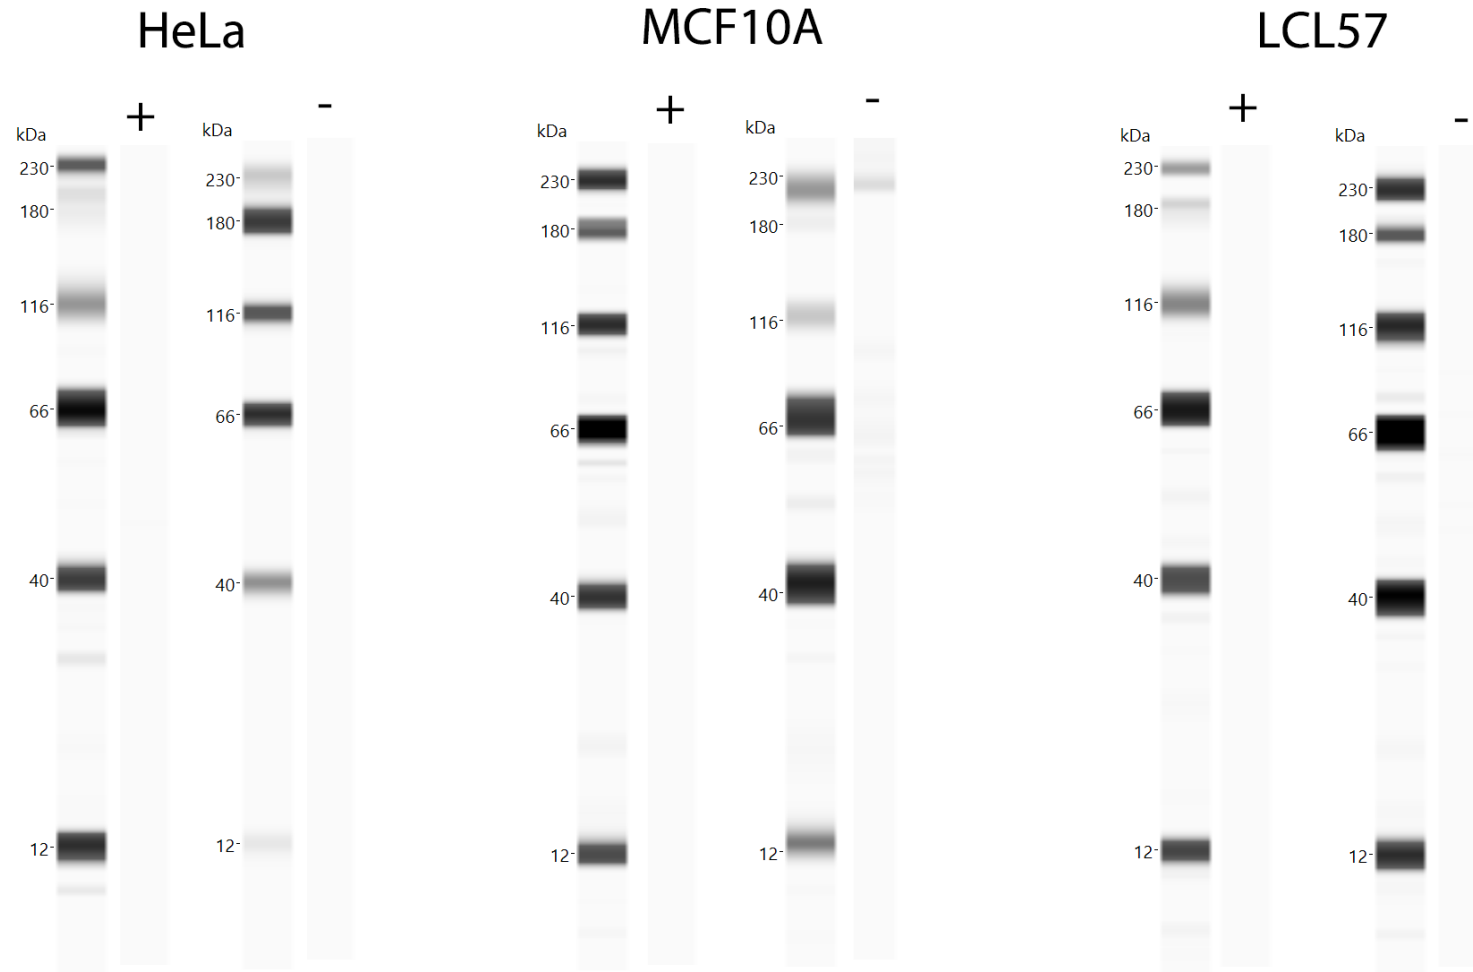

Expected molecular weight: 32 kDa

+ : irradiation treated cells  
- : not treated cells

### 3. CPTC-CDC25B-1

| Technique | Analyte | Result |
|-----------|---------|--------|
| WB        | RecProt | P      |
| Wes       | HeLa    | N      |
|           | MCF10A  | N      |
|           | LCL57   | N      |
| WB        | HeLa    | P      |
|           | MCF10A  | P      |
|           | LCL57   | P      |
| IF        | HeLa    | N†     |
|           | MCF10A  | N†     |
|           | LCL57   | P      |
| SCWB      | HeLa    | N      |
|           | MCF10A  | N      |
|           | LCL57   | N      |
| IP*       | RecProt | P      |
| IP*       | HeLa    | N      |
|           | MCF10A  | N      |
|           | LCL57   | N      |
| IHC       |         | N†     |
| NCI60     |         | NT     |

P – Positive, N – Negative, \* Please refer to tables for results, † Data not shown

# WB against commercial recombinant protein

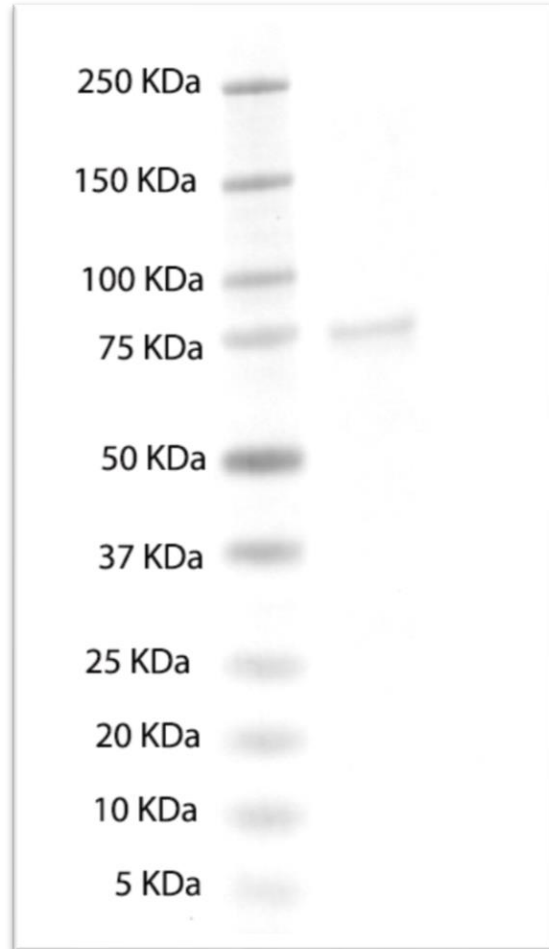

Ag Vendor: Origene

Cat #: LY402883

Description: CDC25B (NM\_021873) Human Over-expression Lysate (Transient overexpression lysate of cell division cycle 25 homolog B (S. pombe) (CDC25B), transcript variant 1)

Predicted MW 65 KDa

## Endogenous WB

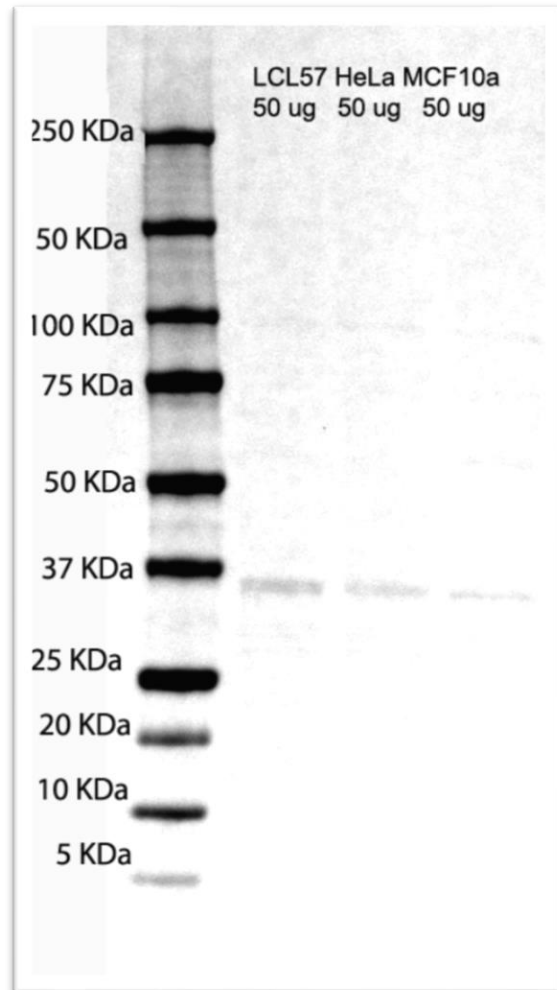

## Endogenous Wes

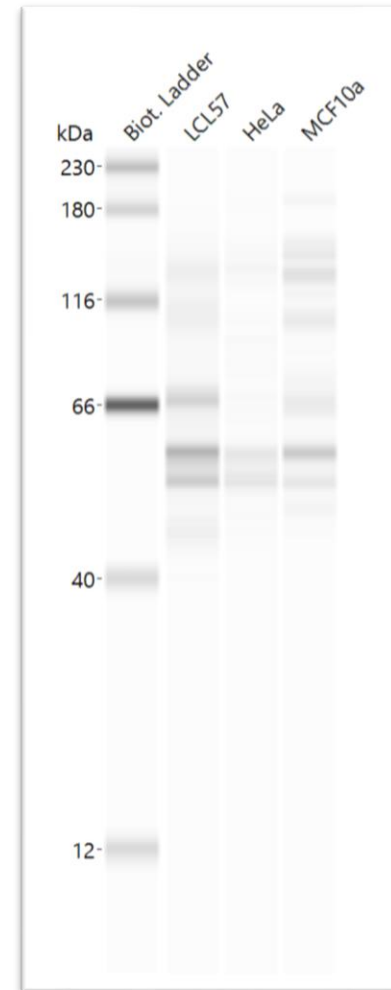

# Immunofluorescence – LCL57

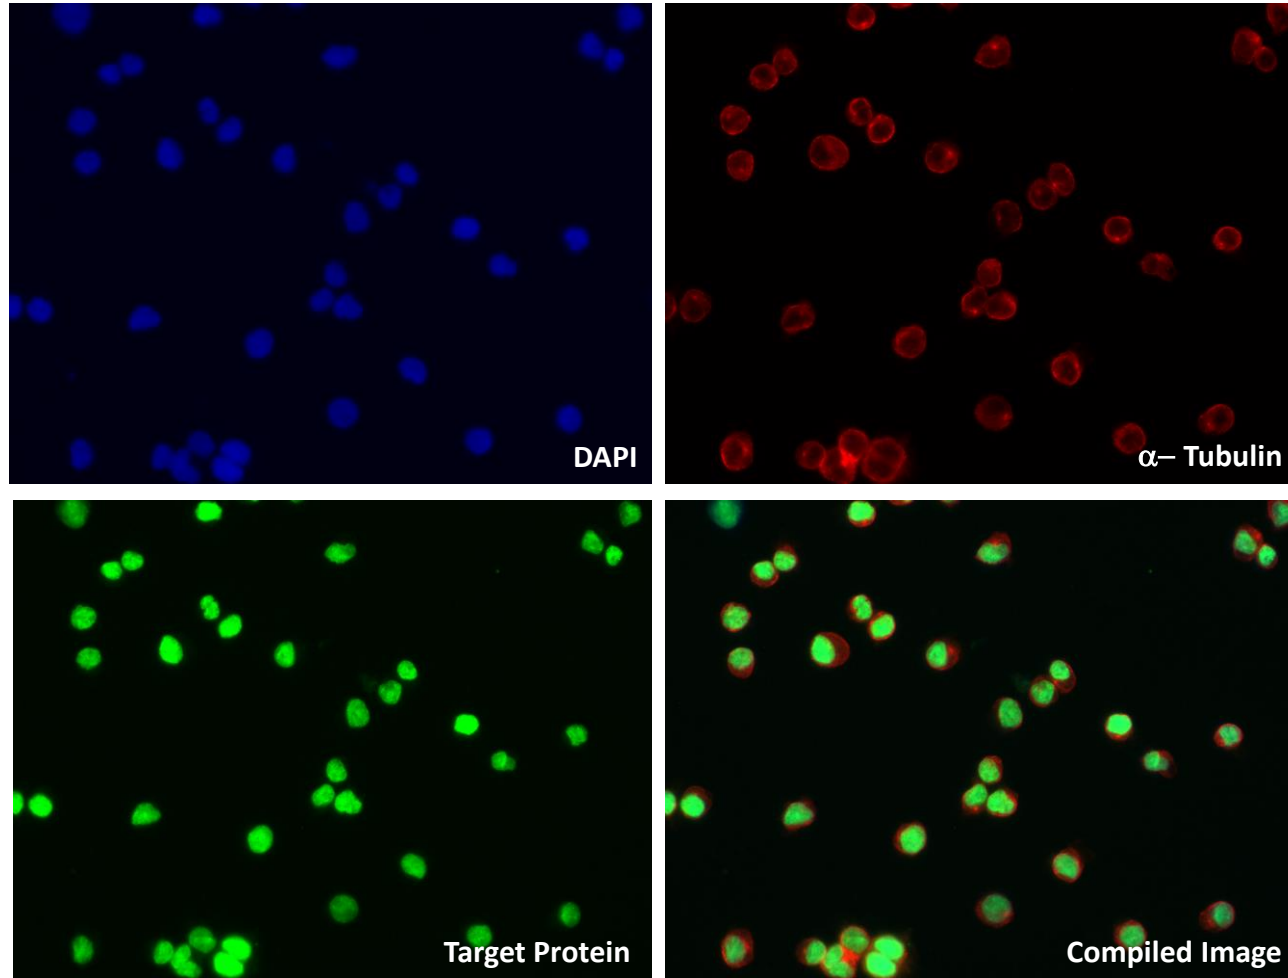

Subcellular location: Cytoskeleton

## 4. CPTC-CDC25B-2

| Technique | Analyte | Result    |
|-----------|---------|-----------|
| WB        | RecProt | <b>N*</b> |
| West†     | HeLa    | <b>N</b>  |
|           | MCF10A  | <b>N</b>  |
|           | LCL57   | <b>N</b>  |
| WB        | HeLa    | <b>NT</b> |
|           | MCF10A  | <b>NT</b> |
|           | LCL57   | <b>NT</b> |
| IF        | HeLa    | <b>NT</b> |
|           | MCF10A  | <b>NT</b> |
|           | LCL57   | <b>NT</b> |
| SCWB      | HeLa    | <b>NT</b> |
|           | MCF10A  | <b>NT</b> |
|           | LCL57   | <b>NT</b> |
| IP        | RecProt | <b>NT</b> |
| IP        | HeLa    | <b>NT</b> |
|           | MCF10A  | <b>NT</b> |
|           | LCL57   | <b>NT</b> |
| IHC       |         | <b>N*</b> |
| NCI60     |         | <b>NT</b> |

N – Negative, NT – Not Tested, \*Data not shown

†Data shown are from Phospho-specificity Experiment



# Endogenous Wes

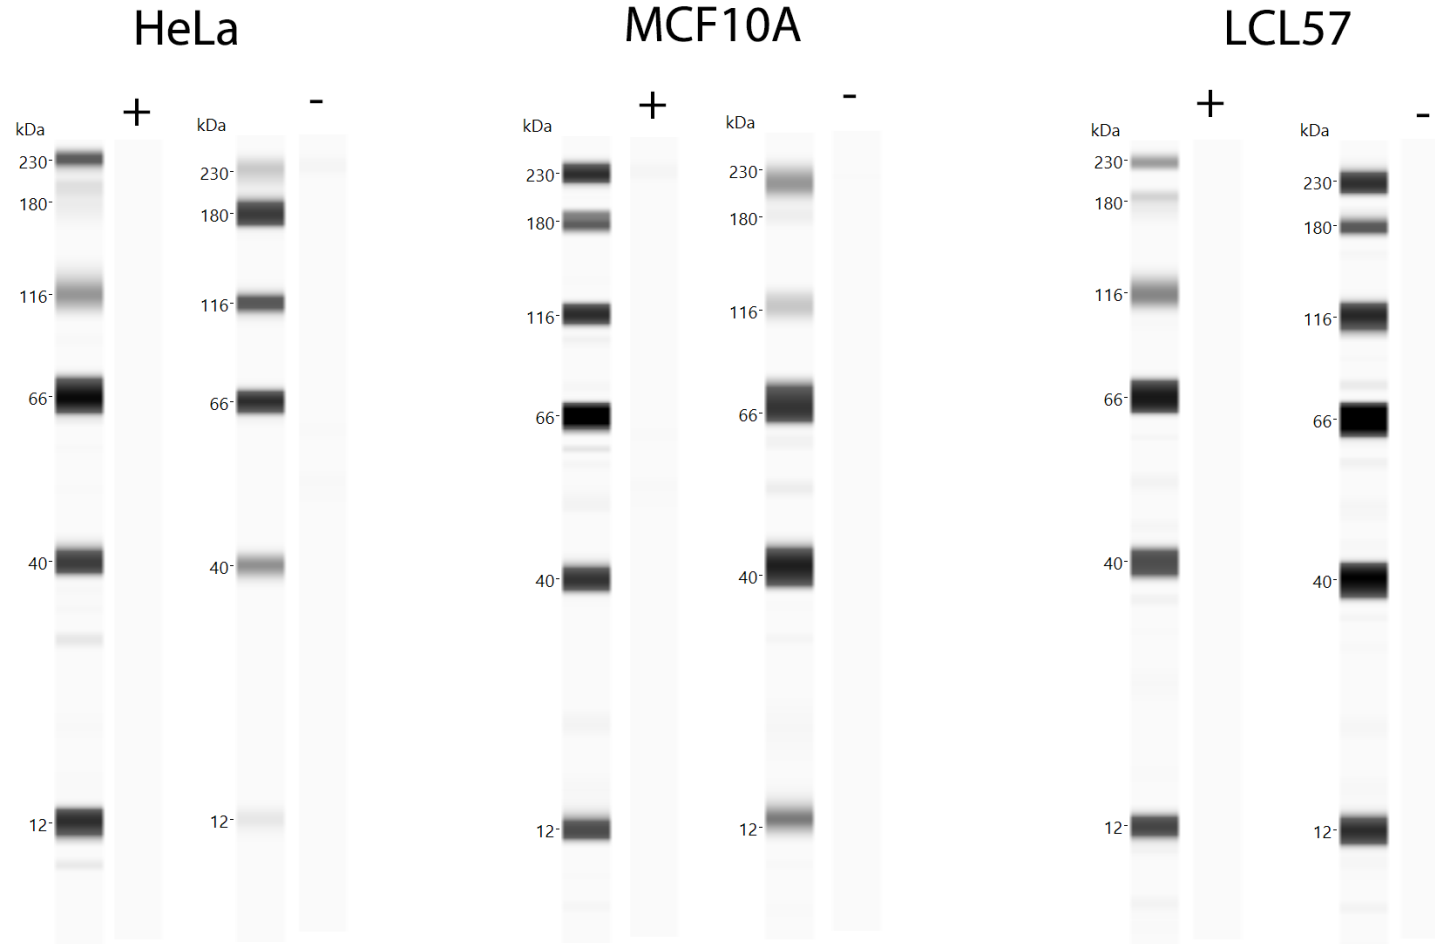

Expected molecular weight: 65, 63, 61, 67 kDa

+ : irradiation treated cells  
- : not treated cells

## 5. CPTC-CDC25C-1

| Technique | Analyte | Result    |
|-----------|---------|-----------|
| WB        | RecProt | <b>N*</b> |
| West†     | HeLa    | <b>N</b>  |
|           | MCF10A  | <b>N</b>  |
|           | LCL57   | <b>N</b>  |
| WB        | HeLa    | <b>NT</b> |
|           | MCF10A  | <b>NT</b> |
|           | LCL57   | <b>NT</b> |
| IF        | HeLa    | <b>NT</b> |
|           | MCF10A  | <b>NT</b> |
|           | LCL57   | <b>NT</b> |
| SCWB      | HeLa    | <b>NT</b> |
|           | MCF10A  | <b>NT</b> |
|           | LCL57   | <b>NT</b> |
| IP        | RecProt | <b>NT</b> |
| IP        | HeLa    | <b>NT</b> |
|           | MCF10A  | <b>NT</b> |
|           | LCL57   | <b>NT</b> |
| IHC       |         | <b>P</b>  |
| NCI60     |         | <b>P</b>  |

N – Negative, NT – Not Tested, \*Data not shown

†Data shown are from Phospho-specificity Experiment

# Endogenous Wes

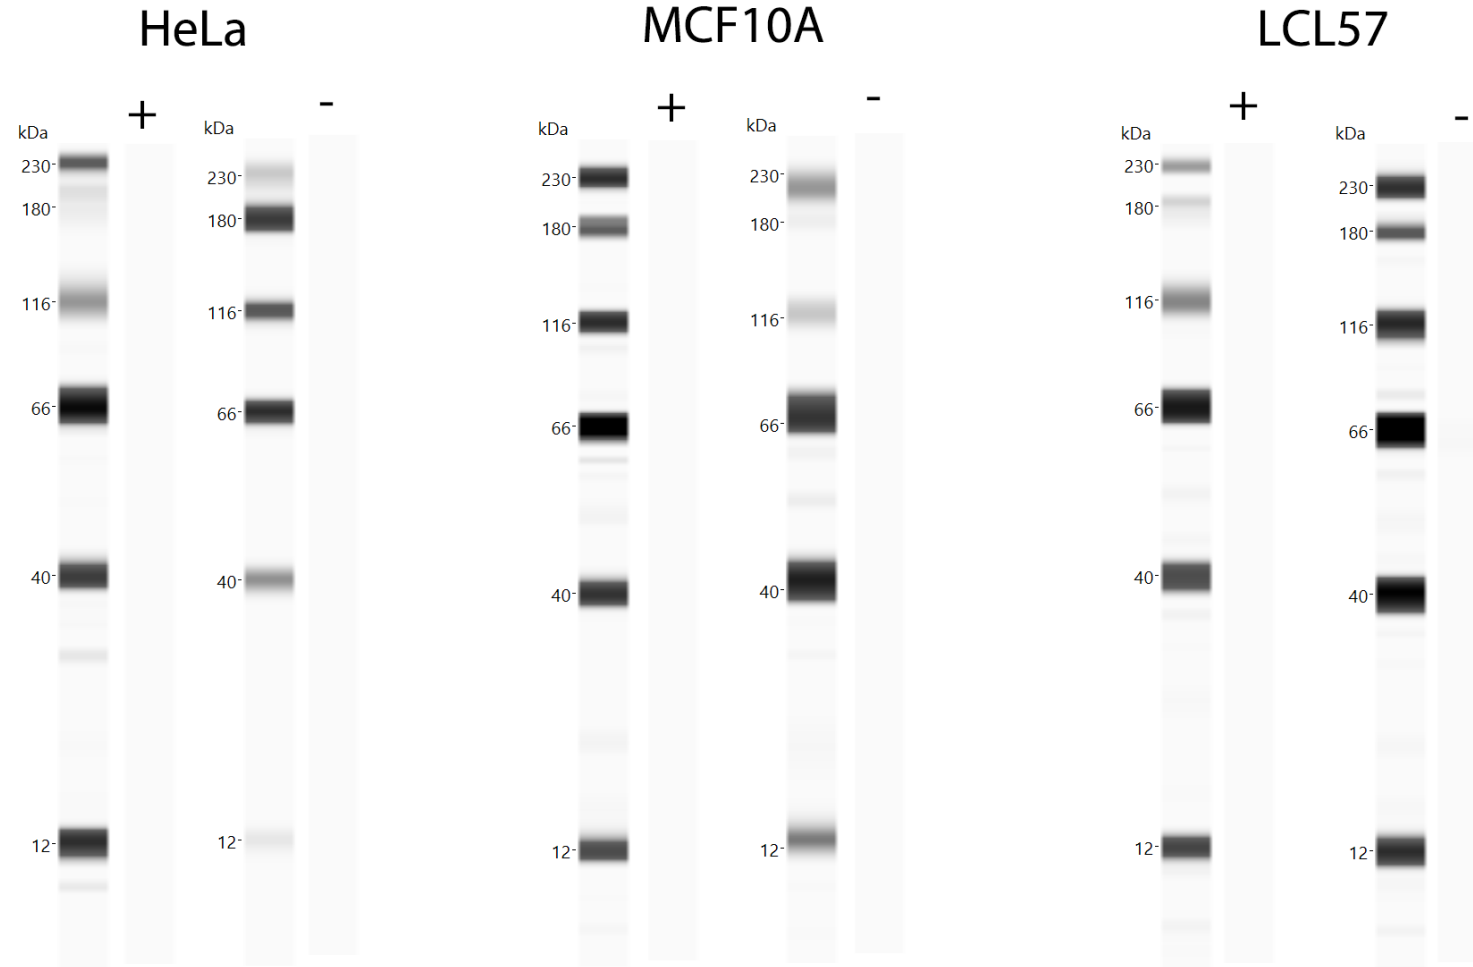

Expected molecular weight: 53, 50, 49, 46 kDa

+ : irradiation treated cells  
- : not treated cells

# CPTC- CDC25C-1

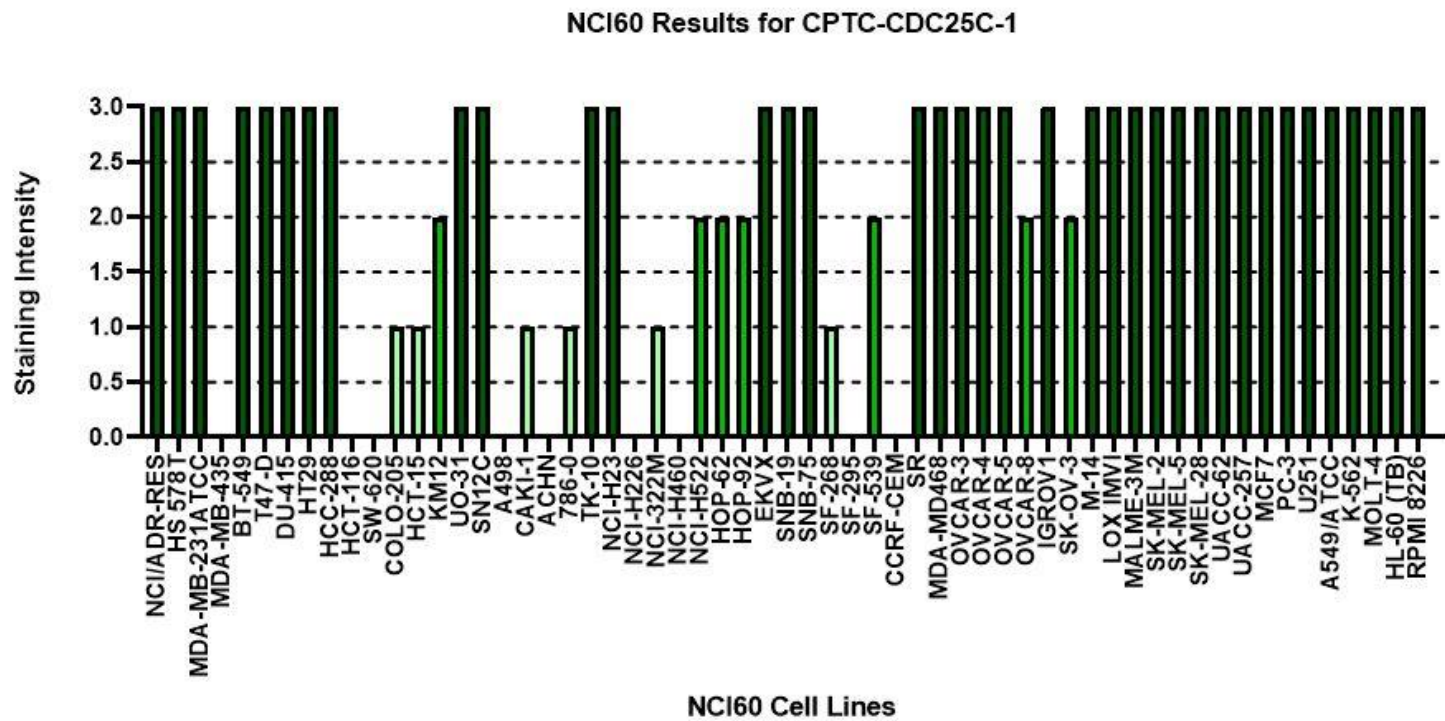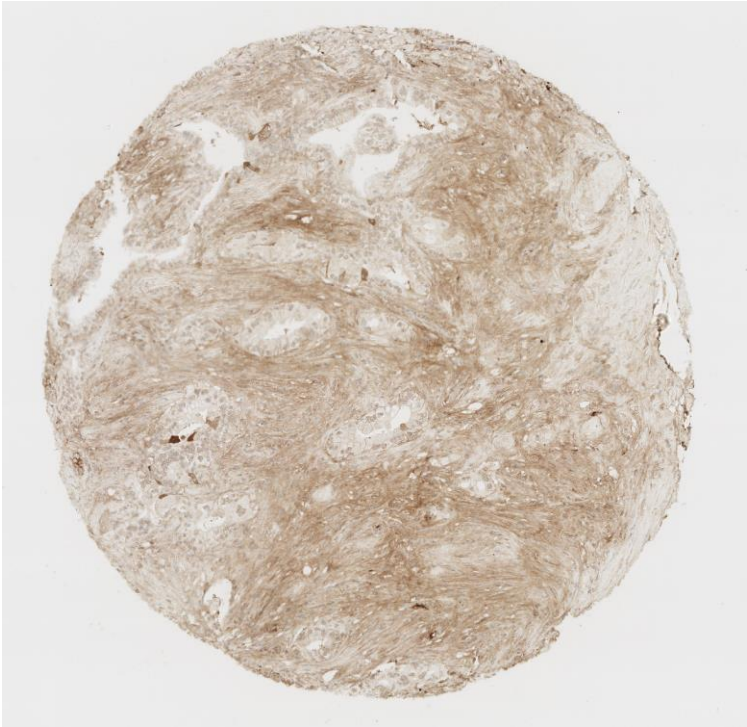

6. CPTC-CDCA8-1

| Technique | Analyte | Result |
|-----------|---------|--------|
| WB        | RecProt | N*     |
| West†     | HeLa    | N      |
|           | MCF10A  | N      |
|           | LCL57   | N      |
| WB        | HeLa    | NT     |
|           | MCF10A  | NT     |
|           | LCL57   | NT     |
| IF        | HeLa    | NT     |
|           | MCF10A  | NT     |
|           | LCL57   | NT     |
| SCWB      | HeLa    | NT     |
|           | MCF10A  | NT     |
|           | LCL57   | NT     |
| IP        | RecProt | NT     |
| IP        | HeLa    | NT     |
|           | MCF10A  | NT     |
|           | LCL57   | NT     |
| IHC       |         | N*     |
| NCI60     |         | NT     |

N – Negative, NT – Not Tested, \*Data not shown  
†Data shown are from Phospho-specificity Experiment

# Endogenous Wes

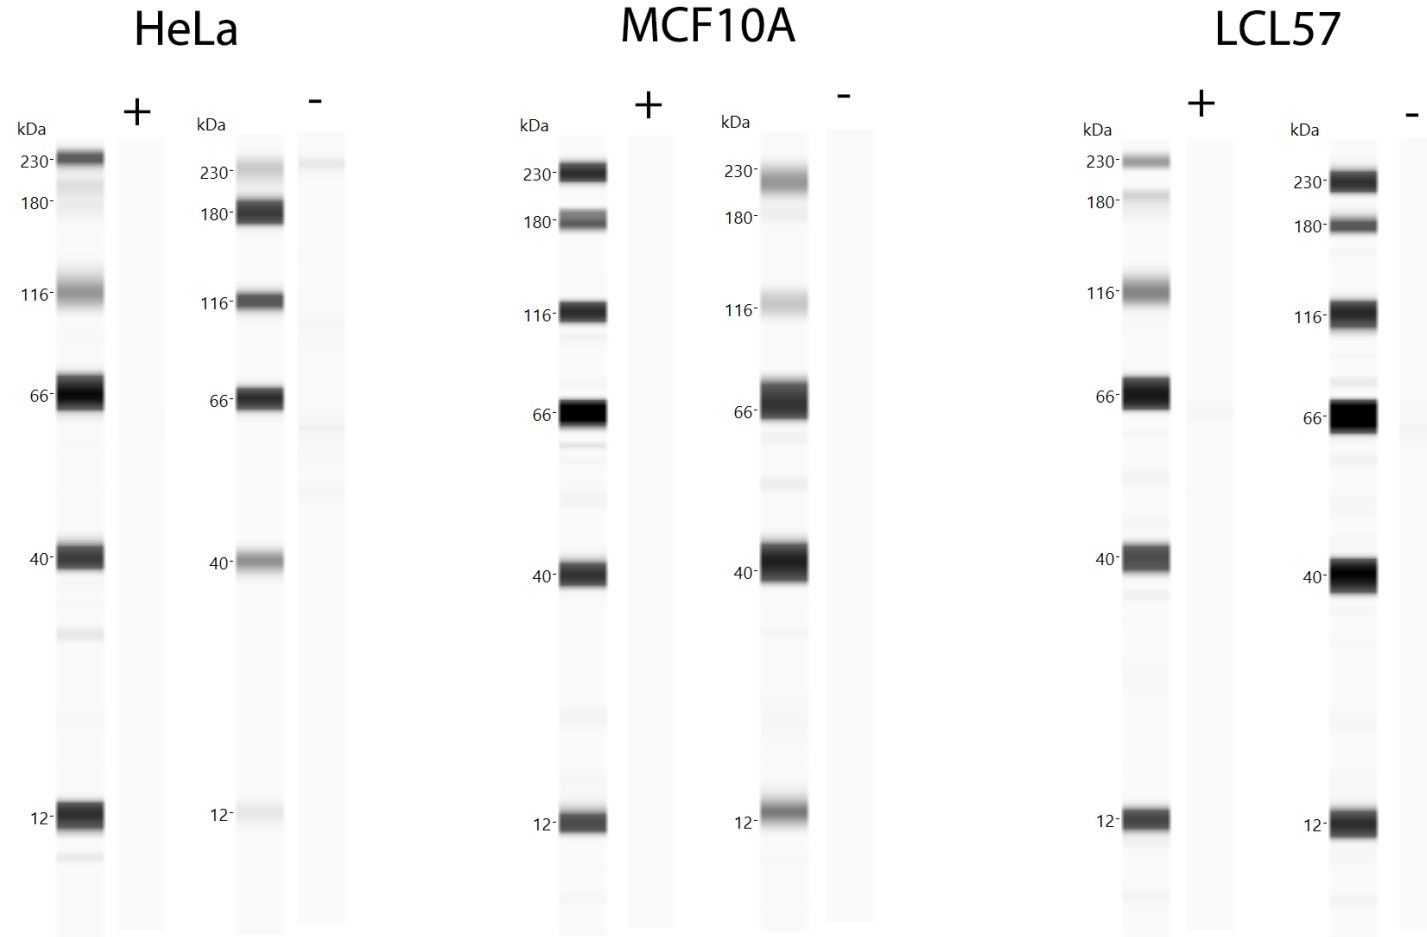

Expected molecular weight: 31 kDa

+ : irradiation treated cells  
- : not treated cells

## 7. CPTC-CDK1-1

| Technique | Analyte | Result |
|-----------|---------|--------|
| WB        | RecProt | P      |
| Wes       | HeLa    | P      |
|           | MCF10A  | P      |
|           | LCL57   | P      |
| WB        | HeLa    | P      |
|           | MCF10A  | P      |
|           | LCL57   | P      |
| IF        | HeLa    | P      |
|           | MCF10A  | P      |
|           | LCL57   | P      |
| SCWB      | HeLa    | P      |
|           | MCF10A  | P      |
|           | LCL57   | P      |
| IP*       | RecProt | W      |
| IP*       | HeLa    | N      |
|           | MCF10A  | N      |
|           | LCL57   | N      |
| IHC       |         | N†     |
| NCI60     |         | NT     |

P – Positive, N – Negative, W – Weak, \* Please refer to tables for results, †Data not shown

# WB against commercial recombinant protein

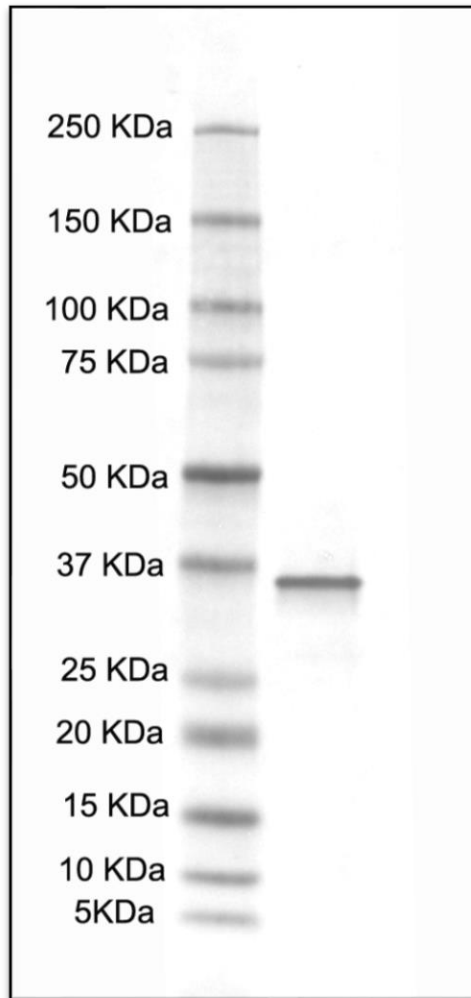

Ag Vendor: Origene

Cat #: TP300495

Description: CDK1 (NM\_001786) Human Recombinant Protein  
Recombinant protein of human cell division cycle 2, G1 to S and G2 to M (CDC2), transcript variant 1n

Predicted MW 33.9 KDa



## Endogenous WB

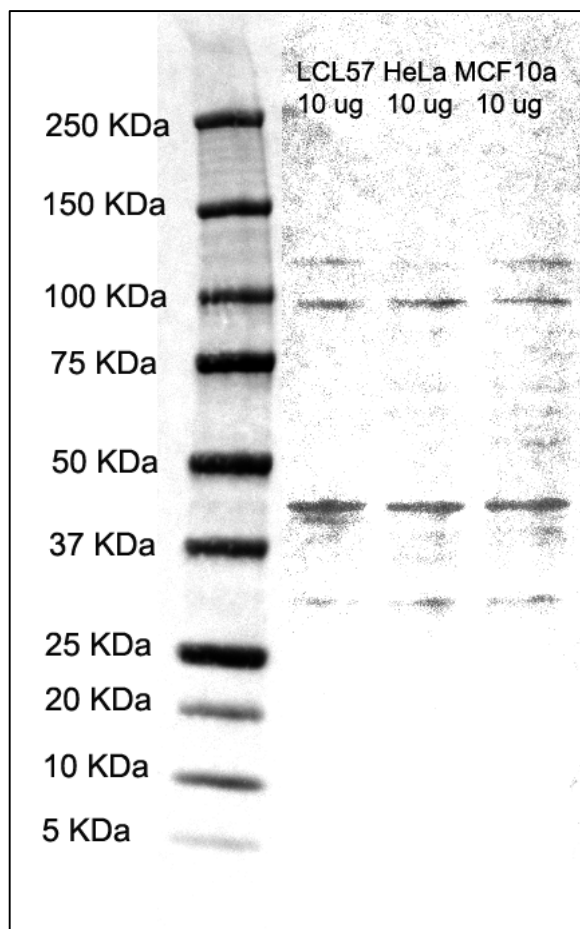

## Endogenous Wes

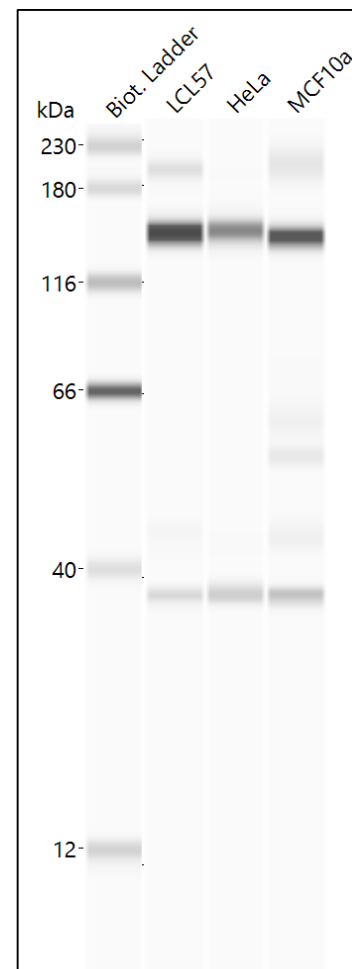

# Immunofluorescence – HeLa

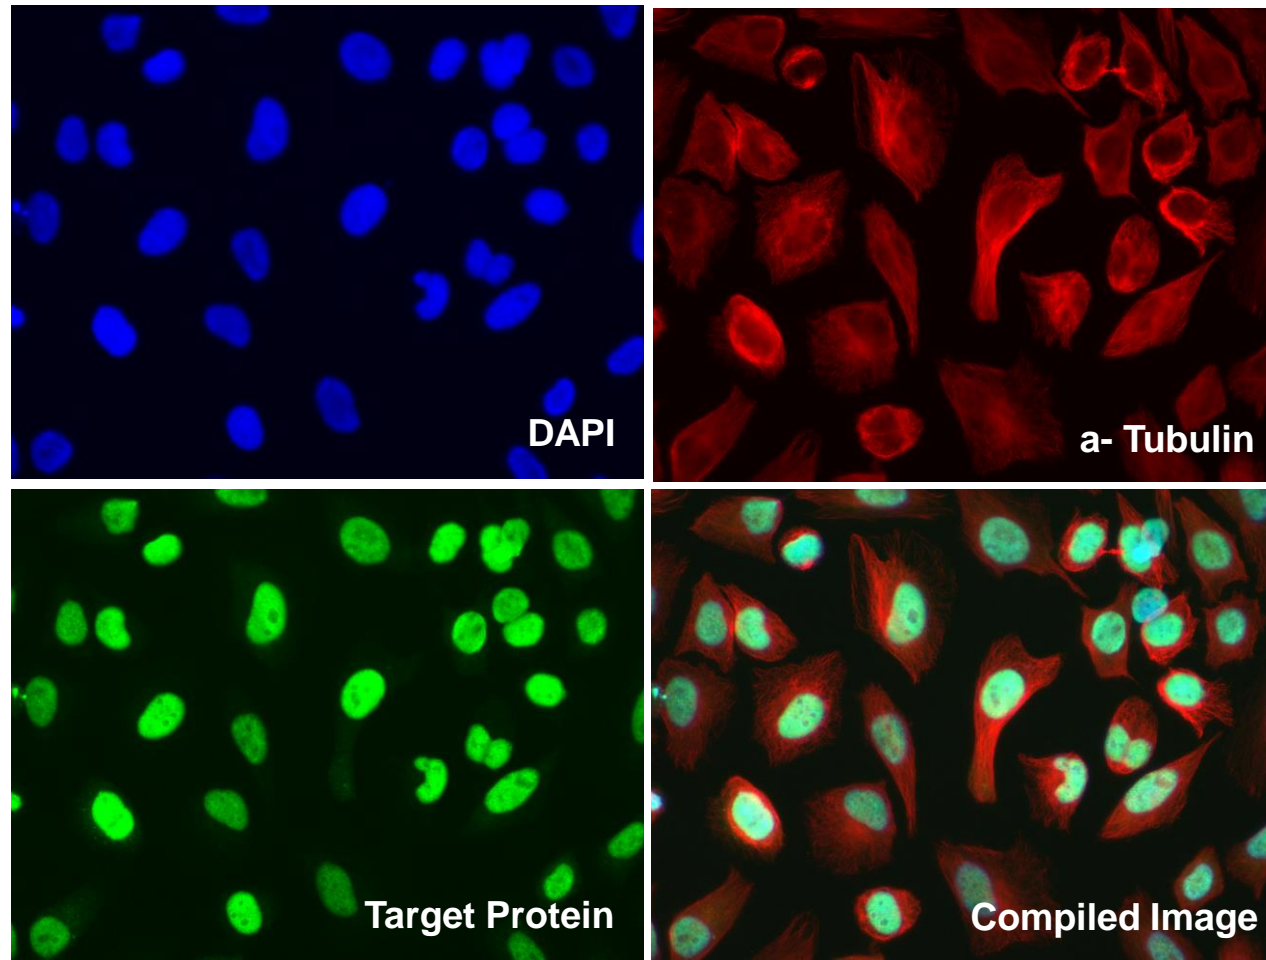

Subcellular Locations: Mitochondrion, Nucleus, Cytoskeleton, Other

## Immunofluorescence – MCF10A

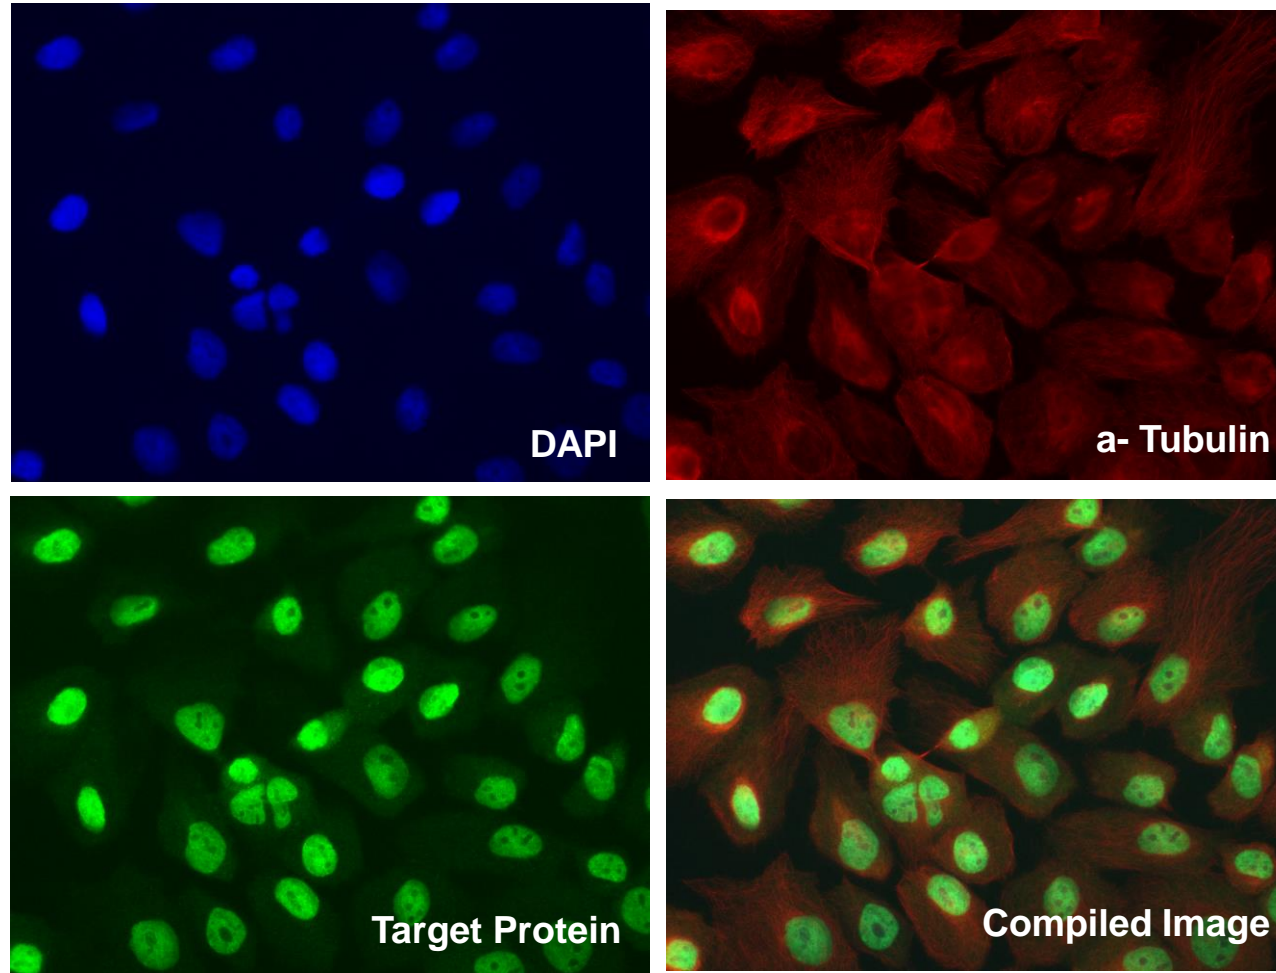

Subcellular Locations: Mitochondrion, Nucleus, Cytoskeleton, Other

# Immunofluorescence – LCL57

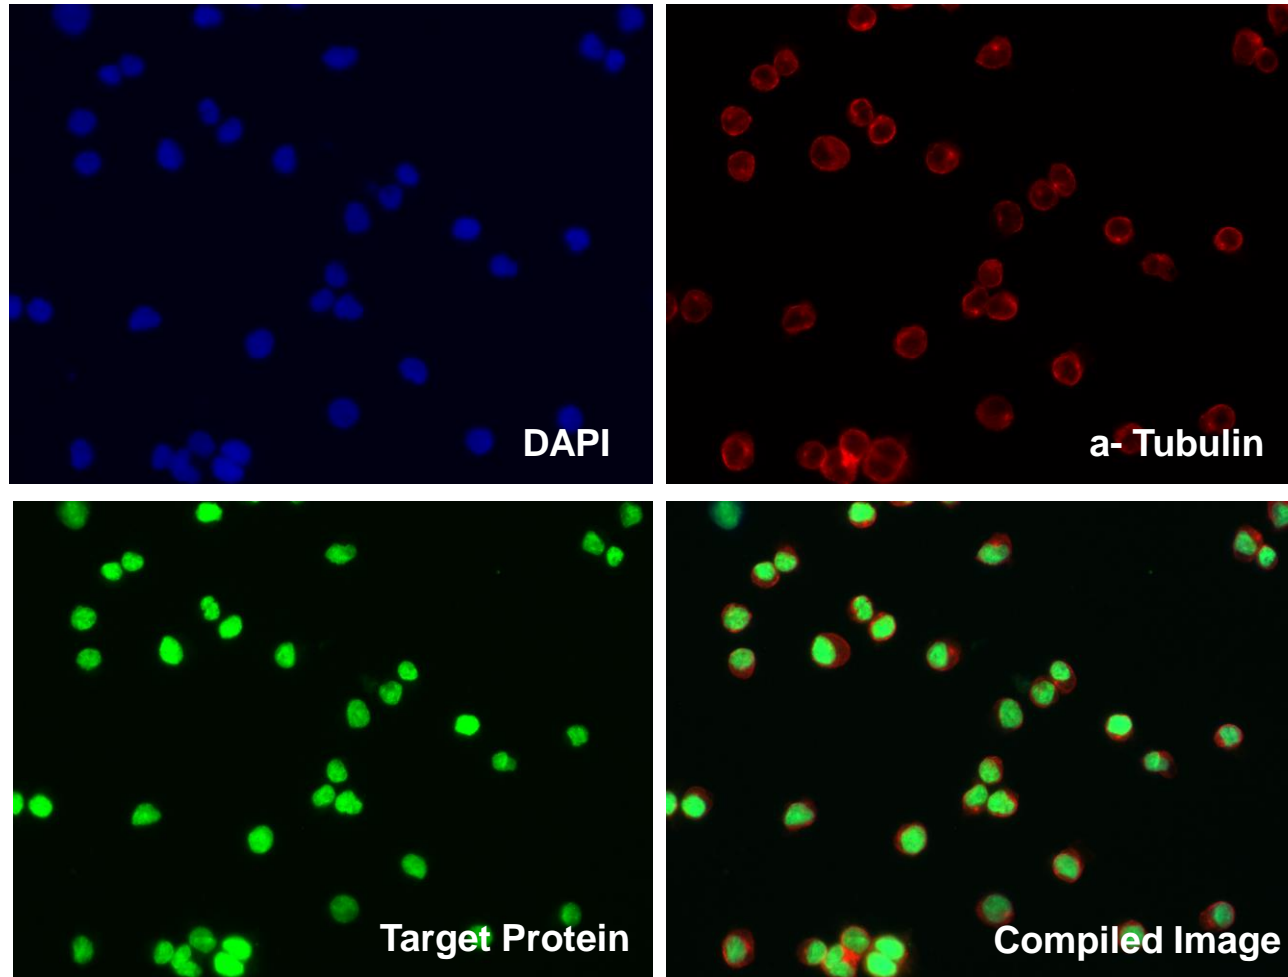

Subcellular Locations: Mitochondrion, Nucleus, Cytoskeleton, Other

# Single Cell Western Blot

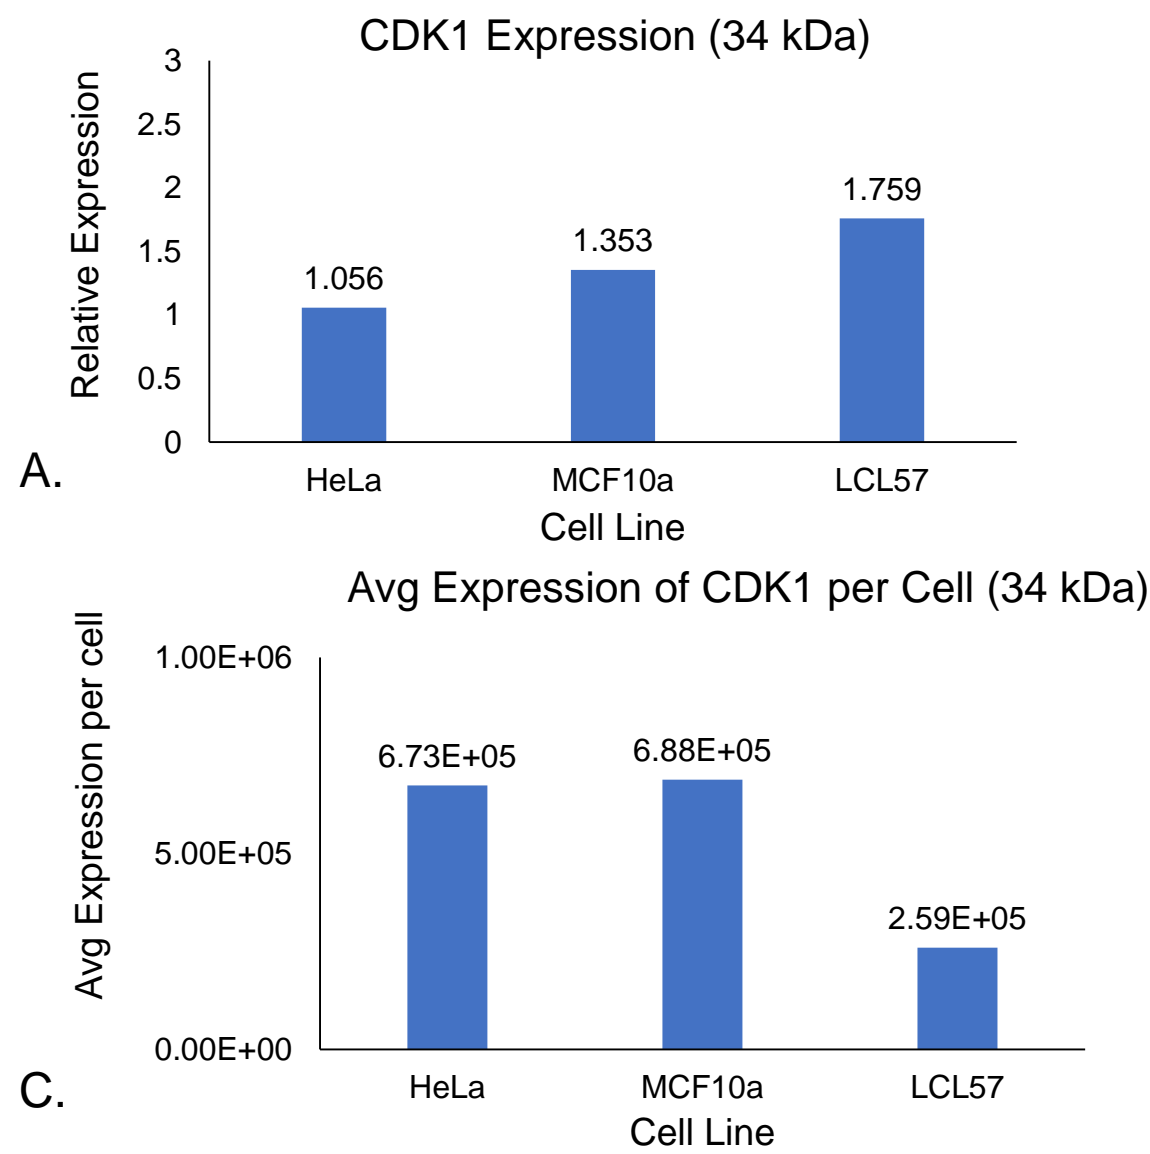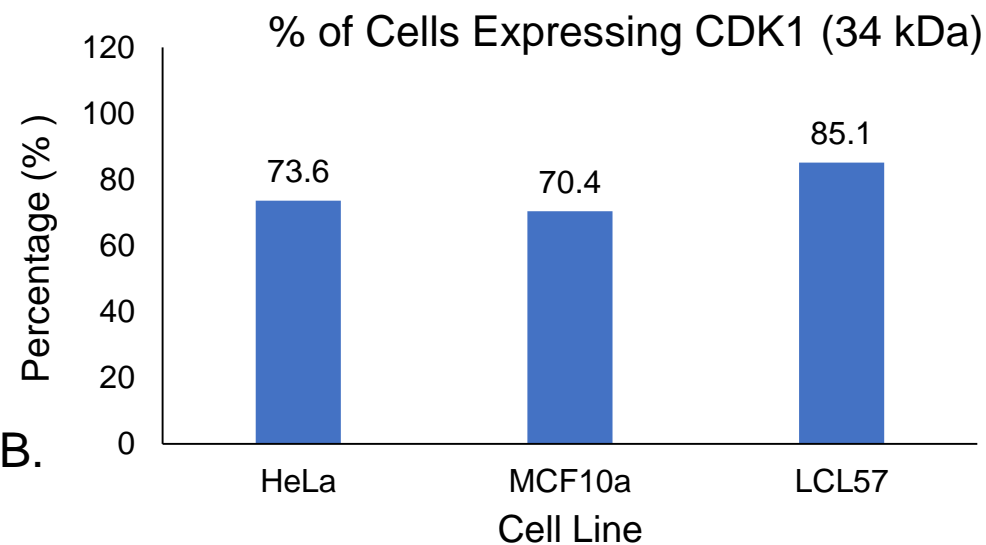

Single cell western blot data for CDK1 (34 kDa band). Relative expression of total CDK1 (34 kDa) in HeLa, MCF10A, and LCL57 cells (A). Percentage of cells that express CDK1 (B). Average expression of CDK1 protein per cell (C). All data is normalized to  $\beta$ -tubulin expression.

# Single Cell Western Blot

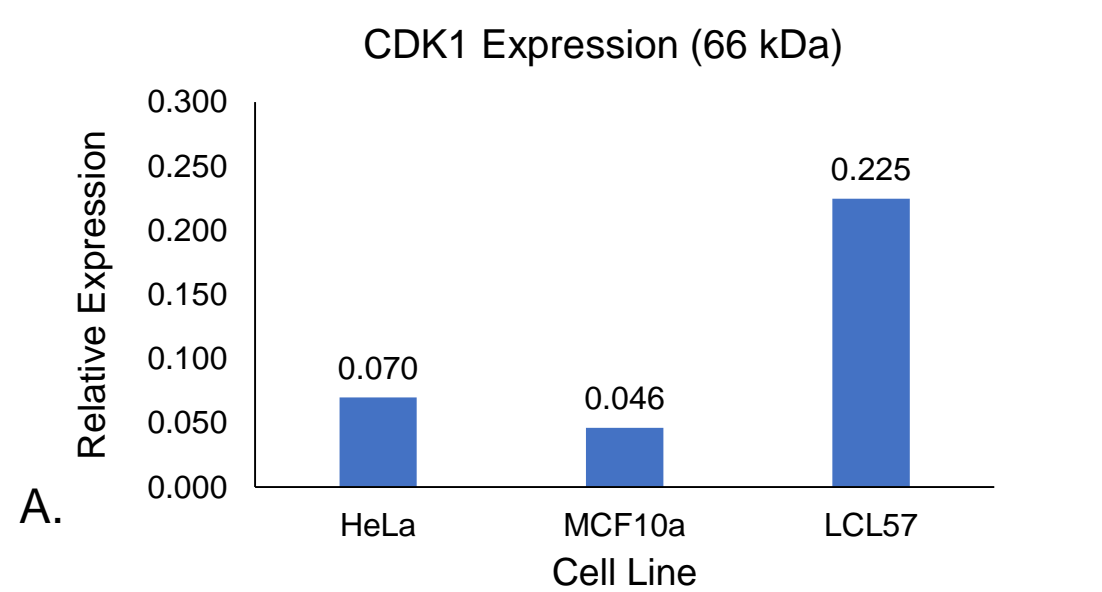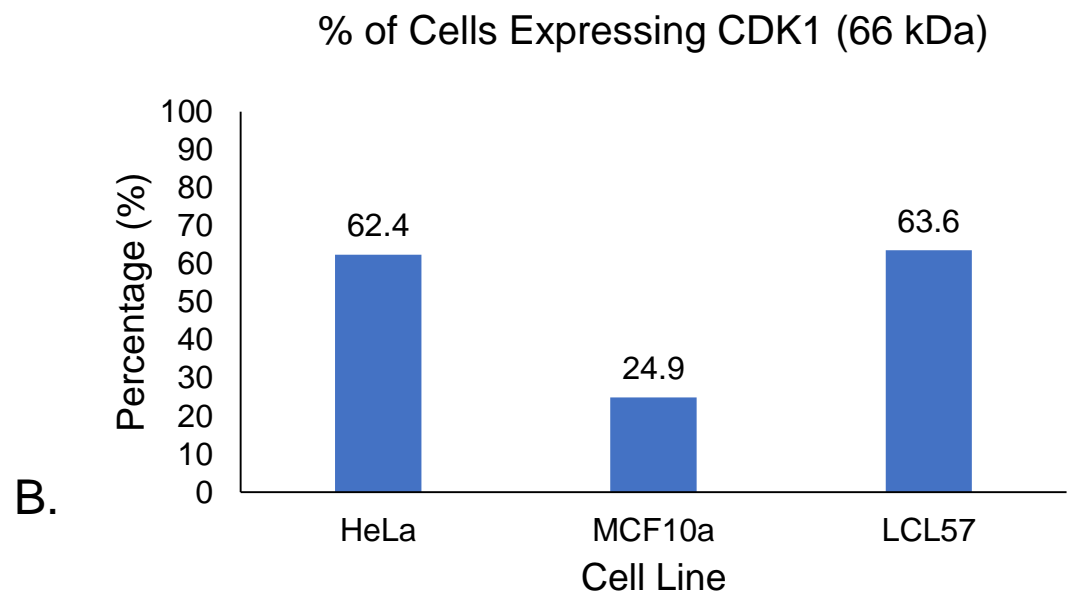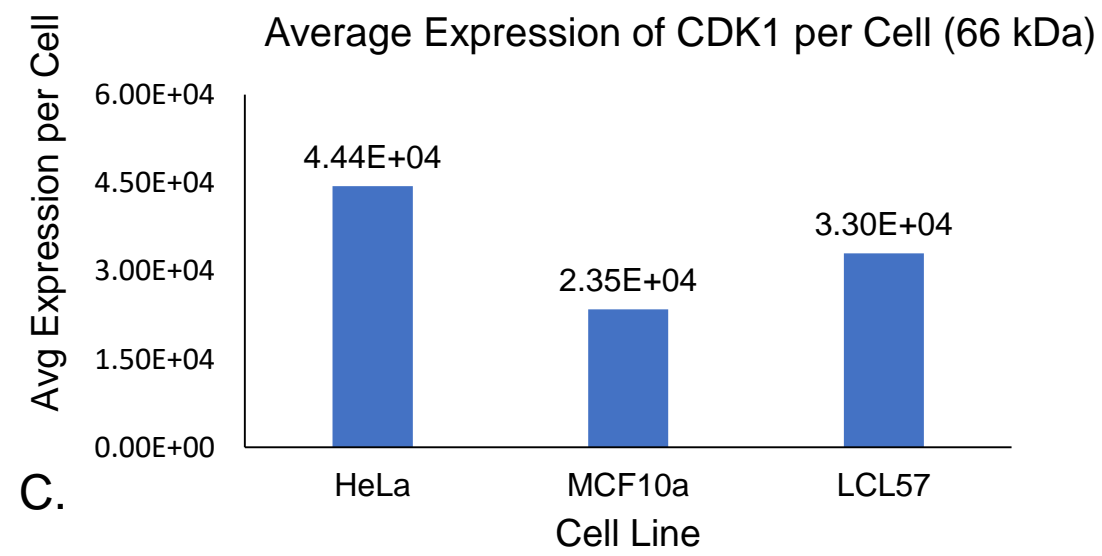

Single cell western blot data for CDK1 (66 kDa band). Relative expression of total CDK1 (66 kDa) in HeLa, MCF10A, and LCL57 cells (A). Percentage of cells that express CDK1 (B). Average expression of CDK1 protein per cell (C). All data is normalized to  $\beta$ -tubulin expression.

# Single Cell Western Blot

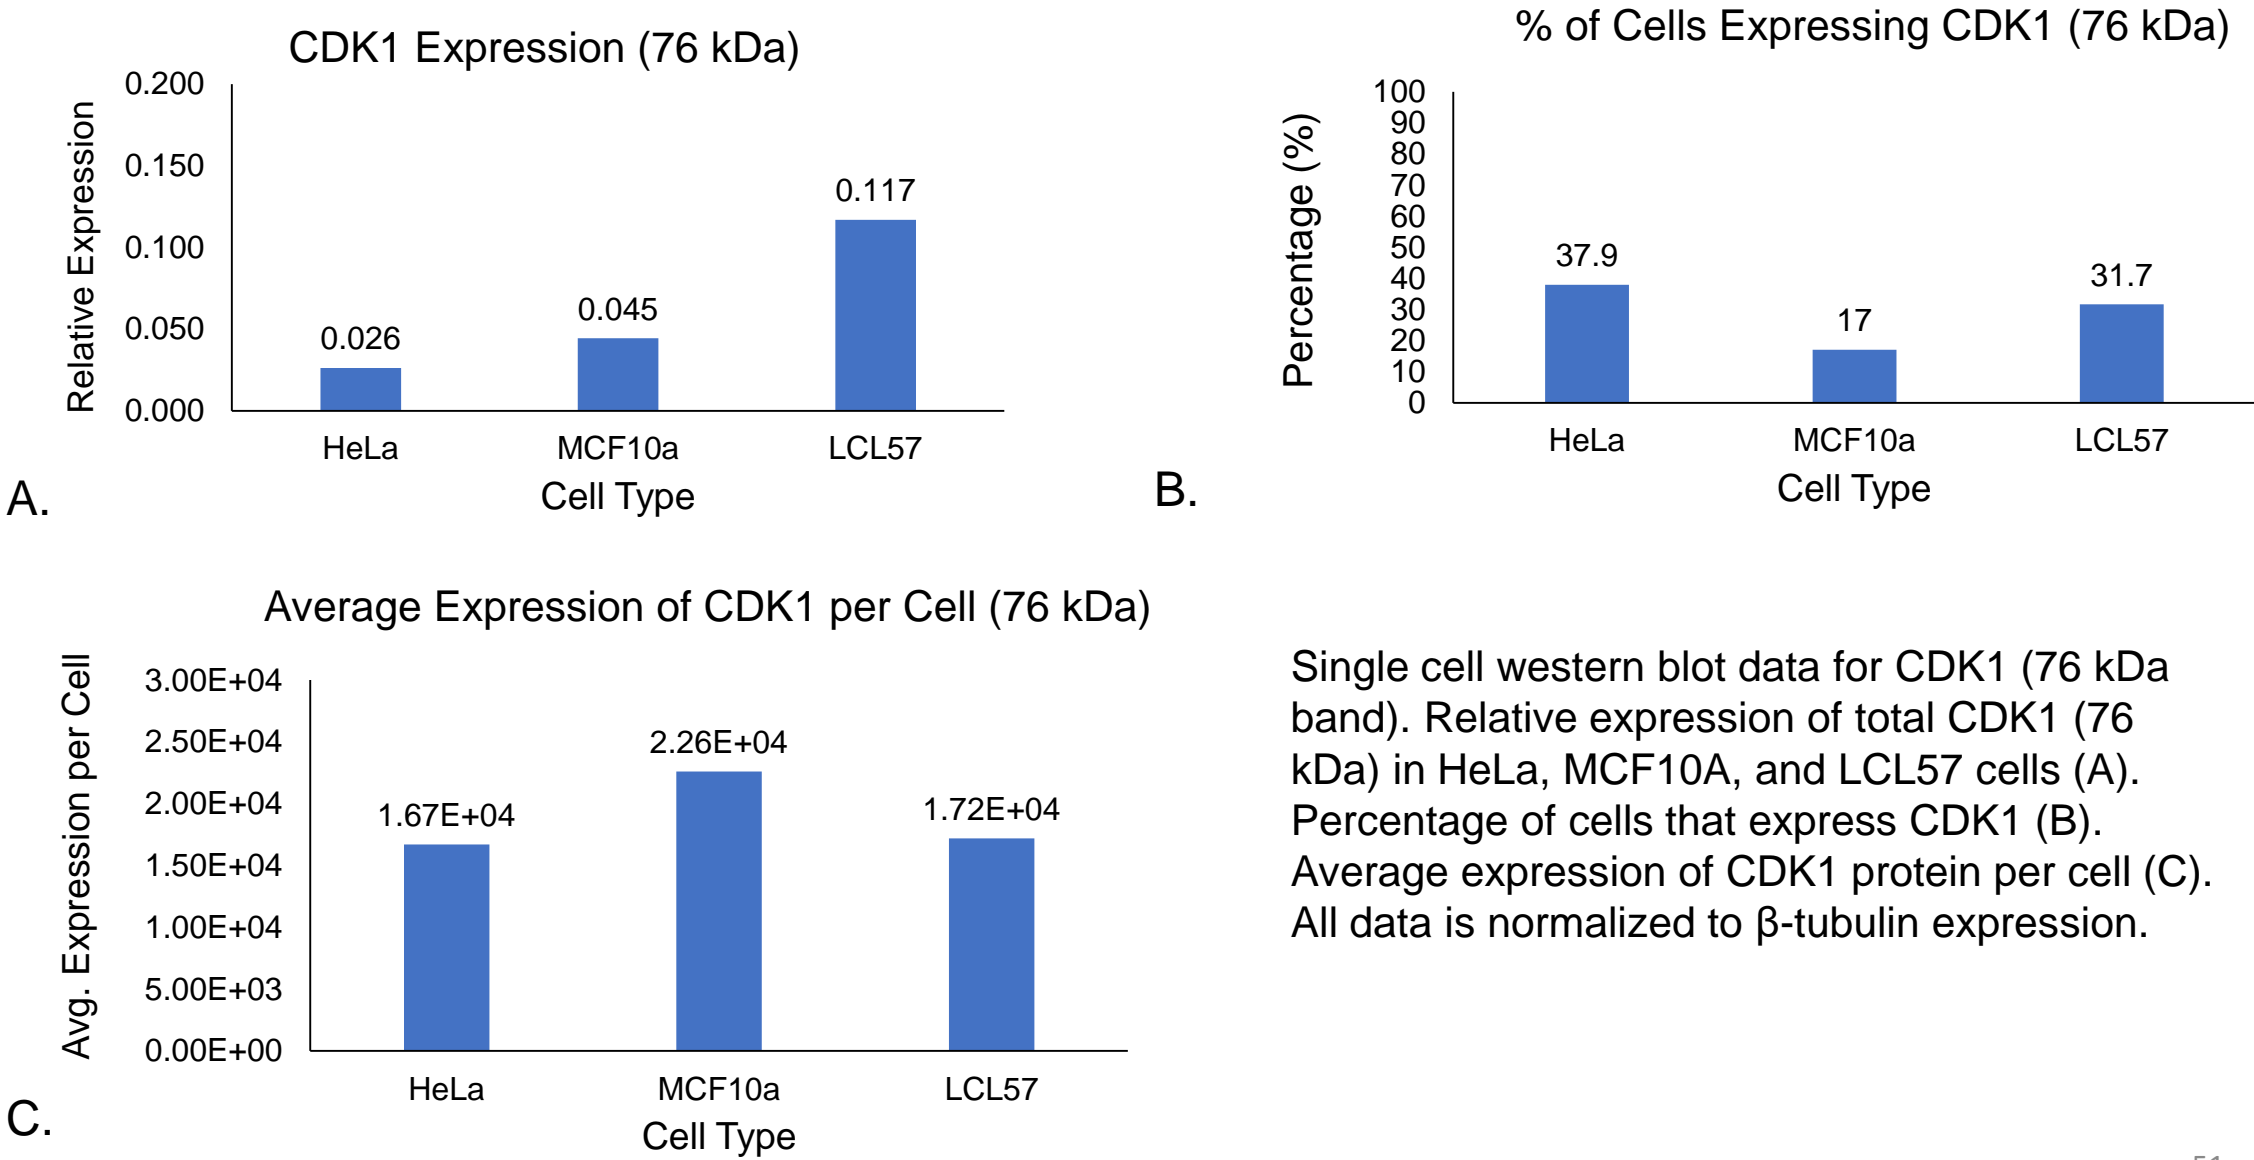

Single cell western blot data for CDK1 (76 kDa band). Relative expression of total CDK1 (76 kDa) in HeLa, MCF10A, and LCL57 cells (A). Percentage of cells that express CDK1 (B). Average expression of CDK1 protein per cell (C). All data is normalized to  $\beta$ -tubulin expression.

## 8. CPTC-CDK7-1

| Technique | Analyte | Result |
|-----------|---------|--------|
| WB        | RecProt | P      |
| Wes       | HeLa    | P      |
|           | MCF10A  | P      |
|           | LCL57   | P      |
| WB        | HeLa    | P      |
|           | MCF10A  | P      |
|           | LCL57   | P      |
| IF        | HeLa    | P      |
|           | MCF10A  | N†     |
|           | LCL57   | P      |
| SCWB      | HeLa    | P      |
|           | MCF10A  | P      |
|           | LCL57   | P      |
| IP*       | RecProt | P      |
| IP*       | HeLa    | N      |
|           | MCF10A  | N      |
|           | LCL57   | N      |
| IHC       |         | P      |
| NCI60     |         | P      |

P – Positive, N – Negative, \* Please refer to tables for results, † Data not shown



# WB against commercial recombinant protein

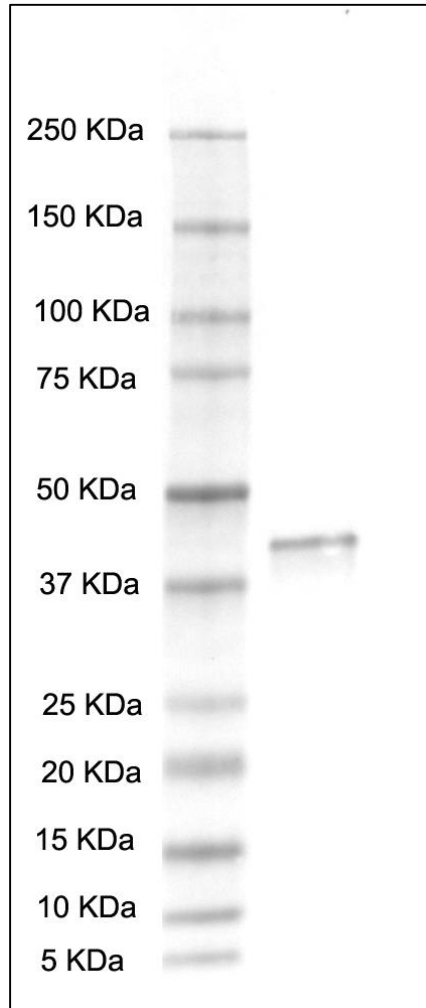

Ag Vendor: Origene

Cat #: TP302736

Description: Recombinant protein of human cyclin-dependent kinase 7 (CDK7)

Predicted MW: 38.9 kDa

## Endogenous WB

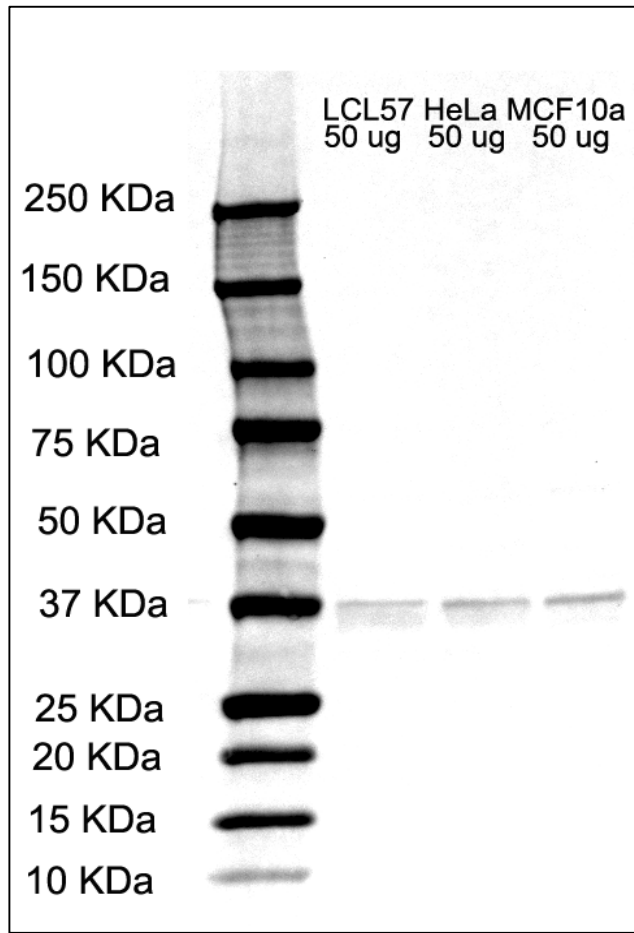

## Endogenous Wes

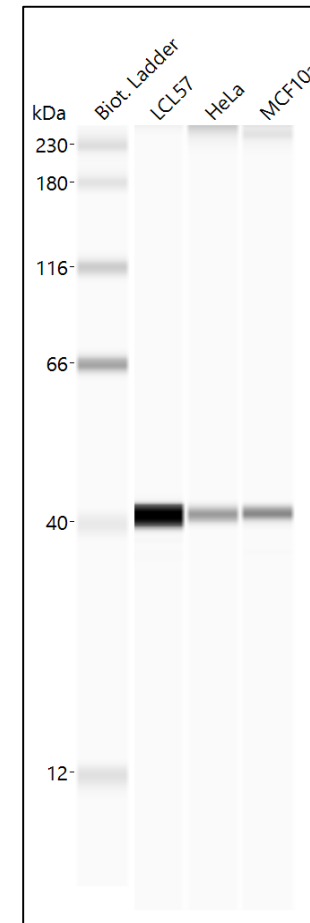

# Immunofluorescence - HeLa

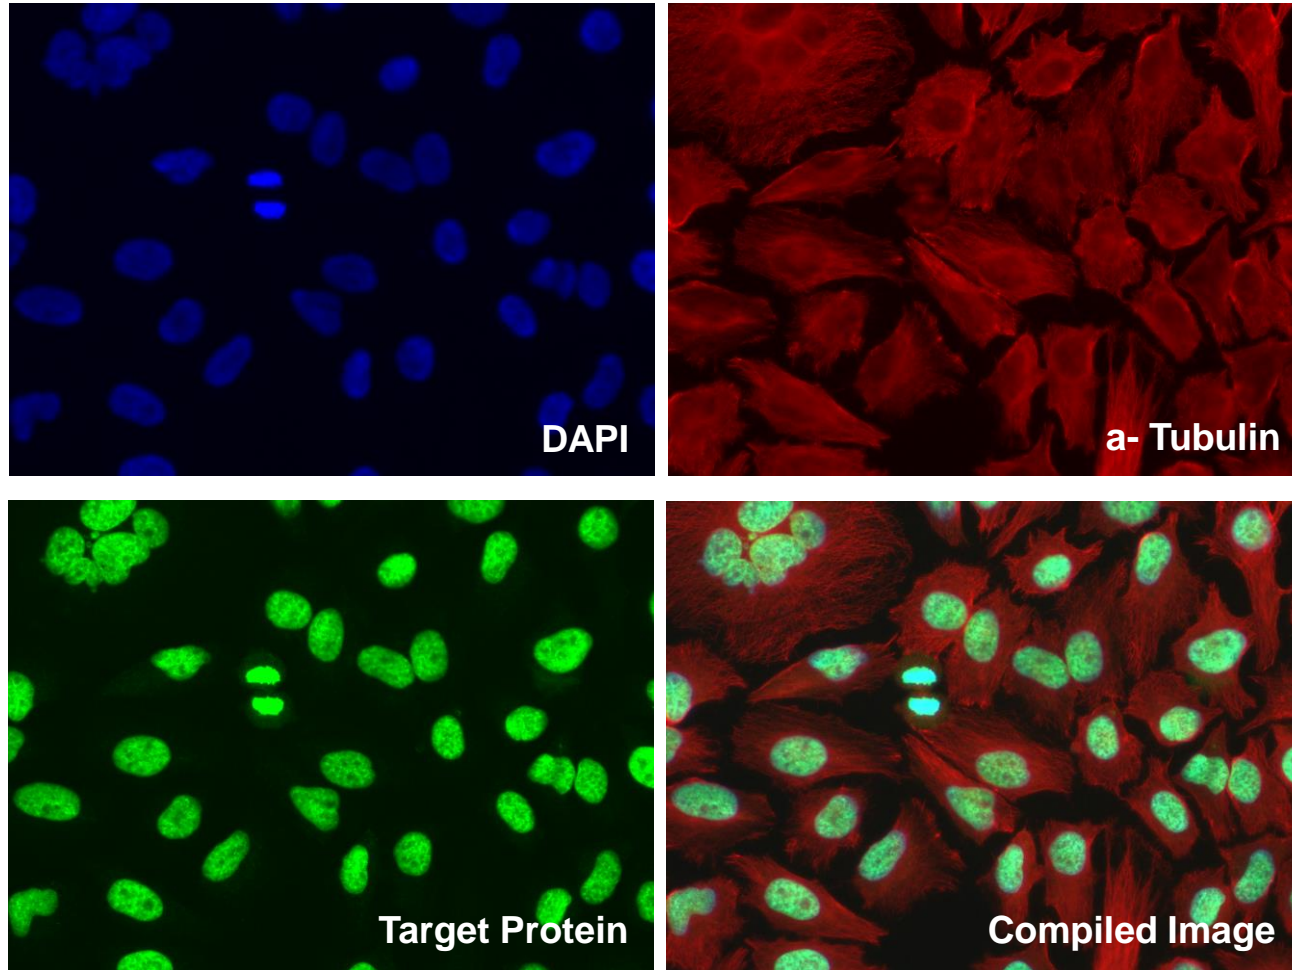

Subcellular Location: Nucleus, Other

# Immunofluorescence - LCL57

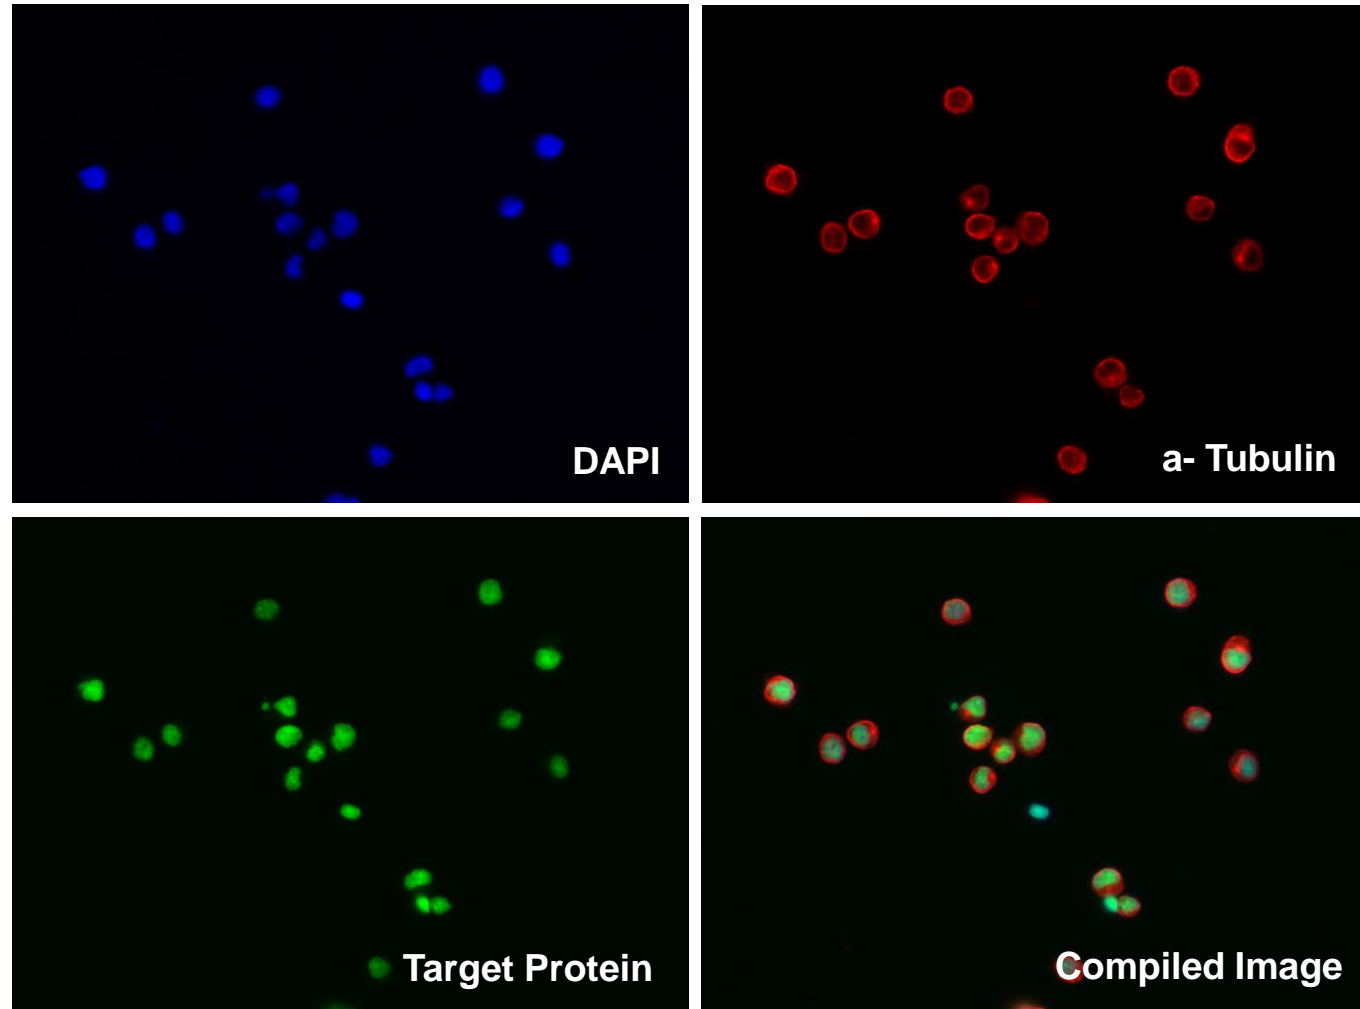

Subcellular Location: Nucleus, Other

# Single Cell Western Blot

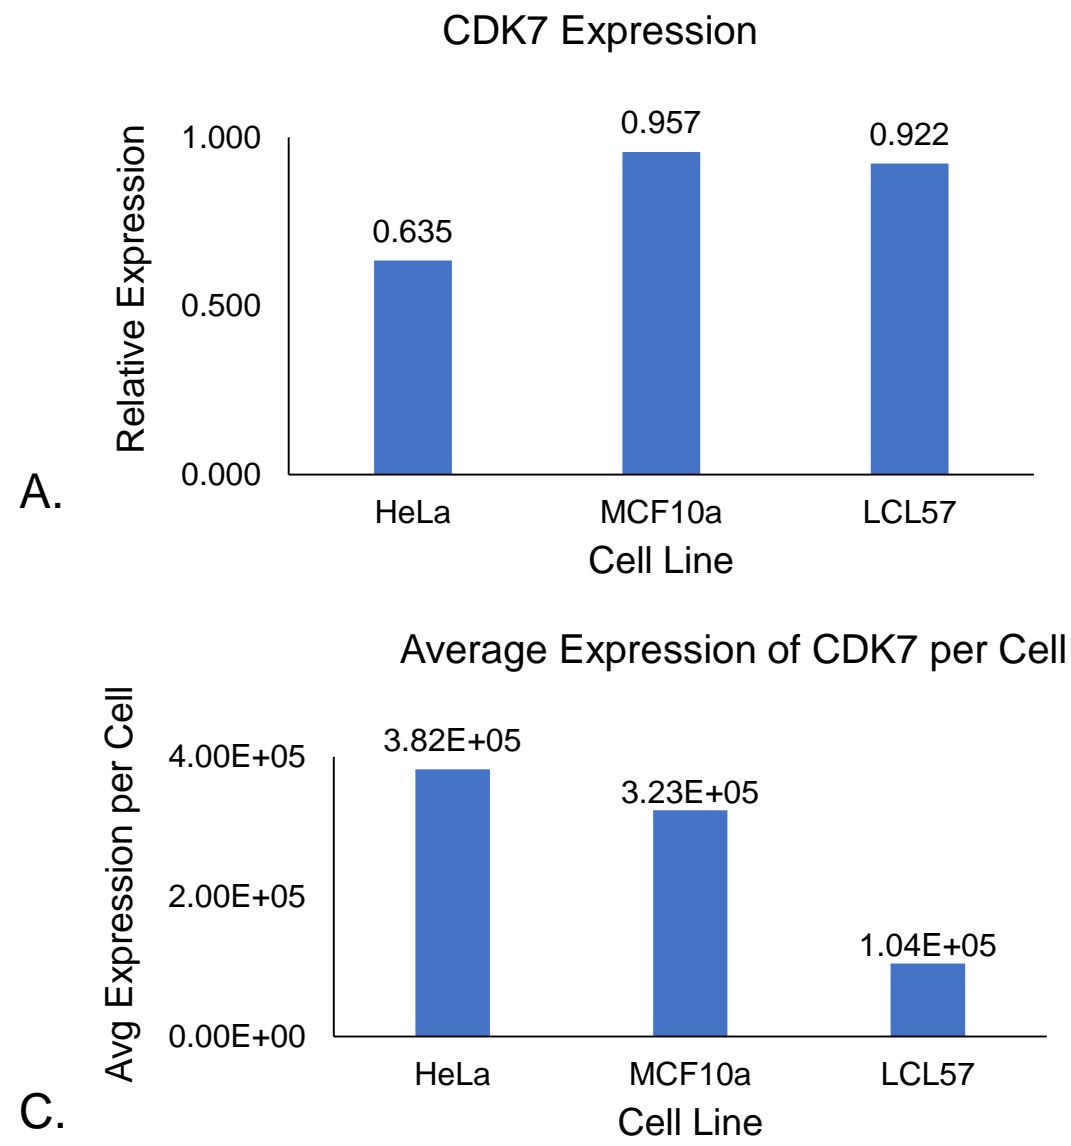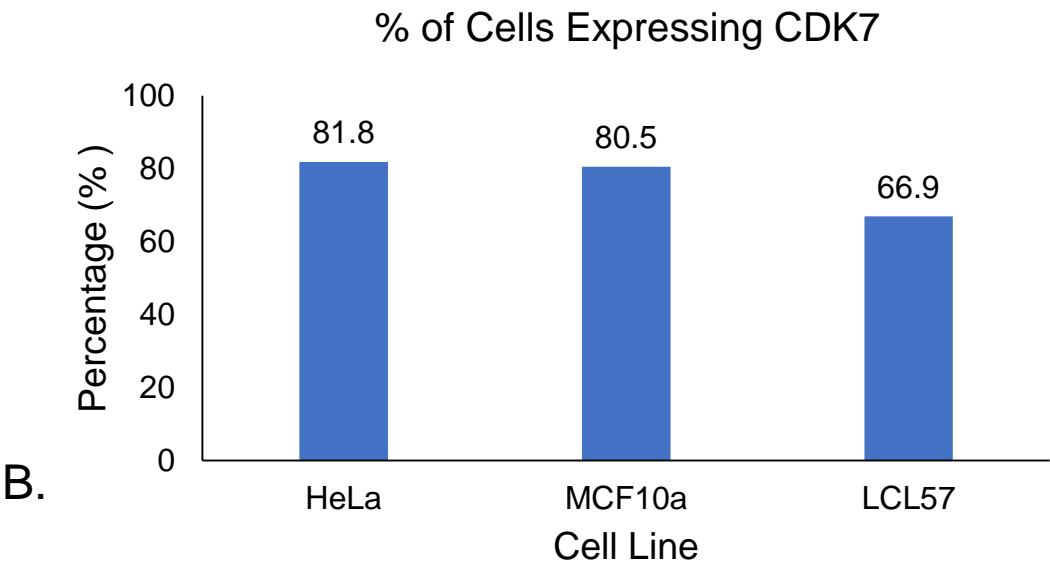

Single cell western blot data for CDK7 (38.9 kDa band). Relative expression of total CDK7 (76 kDa) in HeLa, MCF10A, and LCL57 cells (A). Percentage of cells that express CDK7 (B). Average expression of CDK7 protein per cell (C). All data is normalized to  $\beta$ -tubulin expression.

# CPTC-CDK7-1

NCI60 Results for CPTC-CDK7-1

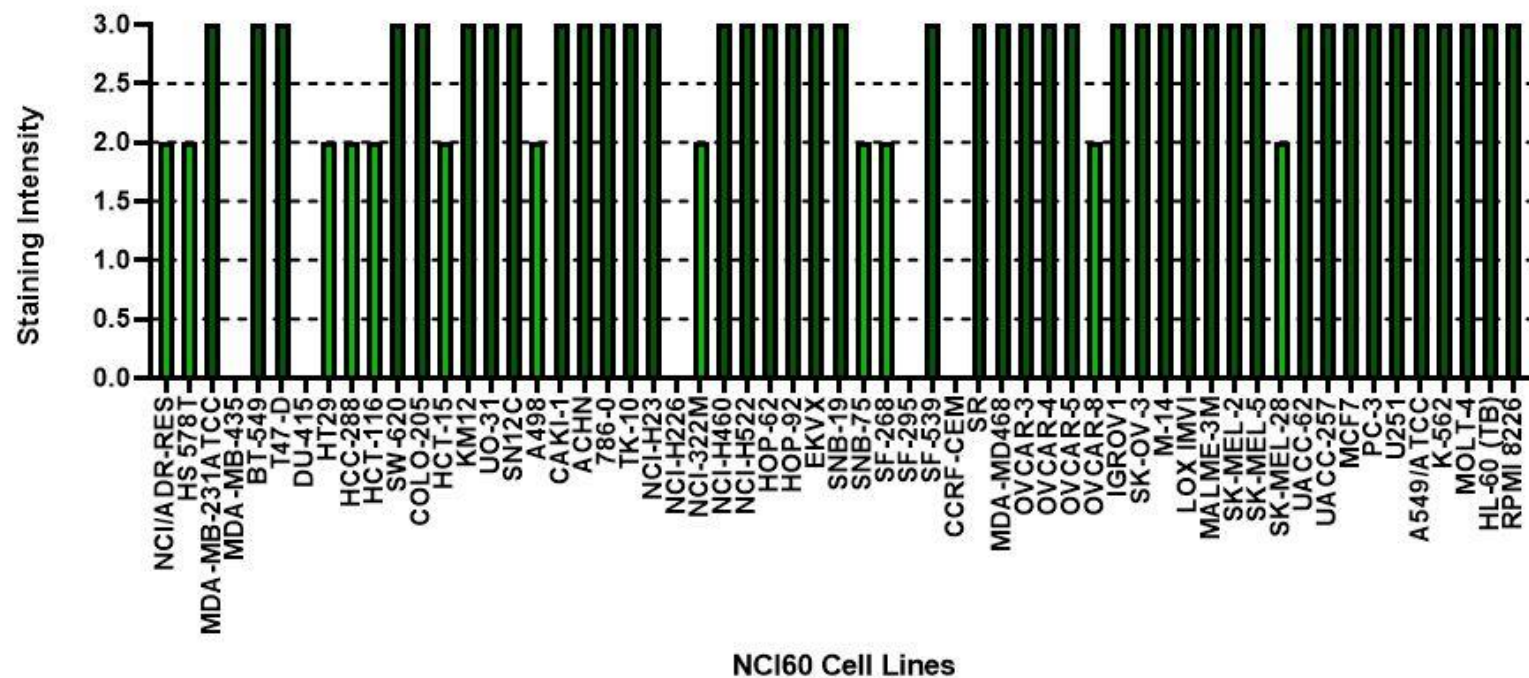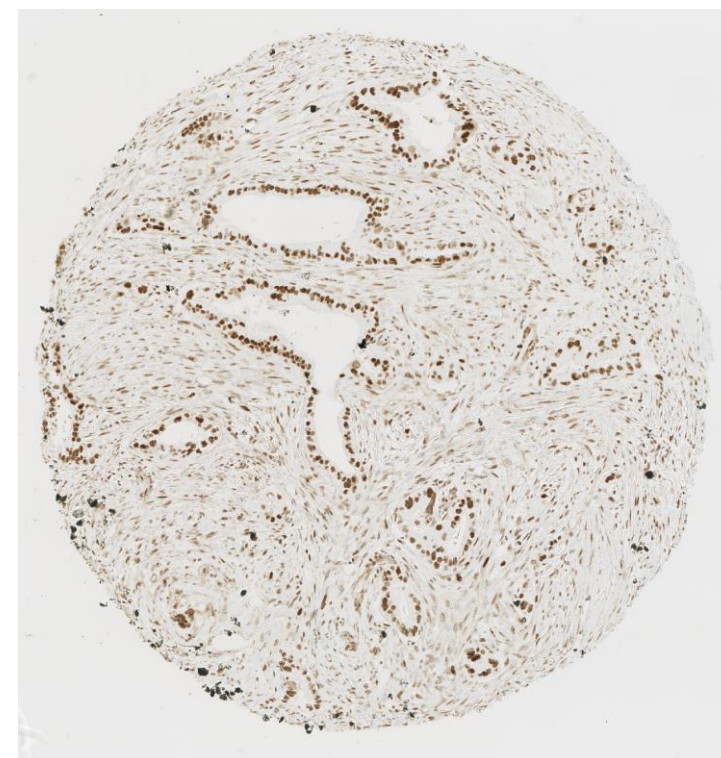

## 9. CPTC-CHEK1-6

| Technique | Analyte | Result |
|-----------|---------|--------|
| WB        | RecProt | P      |
| Wes       | HeLa    | N      |
|           | MCF10A  | P      |
|           | LCL57   | N      |
| WB        | HeLa    | P      |
|           | MCF10A  | P      |
|           | LCL57   | P      |
| IF        | HeLa    | N†     |
|           | MCF10A  | P      |
|           | LCL57   | N†     |
| SCWB†     | HeLa    | N      |
|           | MCF10A  | N      |
|           | LCL57   | N      |
| IP*       | RecProt | W      |
| IP*       | HeLa    | N      |
|           | MCF10A  | N      |
|           | LCL57   | N      |
| IHC       |         | N†     |
| NCI60     |         | NT     |

P – Positive, N – Negative, W – Weak, \* Please refer to tables for results, † Data not shown

# WB against commercial recombinant protein

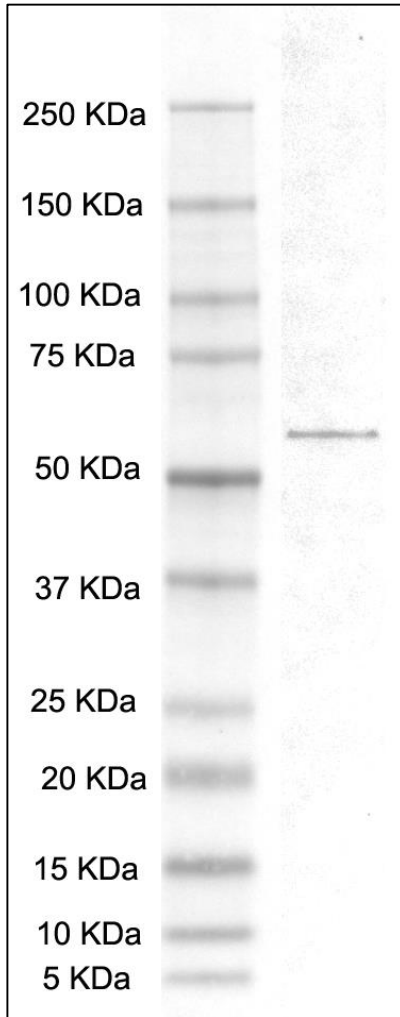

Ag Vendor: Origene

Cat #: TP325807

Description: Purified recombinant protein of Homo sapiens CHK1 checkpoint homolog (S. pombe) (CHEK1), transcript variant 3

Predicted MW: 54.3 kDa



## Endogenous WB

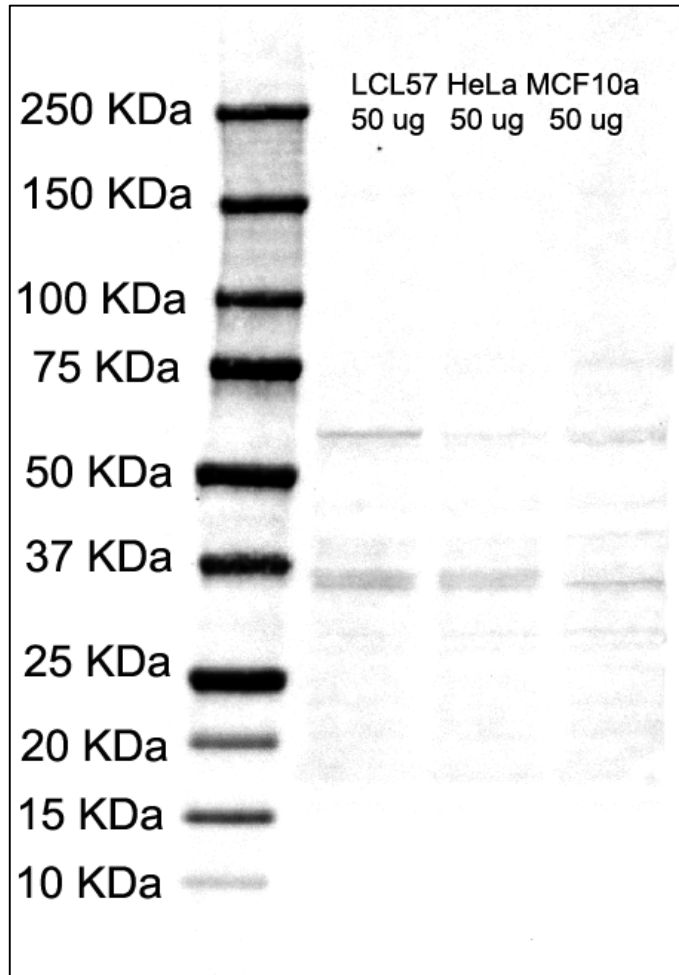

## Endogenous Wes

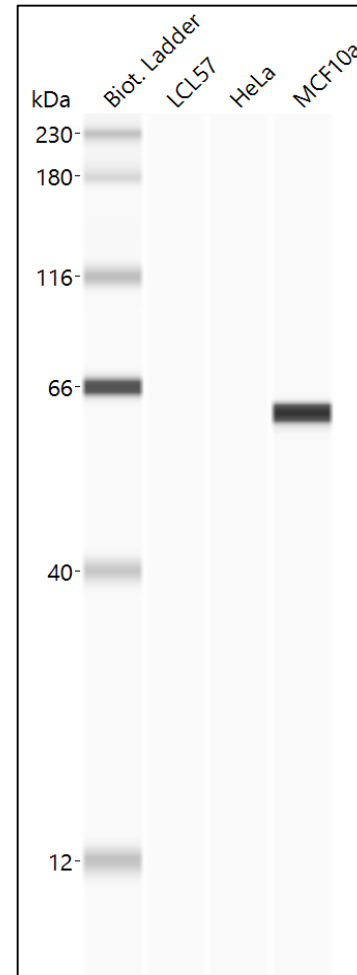

# Immunofluorescence - MCF10A

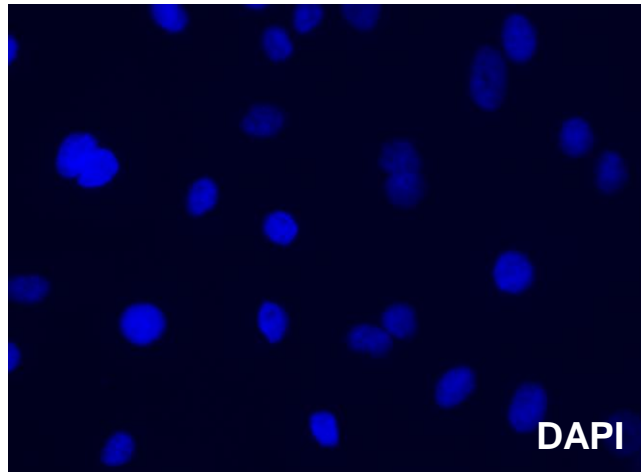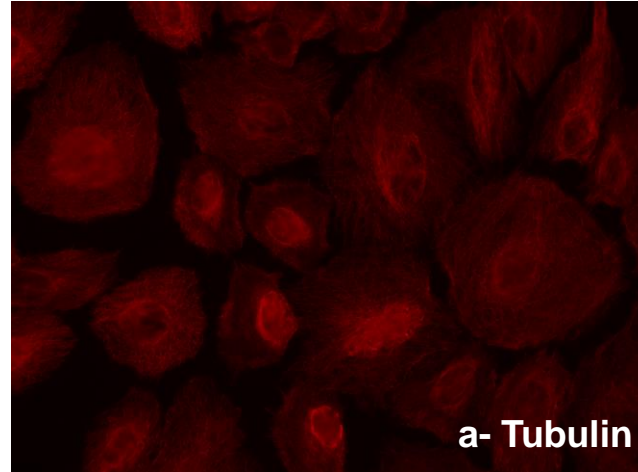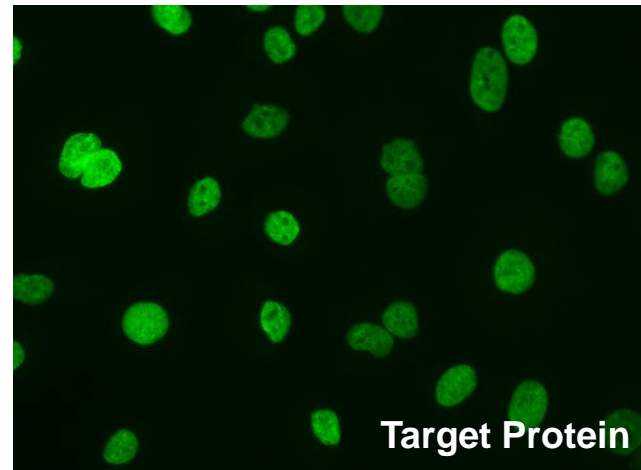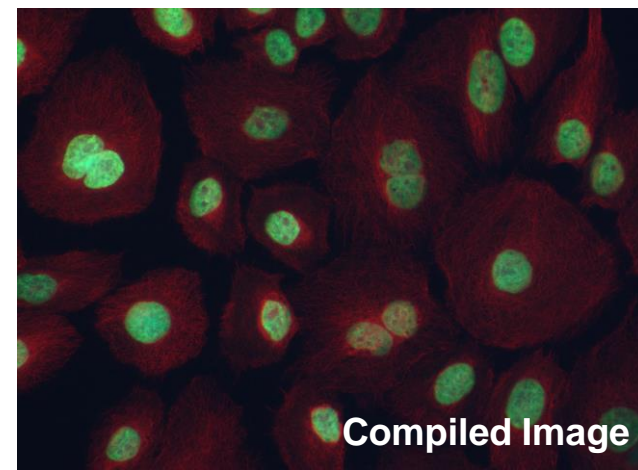

Subcellular Location: Nucleus, Cytoskeleton, Other

## 10. CPTC-CHEK2-1

| Technique | Analyte | Result    |
|-----------|---------|-----------|
| WB        | RecProt | <b>N*</b> |
| West†     | HeLa    | <b>N</b>  |
|           | MCF10A  | <b>N</b>  |
|           | LCL57   | <b>N</b>  |
| WB        | HeLa    | <b>NT</b> |
|           | MCF10A  | <b>NT</b> |
|           | LCL57   | <b>NT</b> |
| IF        | HeLa    | <b>NT</b> |
|           | MCF10A  | <b>NT</b> |
|           | LCL57   | <b>NT</b> |
| SCWB      | HeLa    | <b>NT</b> |
|           | MCF10A  | <b>NT</b> |
|           | LCL57   | <b>NT</b> |
| IP        | RecProt | <b>NT</b> |
| IP        | HeLa    | <b>NT</b> |
|           | MCF10A  | <b>NT</b> |
|           | LCL57   | <b>NT</b> |
| IHC       |         | <b>N*</b> |
| NCI60     |         | <b>NT</b> |

N – Negative, NT – Not Tested, \*Data not shown

†Data shown are from Phospho-specificity Experiment

# Endogenous Wes

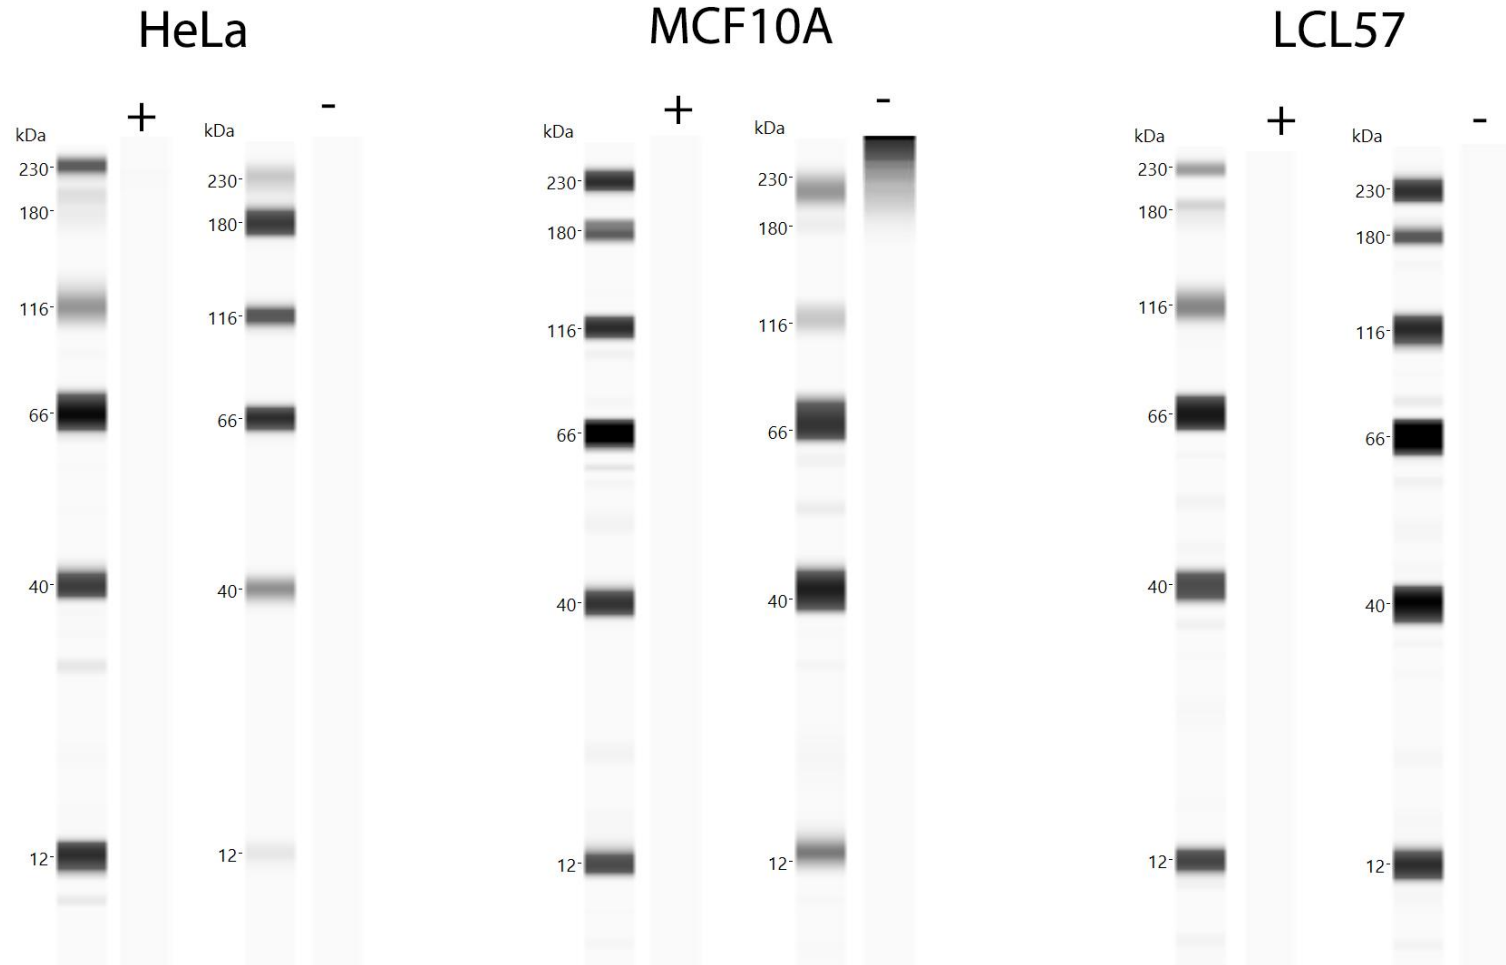

Expected molecular weight: 61 kDa

+ : irradiation treated cells  
- : not treated cells

## 11. CPTC-CHEK2-2

| Technique | Analyte | Result |
|-----------|---------|--------|
| WB        | RecProt | P      |
| Wes       | HeLa    | P      |
|           | MCF10A  | P      |
|           | LCL57   | P      |
| WB        | HeLa    | U      |
|           | MCF10A  | U      |
|           | LCL57   | U      |
| IF        | HeLa    | N†     |
|           | MCF10A  | N†     |
|           | LCL57   | P      |
| SCWB†     | HeLa    | N      |
|           | MCF10A  | N      |
|           | LCL57   | N      |
| IP*       | RecProt | P      |
| IP*       | HeLa    | N      |
|           | MCF10A  | N      |
|           | LCL57   | N      |
| IHC       |         | N†     |
| NCI60     |         | NT     |

P – Positive, N – Negative, U – Undetermined, \* Please refer to tables for results, † Data not shown

# WB against commercial recombinant protein

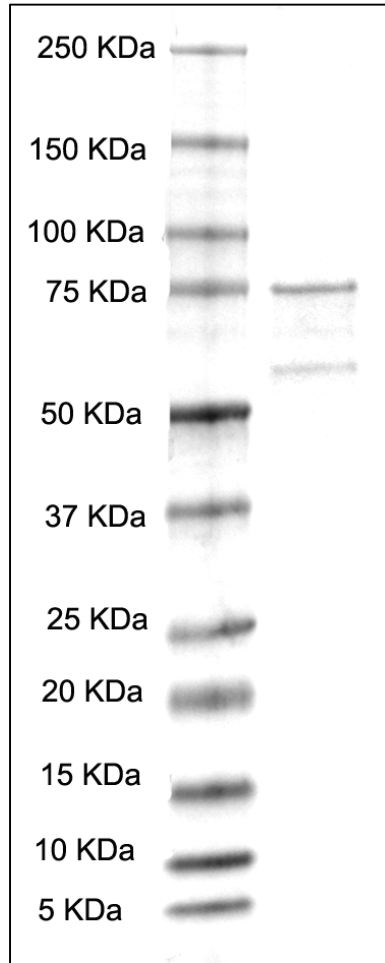

Ag Vendor: Origene

Cat #: TP301278

Description: Recombinant protein of human CHK2 checkpoint homolog (*S. pombe*) (CHEK2), transcript variant 1

Predicted MW: 60.7 kDa

## Endogenous WB

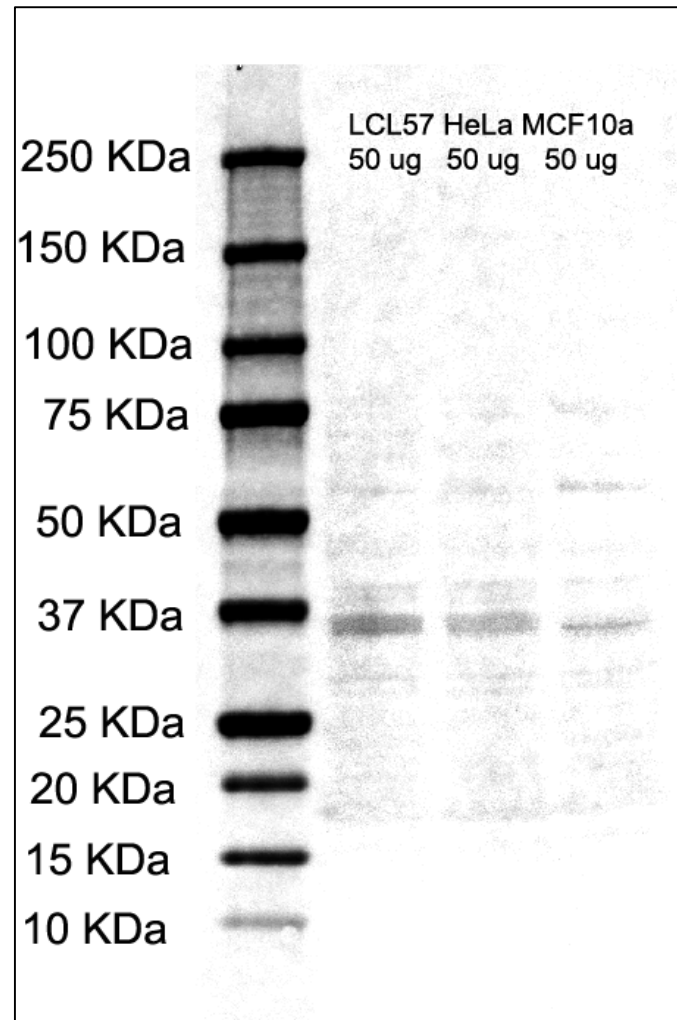

## Endogenous Wes

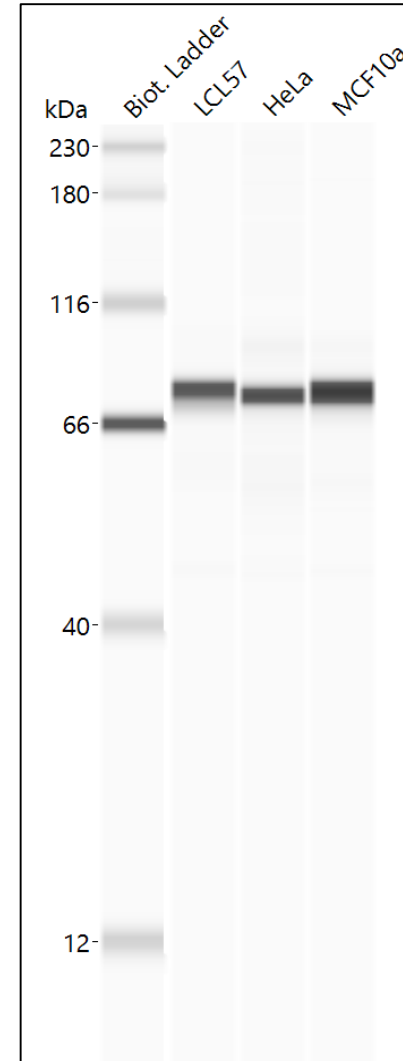

# Immunofluorescence - LCL57

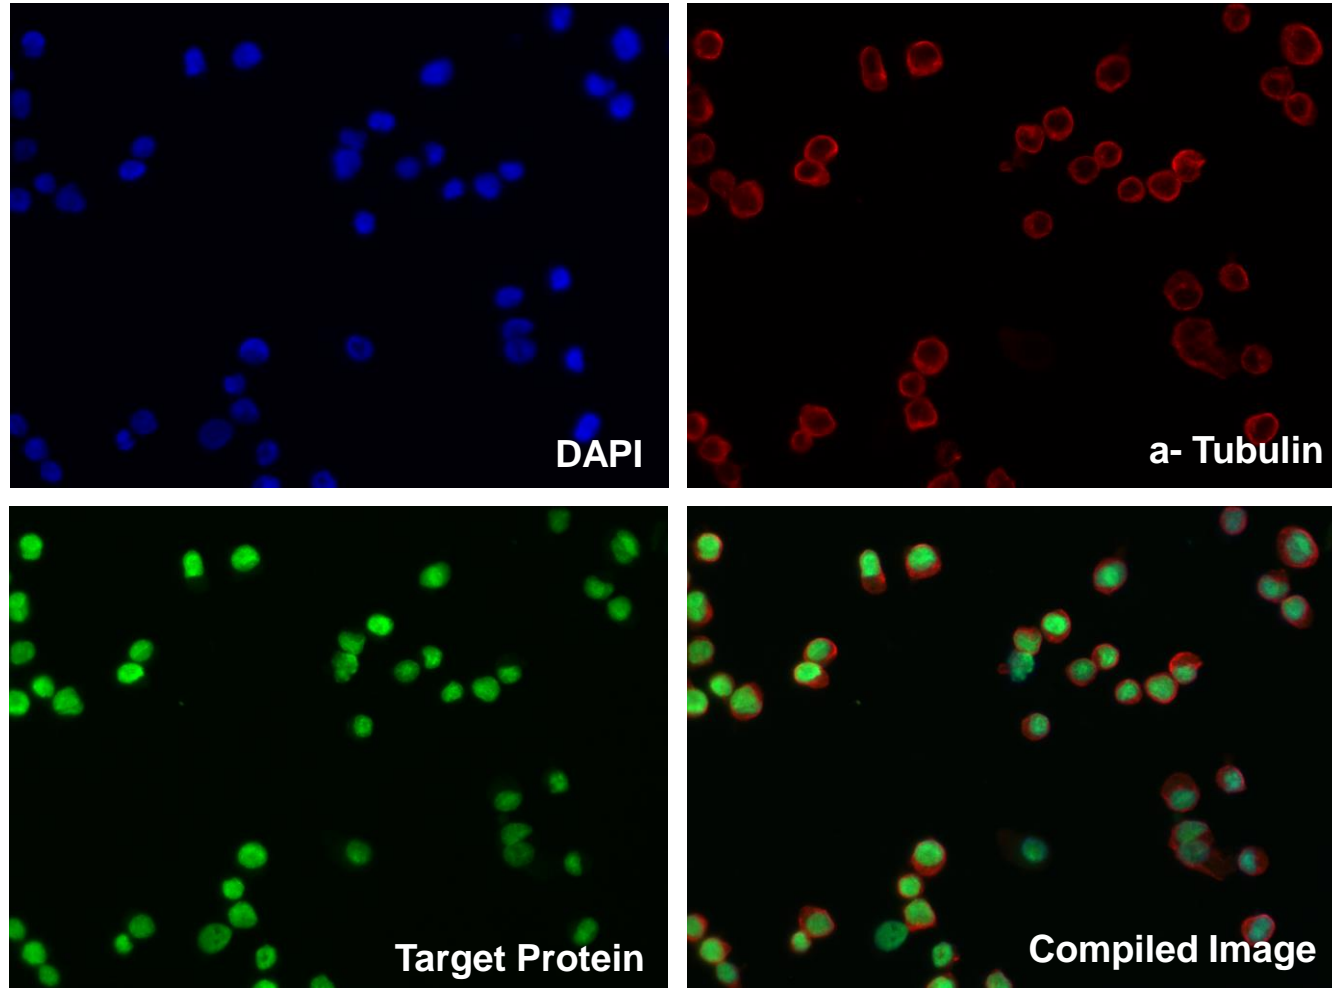

Subcellular Location: Nucleus, Other



## 12. CPTC-GAPDH-1

| Technique | Analyte | Result |
|-----------|---------|--------|
| WB        | RecProt | P      |
| Wes       | HeLa    | P      |
|           | MCF10A  | P      |
|           | LCL57   | P      |
| WB        | HeLa    | P      |
|           | MCF10A  | P      |
|           | LCL57   | P      |
| IF        | HeLa    | P      |
|           | MCF10A  | P      |
|           | LCL57   | P      |
| SCWB†     | HeLa    | NT     |
|           | MCF10A  | NT     |
|           | LCL57   | NT     |
| IP*       | RecProt | P      |
| IP*       | HeLa    | W      |
|           | MCF10A  | W      |
|           | LCL57   | N      |
| IHC       |         | N‡     |
| NCI60     |         | NT     |

P – Positive, N – Negative, NT – Not Tested, W – Weak, \* Please refer to tables for results, †The single cell western blot technique used did not provide sufficient denaturing conditions for accurate detection of GAPDH. ‡ Data not shown <sup>69</sup>

# WB against commercial recombinant protein

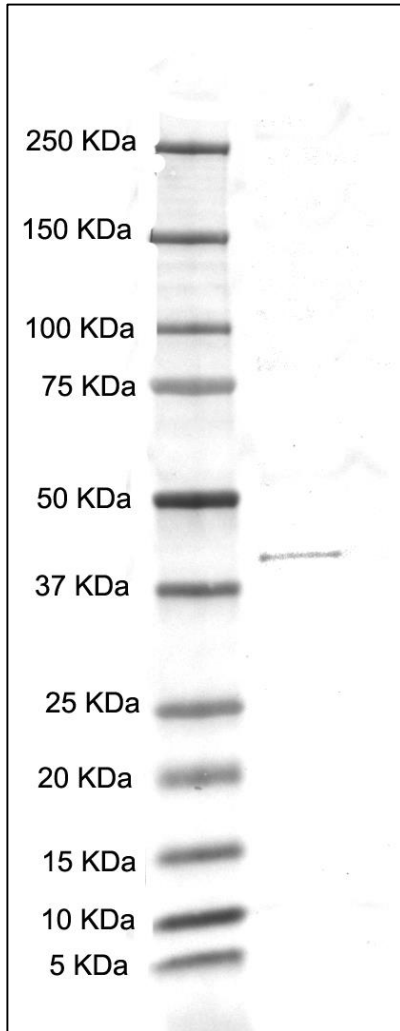

Ag Vendor: Origene

Cat #: TP302309

Description: GAPDH (NM\_002046) Human Recombinant Protein

Predicted MW: 36 kDa

## Endogenous WB

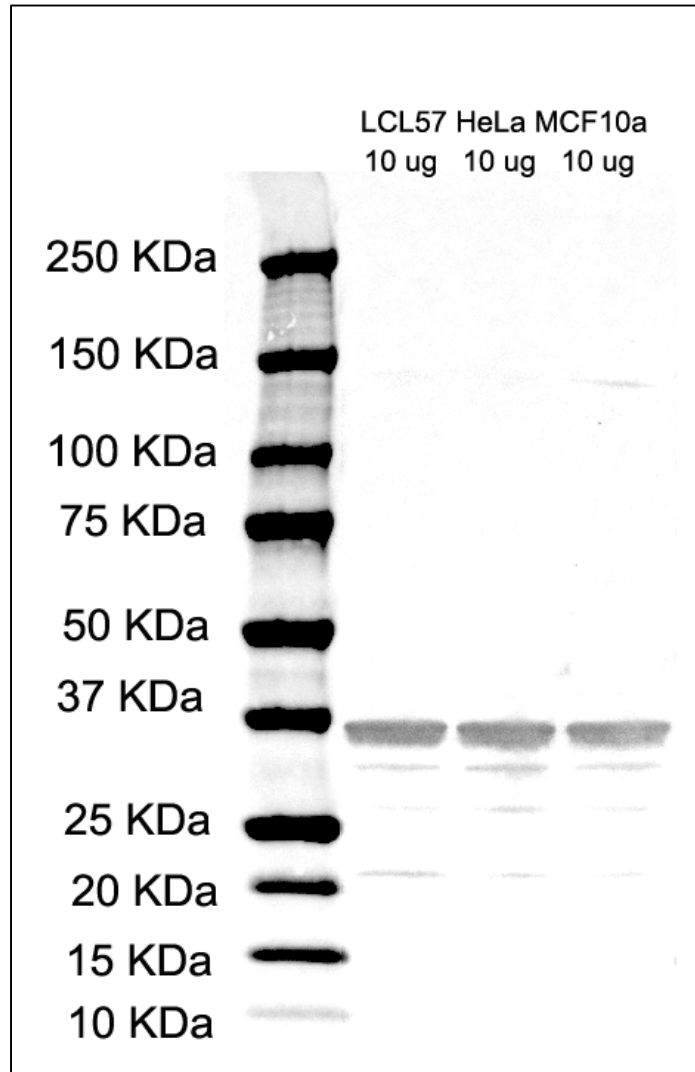

## Endogenous Wes

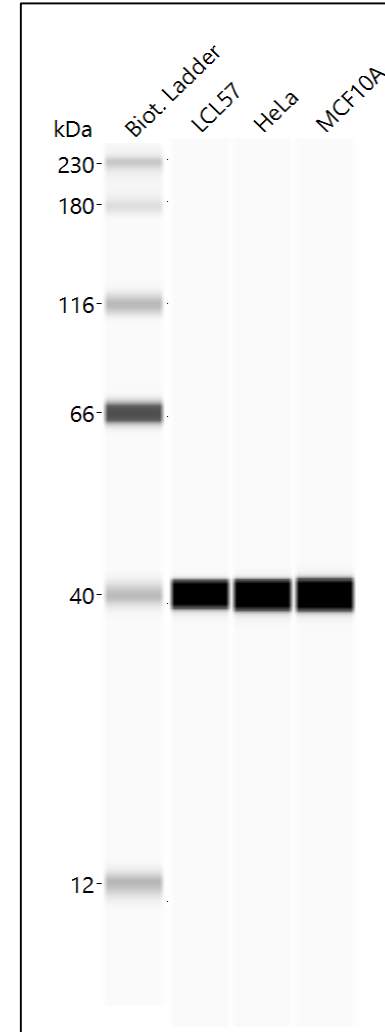

# Immunofluorescence - HeLa

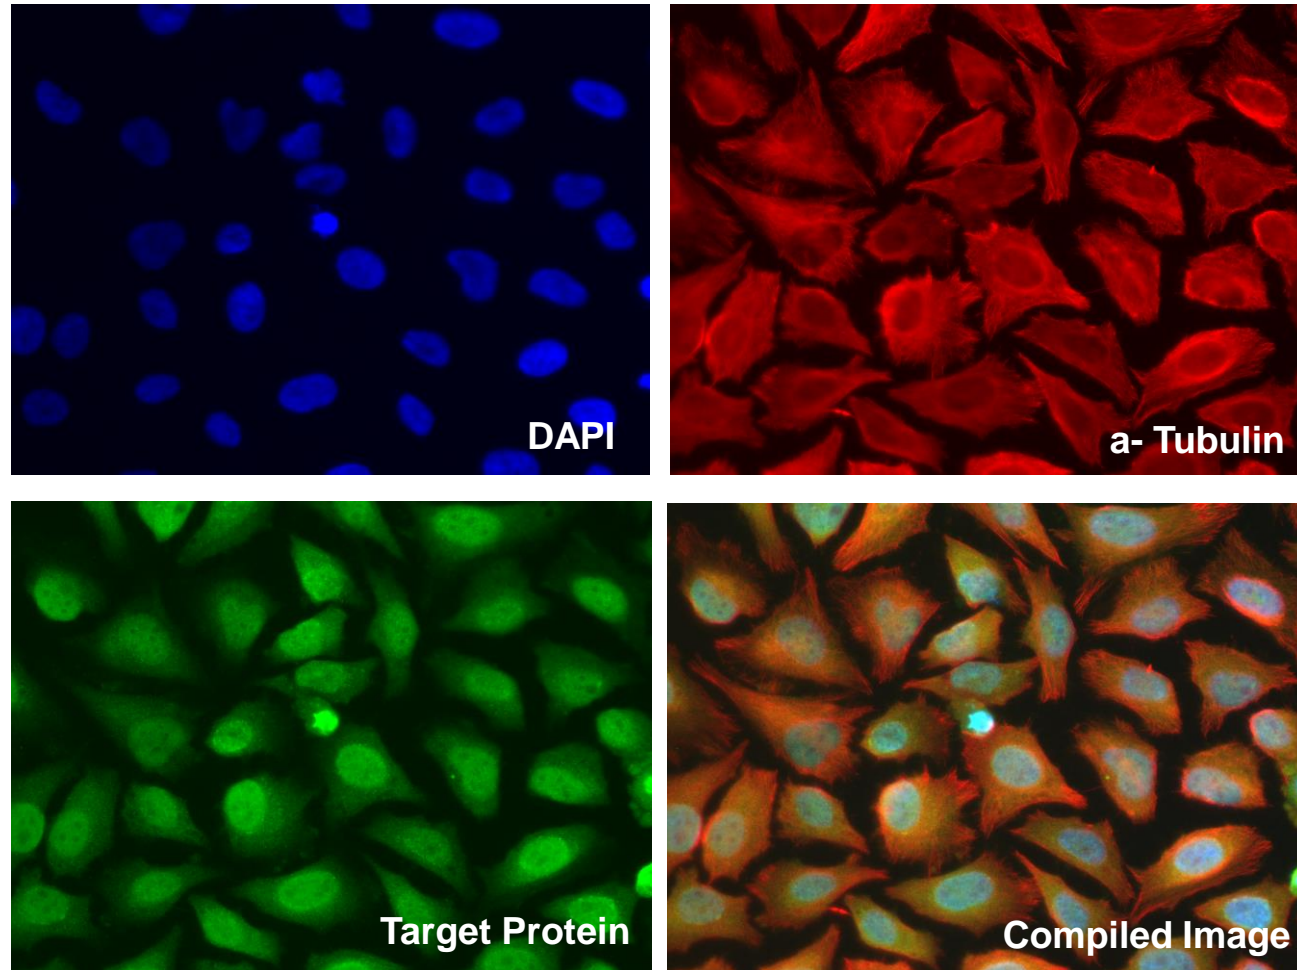

Subcellular Locations: Cytosol, Cytoskeleton, Nucleus, Other

# Immunofluorescence - MCF10A

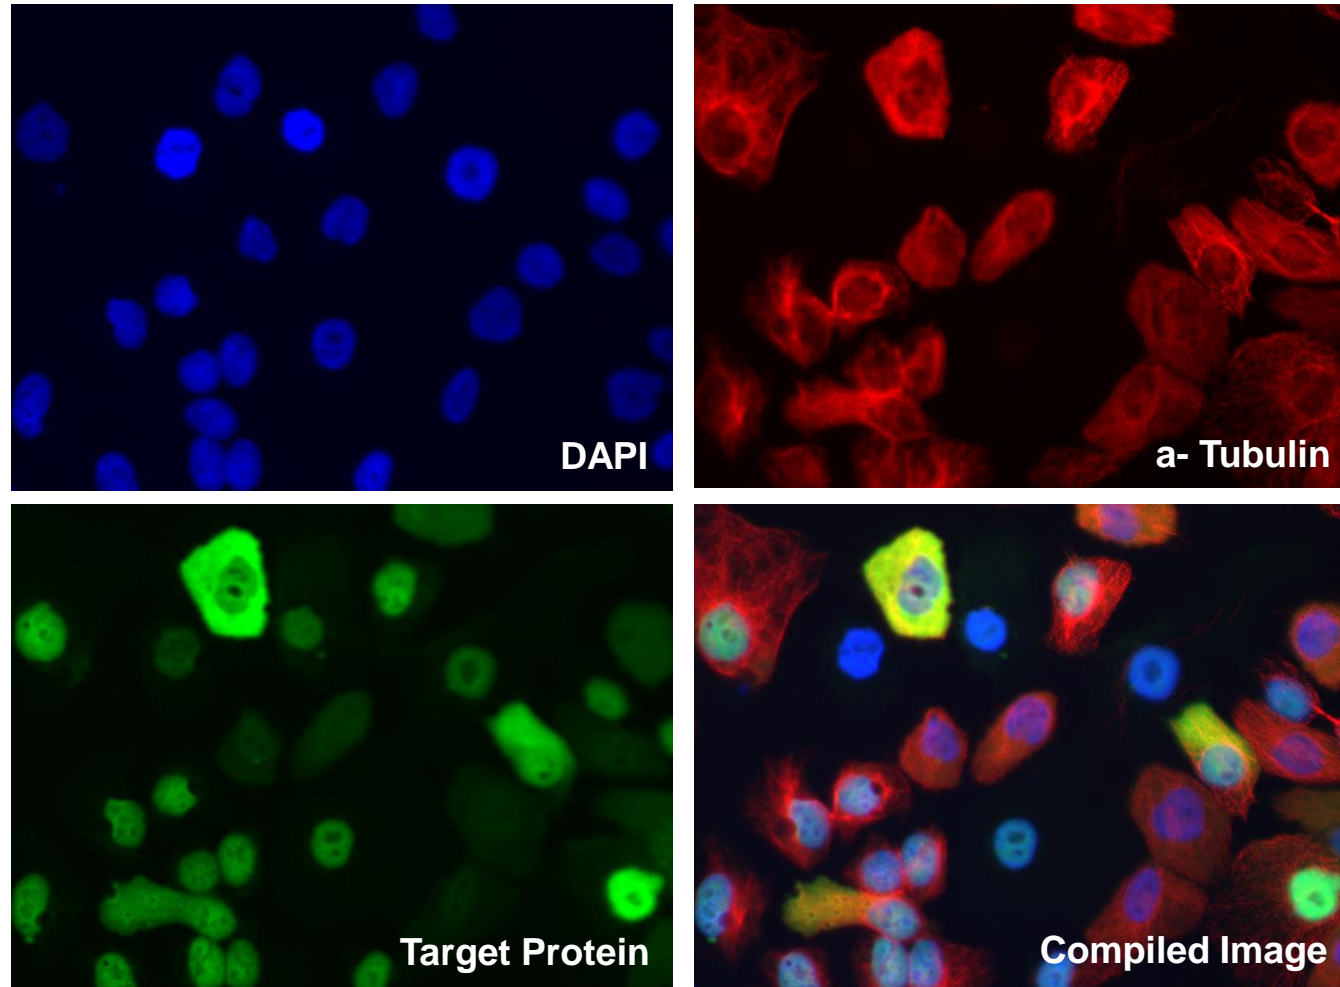

Subcellular Locations: Cytosol, Cytoskeleton, Nucleus, Other

## Immunofluorescence - LCL57

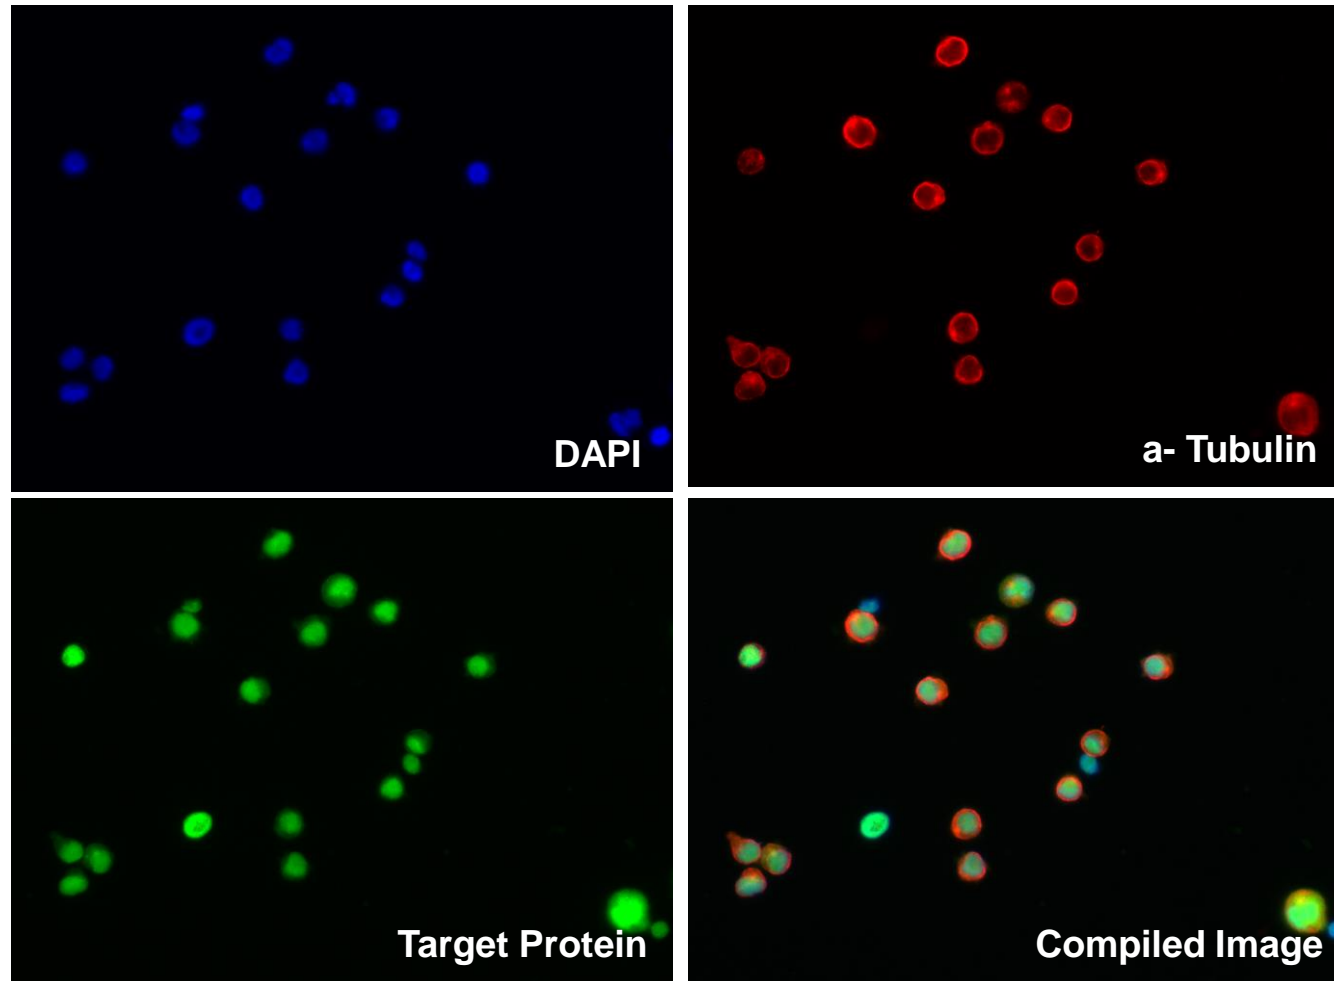

Subcellular Locations: Cytosol, Cytoskeleton, Nucleus, Other

### 13. CPTC-KNL1-1

| Technique | Analyte | Result    |
|-----------|---------|-----------|
| WB        | RecProt | <b>N*</b> |
| West†     | HeLa    | <b>N</b>  |
|           | MCF10A  | <b>N</b>  |
|           | LCL57   | <b>N</b>  |
| WB        | HeLa    | <b>NT</b> |
|           | MCF10A  | <b>NT</b> |
|           | LCL57   | <b>NT</b> |
| IF        | HeLa    | <b>NT</b> |
|           | MCF10A  | <b>NT</b> |
|           | LCL57   | <b>NT</b> |
| SCWB      | HeLa    | <b>NT</b> |
|           | MCF10A  | <b>NT</b> |
|           | LCL57   | <b>NT</b> |
| IP        | RecProt | <b>NT</b> |
| IP        | HeLa    | <b>NT</b> |
|           | MCF10A  | <b>NT</b> |
|           | LCL57   | <b>NT</b> |
| IHC       |         | <b>N*</b> |
| NCI60     |         | <b>NT</b> |

N – Negative, NT – Not Tested, \* Data not shown

† Data shown are from Phospho-specificity Experiment.

# Endogenous Wes

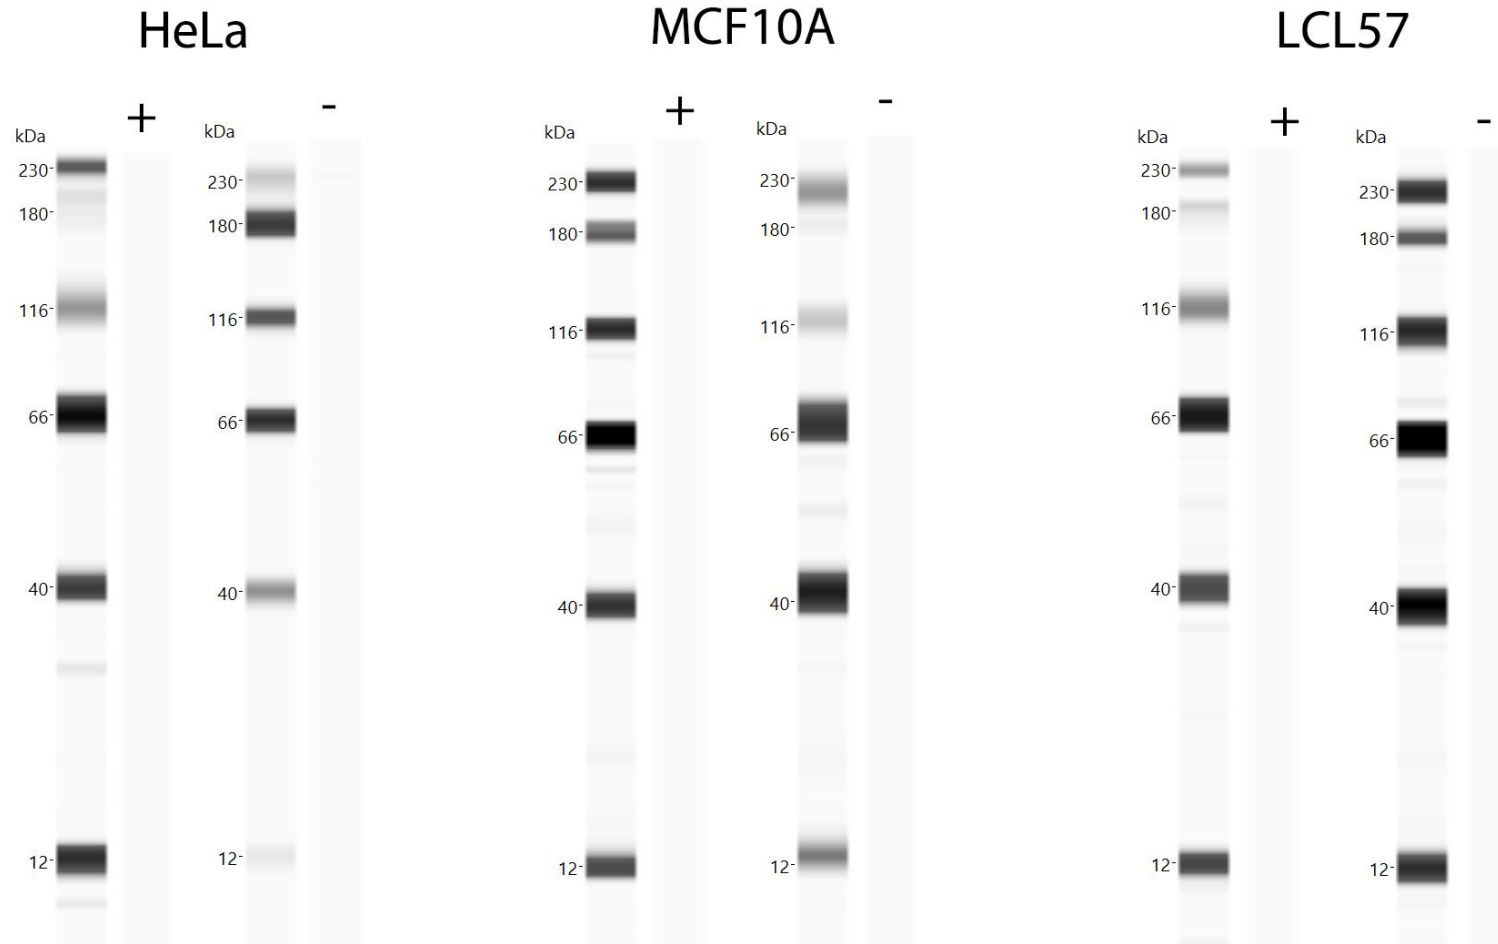

Expected molecular weight: 265, 263, 196, 206 kDa

+ : irradiation treated cells  
- : not treated cells



## 14. CPTC-KRT Group A-1

| Technique | Analyte | Result |
|-----------|---------|--------|
| WB        | RecProt | P      |
| Wes       | HeLa    | NT     |
|           | MCF10A  | NT     |
|           | LCL57   | NT     |
| WB        | HeLa    | P      |
|           | MCF10A  | P      |
|           | LCL57   | N      |
| IF        | HeLa    | P      |
|           | MCF10A  | P      |
|           | LCL57   | P      |
| SCWB      | HeLa    | P      |
|           | MCF10A  | P      |
|           | LCL57   | N†     |
| IP*       | RecProt | P      |
| IP*       | HeLa    | P      |
|           | MCF10A  | W      |
|           | LCL57   | W      |
| IHC       |         | N†     |
| NCI60     |         | NT     |

P – Positive, N – Negative, NT – Not Tested, W – Weak, \* Please refer to tables for results, † Data not shown

# WB against commercial recombinant protein

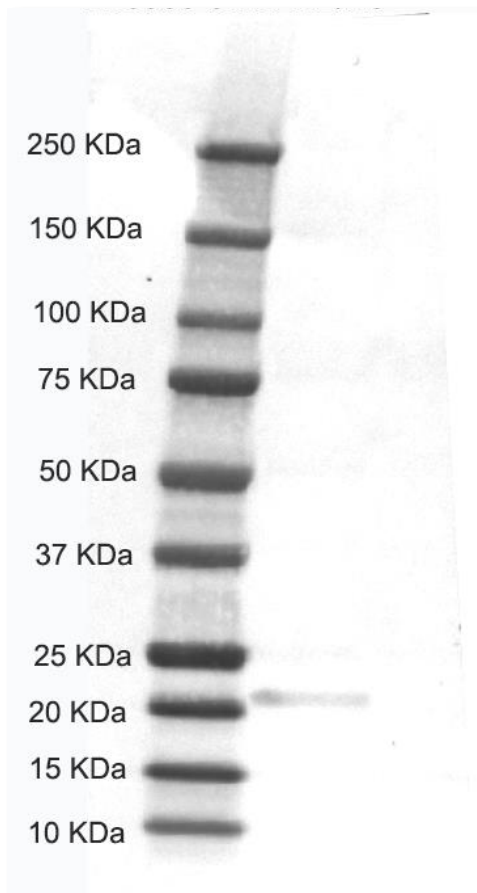

Ag Vendor: Origene

Cat #: TP309707

Description: Cytokeratin 19 (KRT19) (NM\_002276) Human Recombinant Protein

Predicted MW: 44 kDa

# Endogenous WB

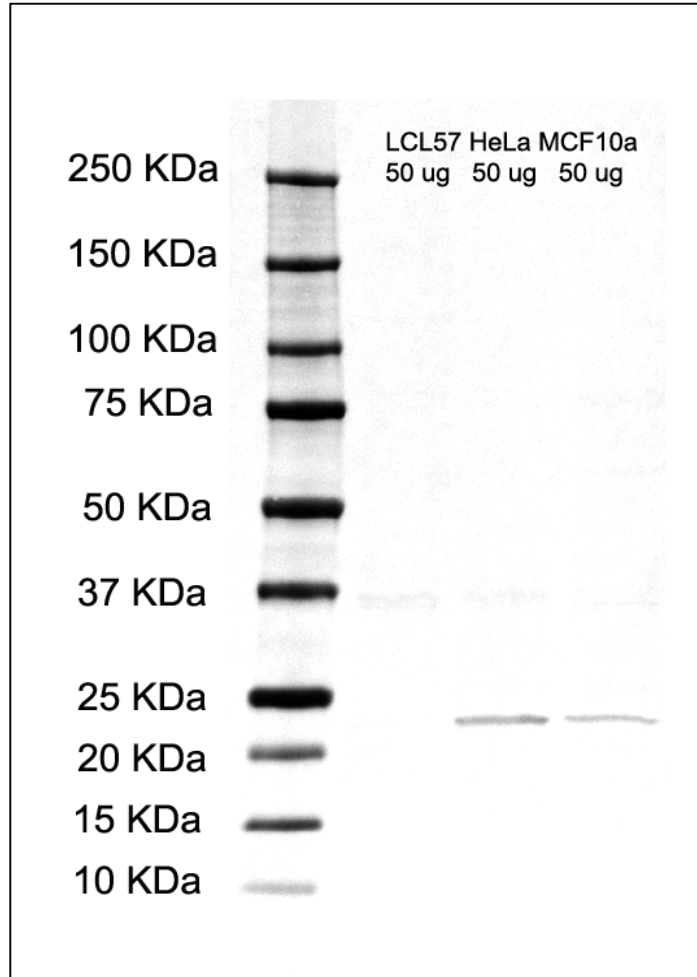

# Immunofluorescence - HeLa

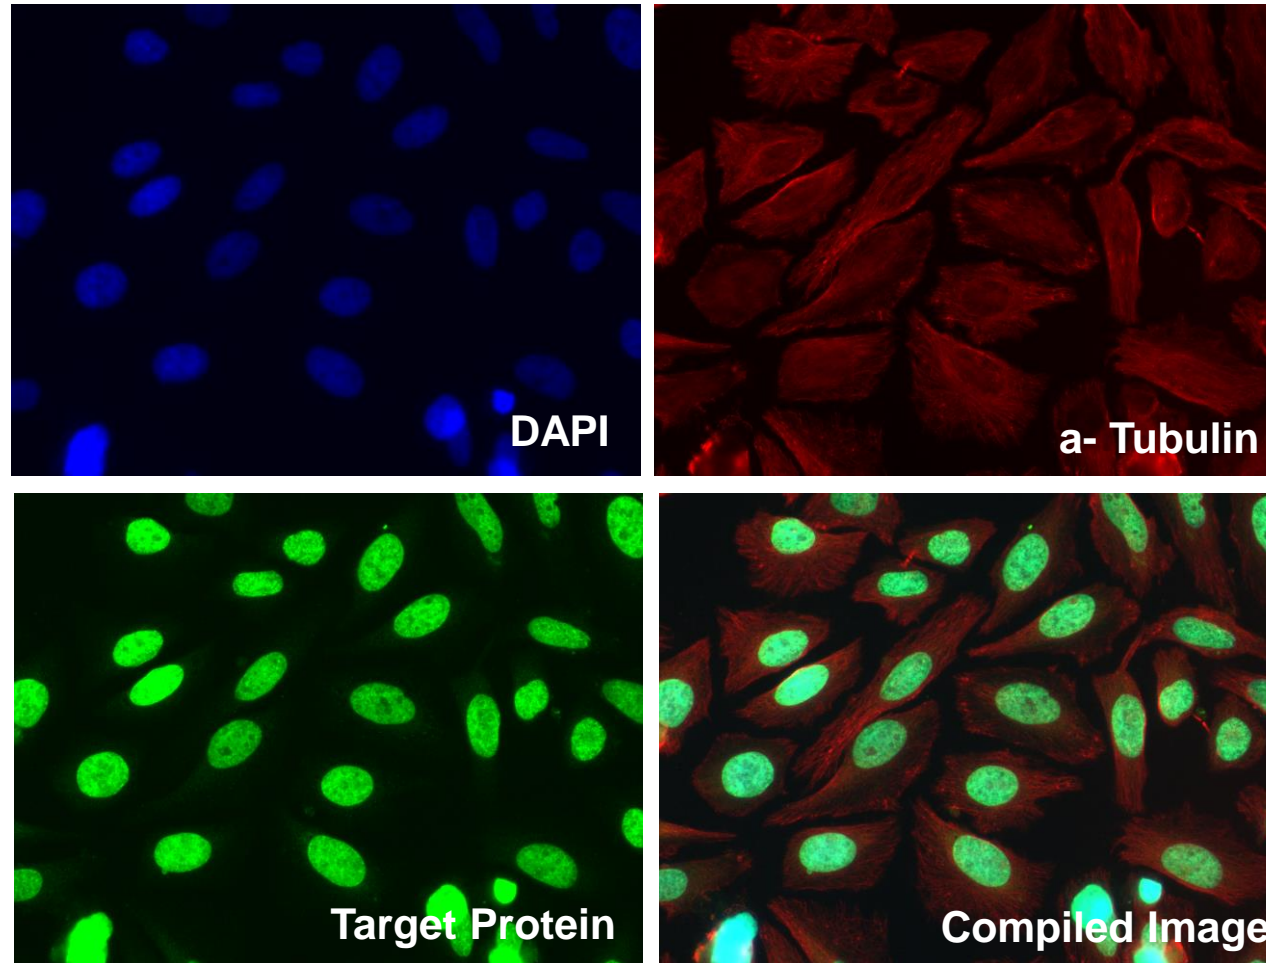

Subcellular Location: Nucleus, Other

# Immunofluorescence - MCF10A

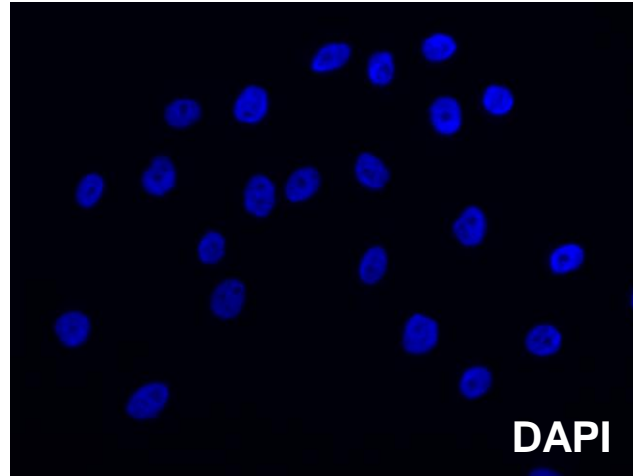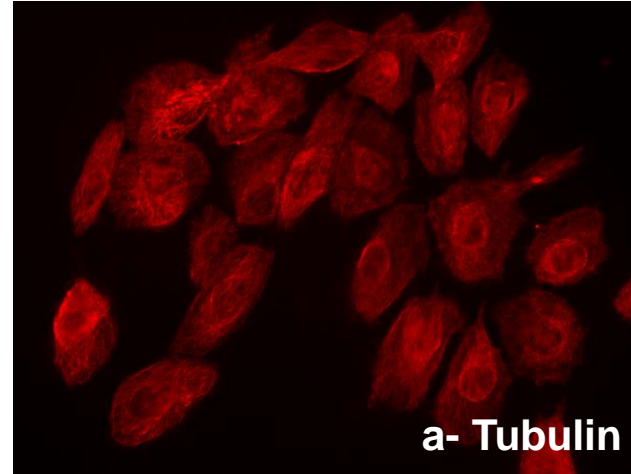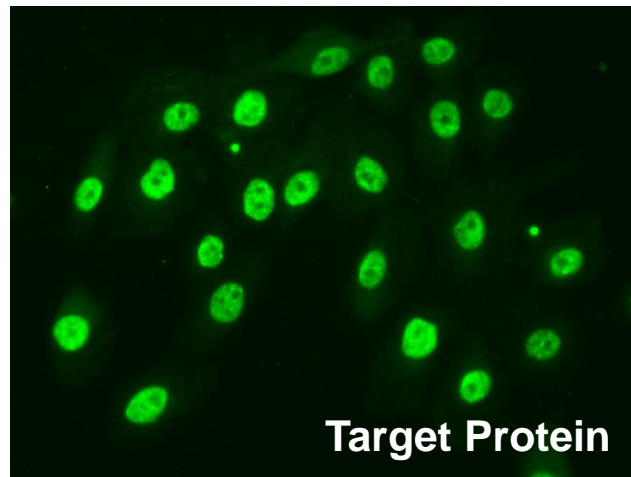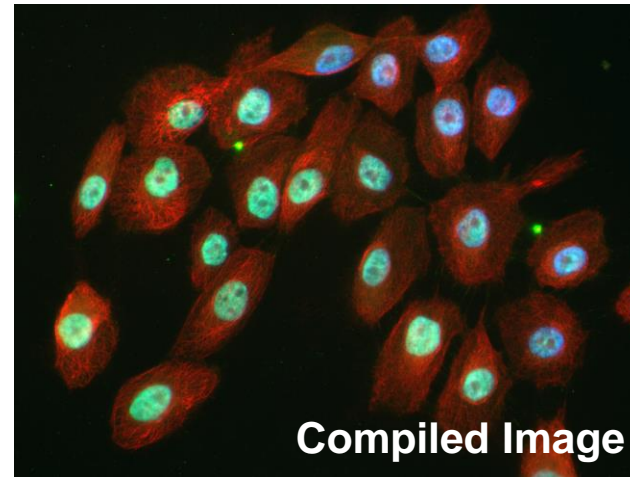

Subcellular Location: Nucleus, Other

# Immunofluorescence - LCL57

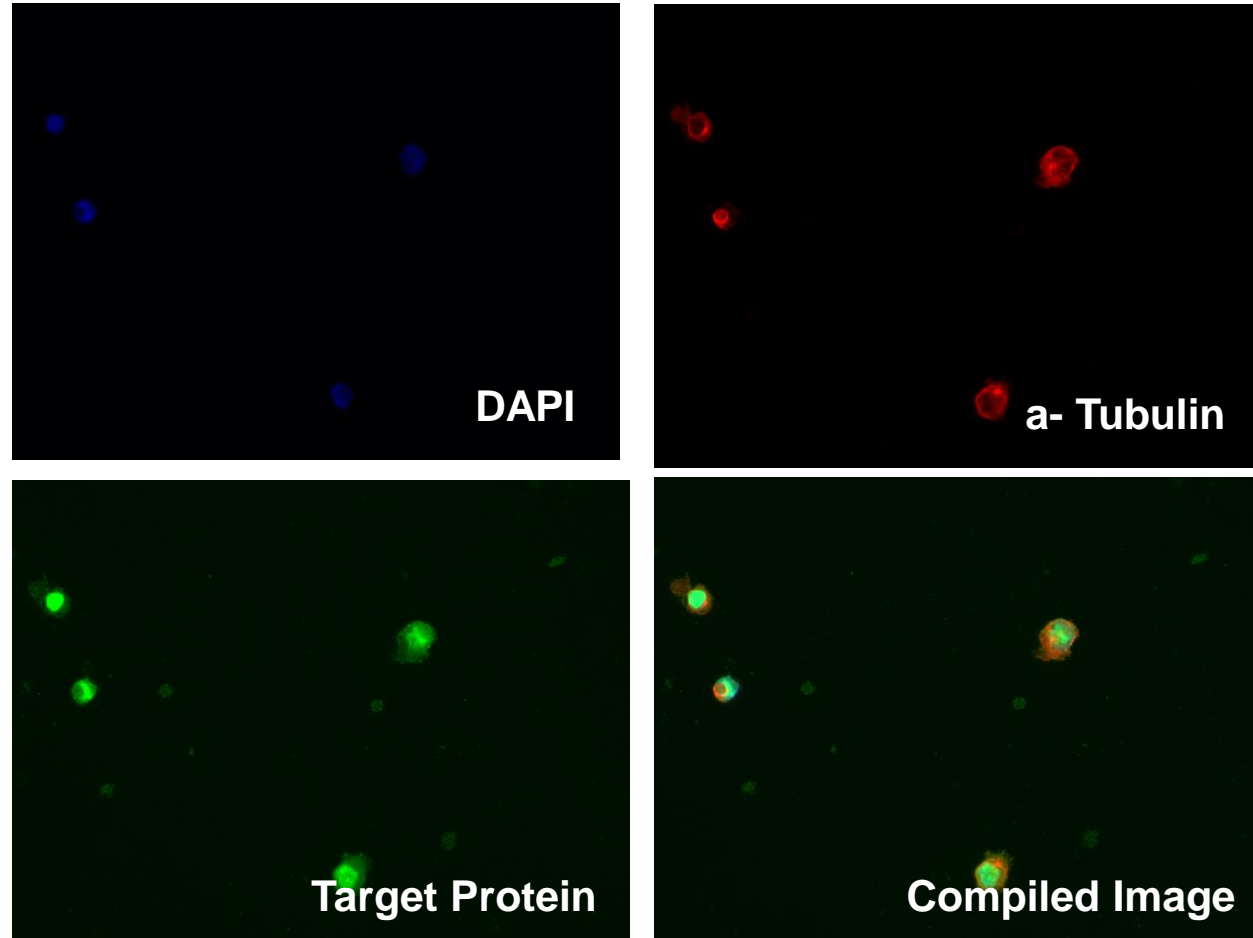

Subcellular Location: Nucleus, Other

# Single Cell Western Blot

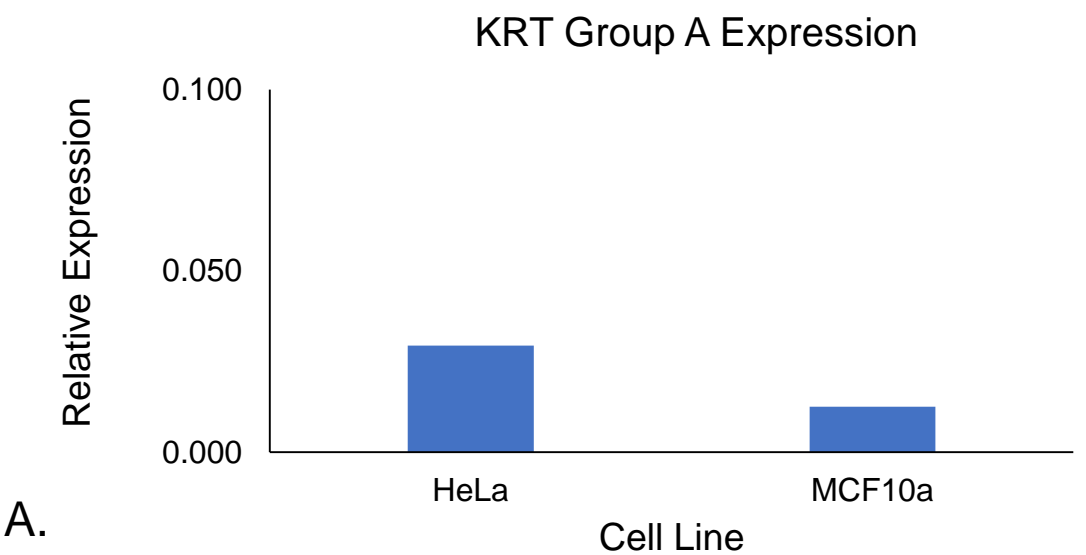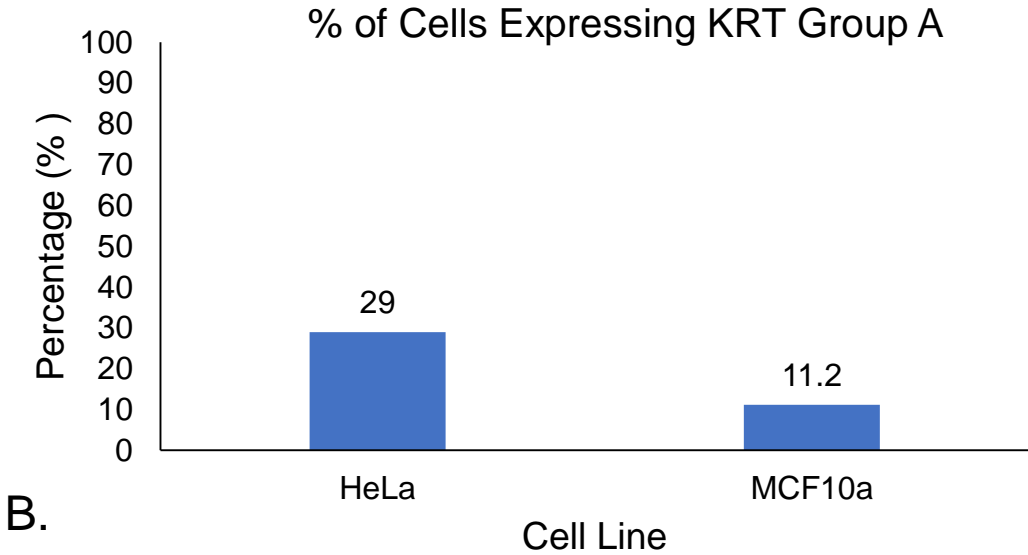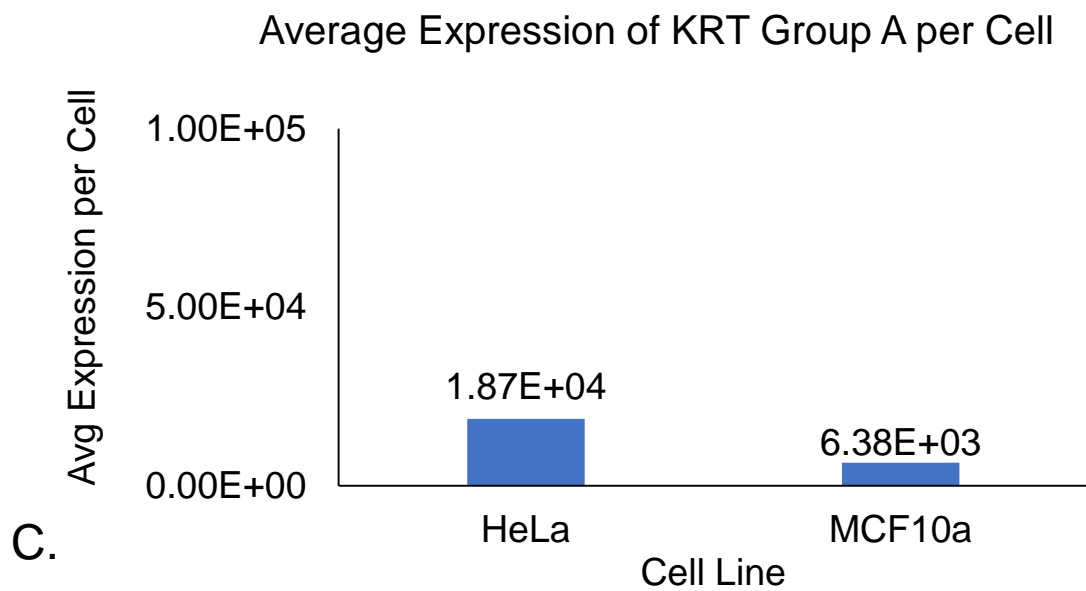

Single cell western blot data for KRT Group A (44 kDa band). Relative expression of total KRT Group A (44 kDa) in HeLa, MCF10A, and LCL57 cells (A). Percentage of cells that express KRT Group A (B). Average expression of KRT Group A protein per cell (C). All data is normalized to  $\beta$ -tubulin expression.

## 15. CPTC-KRT Group B-1

| Technique | Analyte | Result |
|-----------|---------|--------|
| WB        | RecProt | P      |
| Wes       | HeLa    | P      |
|           | MCF10A  | P      |
|           | LCL57   | N      |
|           |         |        |
| WB        | HeLa    | P      |
|           | MCF10A  | P      |
|           | LCL57   | N      |
| IF        | HeLa    | P      |
|           | MCF10A  | P      |
|           | LCL57   | N†     |
| SCWB      | HeLa    | P      |
|           | MCF10A  | P      |
|           | LCL57   | N†     |
| IP*       | RecProt | P      |
| IP*       | HeLa    | P      |
|           | MCF10A  | N      |
|           | LCL57   | N      |
| IHC       |         | P      |
| NCI60     |         | P      |

P – Positive, N – Negative, \* Please refer to tables for results, † Data not shown



# WB against commercial recombinant protein

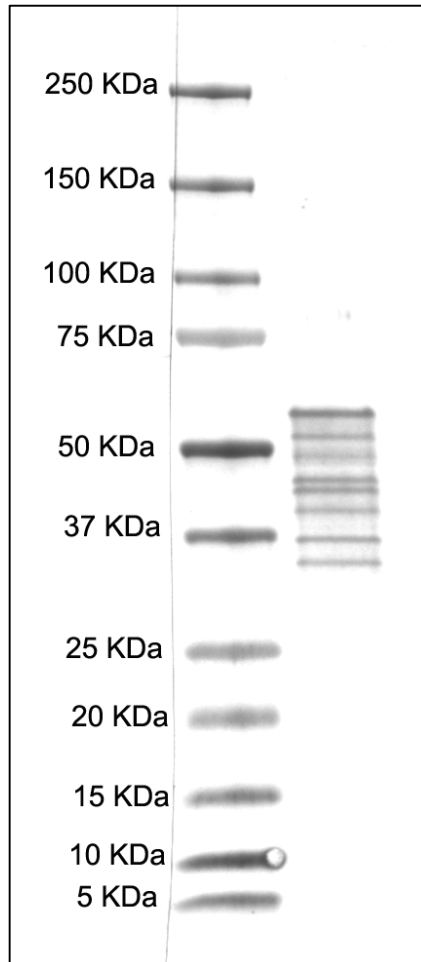

Ag Vendor: Origene

Cat #: TP309570

Description: Recombinant protein of human keratin 8 (KRT8)

Predicted MW 53.7 KDa

## Endogenous WB

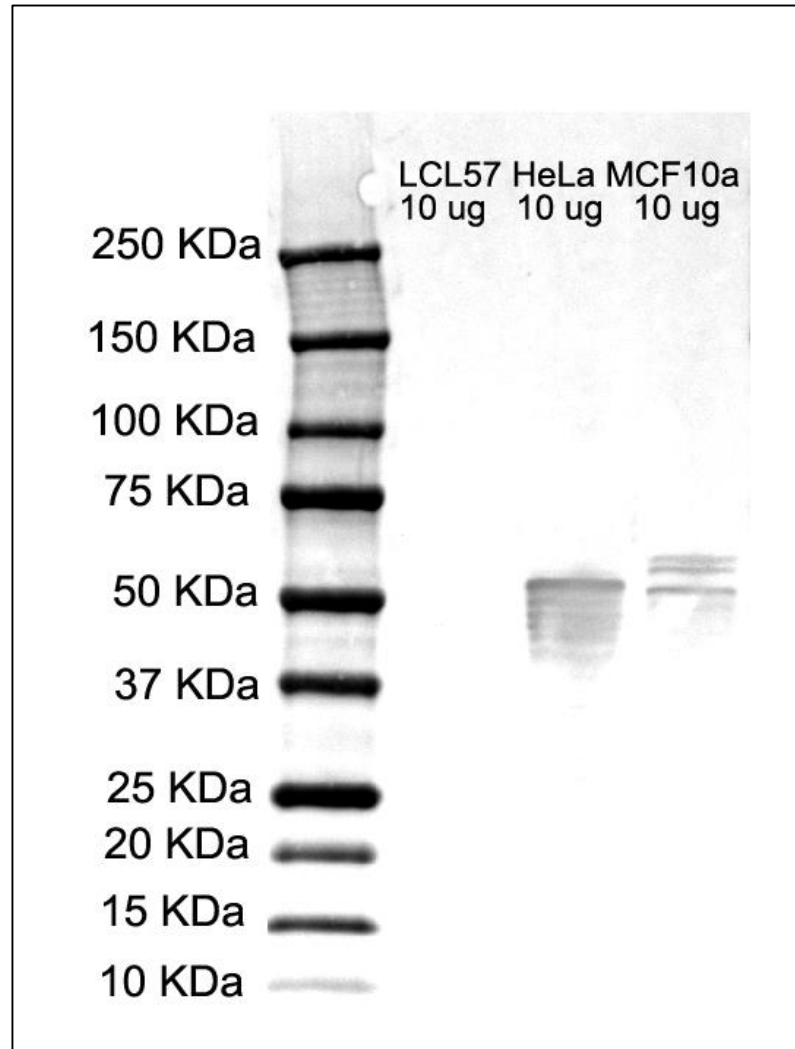

## Endogenous Wes

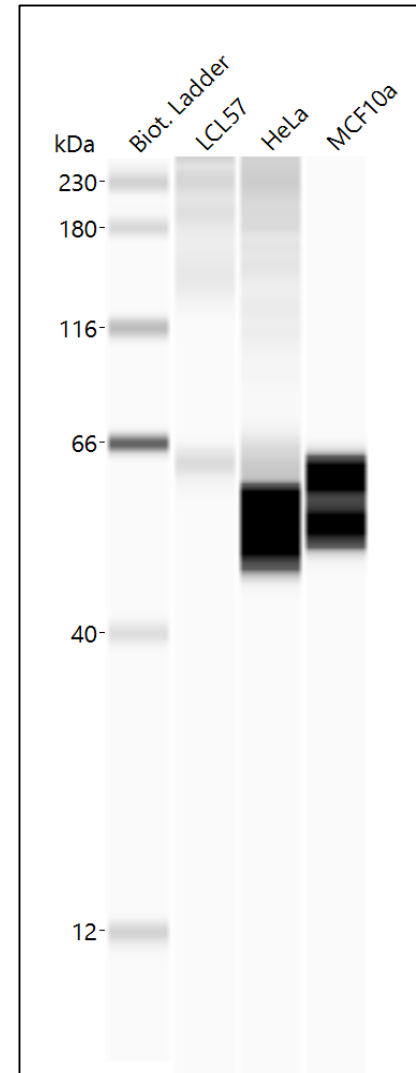

# Immunofluorescence - HeLa

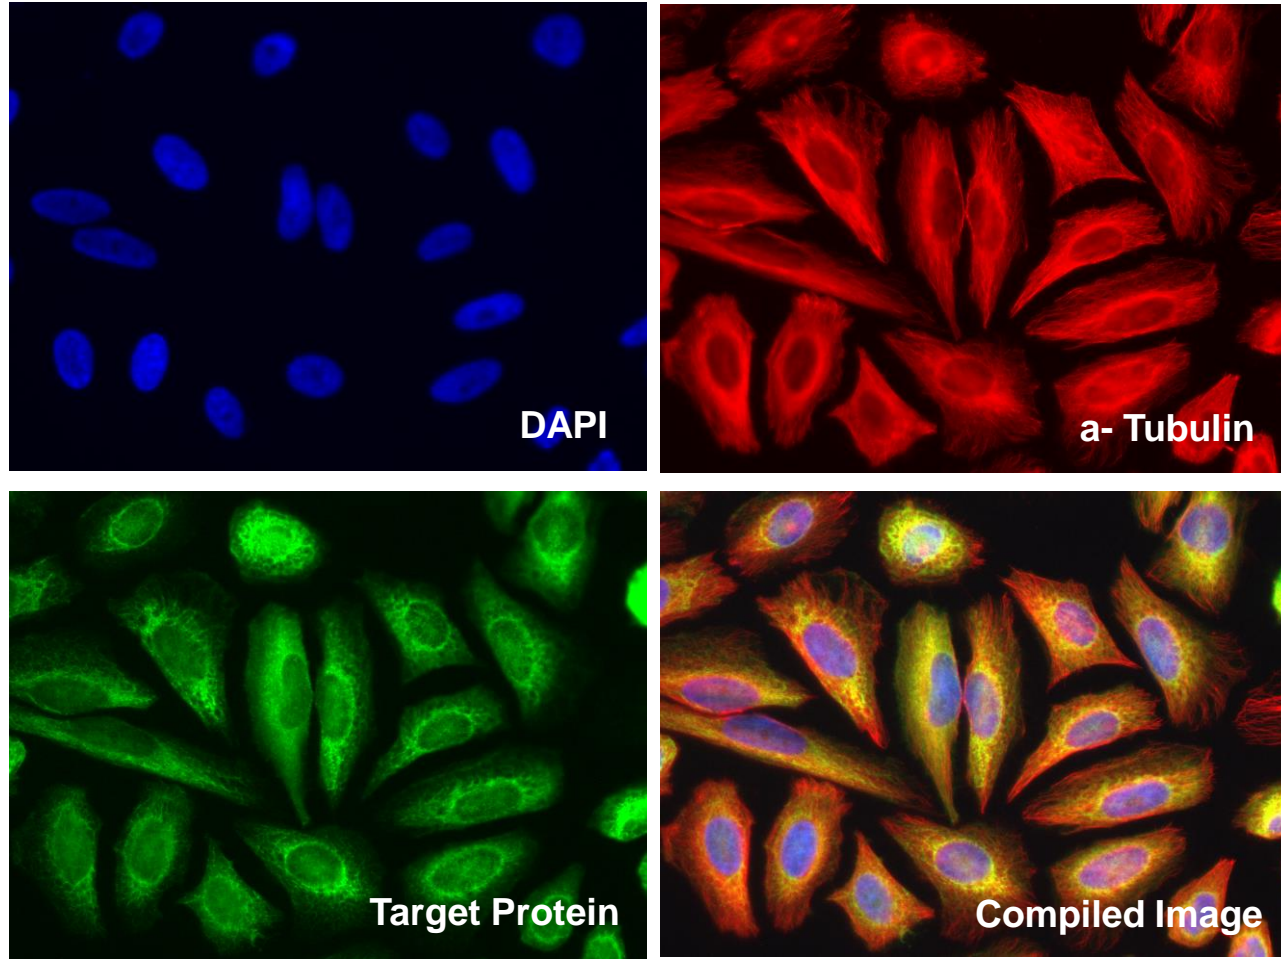

Subcellular Locations: Cytoskeleton, Cytosol, Extracellular region or secreted, Other

# Immunofluorescence - MCF10A

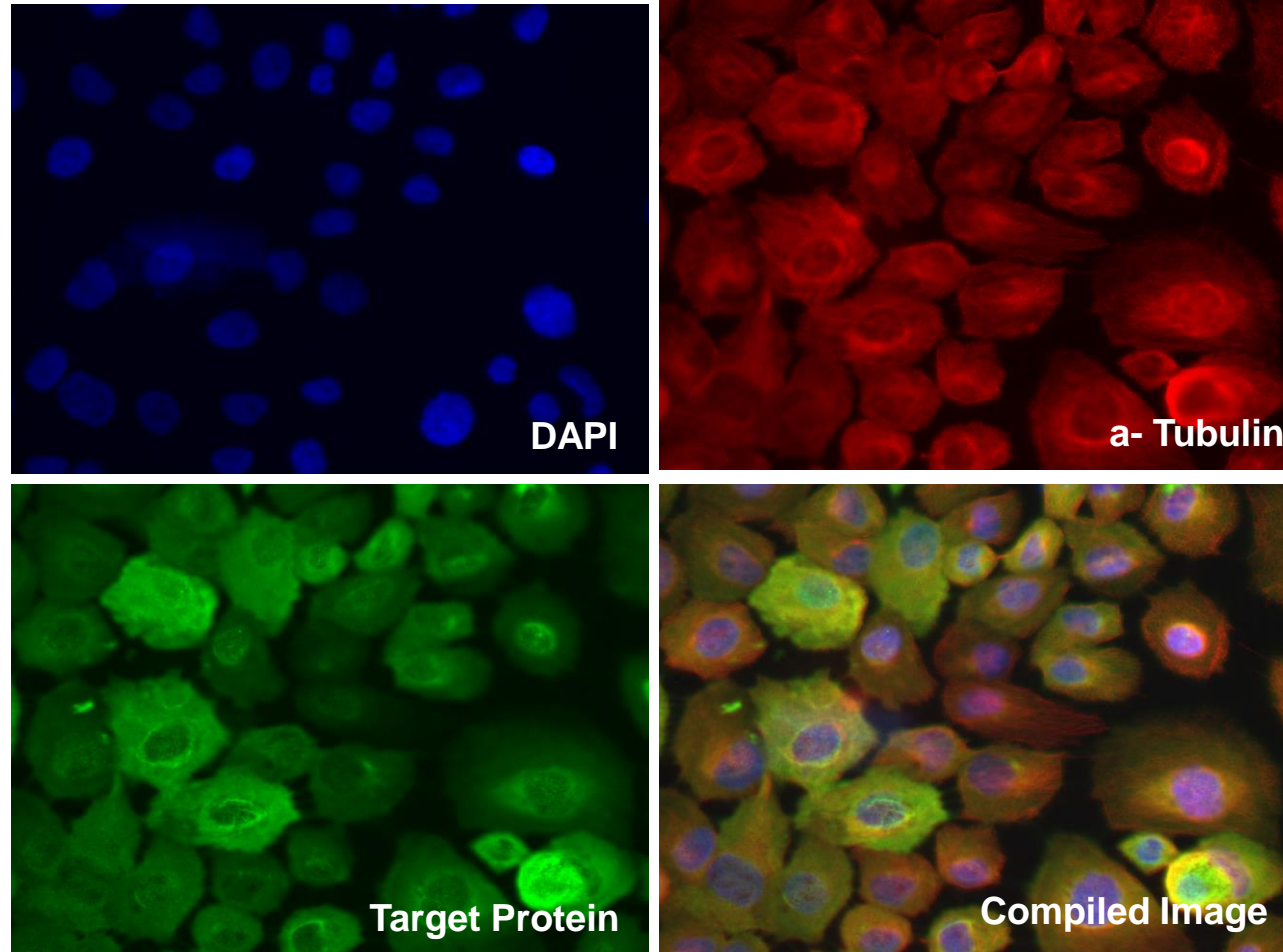

Subcellular Locations: Cytoskeleton, Cytosol, Extracellular region or secreted, Other

# CPTC- KRT Group B-1

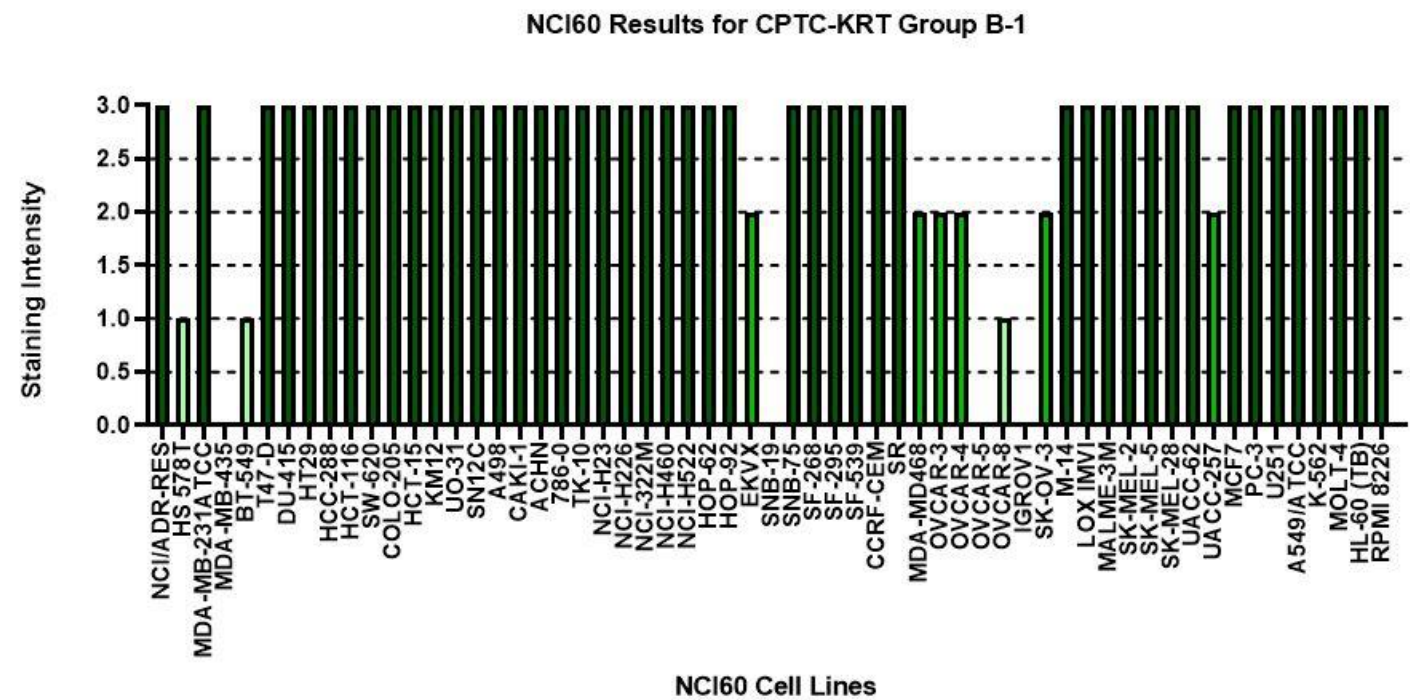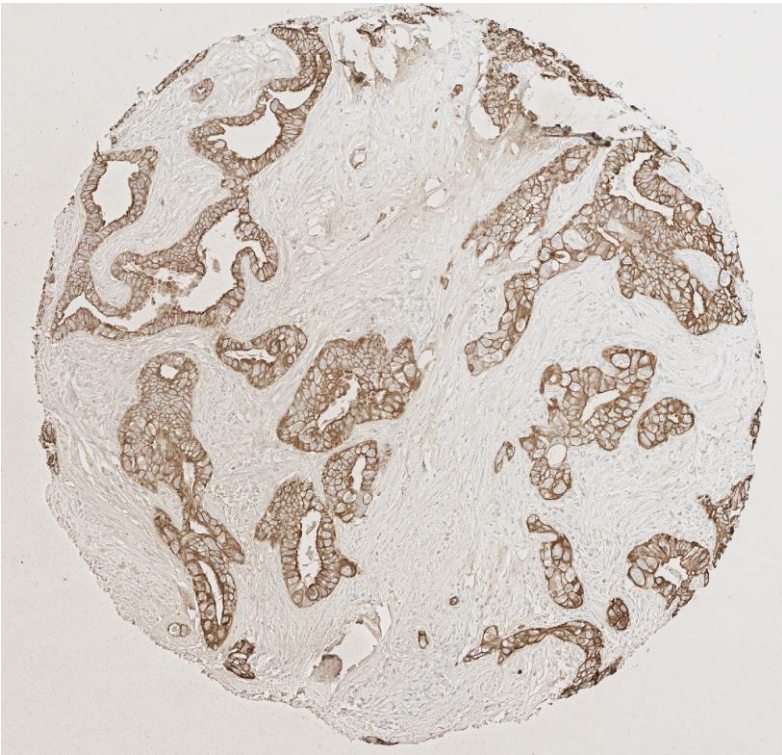



## 16. CPTC-LAT-1

| Technique | Analyte | Result |
|-----------|---------|--------|
| WB        | RecProt | P      |
| Wes       | HeLa    | N      |
|           | MCF10A  | N      |
|           | LCL57   | N      |
| WB        | HeLa    | P      |
|           | MCF10A  | P      |
|           | LCL57   | P      |
| IF†       | HeLa    | N      |
|           | MCF10A  | N      |
|           | LCL57   | N      |
| SCWB†     | HeLa    | N      |
|           | MCF10A  | N      |
|           | LCL57   | N      |
| IP*       | RecProt | W      |
| IP*       | HeLa    | N      |
|           | MCF10A  | N      |
|           | LCL57   | N      |
| IHC       |         | P      |
| NCI60     |         | P      |

P – Positive, N – Negative, W – Weak, \* Please refer to tables for results, † Data not shown

# WB against commercial recombinant protein

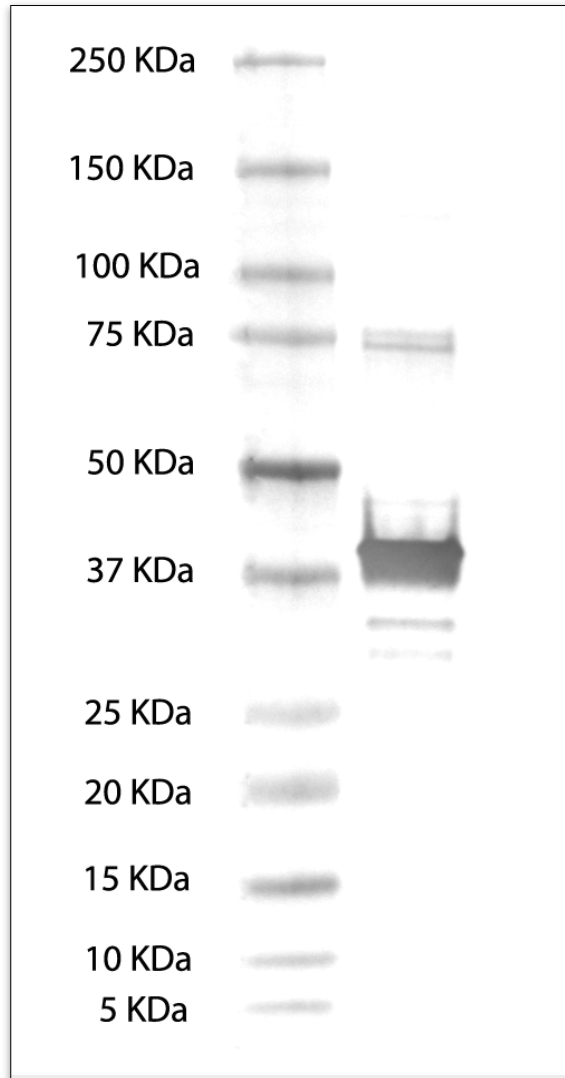

Ag Vendor: Novus Biologicals

Cat #: NBP1-72479

Description: Recombinant Human LAT Protein

Predicted MW 24.4 KDa

# Endogenous WB

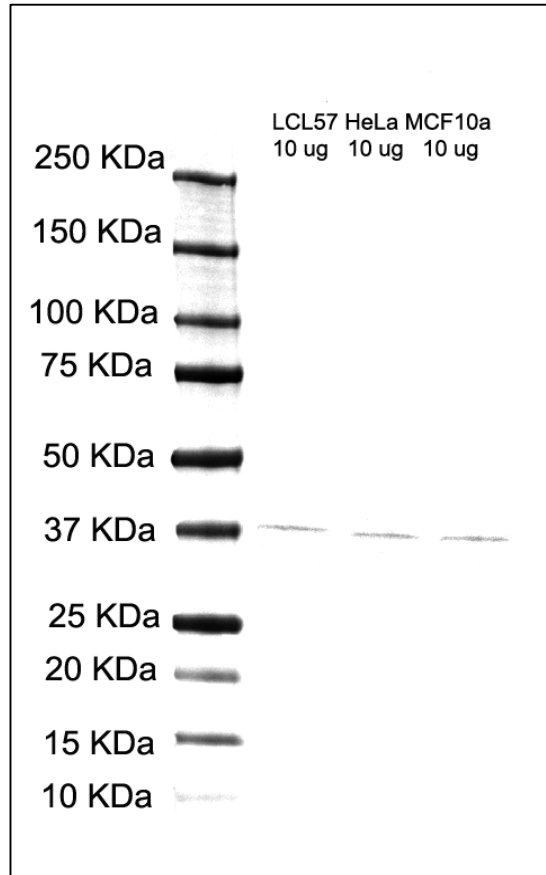

# Endogenous Wes

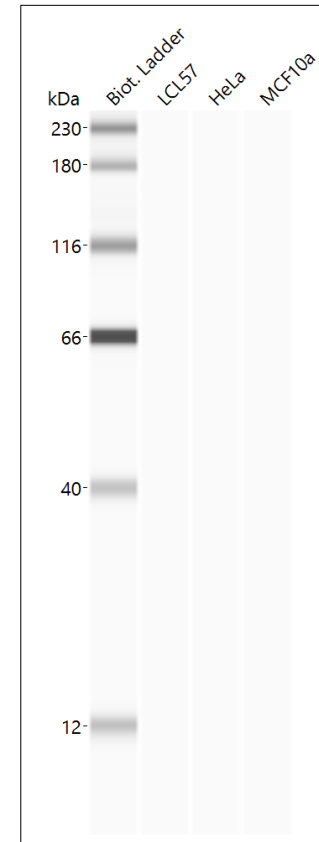



# CPTC-LAT-1

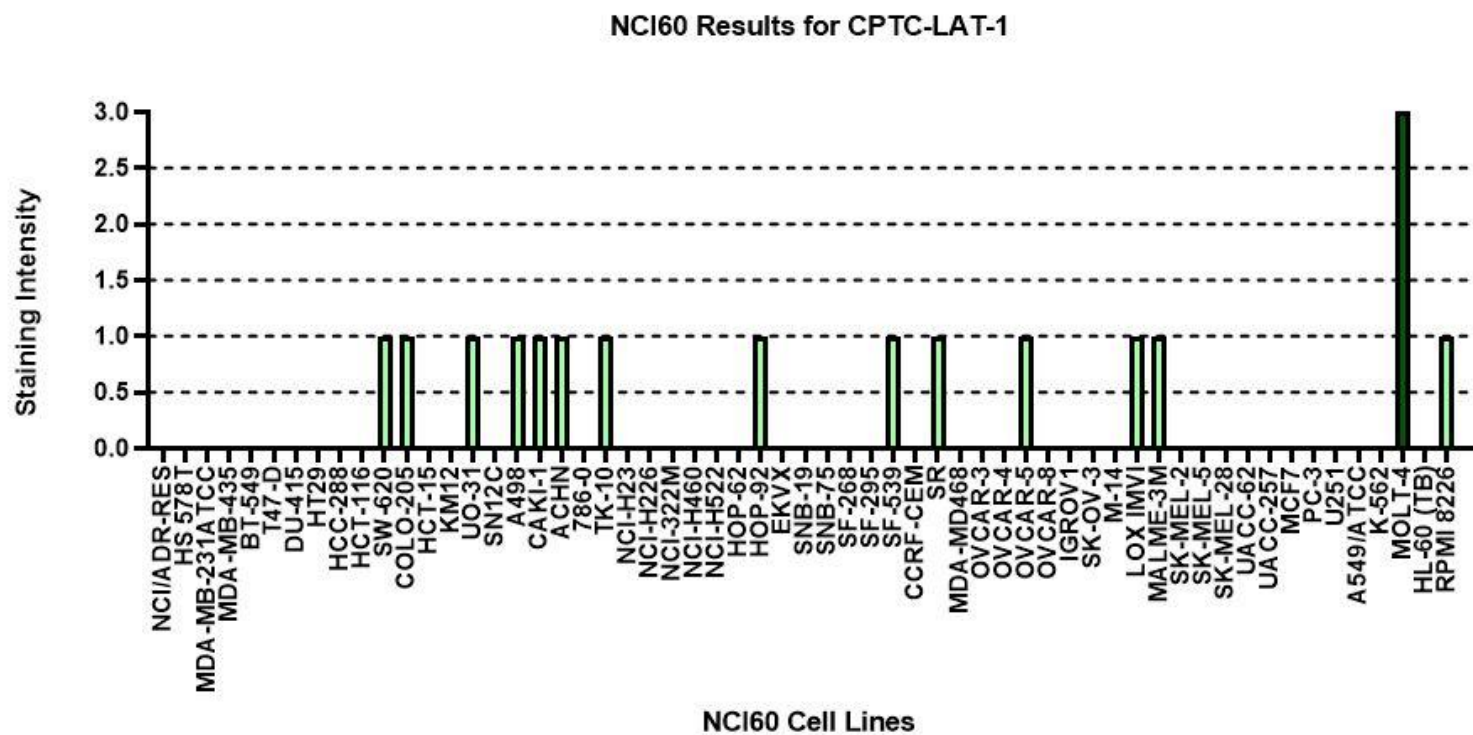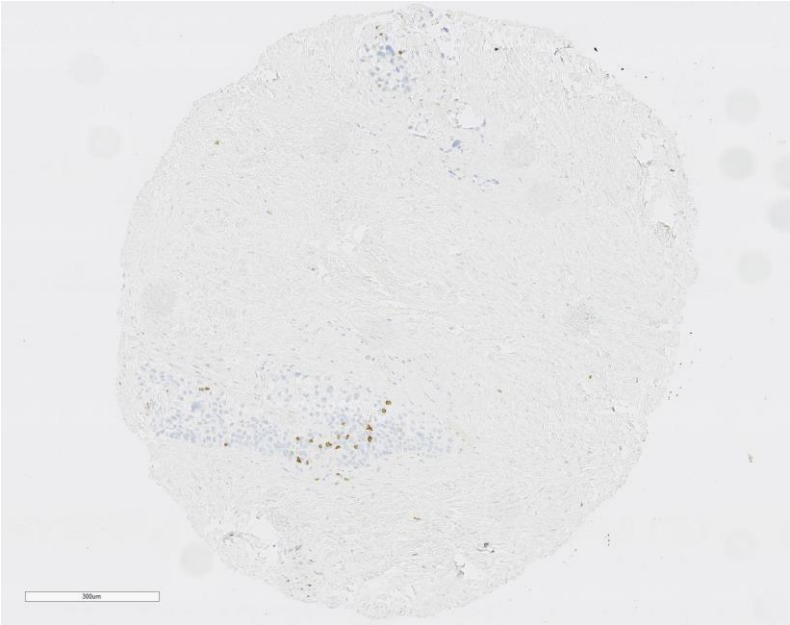

## 17. CPTC-LIME1-1

| Technique | Analyte | Result    |
|-----------|---------|-----------|
| WB        | RecProt | <b>N*</b> |
| West†     | HeLa    | <b>N</b>  |
|           | MCF10A  | <b>N</b>  |
|           | LCL57   | <b>N</b>  |
| WB        | HeLa    | <b>NT</b> |
|           | MCF10A  | <b>NT</b> |
|           | LCL57   | <b>NT</b> |
| IF        | HeLa    | <b>NT</b> |
|           | MCF10A  | <b>NT</b> |
|           | LCL57   | <b>NT</b> |
| SCWB      | HeLa    | <b>NT</b> |
|           | MCF10A  | <b>NT</b> |
|           | LCL57   | <b>NT</b> |
| IP        | RecProt | <b>NT</b> |
| IP        | HeLa    | <b>NT</b> |
|           | MCF10A  | <b>NT</b> |
|           | LCL57   | <b>NT</b> |
| IHC       |         | <b>N*</b> |
| NCI60     |         | <b>NT</b> |

N – Negative, NT – Not Tested, \* Data not shown

† Data shown are from Phospho-specificity Experiment.

# Endogenous Wes

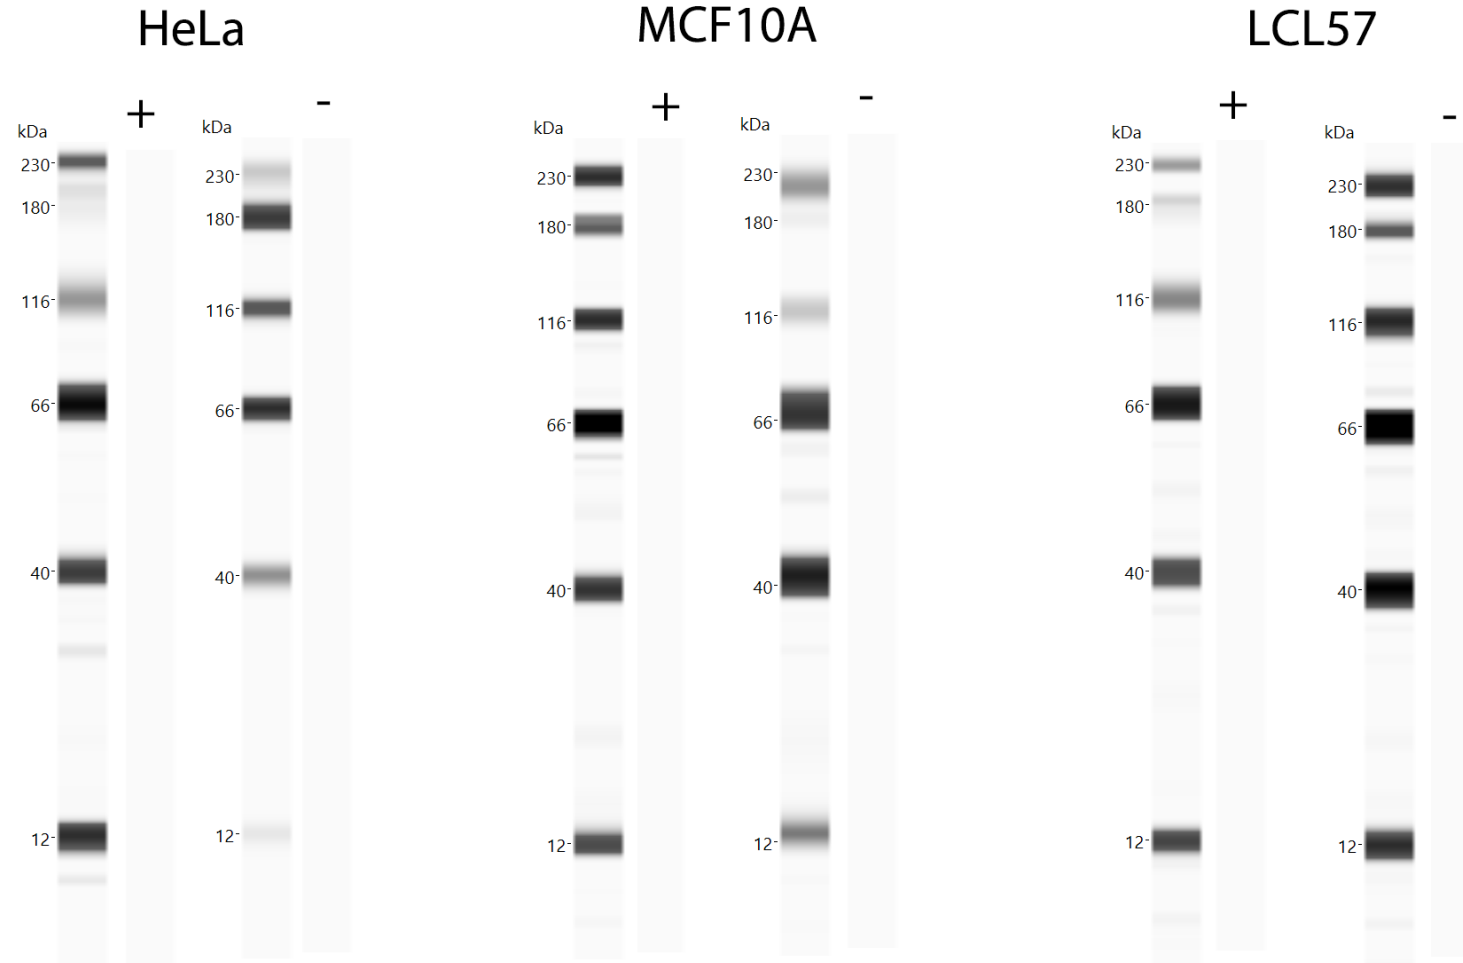

Expected molecular weight: 31, 21 kDa

+ : irradiation treated cells  
- : not treated cells

## 18. CPTC-LMNB1-1

| Technique | Analyte | Result    |
|-----------|---------|-----------|
| WB        | RecProt | <b>N*</b> |
| West†     | HeLa    | <b>N</b>  |
|           | MCF10A  | <b>N</b>  |
|           | LCL57   | <b>N</b>  |
| WB        | HeLa    | <b>NT</b> |
|           | MCF10A  | <b>NT</b> |
|           | LCL57   | <b>NT</b> |
| IF        | HeLa    | <b>NT</b> |
|           | MCF10A  | <b>NT</b> |
|           | LCL57   | <b>NT</b> |
| SCWB      | HeLa    | <b>NT</b> |
|           | MCF10A  | <b>NT</b> |
|           | LCL57   | <b>NT</b> |
| IP        | RecProt | <b>NT</b> |
| IP        | HeLa    | <b>NT</b> |
|           | MCF10A  | <b>NT</b> |
|           | LCL57   | <b>NT</b> |
| IHC       |         | <b>P</b>  |
| NCI60     |         | <b>P</b>  |

N – Negative, NT – Not Tested, \* Data not shown  
 † Data shown are from Phospho-specificity Experiment.

# Endogenous Wes

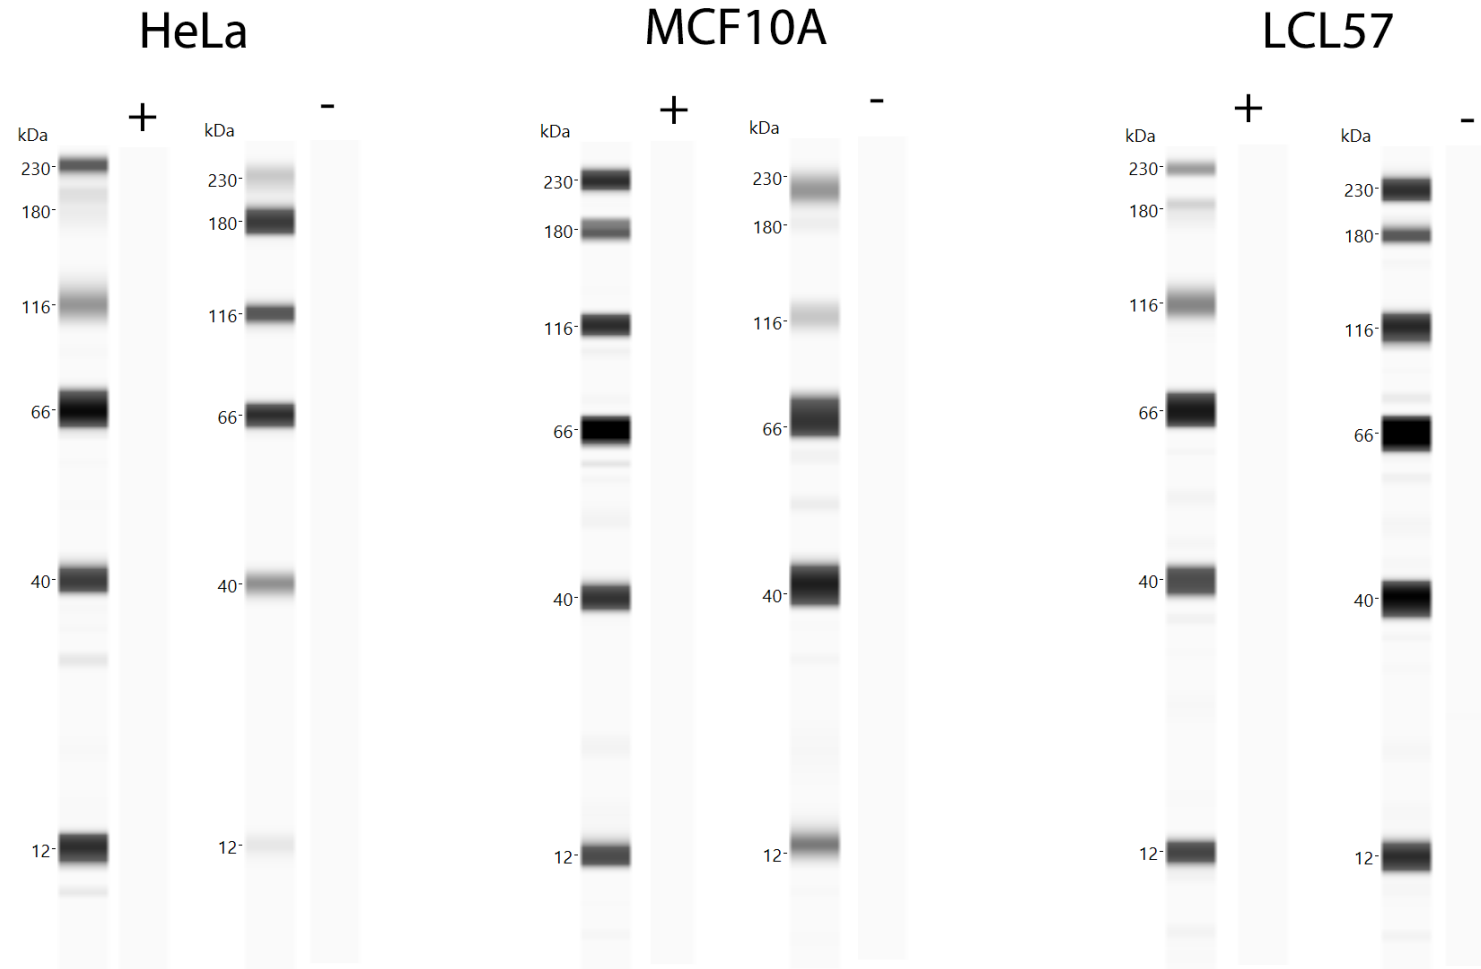

Expected molecular weight: 66 kDa

+ : irradiation treated cells  
- : not treated cells

# CPTC-LMNB1-1

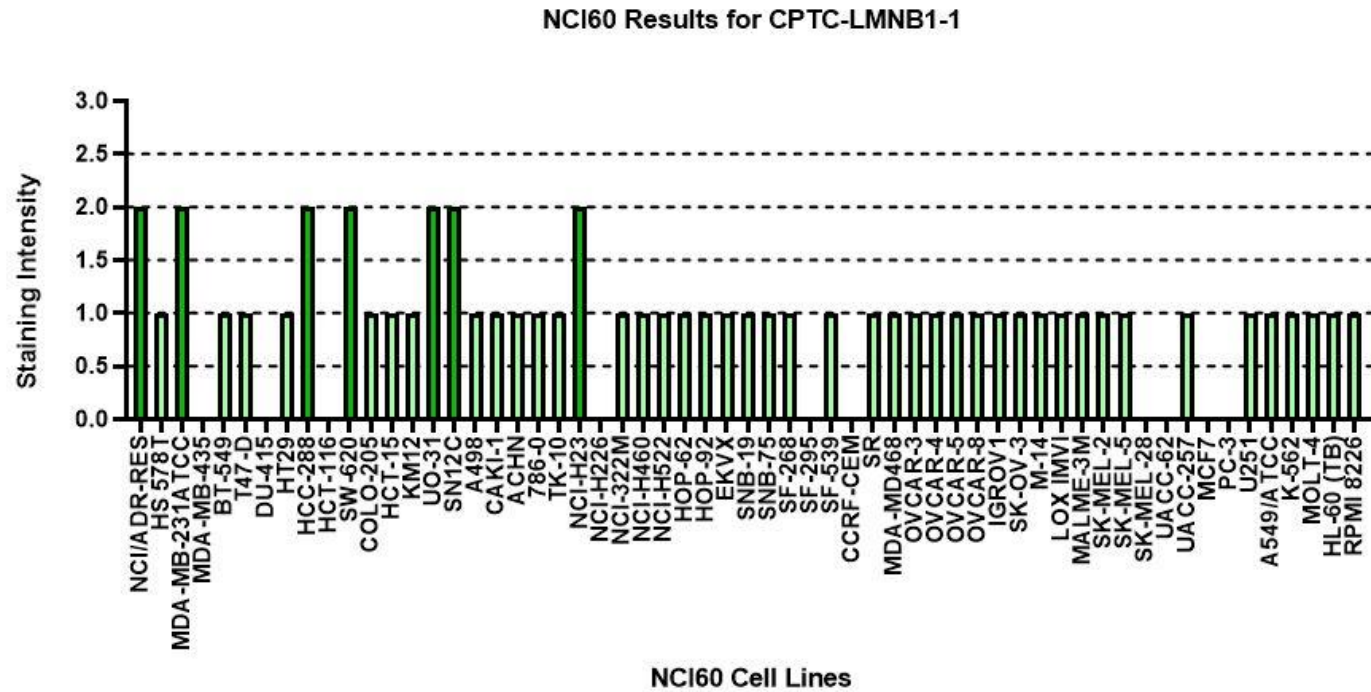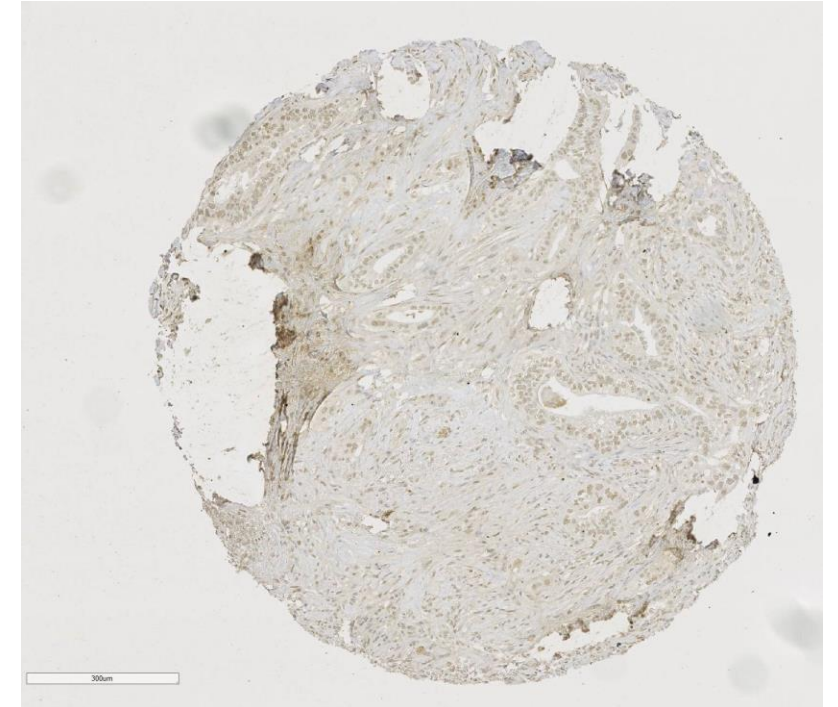

## 19. CPTC-LMNB1-2

| Technique | Analyte | Result |
|-----------|---------|--------|
| WB        | RecProt | P      |
| Wes       | HeLa    | N      |
|           | MCF10A  | N      |
|           | LCL57   | N      |
| WB        | HeLa    | P      |
|           | MCF10A  | P      |
|           | LCL57   | P      |
| IF        | HeLa    | P      |
|           | MCF10A  | P      |
|           | LCL57   | P      |
| SCWB      | HeLa    | P      |
|           | MCF10A  | P      |
|           | LCL57   | P      |
| IP*       | RecProt | P      |
| IP*       | HeLa    | N      |
|           | MCF10A  | N      |
|           | LCL57   | N      |
| IHC       |         | N†     |
| NCI60     |         | NT     |

P – Positive, N – Negative, \*Please refer to tables for results, † Data not shown

# WB against commercial recombinant protein

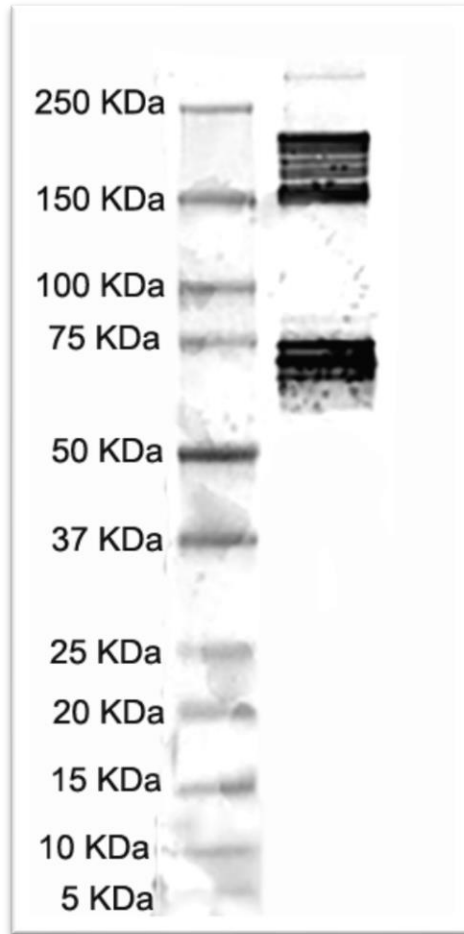

Ag Vendor: Origene

Cat #: TP301604

Description: Lamin B1 (LMNB1) (NM\_005573) Human Recombinant Protein

Predicted MW 66.2 KDa



## Endogenous WB

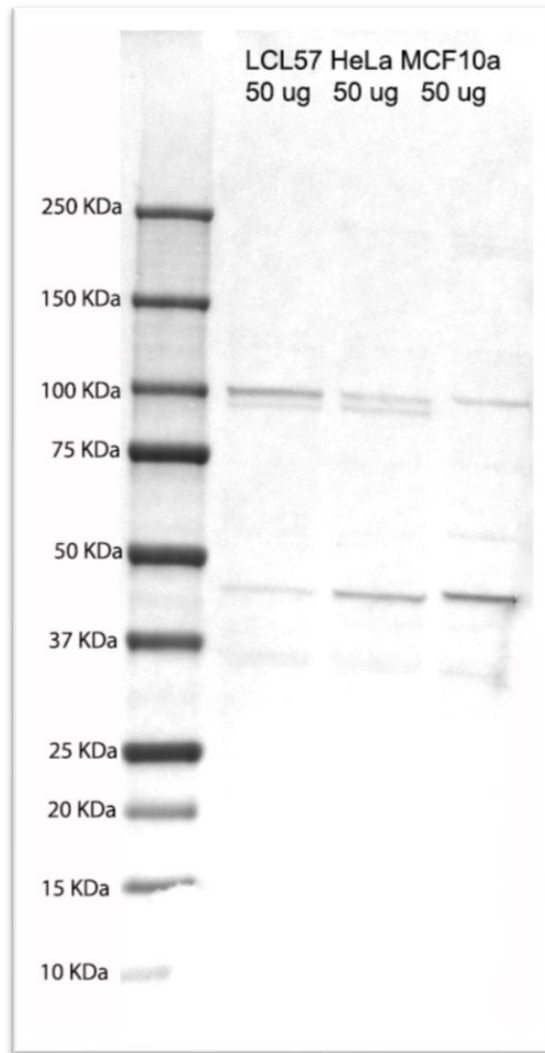

## Endogenous Wes

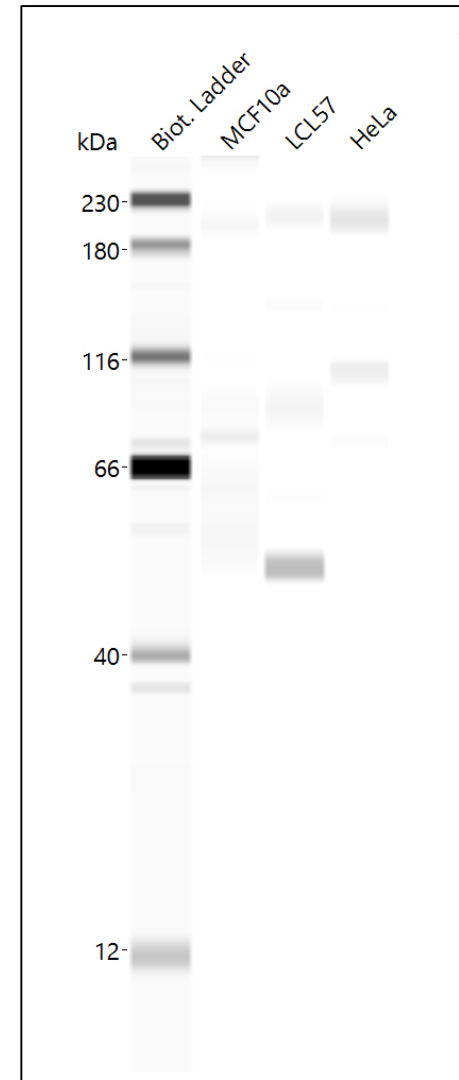

# Immunofluorescence - HeLa

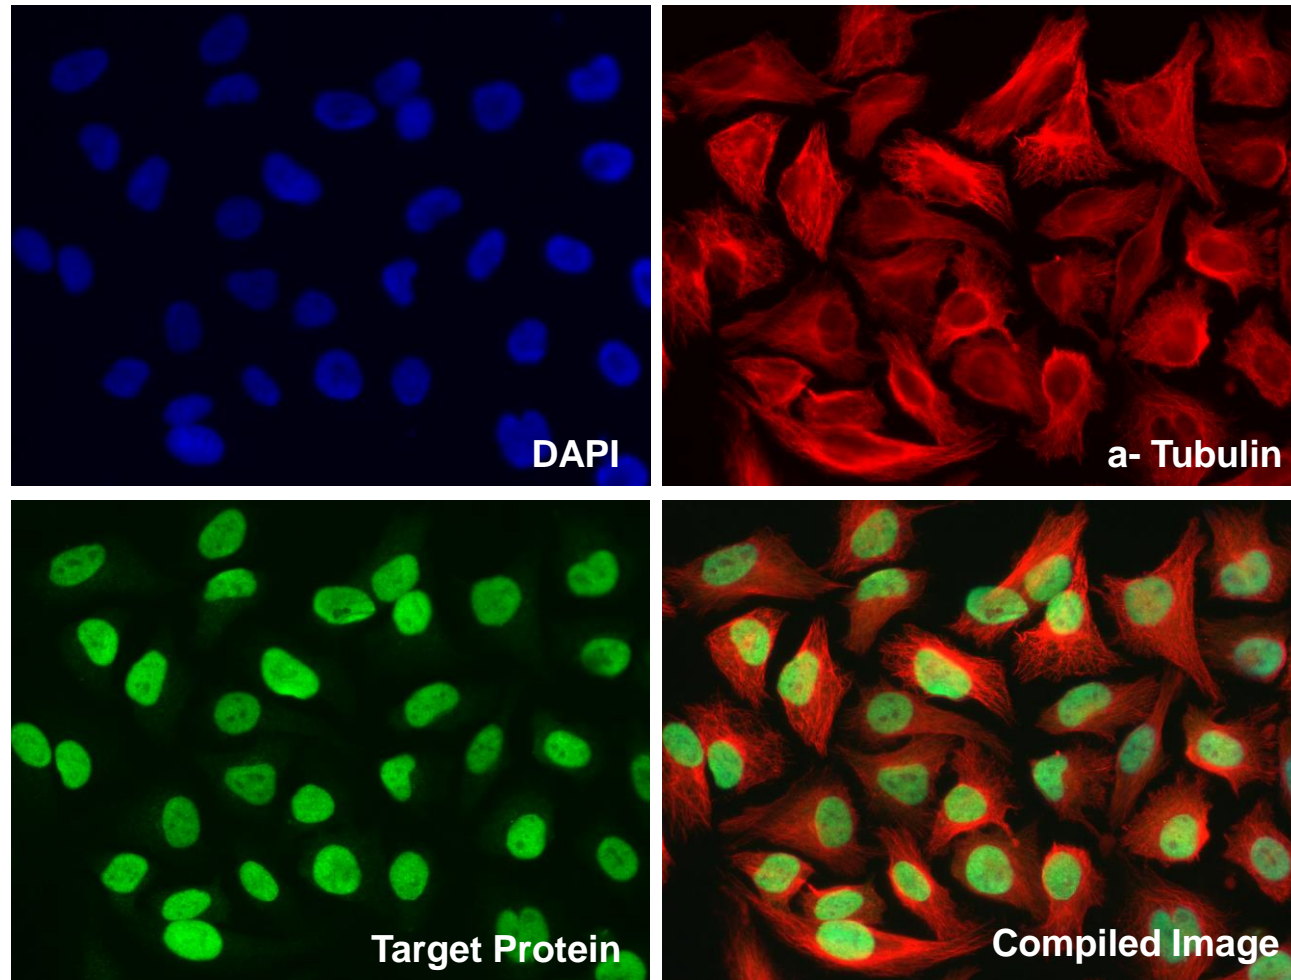

Subcellular location: Nucleus

# Immunofluorescence – MCF10A

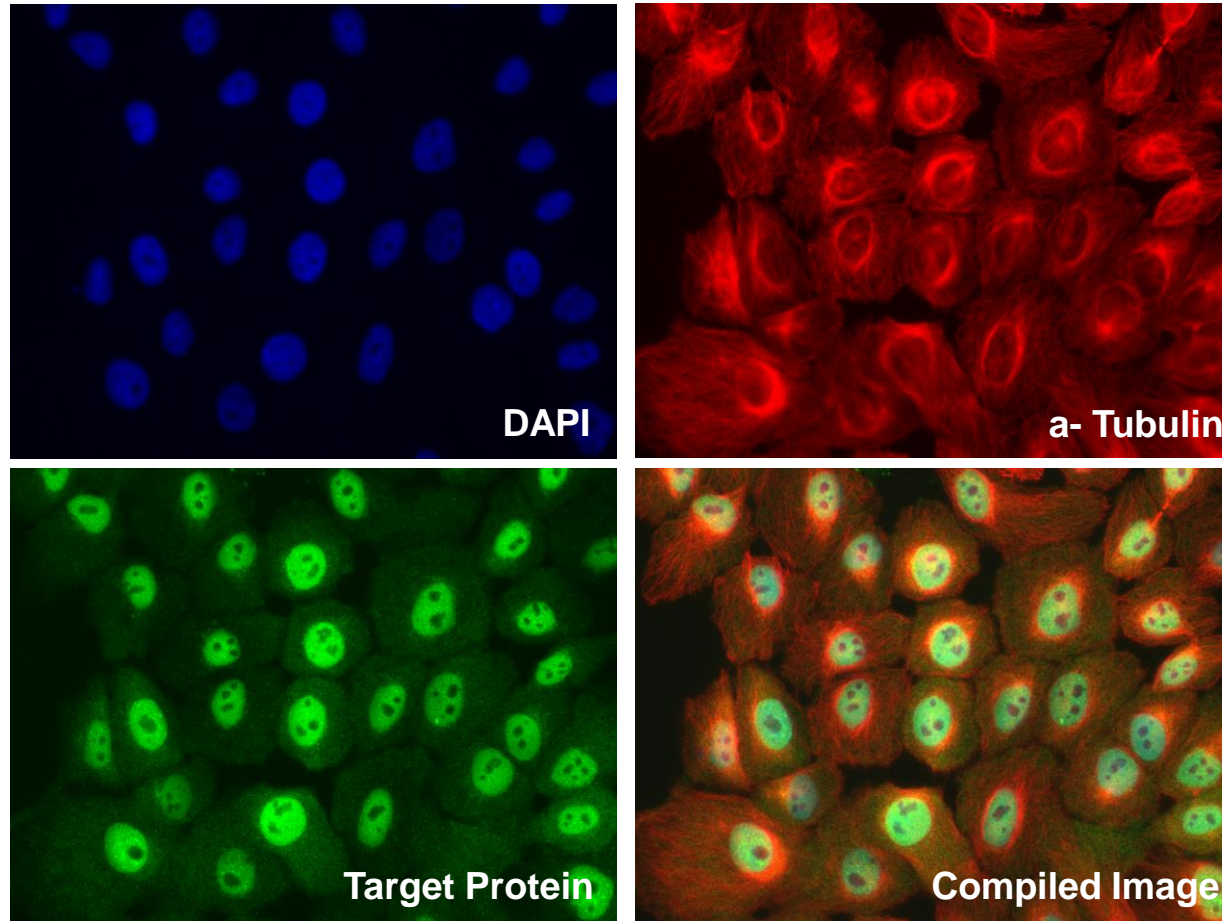

Subcellular location: Nucleus

# Immunofluorescence – LCL57

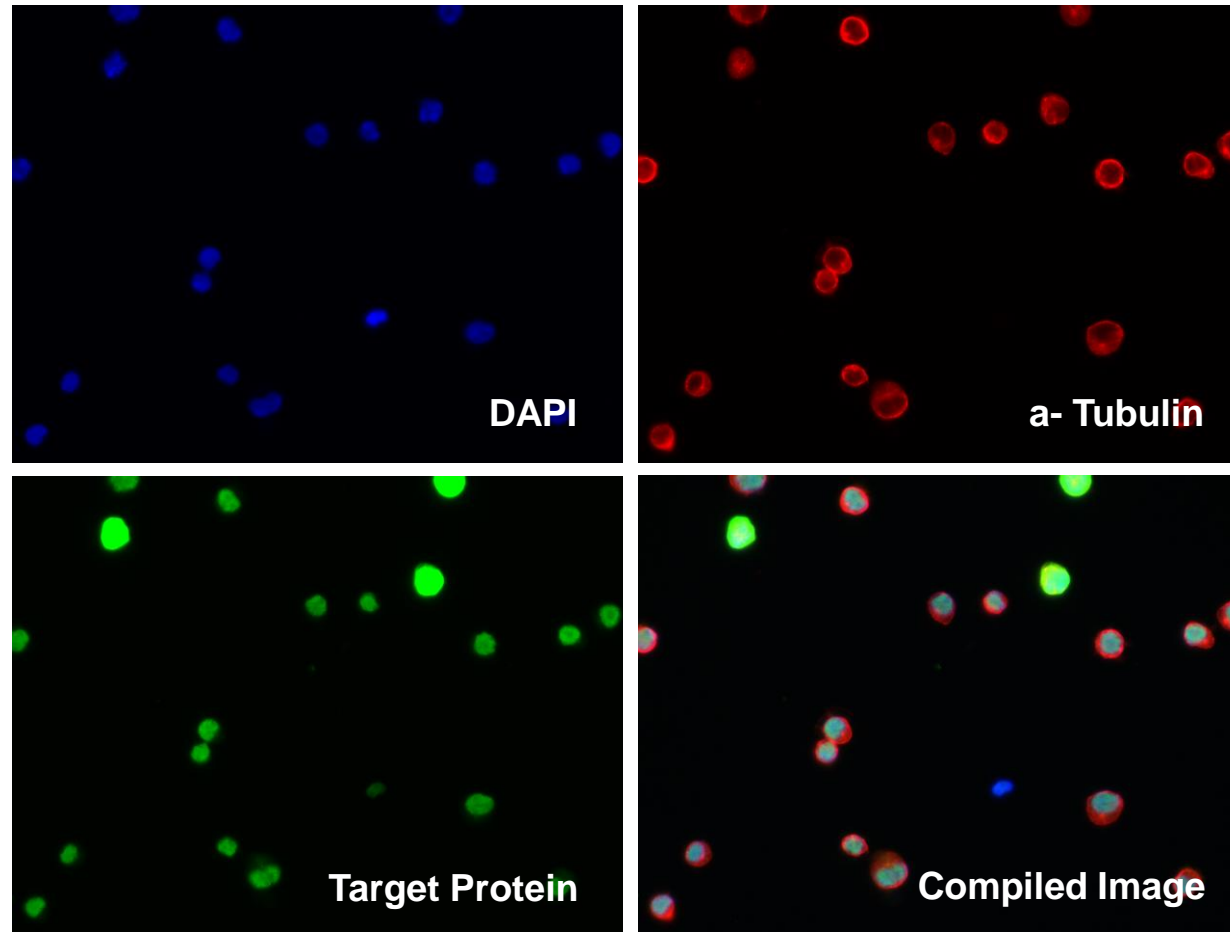

Subcellular location: Nucleus

# Single Cell Western Blot

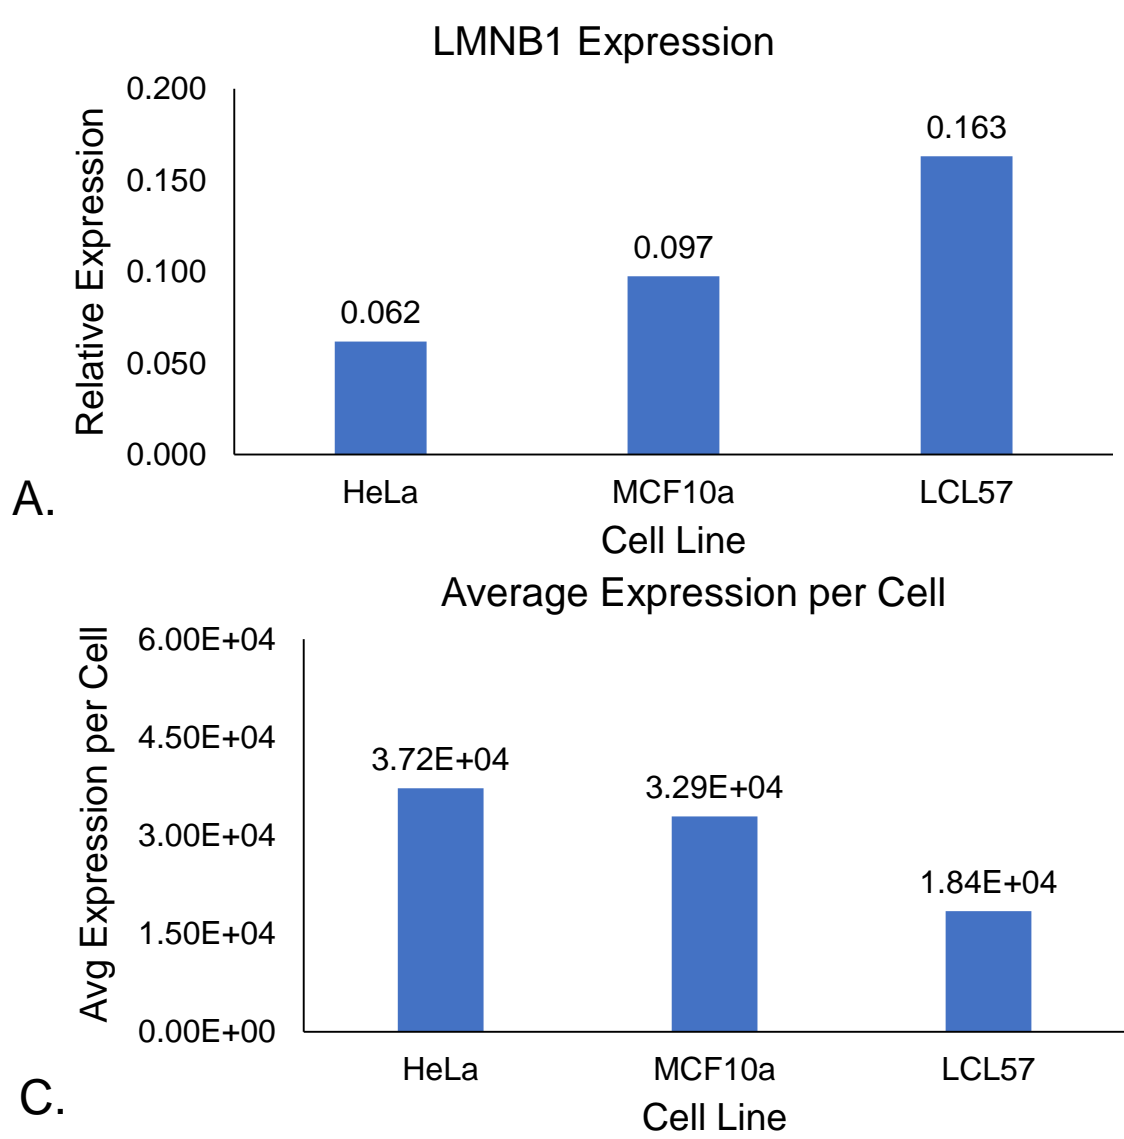

Single cell western blot data for LMNB1 (66 kDa band). Relative expression of total LMNB1 (66 kDa) in HeLa, MCF10A, and LCL57 cells (A). Percentage of cells that express LMNB1 (B). Average expression of LMNB1 protein per cell (C). All data is normalized to  $\beta$ -tubulin expression.

## 20. CPTC-MCM6-1

| Technique | Analyte | Result    |
|-----------|---------|-----------|
| WB        | RecProt | <b>N*</b> |
| West†     | HeLa    | <b>N</b>  |
|           | MCF10A  | <b>N</b>  |
|           | LCL57   | <b>N</b>  |
| WB        | HeLa    | <b>NT</b> |
|           | MCF10A  | <b>NT</b> |
|           | LCL57   | <b>NT</b> |
| IF        | HeLa    | <b>NT</b> |
|           | MCF10A  | <b>NT</b> |
|           | LCL57   | <b>NT</b> |
| SCWB      | HeLa    | <b>NT</b> |
|           | MCF10A  | <b>NT</b> |
|           | LCL57   | <b>NT</b> |
| IP        | RecProt | <b>NT</b> |
| IP        | HeLa    | <b>NT</b> |
|           | MCF10A  | <b>NT</b> |
|           | LCL57   | <b>NT</b> |
| IHC       |         | <b>N*</b> |
| NCI60     |         | <b>NT</b> |

N – Negative, NT – Not Tested, \* Data not shown

† Data shown are from Phospho-specificity Experiment.

# Endogenous Wes

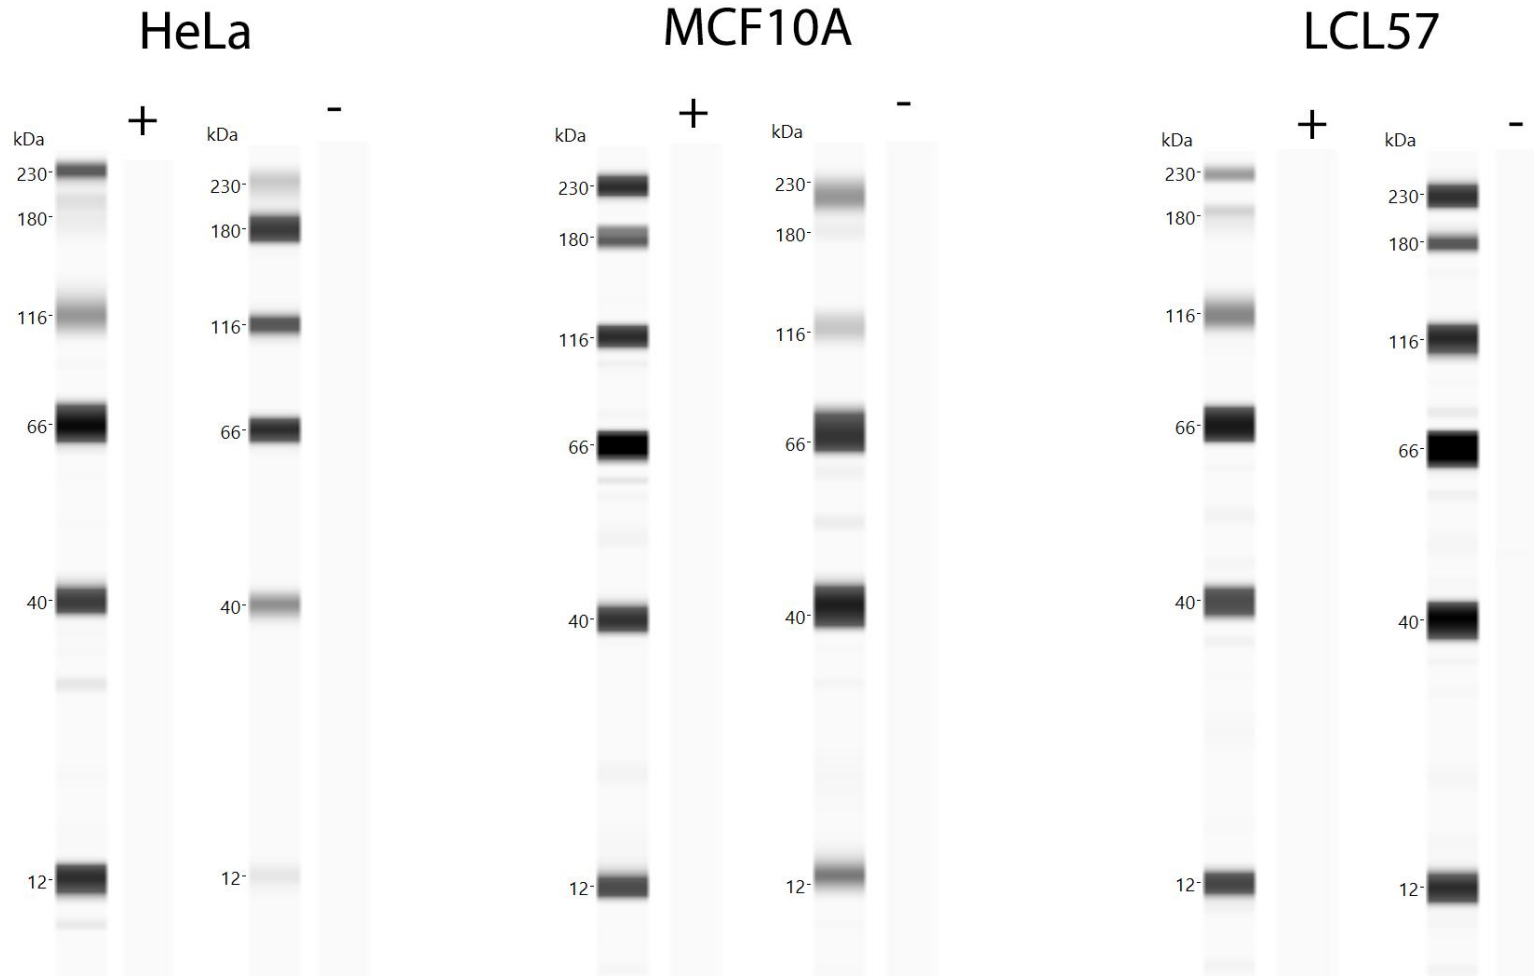

Expected molecular weight: 93 kDa

+ : irradiation treated cells  
- : not treated cells

## 21. CPTC-MDM2-1

| Technique | Analyte | Result |
|-----------|---------|--------|
| WB        | RecProt | P      |
| Wes       | HeLa    | U      |
|           | MCF10A  | U      |
|           | LCL57   | U      |
| WB        | HeLa    | P      |
|           | MCF10A  | P      |
|           | LCL57   | P      |
| IF        | HeLa    | P      |
|           | MCF10A  | P      |
|           | LCL57   | P      |
| SCWB      | HeLa    | P      |
|           | MCF10A  | P      |
|           | LCL57   | P      |
| IP        | RecProt | NT     |
| IP        | HeLa    | N      |
|           | MCF10A  | N      |
|           | LCL57   | N      |
| IHC       |         | N*     |
| NCI60     |         | NT     |

N – Negative, NT – Not tested, \* Data not shown, U - Undetermined



## WB against commercial recombinant protein

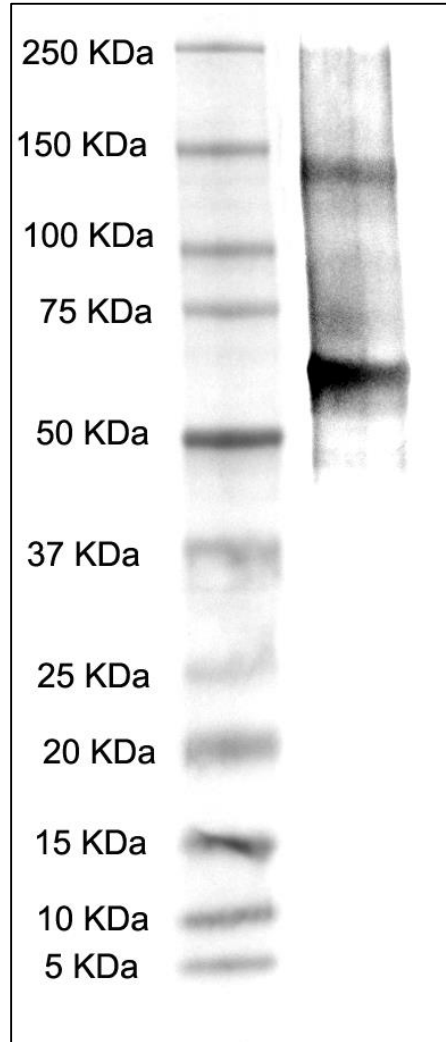

Ag Vendor: Origene

Cat #: TP761916

Description: Purified recombinant protein of Human Mdm2 p53 binding protein homolog (mouse) (MDM2), transcript variant MDM2, Gln119-Leu438, with N-terminal HIS tag, expressed in E. coli

Predicted MW: 35.9 kDa

## Endogenous WB

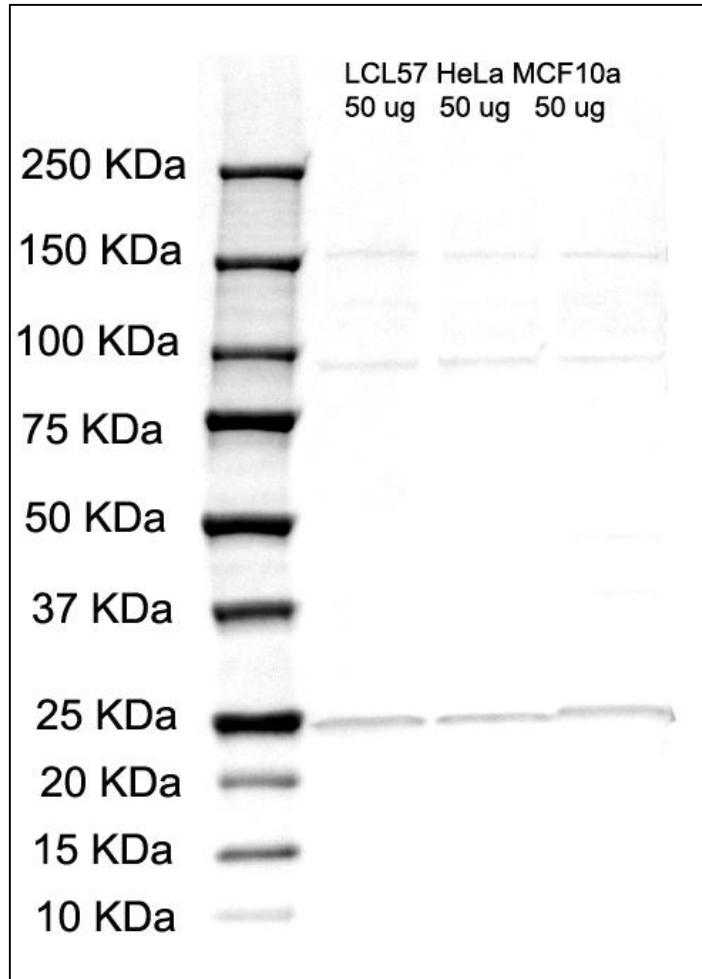

## Endogenous Wes

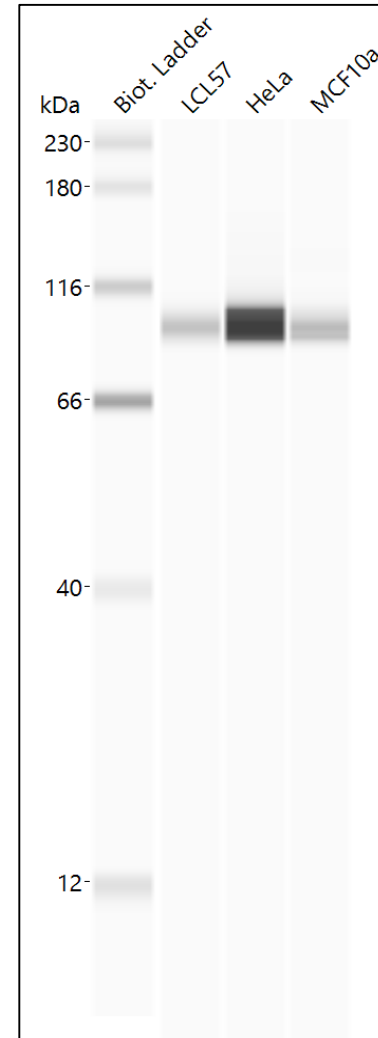

# Immunofluorescence - HeLa

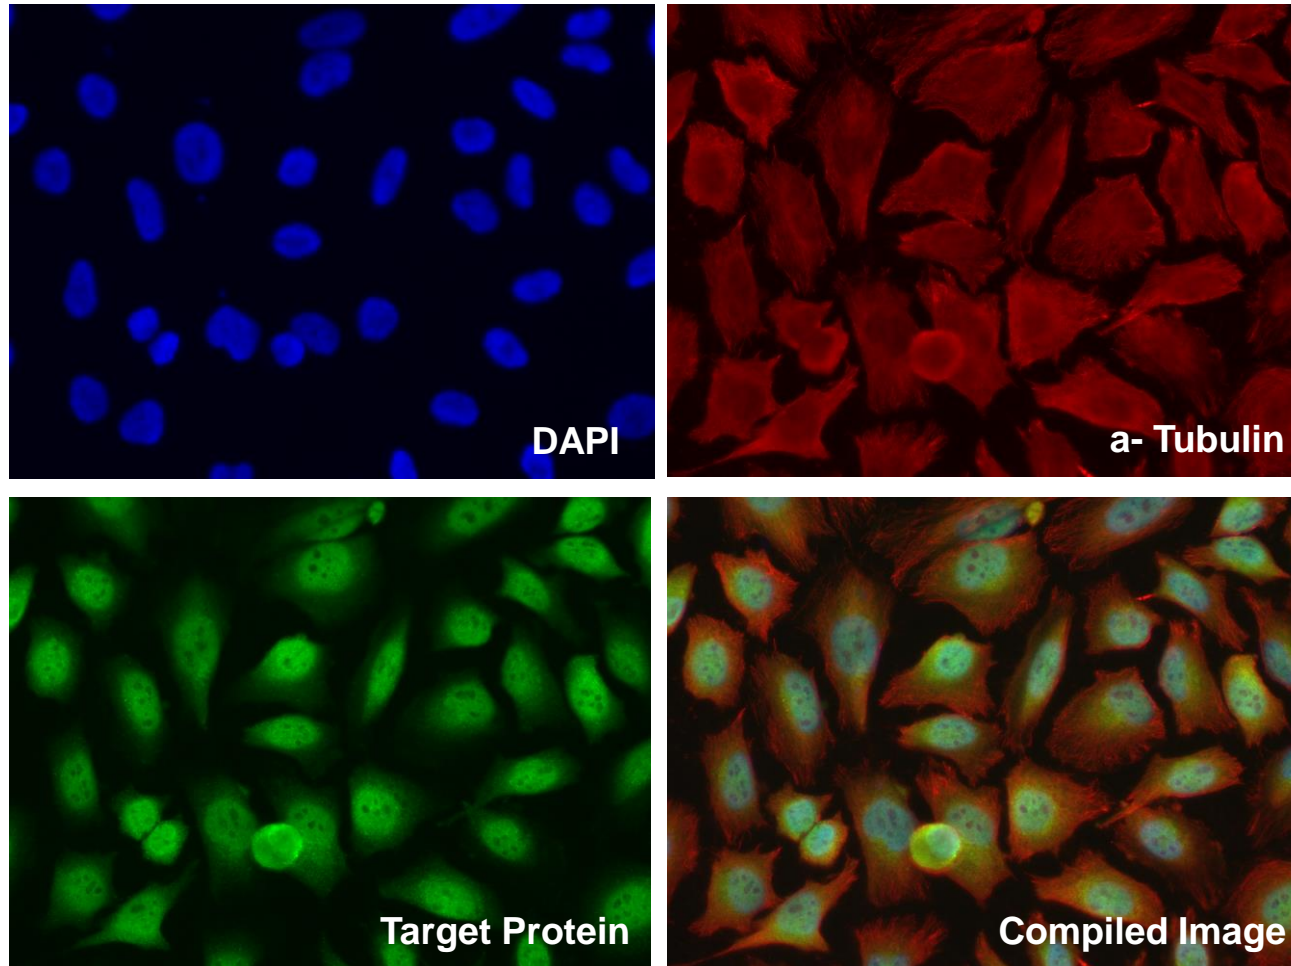

Subcellular Location: Nucleus, Other

# Immunofluorescence - MCF10A

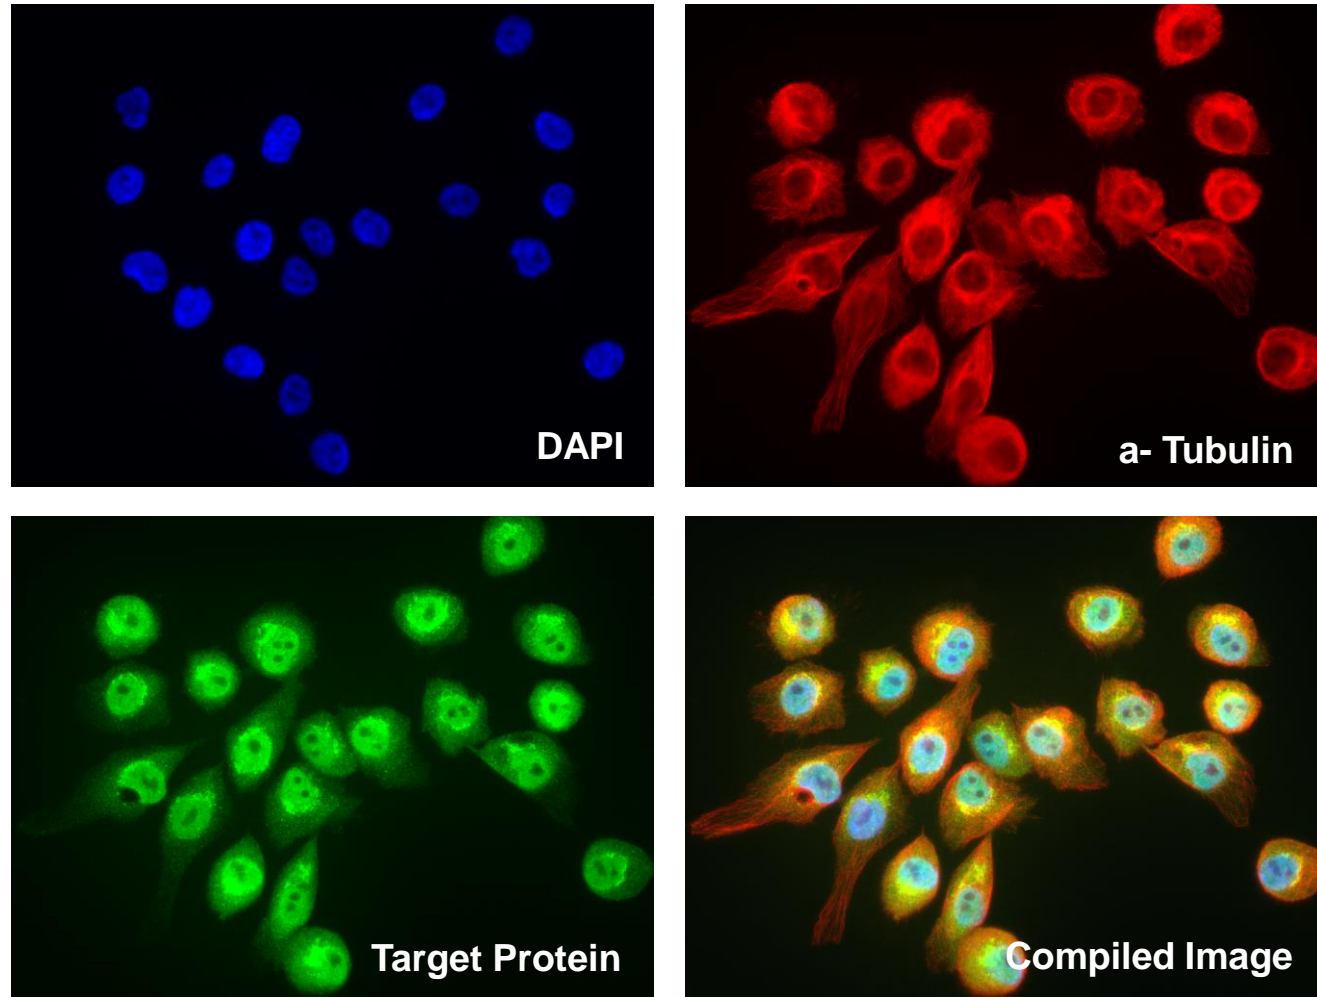

Subcellular Location: Nucleus, Other

# Immunofluorescence - LCL57

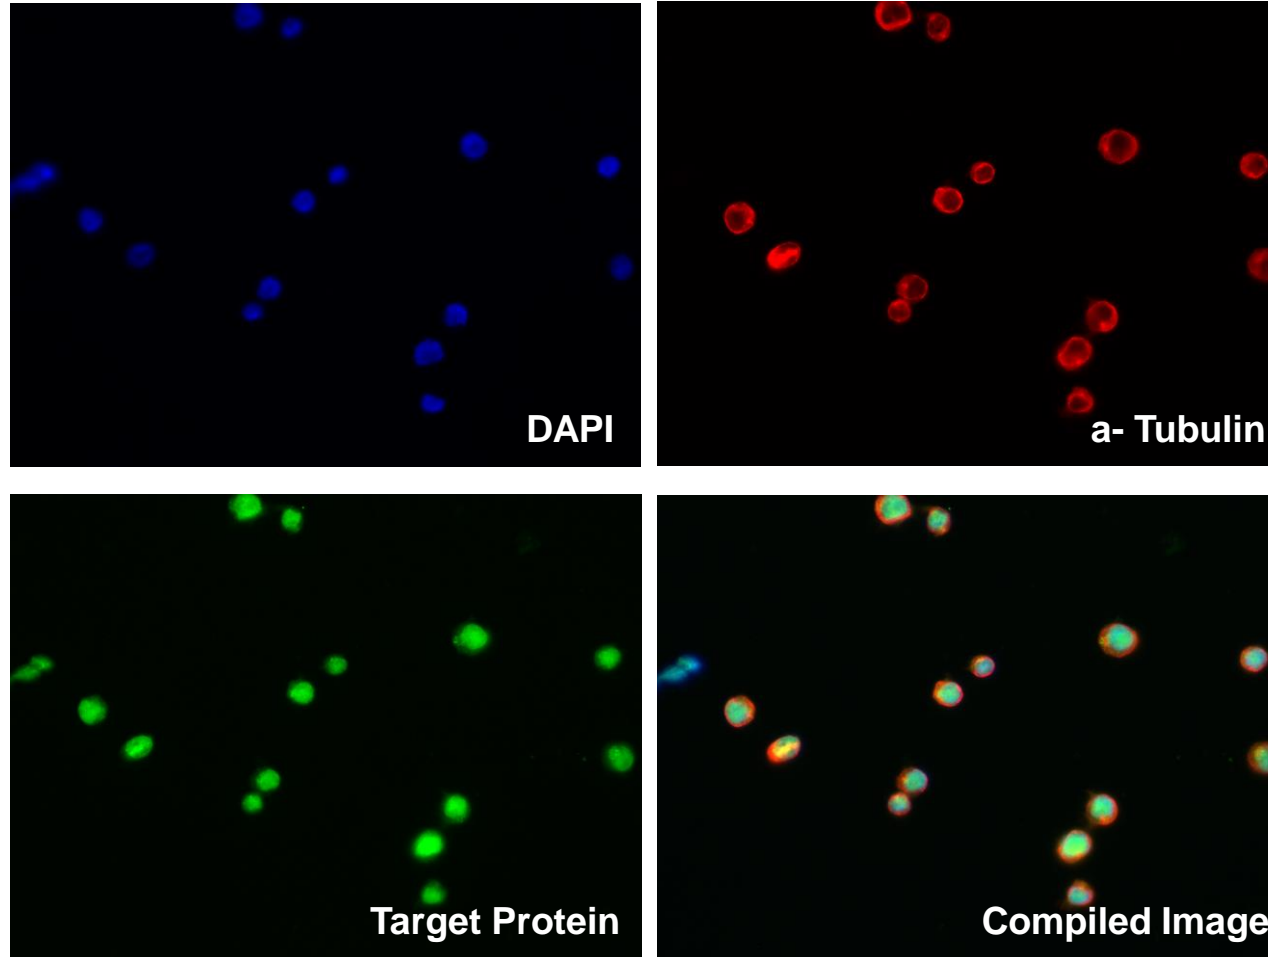

Subcellular Location: Nucleus, Other

# Single Cell Western Blot

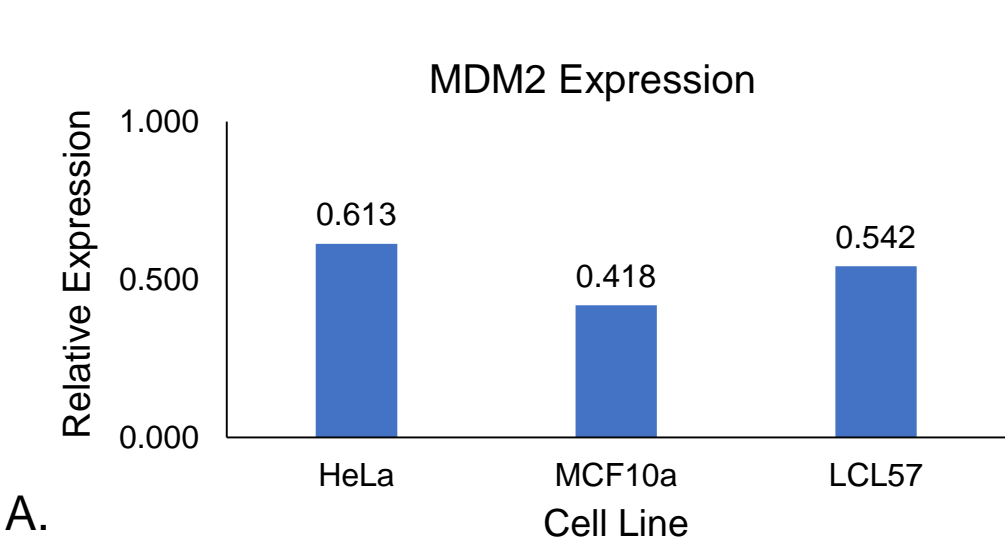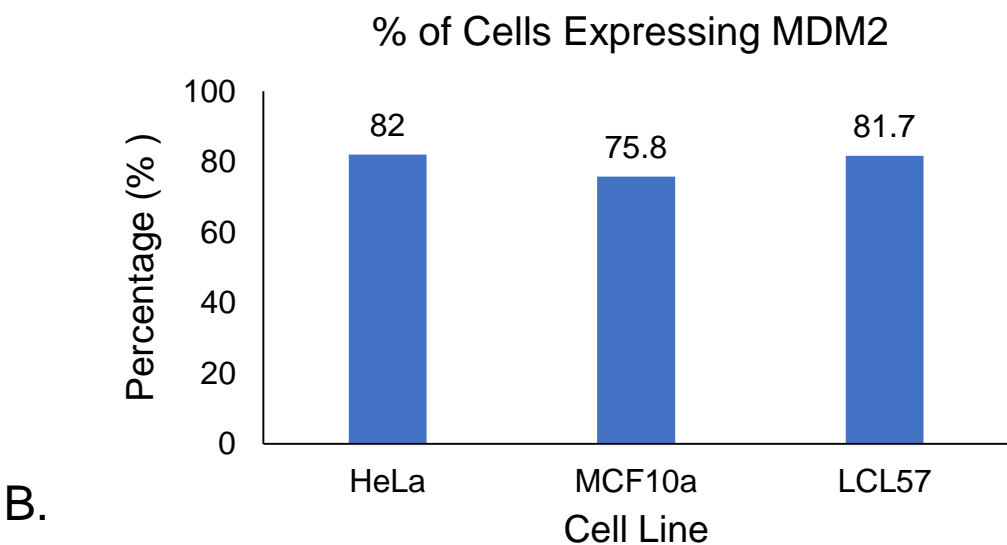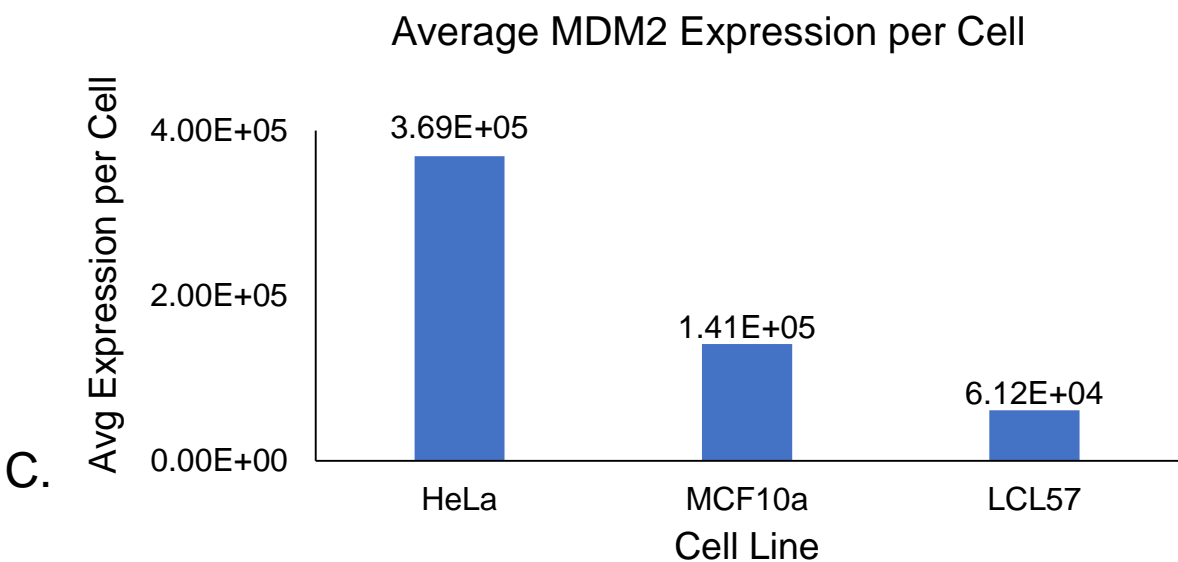

Single cell western blot data for MDM2 (66 kDa band). Relative expression of total MDM2 (66 kDa) in HeLa, MCF10A, and LCL57 cells (A). Percentage of cells that express MDM2 (B). Average expression of MDM2 protein per cell (C). All data is normalized to  $\beta$ -tubulin expression.

22. CPTC-MKI67-3

| Technique | Analyte | Result |
|-----------|---------|--------|
| WB        | RecProt | N*     |
| West†     | HeLa    | U      |
|           | MCF10A  | U      |
|           | LCL57   | N      |
| WB§       | HeLa    | N      |
|           | MCF10A  | N      |
|           | LCL57   | N      |
| IF        | HeLa    | NT     |
|           | MCF10A  | NT     |
|           | LCL57   | NT     |
| SCWB      | HeLa    | NT     |
|           | MCF10A  | NT     |
|           | LCL57   | NT     |
| IP        | RecProt | NT     |
| IP        | HeLa    | NT     |
|           | MCF10A  | NT     |
|           | LCL57   | NT     |
| IHC       |         | P      |
| NCI60     |         | P      |

P – Positive, N – Negative, NT – Not Tested, \* Data not shown, U - Uncertain  
† Data shown are from Phospho-specificity Experiment. § Data from Phospho-specificity Experiment are not shown.

# Endogenous Wes

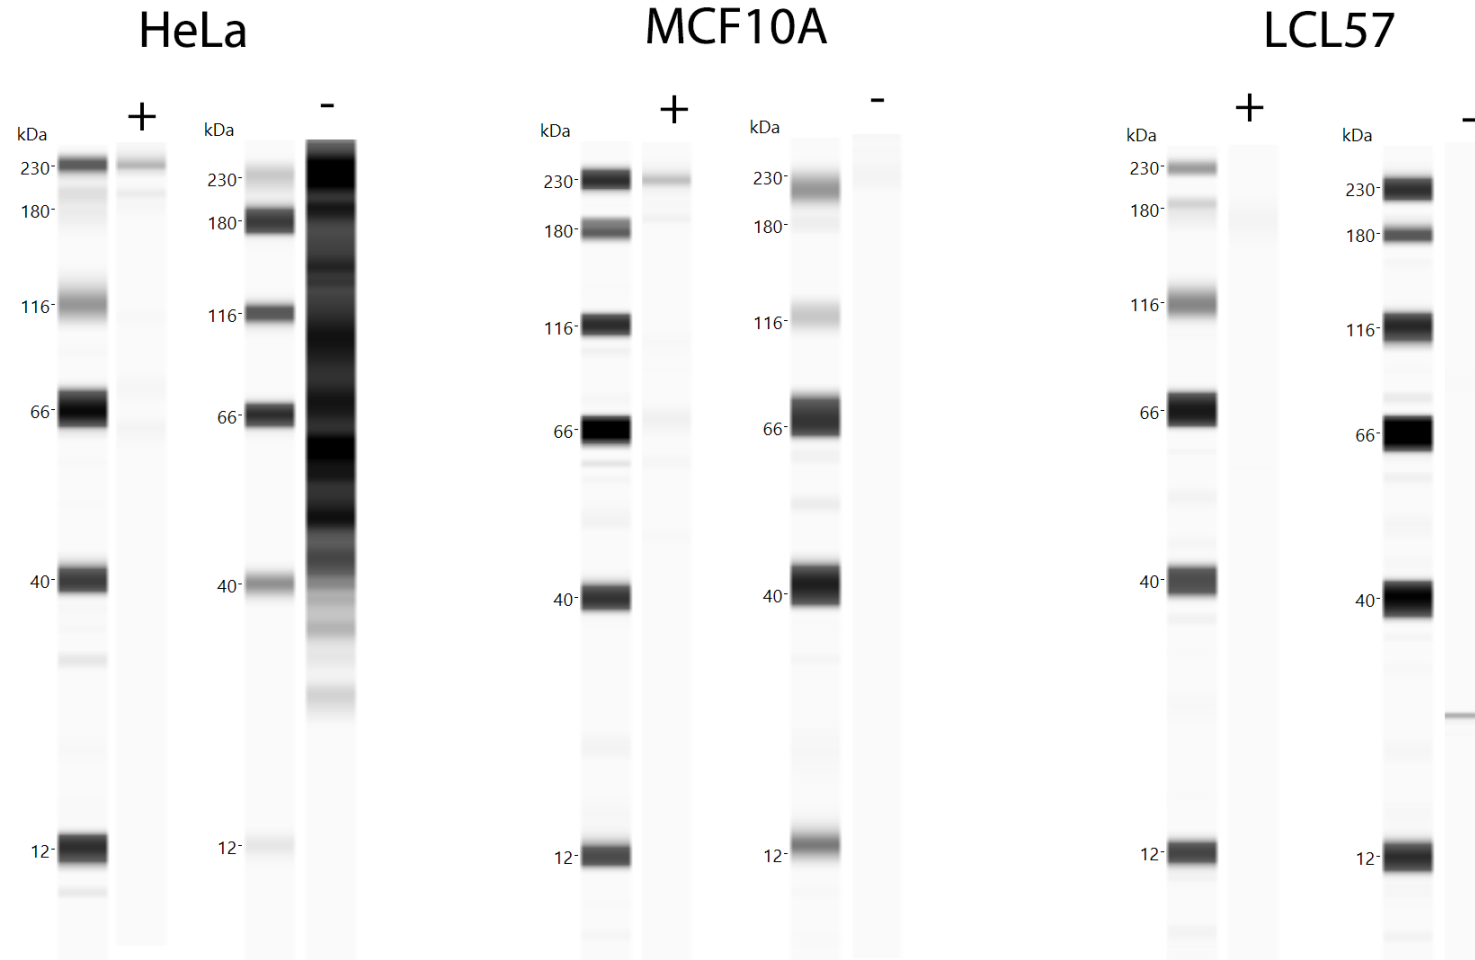

Expected molecular weight: 359, 319 kDa

+ : irradiation treated cells  
- : not treated cells



# CPTC-MKi67-3

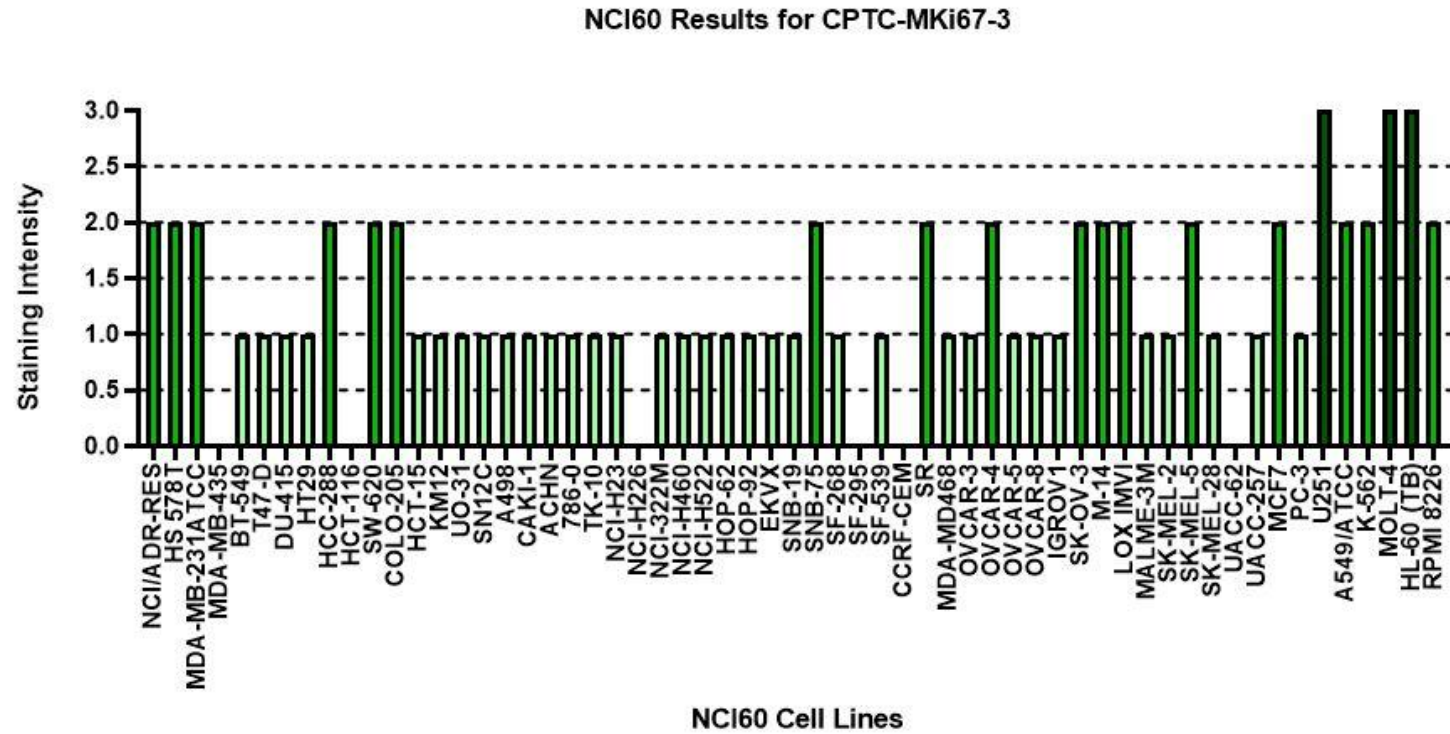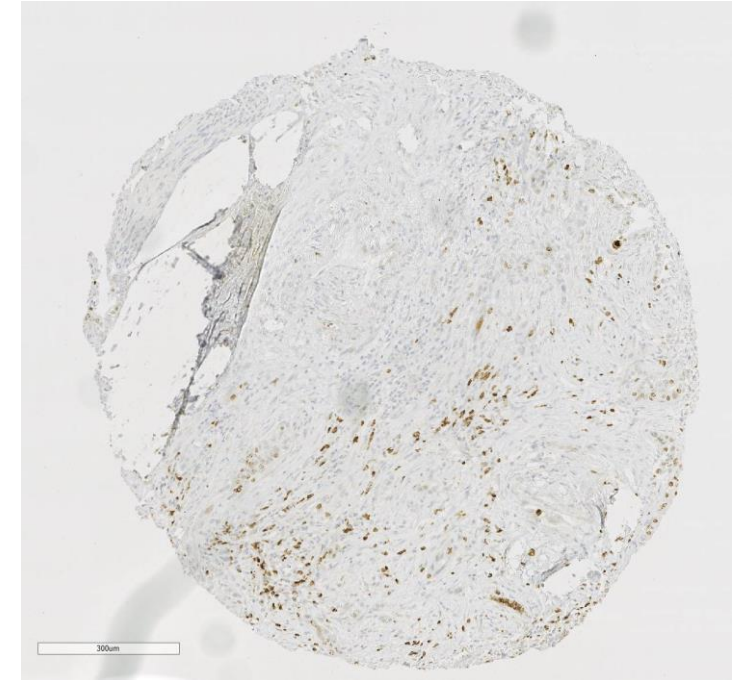

23. CPTC-MKI67-4

| Technique | Analyte | Result |
|-----------|---------|--------|
| WB        | RecProt | N*     |
| West†     | HeLa    | N      |
|           | MCF10A  | N      |
|           | LCL57   | N      |
| WB        | HeLa    | NT     |
|           | MCF10A  | NT     |
|           | LCL57   | NT     |
| IF        | HeLa    | NT     |
|           | MCF10A  | NT     |
|           | LCL57   | NT     |
| SCWB      | HeLa    | NT     |
|           | MCF10A  | NT     |
|           | LCL57   | NT     |
| IP        | RecProt | NT     |
| IP        | HeLa    | NT     |
|           | MCF10A  | NT     |
|           | LCL57   | NT     |
| IHC       |         | P      |
| NCI60     |         | P      |

N – Negative, NT – Not Tested, \* Data not shown  
† Data shown are from Phospho-specificity Experiment.

# Endogenous Wes

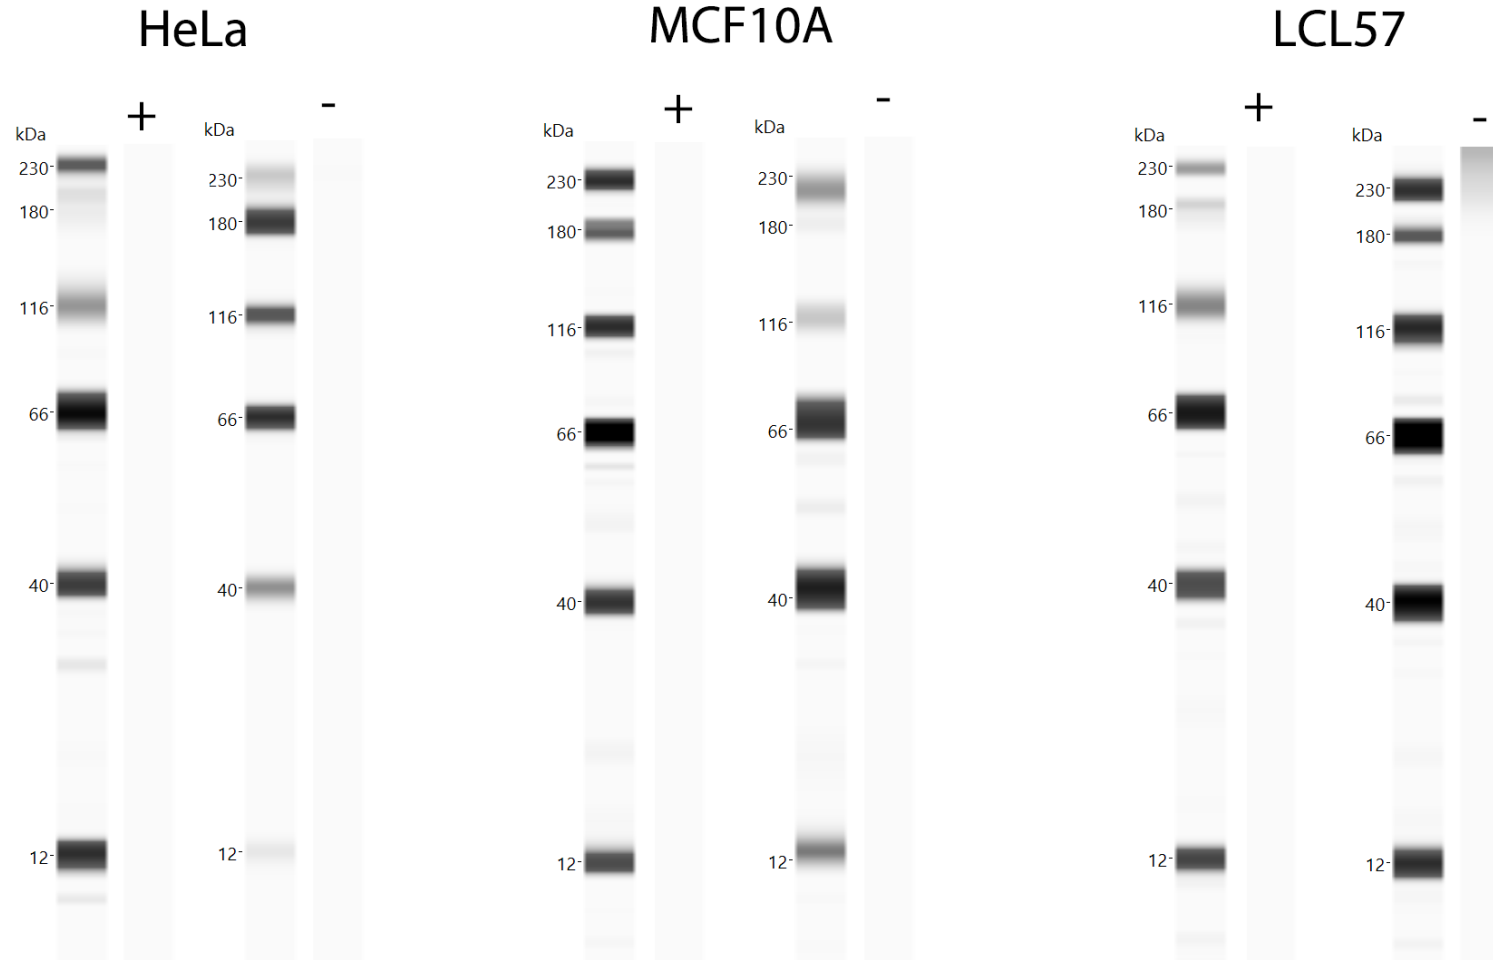

Expected molecular weight: 359, 319 kDa

+ : irradiation treated cells  
- : not treated cells

CPTC-MKi67-4

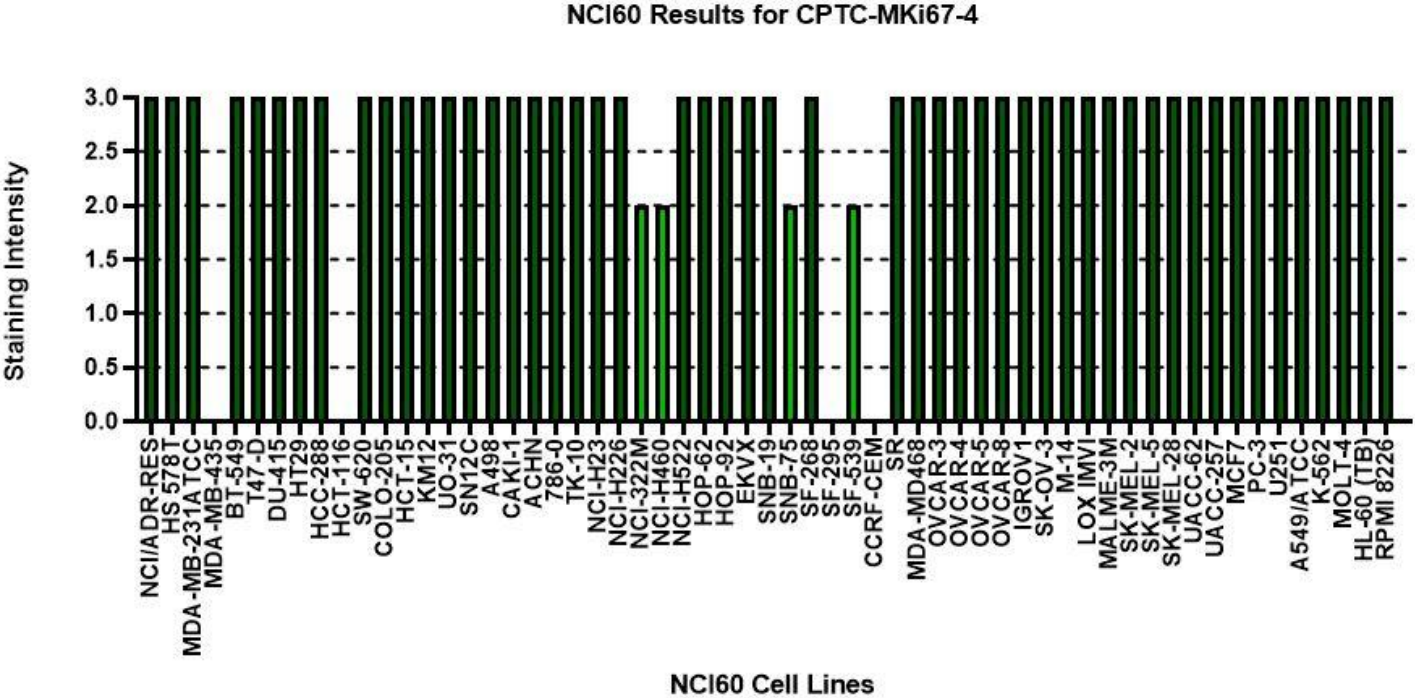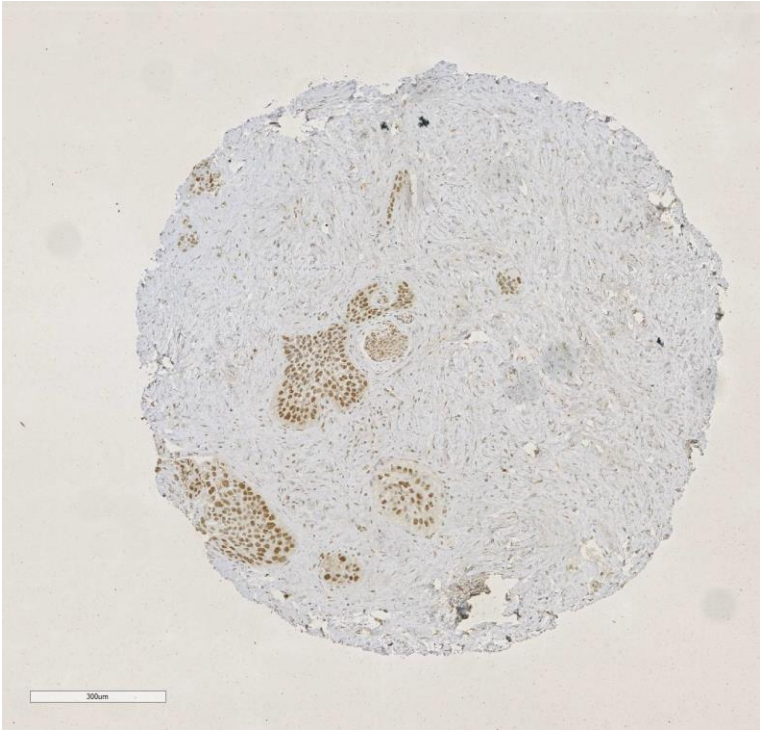

## 24. CPTC-MRE11A-1

| Technique | Analyte | Result    |
|-----------|---------|-----------|
| WB        | RecProt | <b>N*</b> |
| West†     | HeLa    | <b>N</b>  |
|           | MCF10A  | <b>N</b>  |
|           | LCL57   | <b>N</b>  |
| WB        | HeLa    | <b>NT</b> |
|           | MCF10A  | <b>NT</b> |
|           | LCL57   | <b>NT</b> |
| IF        | HeLa    | <b>NT</b> |
|           | MCF10A  | <b>NT</b> |
|           | LCL57   | <b>NT</b> |
| SCWB      | HeLa    | <b>NT</b> |
|           | MCF10A  | <b>NT</b> |
|           | LCL57   | <b>NT</b> |
| IP        | RecProt | <b>NT</b> |
| IP        | HeLa    | <b>NT</b> |
|           | MCF10A  | <b>NT</b> |
|           | LCL57   | <b>NT</b> |
| IHC       |         | <b>P</b>  |
| NCI60     |         | <b>P</b>  |

N – Negative, NT – Not Tested, \* Data not shown

† Data shown are from Phospho-specificity Experiment.

# Endogenous Wes

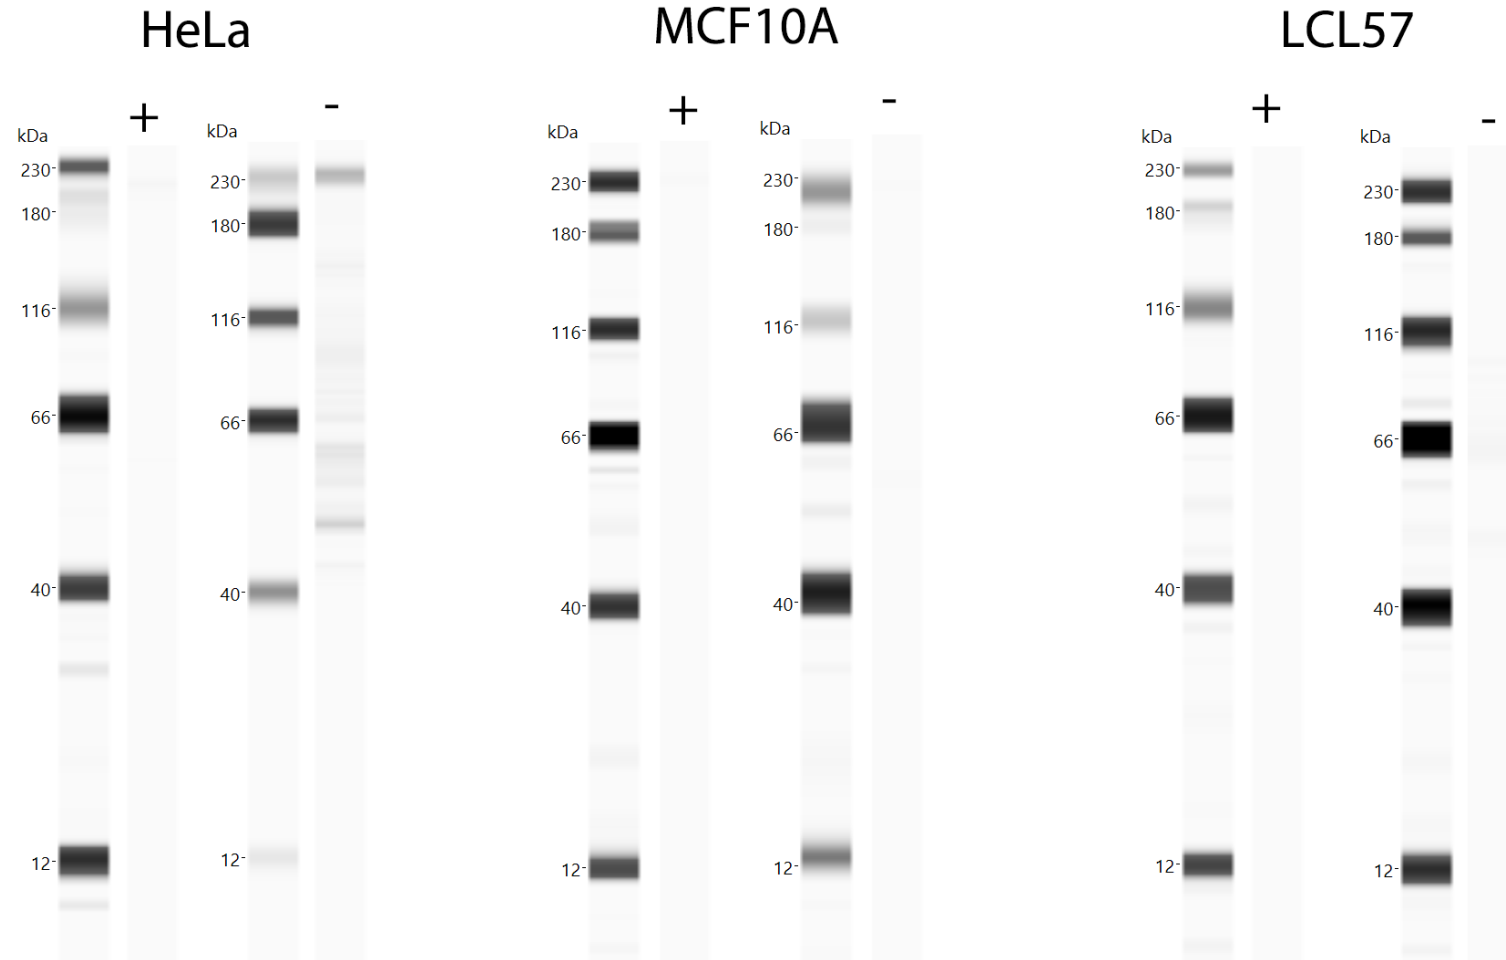

Expected molecular weight: 81, 78 kDa

+ : irradiation treated cells  
- : not treated cells

# CPTC-MRE11A-1

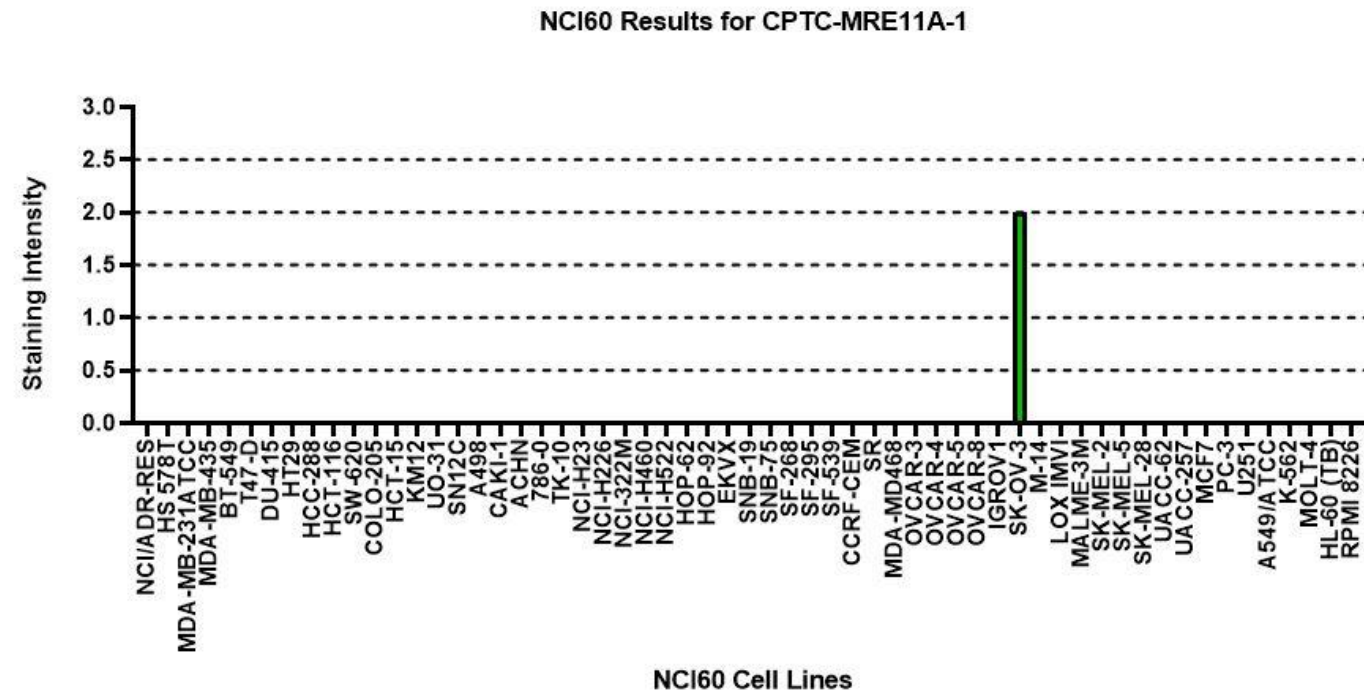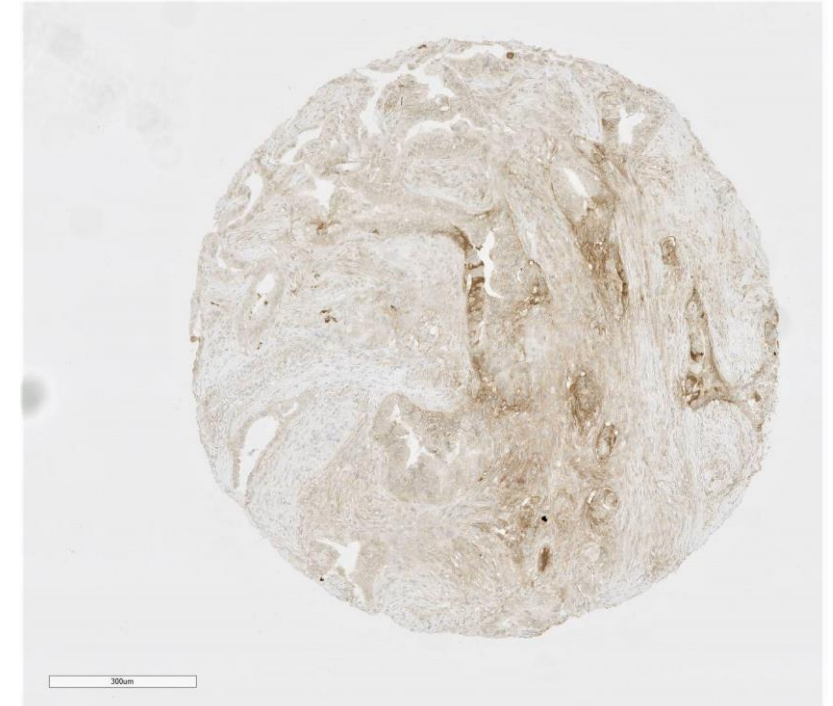

## 25. CPTC-NCAPH2-1

| Technique | Analyte | Result    |
|-----------|---------|-----------|
| WB        | RecProt | <b>N*</b> |
| West†     | HeLa    | <b>N</b>  |
|           | MCF10A  | <b>N</b>  |
|           | LCL57   | <b>N</b>  |
| WB        | HeLa    | <b>NT</b> |
|           | MCF10A  | <b>NT</b> |
|           | LCL57   | <b>NT</b> |
| IF        | HeLa    | <b>NT</b> |
|           | MCF10A  | <b>NT</b> |
|           | LCL57   | <b>NT</b> |
| SCWB      | HeLa    | <b>NT</b> |
|           | MCF10A  | <b>NT</b> |
|           | LCL57   | <b>NT</b> |
| IP        | RecProt | <b>NT</b> |
| IP        | HeLa    | <b>NT</b> |
|           | MCF10A  | <b>NT</b> |
|           | LCL57   | <b>NT</b> |
| IHC       |         | <b>P</b>  |
| NCI60     |         | <b>P</b>  |

N – Negative, NT – Not Tested, \* Data not shown

† Data shown are from Phospho-specificity Experiment.



# Endogenous Wes

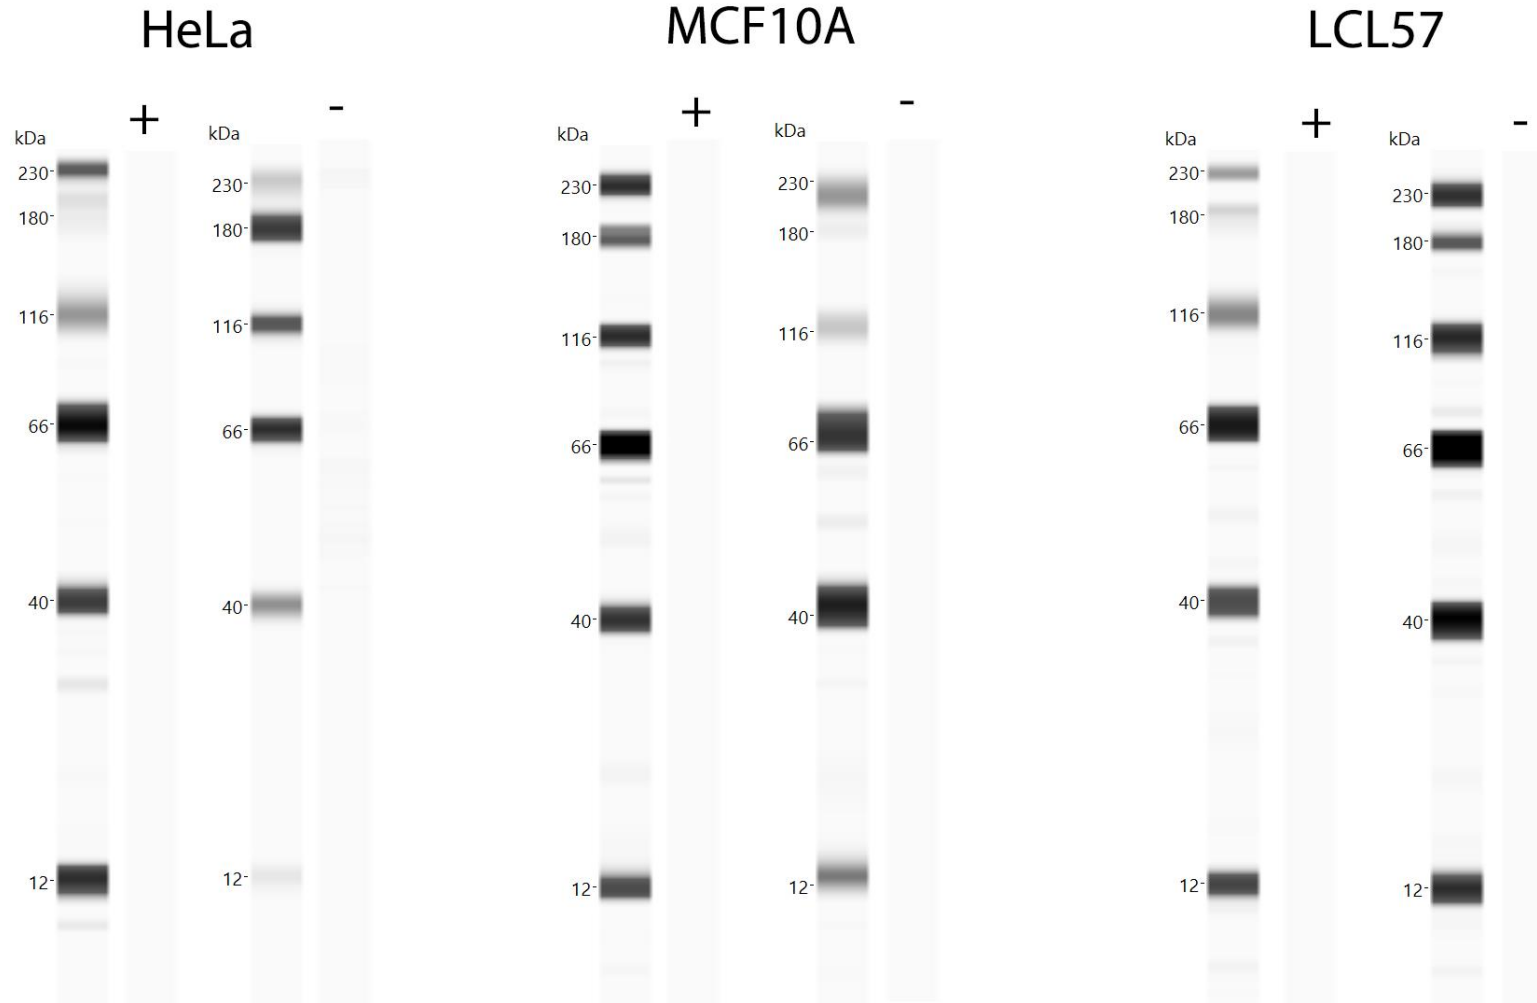

# CPTC-NCAPH2-1

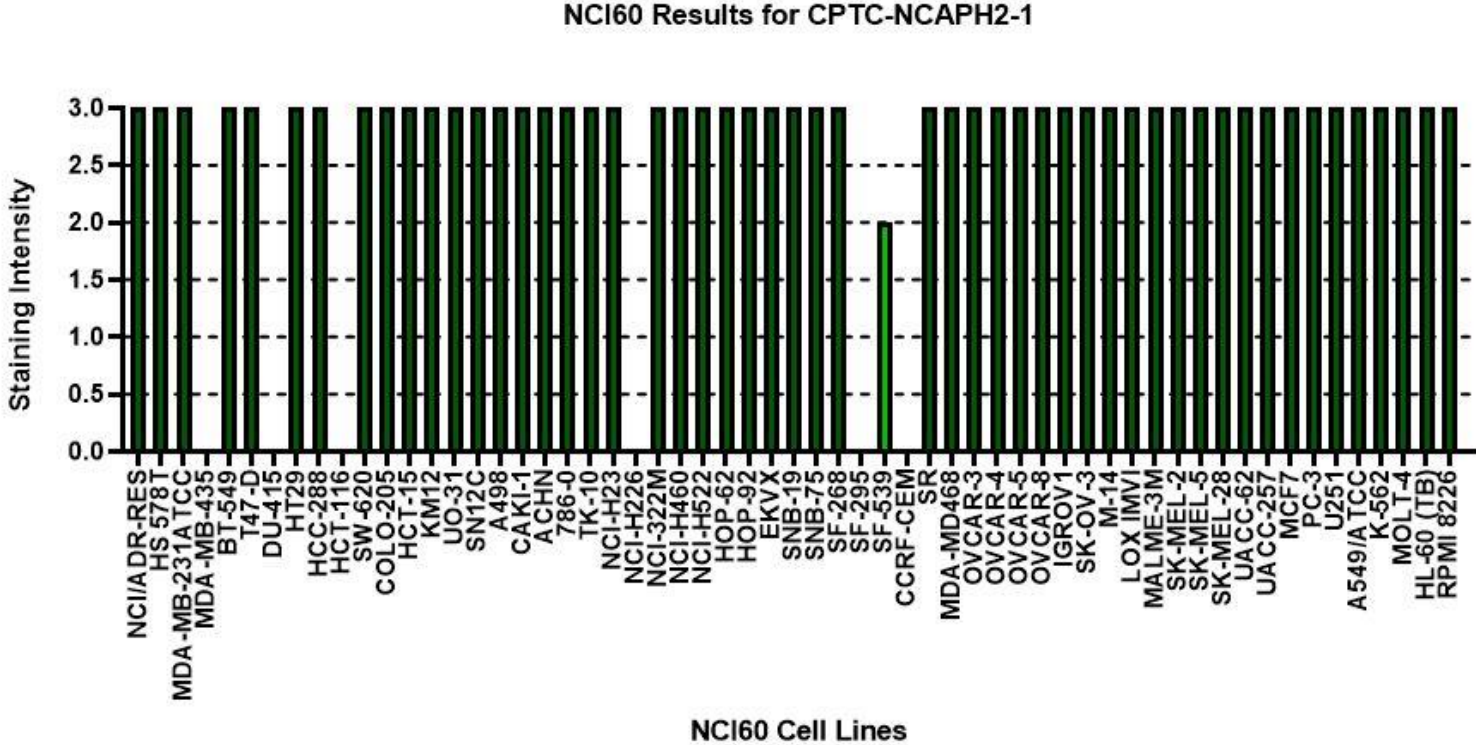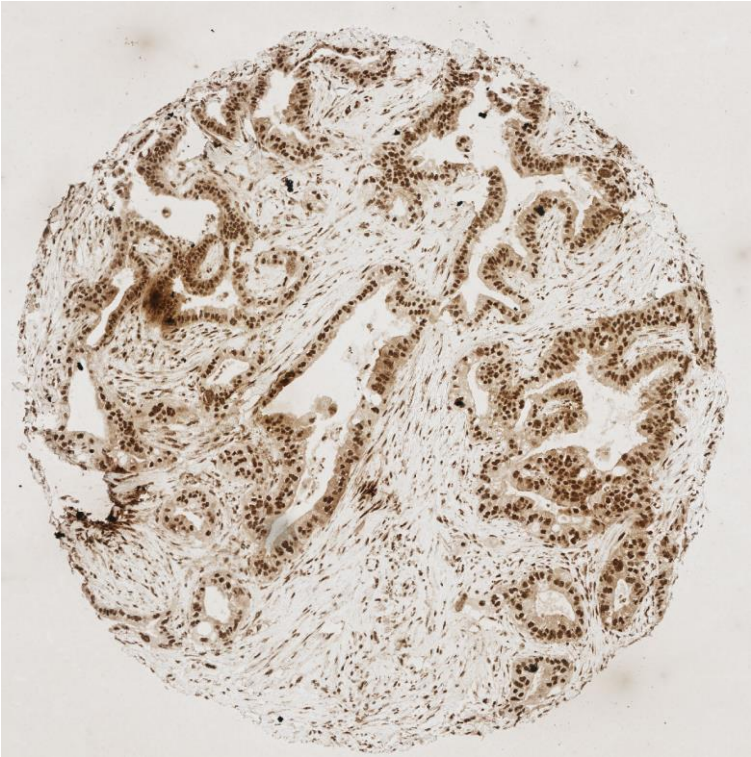

26. CPTC-NUMA1-1

| Technique | Analyte | Result |
|-----------|---------|--------|
| WB        | RecProt | N*     |
| West†     | HeLa    | P      |
|           | MCF10A  | P      |
|           | LCL57   | P      |
| WB§       | HeLa    | U*     |
|           | MCF10A  | U*     |
|           | LCL57   | P      |
| IF        | HeLa    | NT     |
|           | MCF10A  | NT     |
|           | LCL57   | NT     |
| SCWB      | HeLa    | NT     |
|           | MCF10A  | NT     |
|           | LCL57   | NT     |
| IP        | RecProt | NT     |
| IP        | HeLa    | NT     |
|           | MCF10A  | NT     |
|           | LCL57   | NT     |
| IHC       |         | P      |
| NCI60     |         | P      |

P – Positive, N – Negative, NT – Not Tested, \* Data not shown, U - Uncertain  
† Data shown are from Phospho-specificity Experiment. § Data shown are from Phospho-specificity Experiment.

# Endogenous Wes

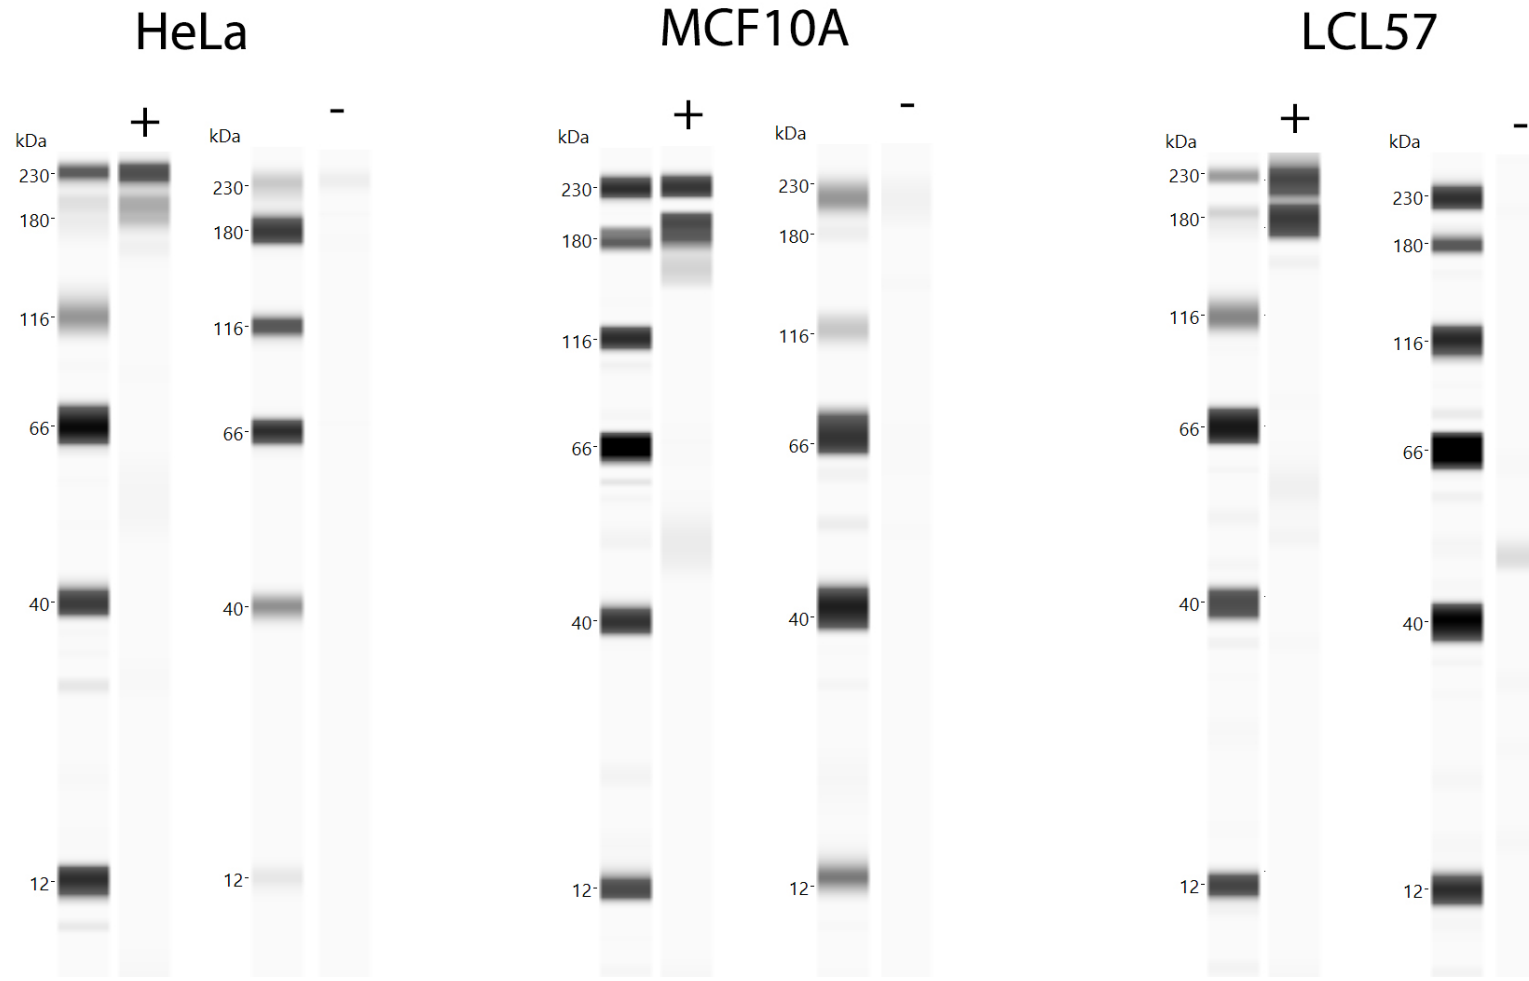

Expected molecular weight: 238, 237, 201, 200, 109 kDa

+ : irradiation treated cells  
- : not treated cells

# CPTC-NUMA1-1

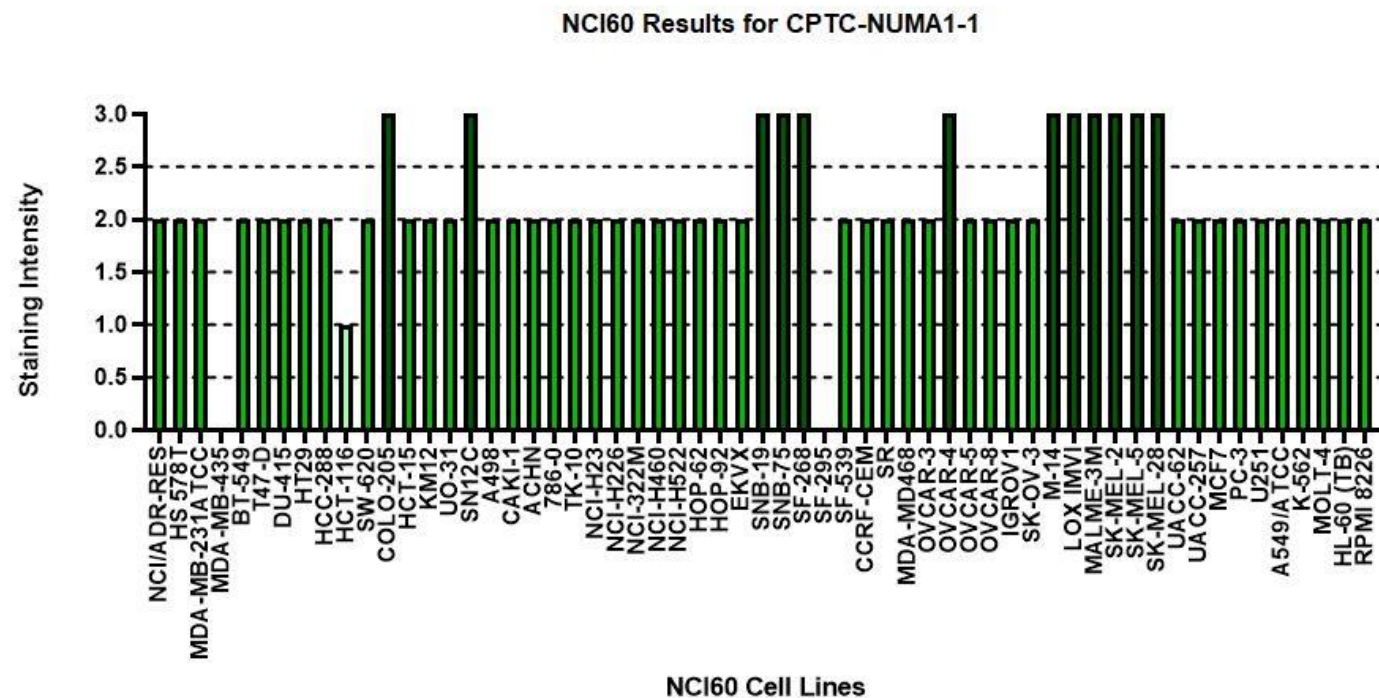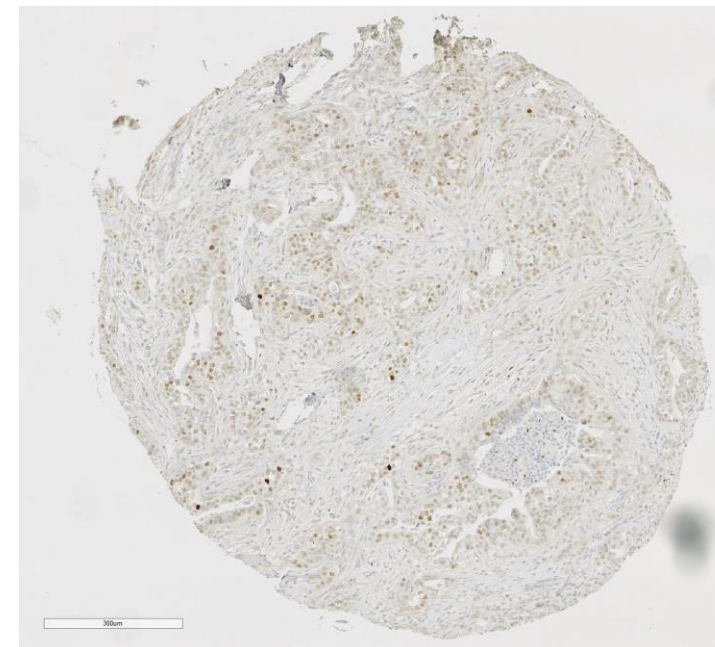

# Traditional Western Blot

**CPTC-NUMA1-1**  
**EB0906-2E12-H3/K5**

**+**    **-**

Expected molecular weight:  
238, 237, 201, 200, 109 kDa  
+ : Irradiation treated cells  
- : Non-treated cells

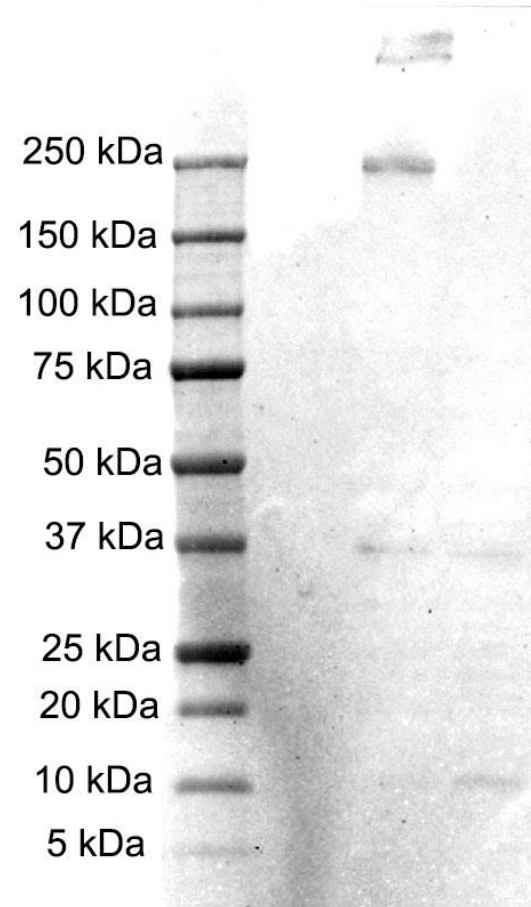

## 27. CPTC-PAK4-1

| Technique | Analyte | Result |
|-----------|---------|--------|
| WB        | RecProt | P      |
| Wes       | HeLa    | P      |
|           | MCF10A  | P      |
|           | LCL57   | P      |
| WB        | HeLa    | N      |
|           | MCF10A  | N      |
|           | LCL57   | N      |
| IF        | HeLa    | N      |
|           | MCF10A  | N      |
|           | LCL57   | P      |
| SCWB†     | HeLa    | N      |
|           | MCF10A  | N      |
|           | LCL57   | N      |
| IP*       | RecProt | P      |
| IP*       | HeLa    | N      |
|           | MCF10A  | N      |
|           | LCL57   | N      |
| IHC       |         | P      |
| NCI60     |         | P      |

P – Positive, N – Negative, \* Please refer to tables for results, † Data not shown

## WB against commercial recombinant protein

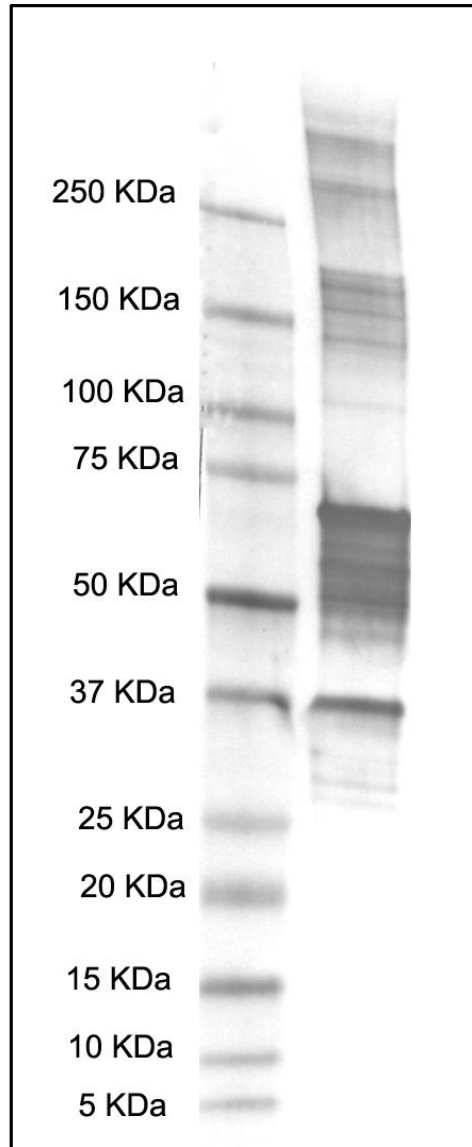

Ag Vendor: Origene

Cat #: TP302302

Description: Recombinant protein of human p21 protein (Cdc42/Rac)-activated kinase 4 (PAK4), transcript variant 1

Predicted MW 63.9 KDa



## Endogenous WB

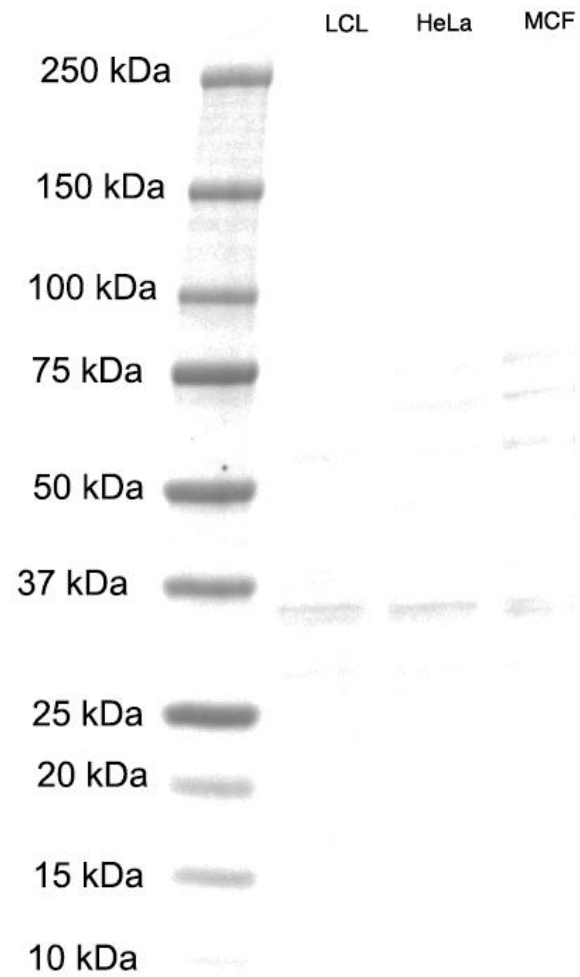

## Endogenous Wes

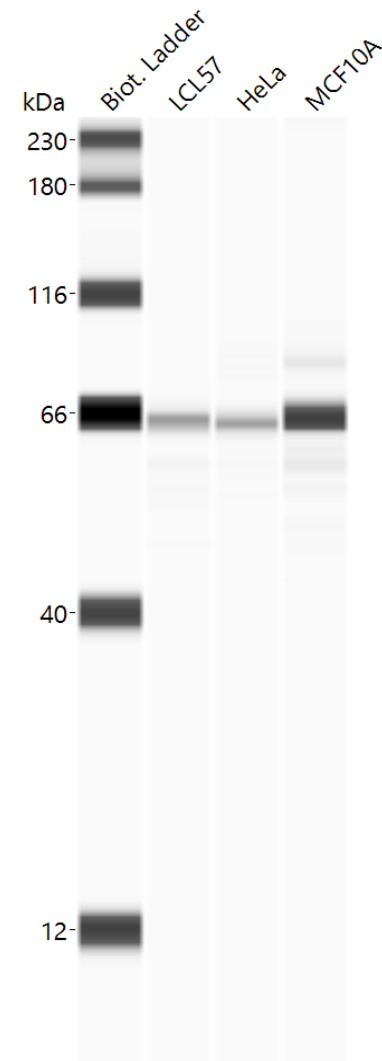

## Immunofluorescence – LCL57

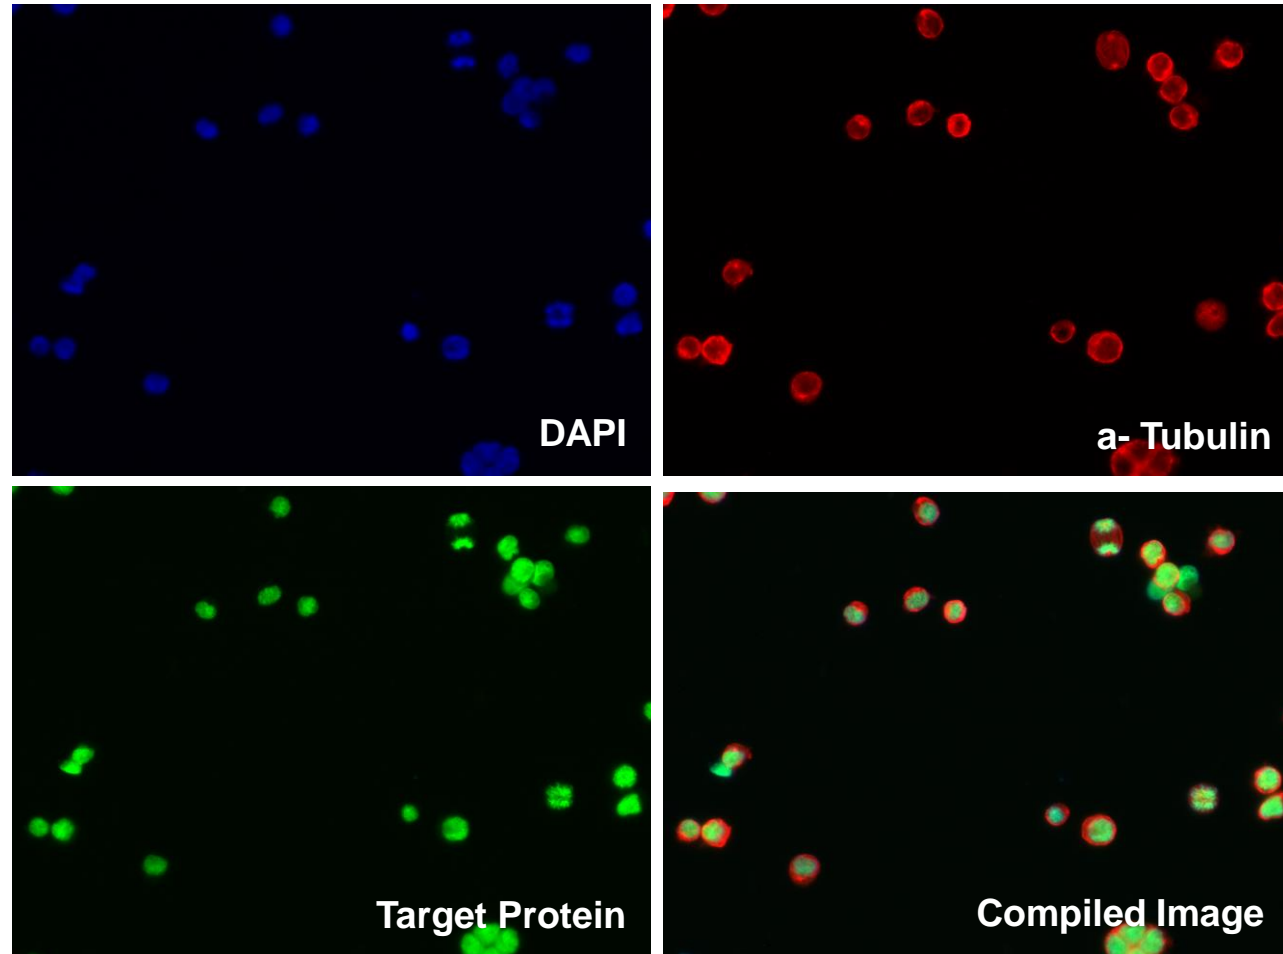

Subcellular location: Cytoplasm

# CPTC-PAK4-1

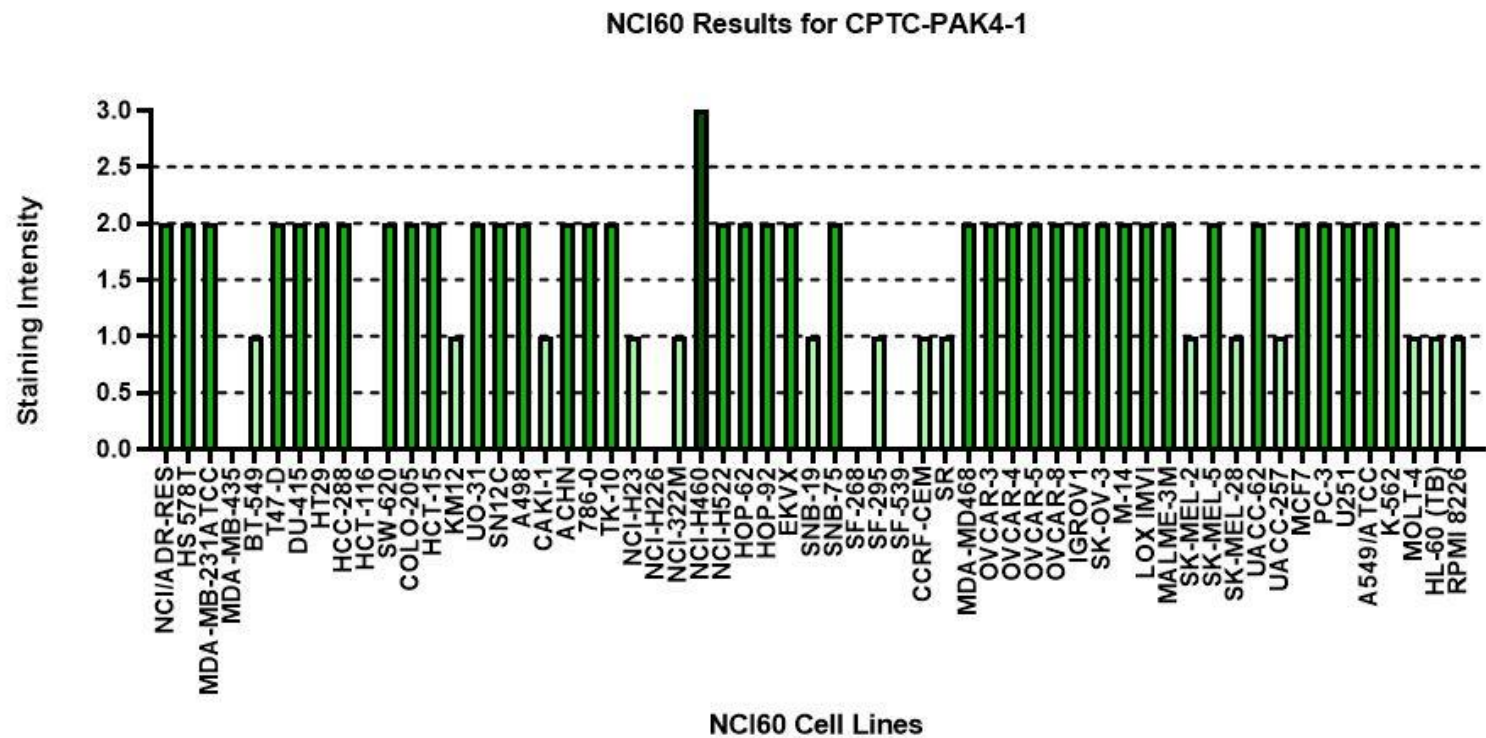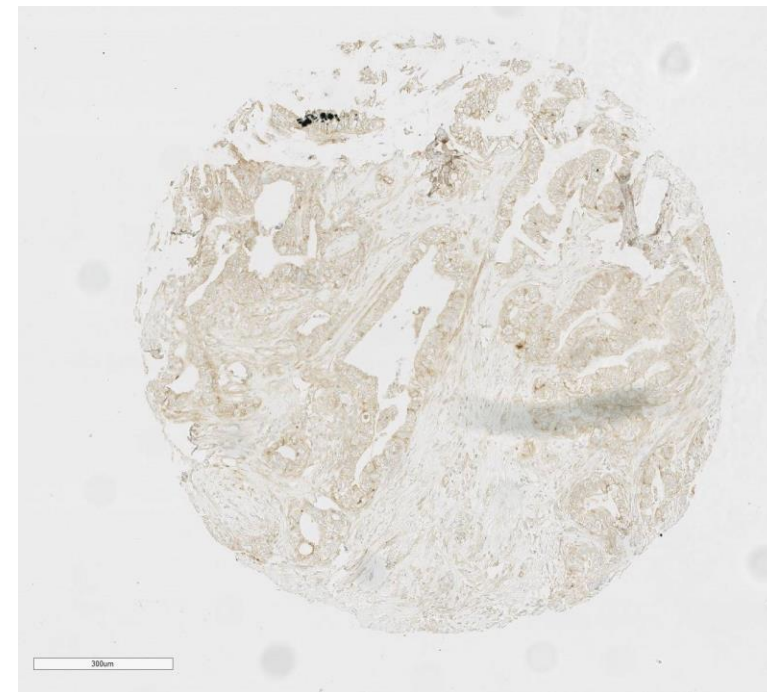

## 28. CPTC-PARP1-2

| Technique | Analyte | Result    |
|-----------|---------|-----------|
| WB        | RecProt | <b>N*</b> |
| West†     | HeLa    | <b>N</b>  |
|           | MCF10A  | <b>N</b>  |
|           | LCL57   | <b>N</b>  |
| WB        | HeLa    | <b>NT</b> |
|           | MCF10A  | <b>NT</b> |
|           | LCL57   | <b>NT</b> |
| IF        | HeLa    | <b>NT</b> |
|           | MCF10A  | <b>NT</b> |
|           | LCL57   | <b>NT</b> |
| SCWB      | HeLa    | <b>NT</b> |
|           | MCF10A  | <b>NT</b> |
|           | LCL57   | <b>NT</b> |
| IP        | RecProt | <b>NT</b> |
| IP        | HeLa    | <b>NT</b> |
|           | MCF10A  | <b>NT</b> |
|           | LCL57   | <b>NT</b> |
| IHC       |         | <b>N*</b> |
| NCI60     |         | <b>NT</b> |

N – Negative, NT – Not Tested, \* Data not shown

† Data shown are from Phospho-specificity Experiment

# Endogenous Wes

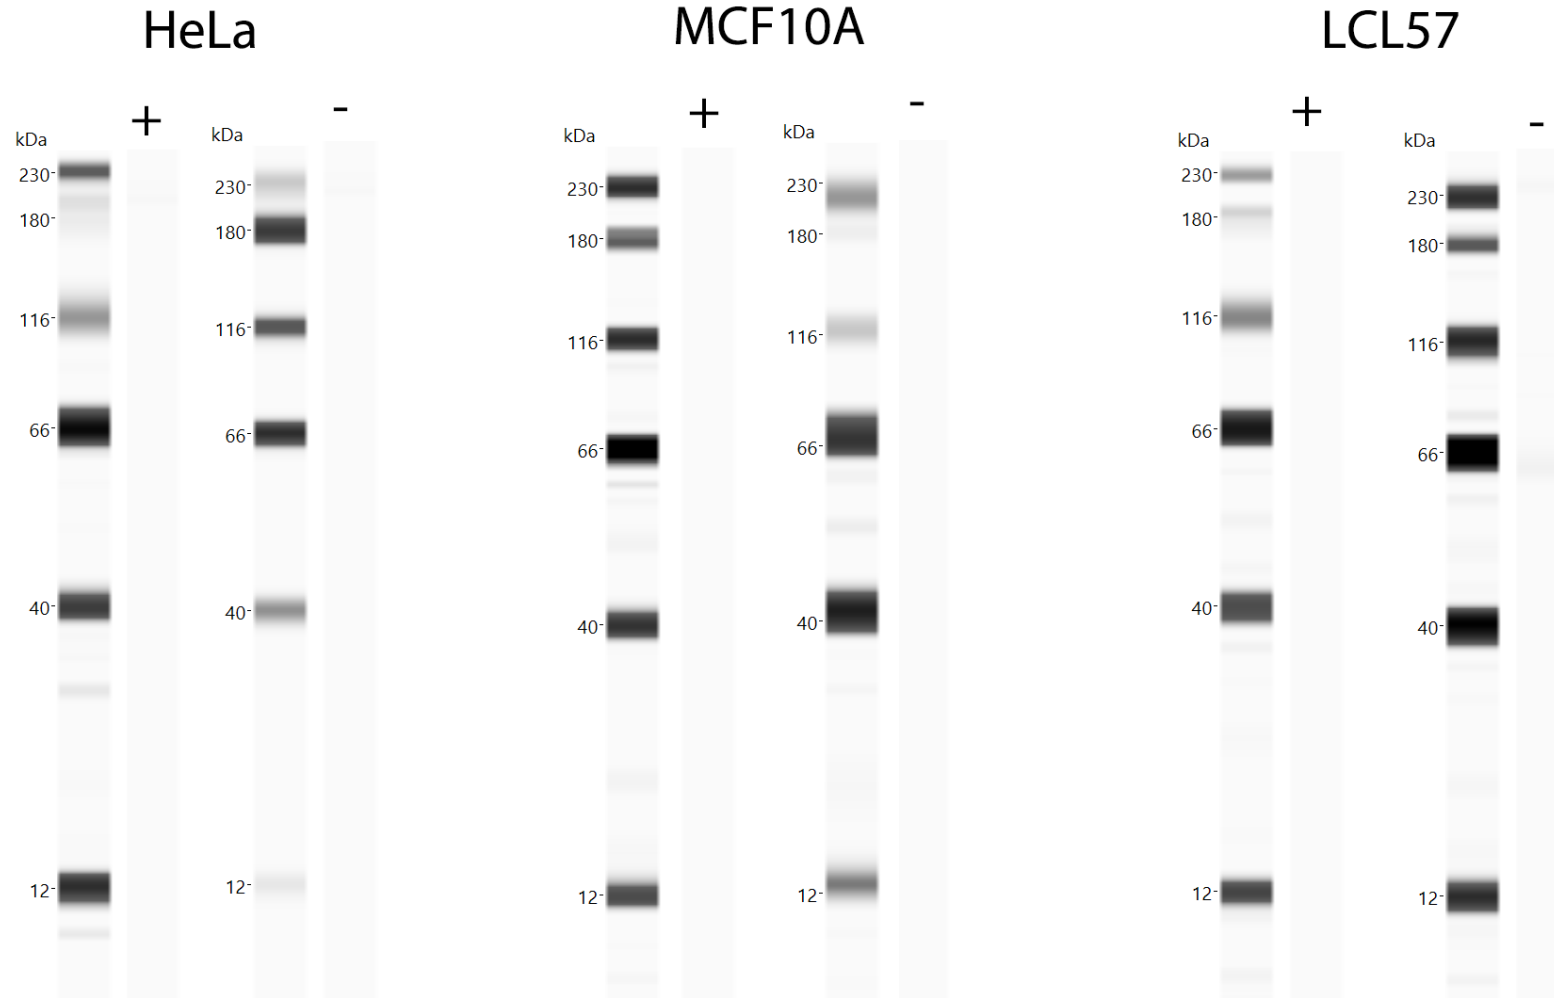

Expected molecular weight: 113 kDa

+ : irradiation treated cells  
- : not treated cells

29. CPTC-RAD50-2

| Technique | Analyte | Result |
|-----------|---------|--------|
| WB        | RecProt | N*     |
| West†     | HeLa    | N      |
|           | MCF10A  | N      |
|           | LCL57   | N      |
| WB        | HeLa    | NT     |
|           | MCF10A  | NT     |
|           | LCL57   | NT     |
| IF        | HeLa    | NT     |
|           | MCF10A  | NT     |
|           | LCL57   | NT     |
| SCWB      | HeLa    | NT     |
|           | MCF10A  | NT     |
|           | LCL57   | NT     |
| IP        | RecProt | NT     |
| IP        | HeLa    | NT     |
|           | MCF10A  | NT     |
|           | LCL57   | NT     |
| IHC       |         | N*     |
| NCI60     |         | NT     |

N – Negative, NT – Not Tested, \* Data not shown  
† Data shown are from Phospho-specificity Experiment.

# Endogenous Wes

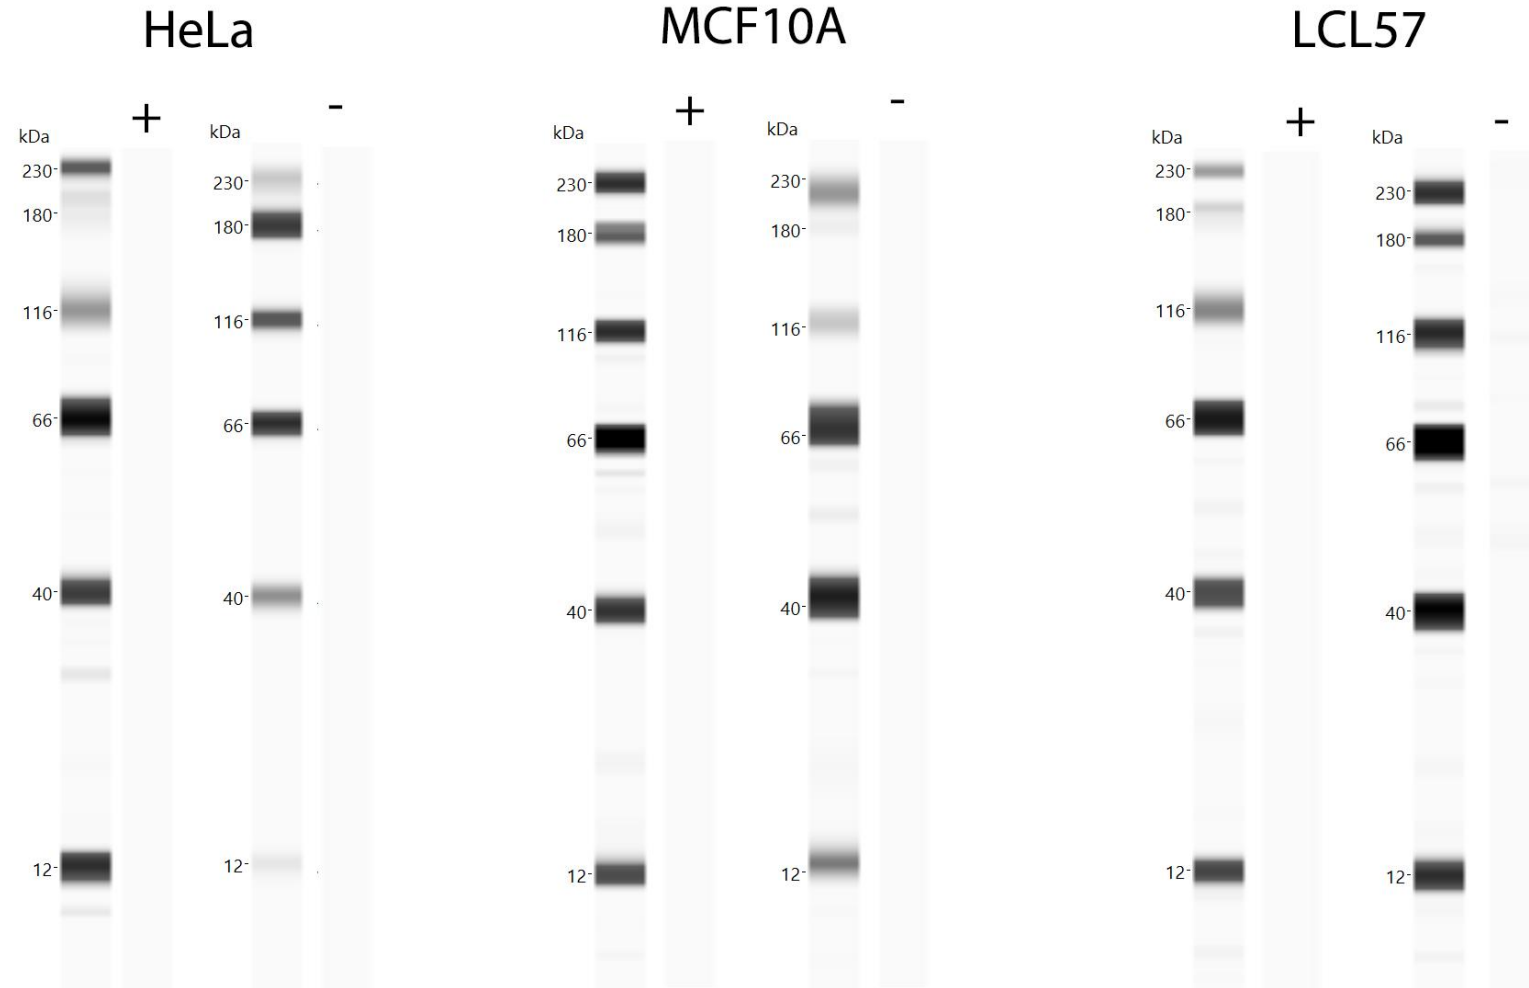

Expected molecular weight: 154, 155, 138 kDa

+ : irradiation treated cells  
- : not treated cells

30. CPTC-RAD9A-1

| Technique | Analyte | Result |
|-----------|---------|--------|
| WB        | RecProt | N*     |
| West†     | HeLa    | P      |
|           | MCF10A  | N      |
|           | LCL57   | N      |
| WB§       | HeLa    | U      |
|           | MCF10A  | N      |
|           | LCL57   | U      |
| IF        | HeLa    | NT     |
|           | MCF10A  | NT     |
|           | LCL57   | NT     |
| SCWB      | HeLa    | NT     |
|           | MCF10A  | NT     |
|           | LCL57   | NT     |
| IP        | RecProt | NT     |
| IP        | HeLa    | NT     |
|           | MCF10A  | NT     |
|           | LCL57   | NT     |
| IHC       |         | N*     |
| NCI60     |         | NT     |

P – Positive, N – Negative, NT – Not Tested, U – Undetermined, \* Data not shown

† Data shown are from Phospho-specificity Experiment. § Data from Phospho-specificity Experiment are not shown.



# Endogenous Wes

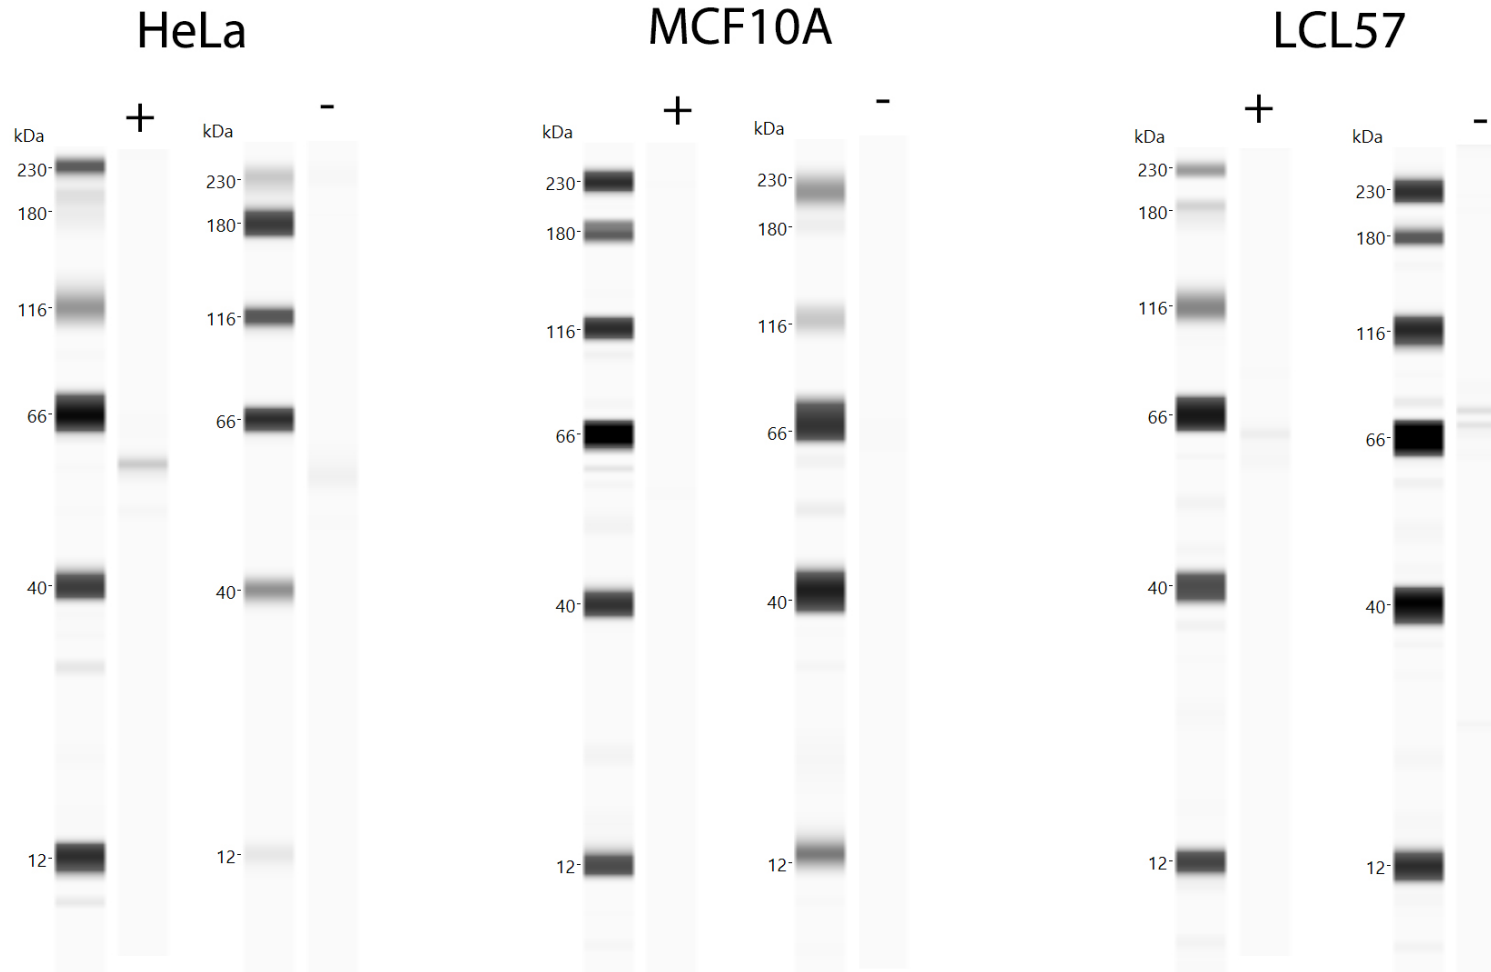

Expected molecular weight: 43 kDa

+ : irradiation treated cells  
- : not treated cells

31. CPTC-RTF1-1

| Technique | Analyte | Result |
|-----------|---------|--------|
| WB        | RecProt | N*     |
| West†     | HeLa    | N      |
|           | MCF10A  | N      |
|           | LCL57   | N      |
| WB        | HeLa    | NT     |
|           | MCF10A  | NT     |
|           | LCL57   | NT     |
| IF        | HeLa    | NT     |
|           | MCF10A  | NT     |
|           | LCL57   | NT     |
| SCWB      | HeLa    | NT     |
|           | MCF10A  | NT     |
|           | LCL57   | NT     |
| IP        | RecProt | NT     |
| IP        | HeLa    | NT     |
|           | MCF10A  | NT     |
|           | LCL57   | NT     |
| IHC       |         | P      |
| NCI60     |         | P      |

N – Negative, NT – Not Tested, \* Data not shown  
† Data shown are from Phospho-specificity Experiment.

# Endogenous Wes

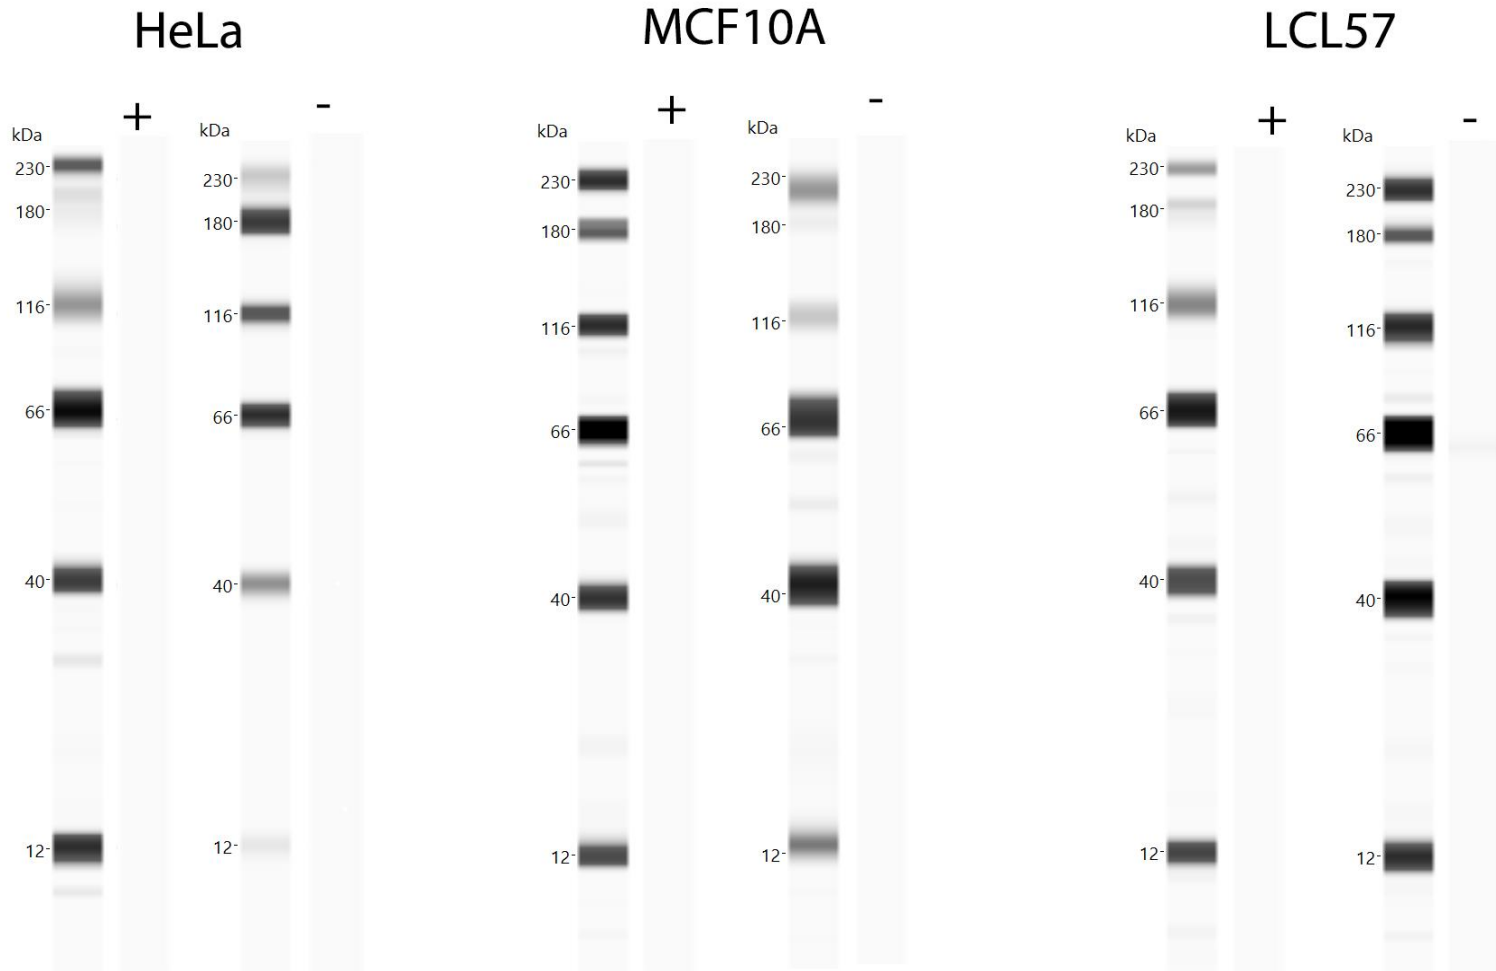

Expected molecular weight: 66 kDa

+ : irradiation treated cells  
- : not treated cells

# CPTC- RTF1-1

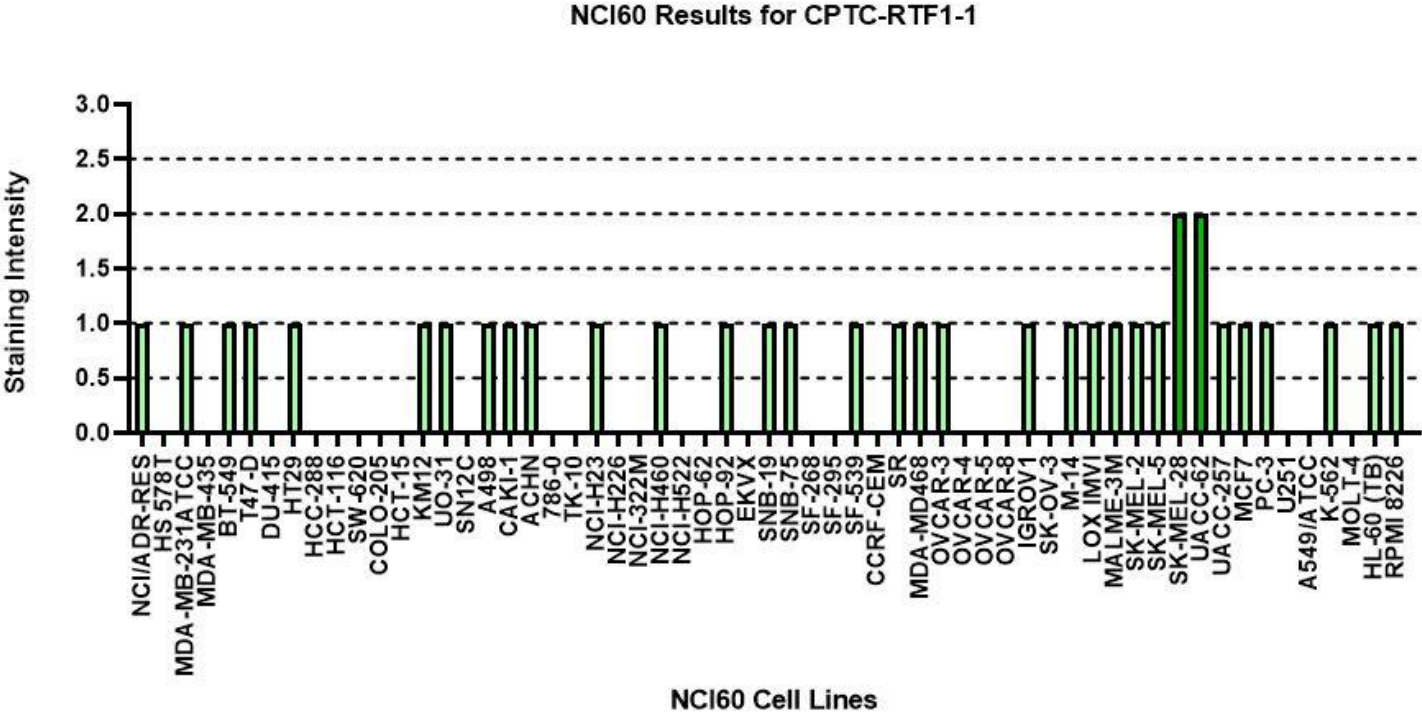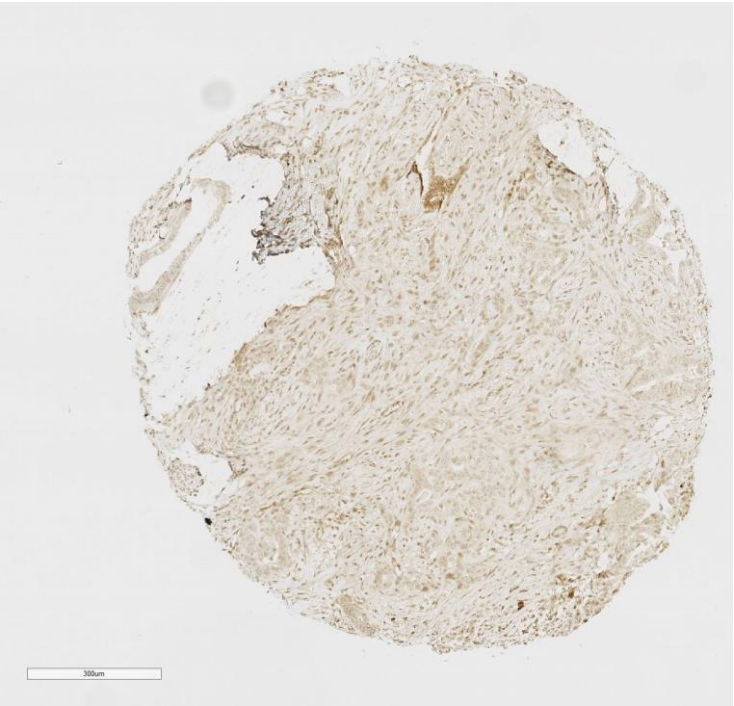

32. CPTC-RTF1-2

| Technique | Analyte | Result |
|-----------|---------|--------|
| WB        | RecProt | N*     |
| West†     | HeLa    | N      |
|           | MCF10A  | N      |
|           | LCL57   | N      |
| WB        | HeLa    | NT     |
|           | MCF10A  | NT     |
|           | LCL57   | NT     |
| IF        | HeLa    | NT     |
|           | MCF10A  | NT     |
|           | LCL57   | NT     |
| SCWB      | HeLa    | NT     |
|           | MCF10A  | NT     |
|           | LCL57   | NT     |
| IP        | RecProt | NT     |
| IP        | HeLa    | NT     |
|           | MCF10A  | NT     |
|           | LCL57   | NT     |
| IHC       |         | P      |
| NCI60     |         | P      |

N – Negative, NT – Not Tested, \* Data not shown  
† Data shown are from Phospho-specificity Experiment.

# Endogenous Wes

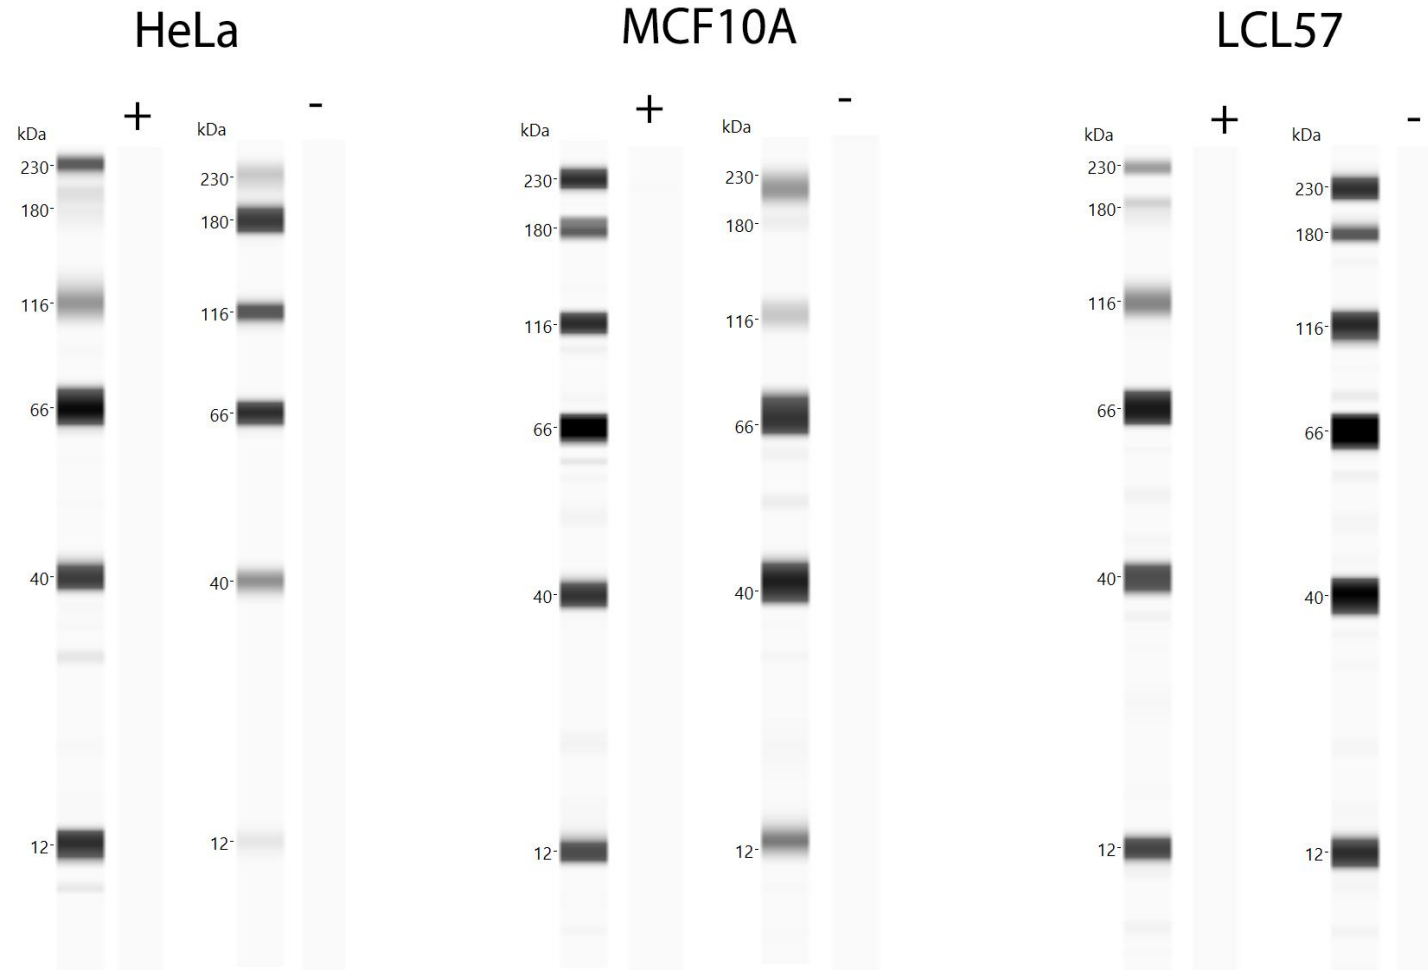

# CPTC-RTF1-2

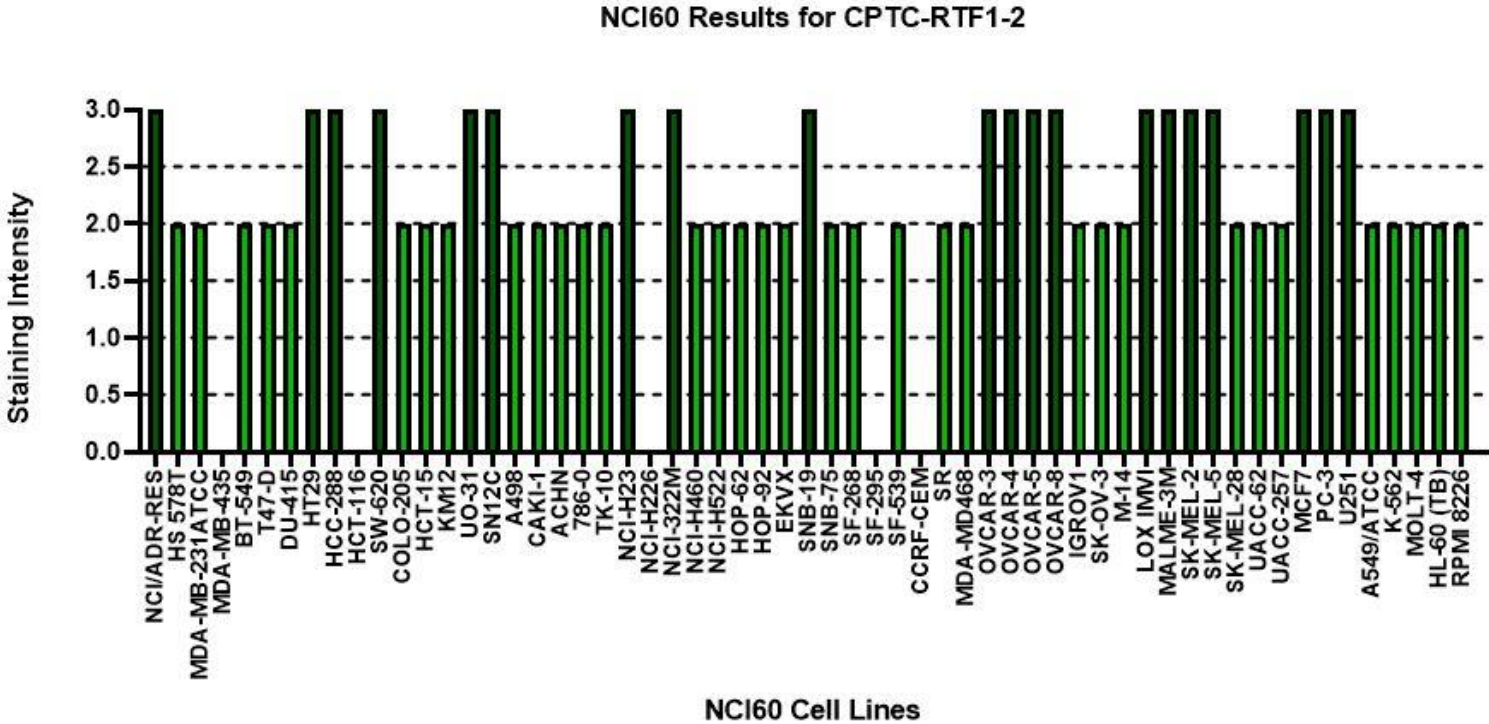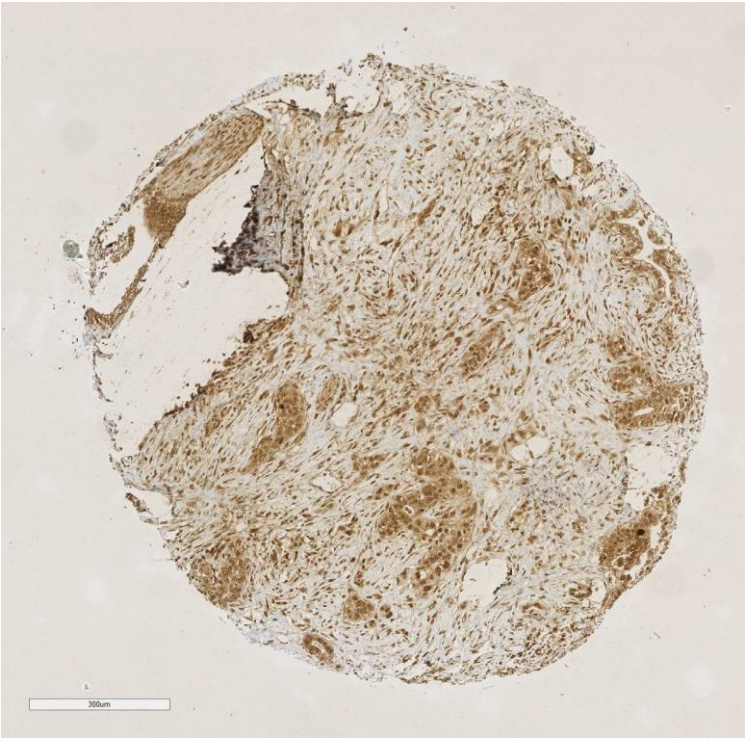

33. CPTC-SAAL1-1

| Technique | Analyte | Result |
|-----------|---------|--------|
| WB        | RecProt | P      |
| Wes       | HeLa    | U      |
|           | MCF10A  | P      |
|           | LCL57   | P      |
|           |         |        |
| WB        | HeLa    | N      |
|           | MCF10A  | N      |
|           | LCL57   | P      |
| IF        | HeLa    | N†     |
|           | MCF10A  | N†     |
|           | LCL57   | P      |
| SCWB†     | HeLa    | N      |
|           | MCF10A  | N      |
|           | LCL57   | N      |
| IP*       | RecProt | P      |
| IP*       | HeLa    | N      |
|           | MCF10A  | N      |
|           | LCL57   | N      |
| IHC       |         | N†     |
| NCI60     |         | NT     |

P – Positive, N – Negative, U – Undetermined, \*Please refer to tables for results, † Data not shown



## WB against commercial recombinant protein

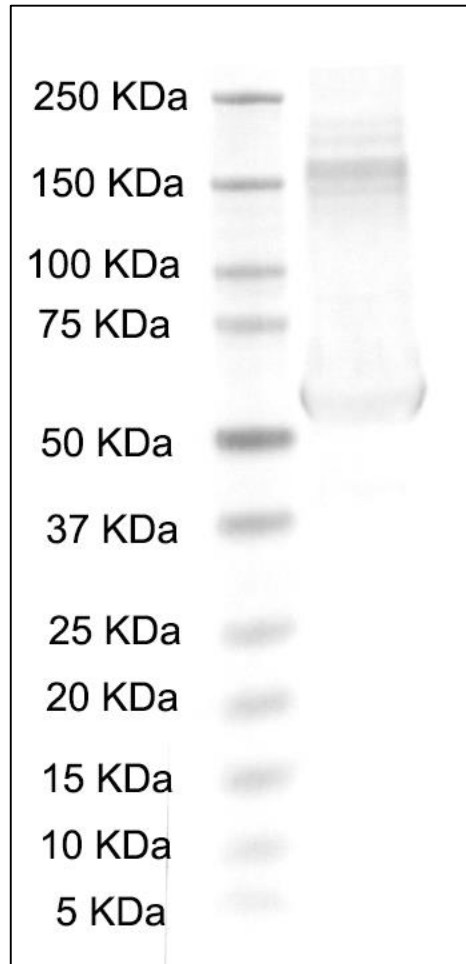

Ag Vendor: Origene

Cat #: TP304551

Description: Recombinant protein of human serum amyloid A-like 1 (SAAL1)

Predicted MW: 53.4 kDa

## Endogenous WB

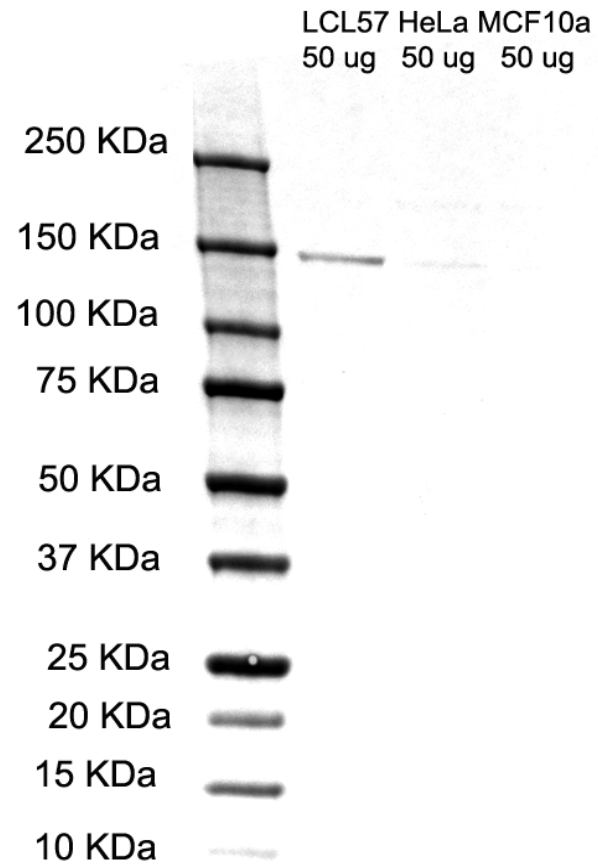

## Endogenous Wes

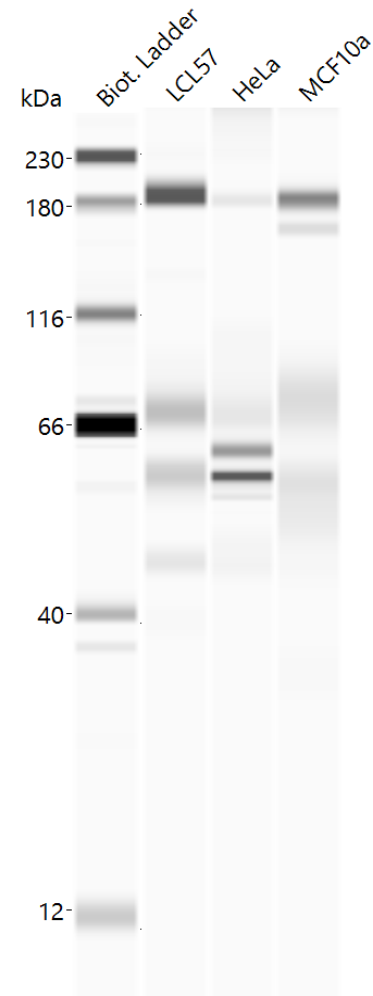

# Immunofluorescence - LCL57

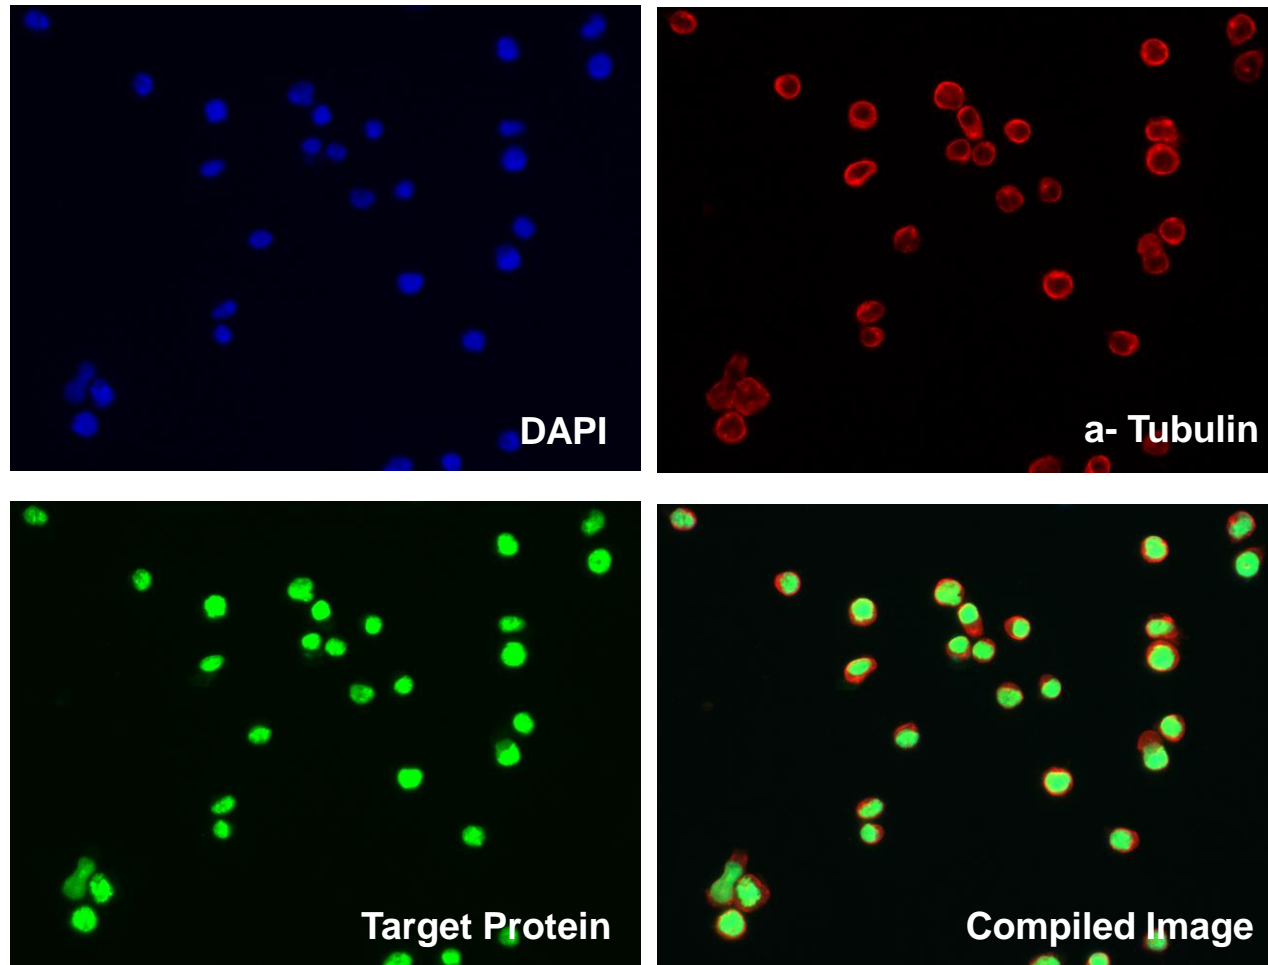

Subcellular Location: Nucleus

34. CPTC-TNFRSF17-1

| Technique | Analyte | Result |
|-----------|---------|--------|
| WB        | RecProt | N*     |
| West†     | HeLa    | N      |
|           | MCF10A  | U      |
|           | LCL57   | N      |
| WB§       | HeLa    | N      |
|           | MCF10A  | N      |
|           | LCL57   | N      |
| IF        | HeLa    | NT     |
|           | MCF10A  | NT     |
|           | LCL57   | NT     |
| SCWB      | HeLa    | NT     |
|           | MCF10A  | NT     |
|           | LCL57   | NT     |
| IP        | RecProt | NT     |
| IP        | HeLa    | NT     |
|           | MCF10A  | NT     |
|           | LCL57   | NT     |
| IHC       |         | N*     |
| NCI60     |         | NT     |

U – Uncertain, N – Negative, NT – Not Tested, \* Data not shown  
† Data shown are from Phospho-specificity Experiment. § Data from Phospho-specificity Experiment are not shown.

# Endogenous Wes

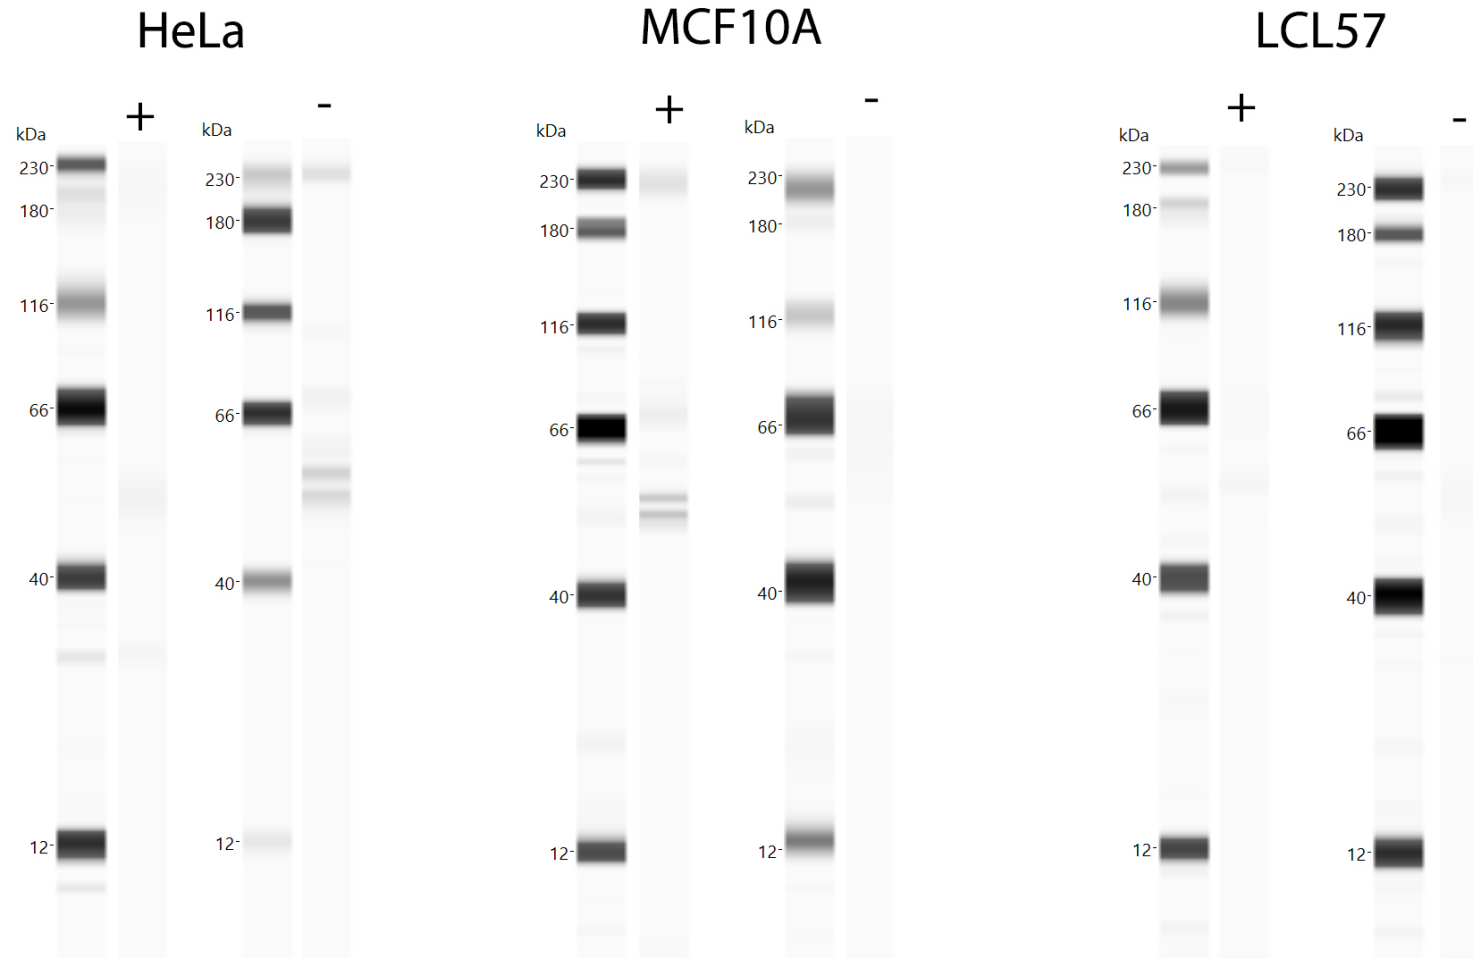

Expected molecular weight: 20, 15 kDa

+ : irradiation treated cells  
- : not treated cells

35. CPTC-TP53-1

| Technique | Analyte | Result |
|-----------|---------|--------|
| WB        | RecProt | P      |
| Wes       | HeLa    | P      |
|           | MCF10A  | N      |
|           | LCL57   | N      |
| WB        | HeLa    | U      |
|           | MCF10A  | U      |
|           | LCL57   | U      |
| IF        | HeLa    | P      |
|           | MCF10A  | P      |
|           | LCL57   | P      |
| SCWB†     | HeLa    | N      |
|           | MCF10A  | N      |
|           | LCL57   | N      |
| IP*       | RecProt | P      |
| IP*       | HeLa    | N      |
|           | MCF10A  | N      |
|           | LCL57   | N      |
| IHC       |         | N†     |
| NCI60     |         | NT     |

P – Positive, N – Negative, U – Undetermined, \* Please refer to tables for results, † Data not shown

# WB against commercial recombinant protein

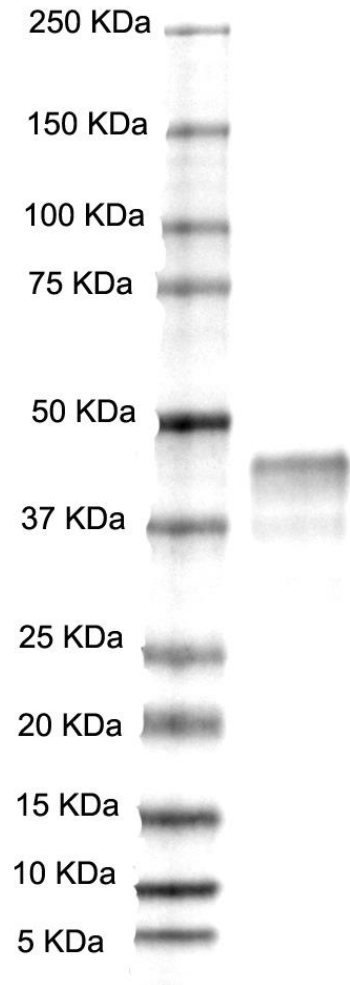

Ag Vendor: Origene

Cat #: TP300003

Description: Recombinant protein of human tumor protein p53 (TP53), transcript variant 1

Predicted MW 43.5 KDa

## Endogenous WB

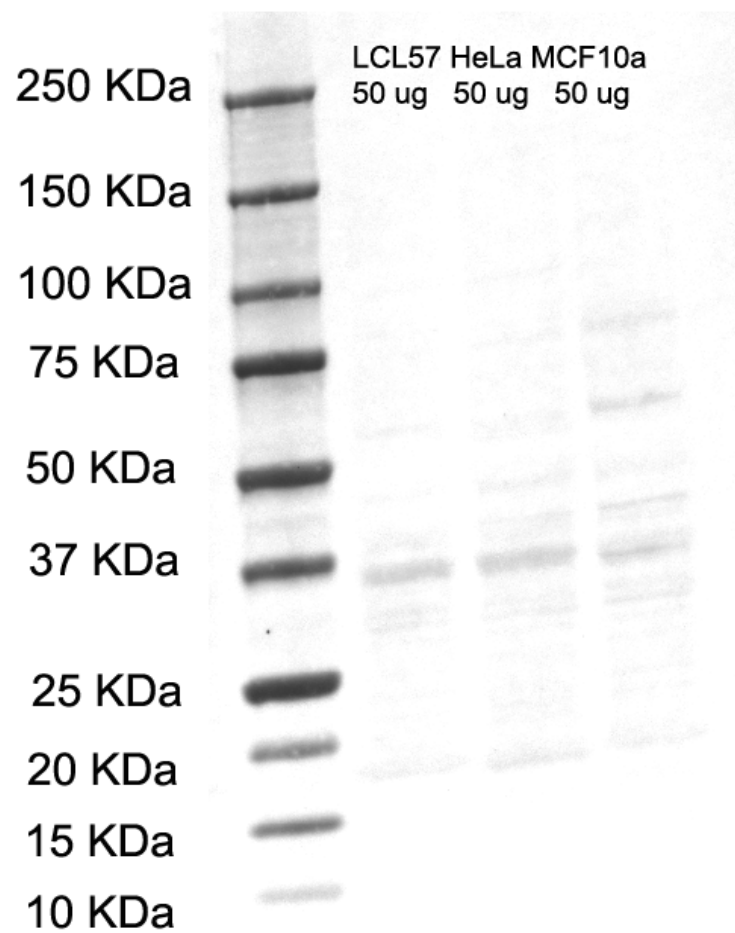

## Endogenous Wes

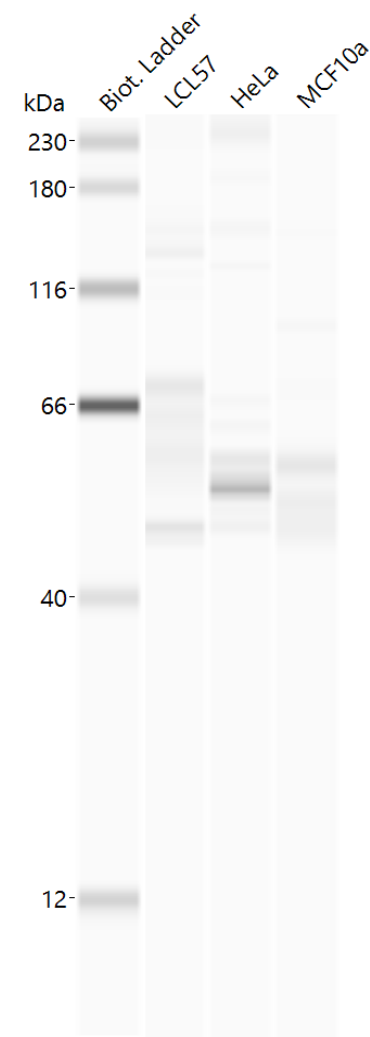



# Immunofluorescence – HeLa

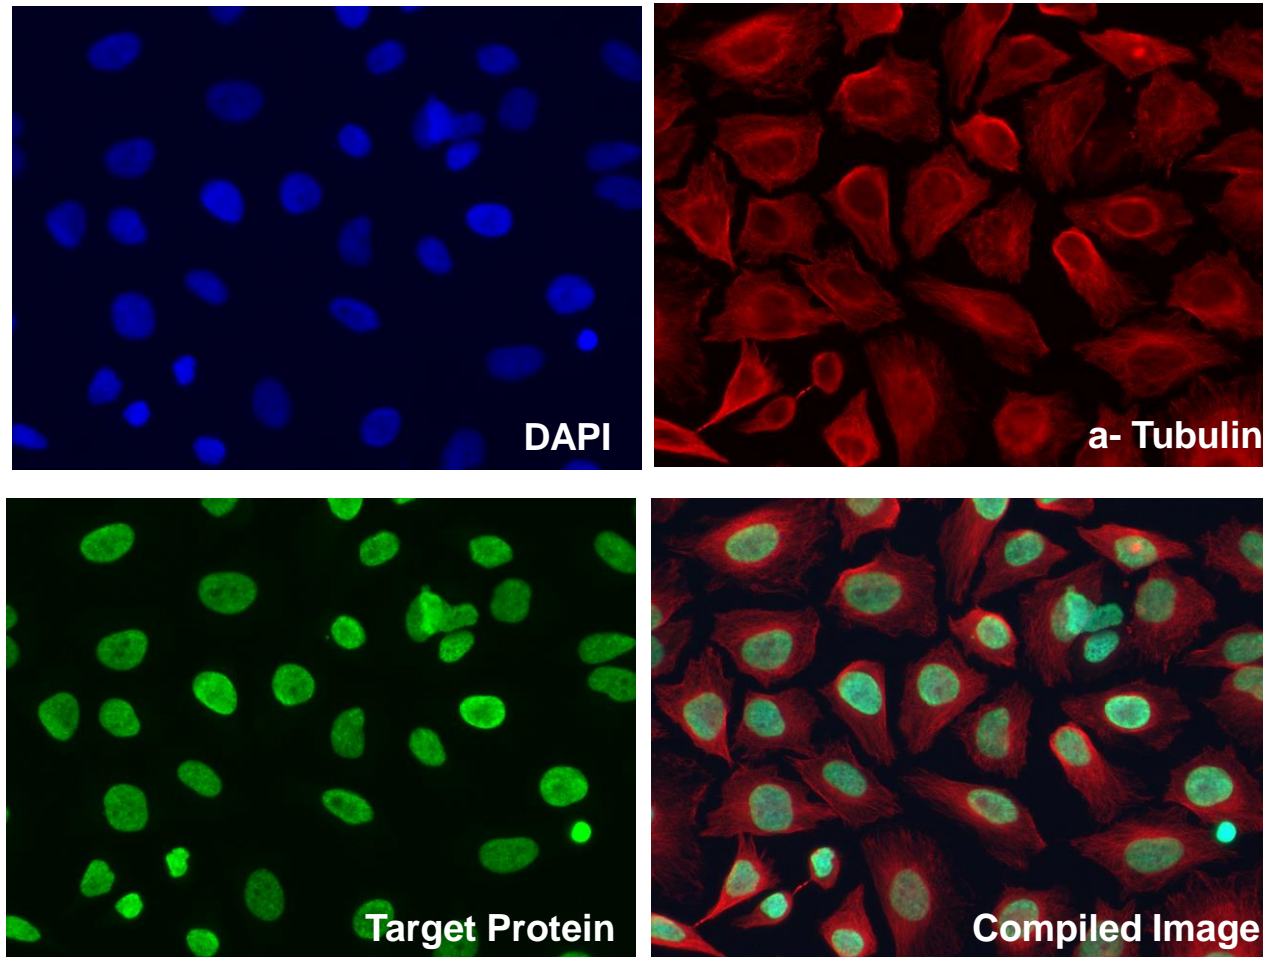

Subcellular location: Cytoskeleton, Mitochondrion, Nucleus, Endoplasmic reticulum, Other

## Immunofluorescence – MCF10A

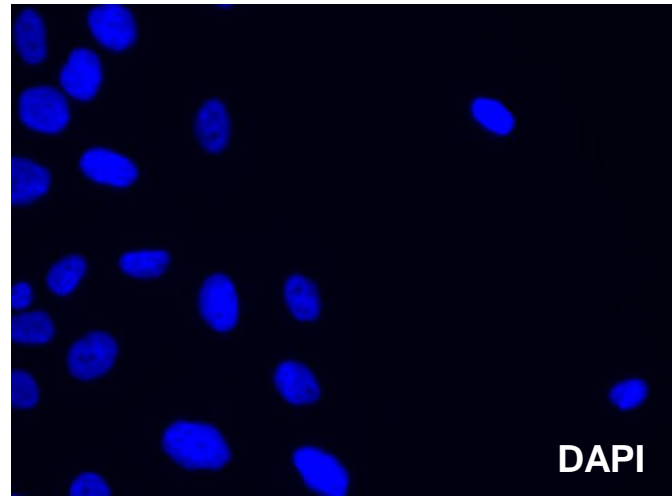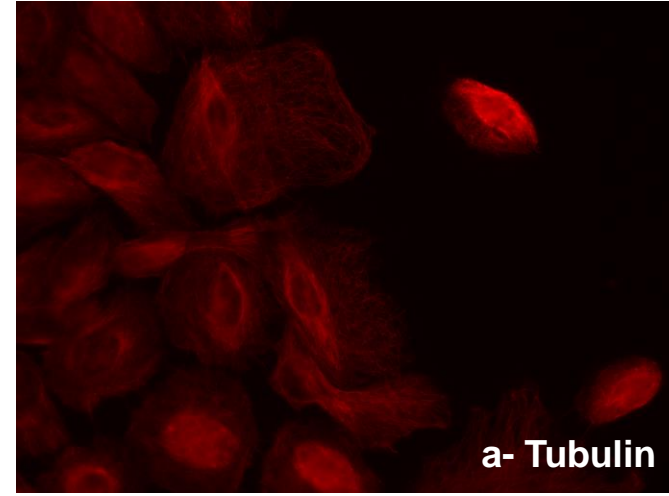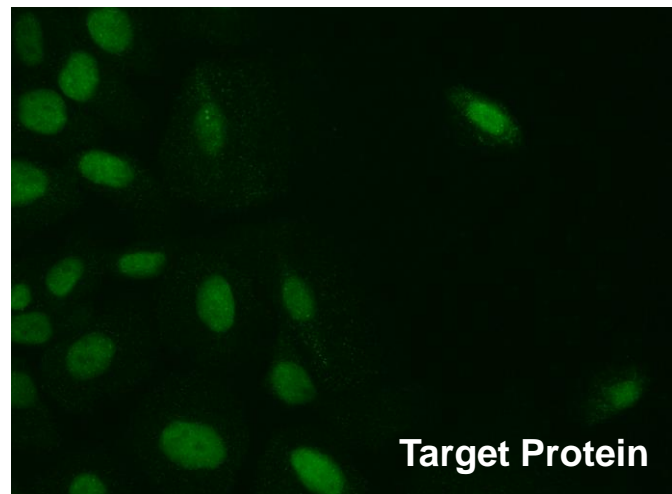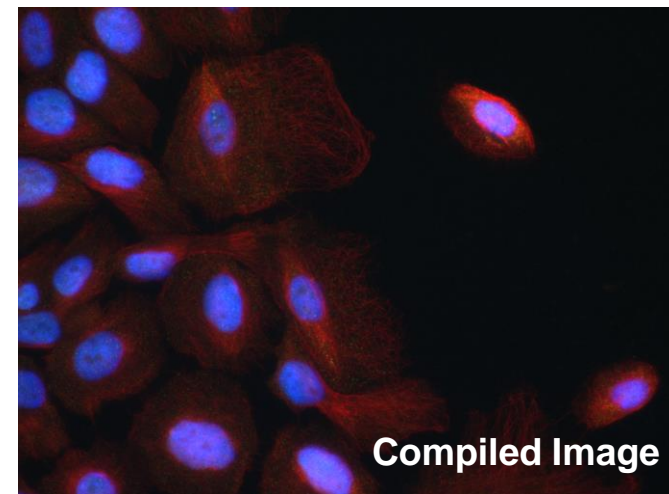

Subcellular location: Cytoskeleton, Mitochondrion, Nucleus, Endoplasmic reticulum, Other

## Immunofluorescence – LCL57

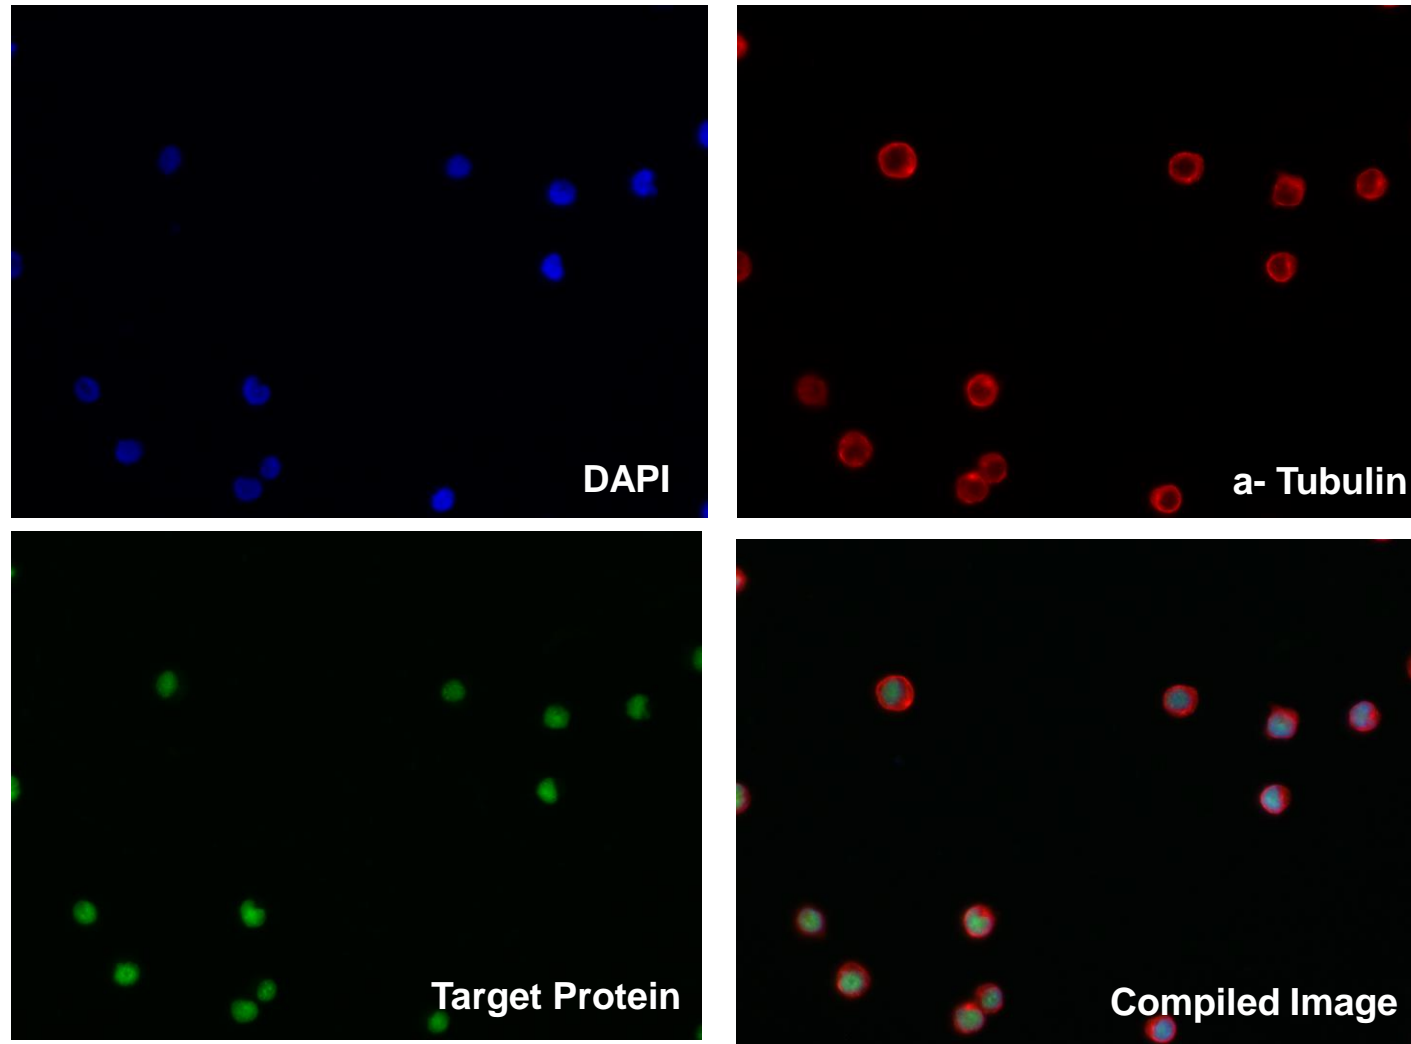

Subcellular location: Cytoskeleton, Mitochondrion, Nucleus, Endoplasmic reticulum, Other

36. CPTC-TP53-2

| Technique | Analyte | Result |
|-----------|---------|--------|
| WB        | RecProt | P      |
| Wes       | HeLa    | P      |
|           | MCF10A  | P      |
|           | LCL57   | P      |
| WB        | HeLa    | P      |
|           | MCF10A  | P      |
|           | LCL57   | P      |
| IF        | HeLa    | P      |
|           | MCF10A  | P      |
|           | LCL57   | P      |
| SCWB      | HeLa    | P      |
|           | MCF10A  | P      |
|           | LCL57   | P      |
| IP*       | RecProt | P      |
| IP*       | HeLa    | N      |
|           | MCF10A  | N      |
|           | LCL57   | N      |
| IHC       |         | P      |
| NCI60     |         | P      |

P – Positive, N – Negative, \*Please refer to tables for results

# WB against commercial recombinant protein

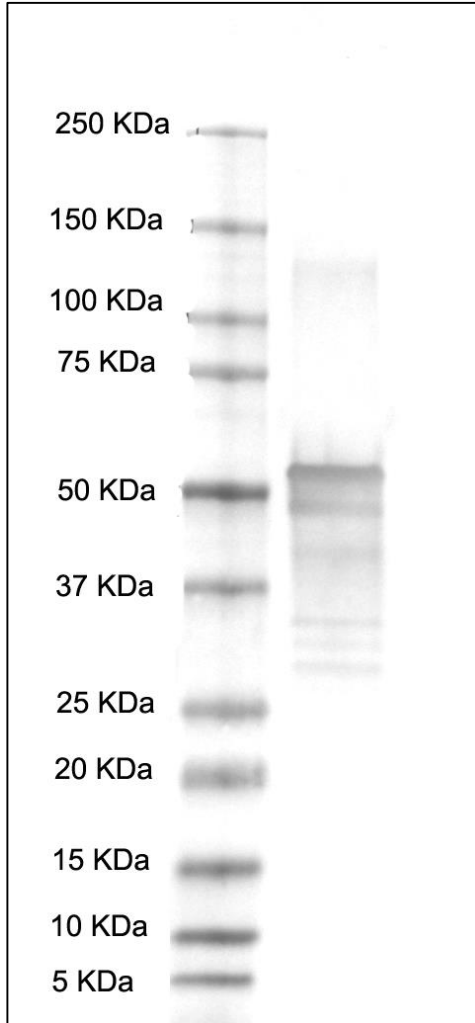

Ag Vendor: Origene

Cat #: TP300003

Description: Recombinant protein of human tumor protein p53 (TP53), transcript variant 1

Predicted MW 43.5 KDa

## Endogenous WB

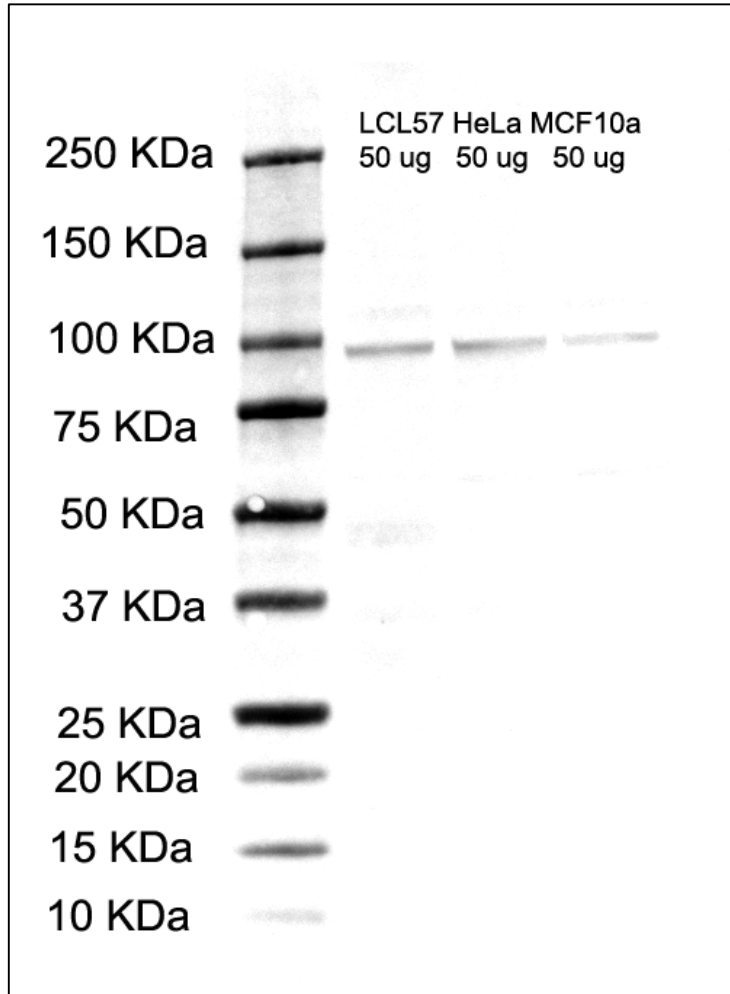

## Endogenous Wes

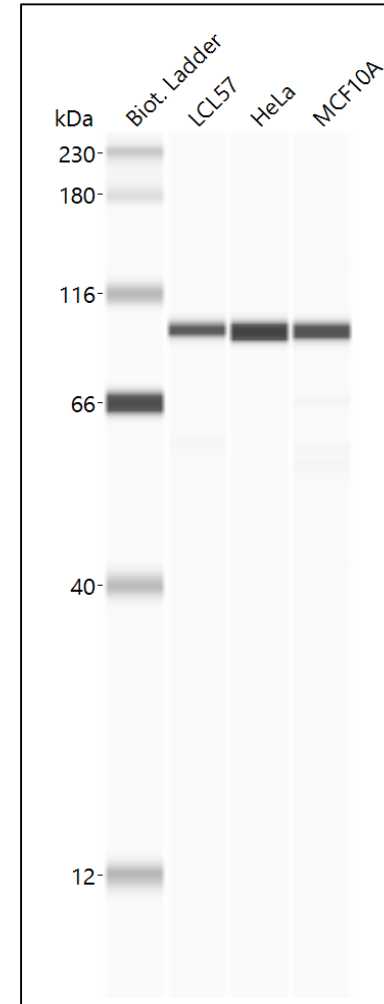

# Immunofluorescence – HeLa

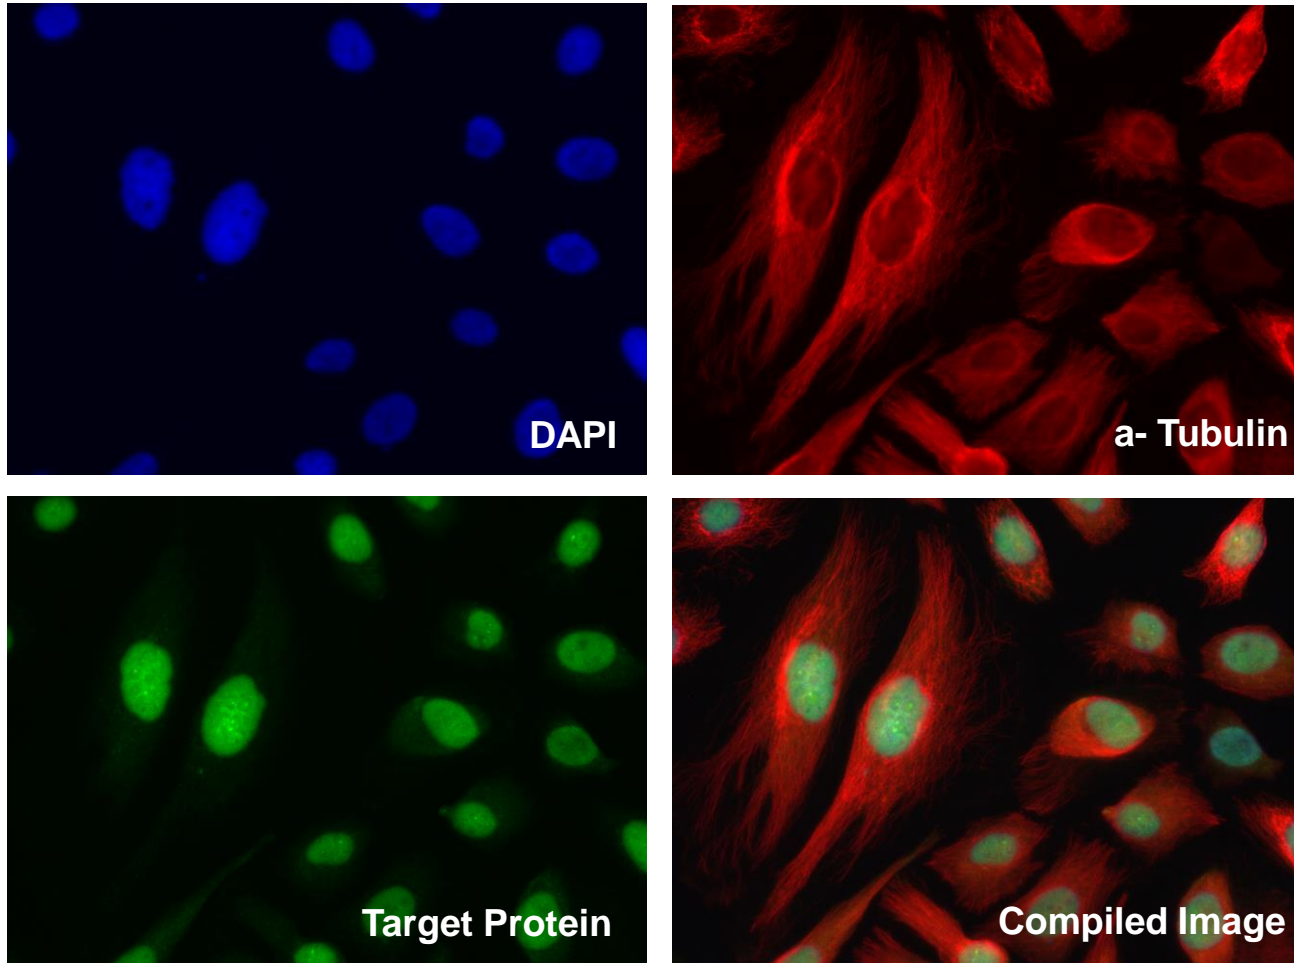

Subcellular location: Cytoskeleton, Mitochondrion, Nucleus, Endoplasmic reticulum, Other



## Immunofluorescence – MCF10A

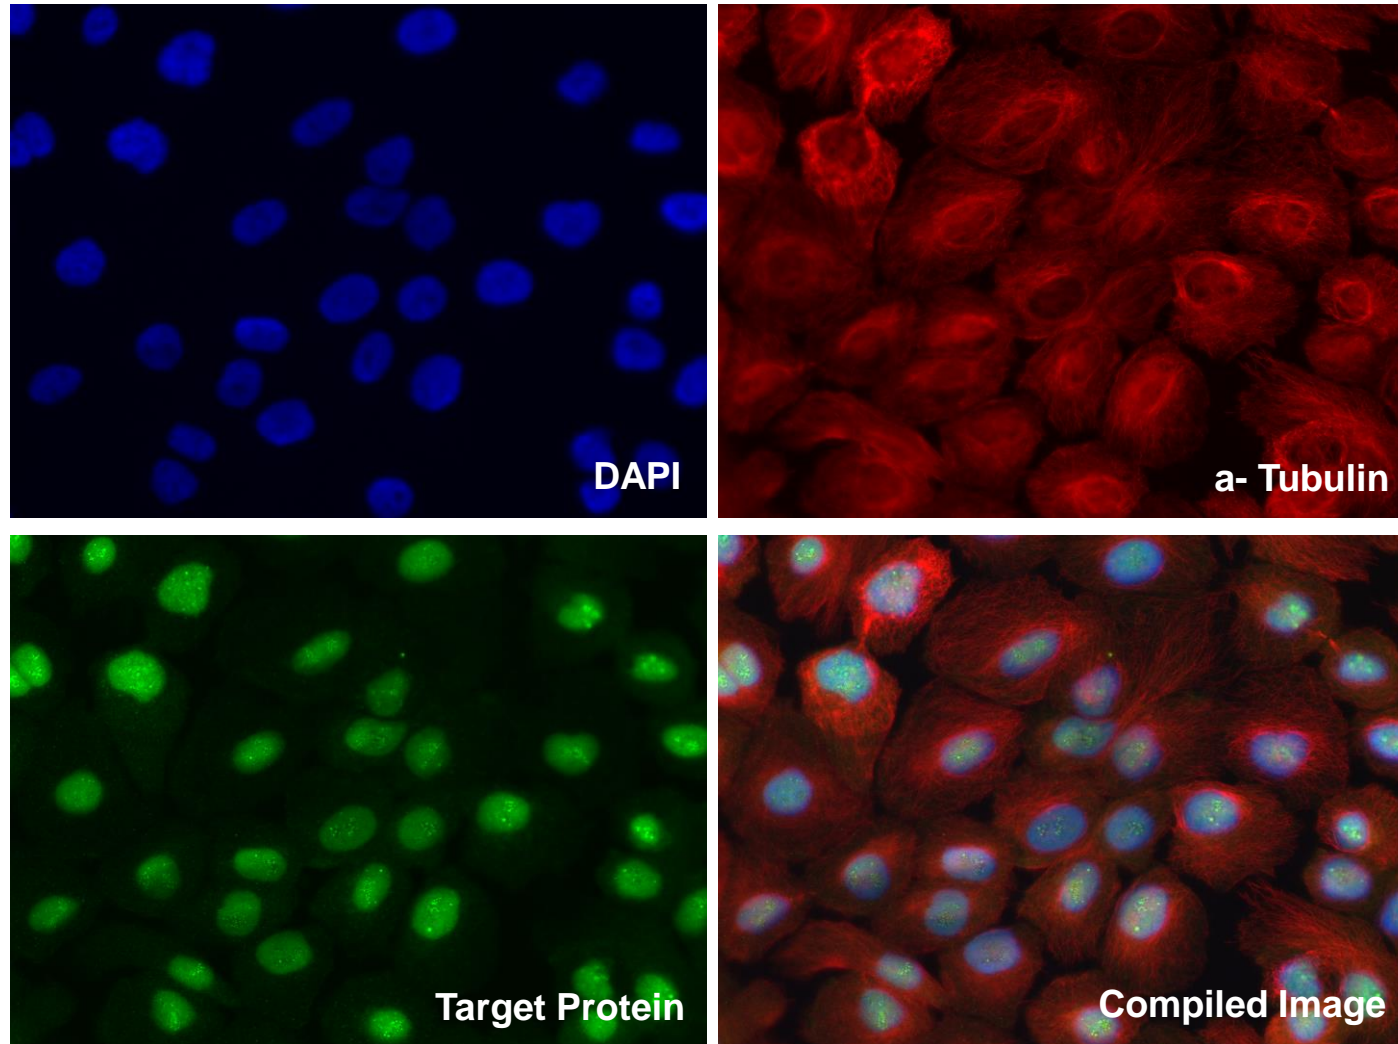

Subcellular location: Cytoskeleton, Mitochondrion, Nucleus, Endoplasmic reticulum, Other



## Immunofluorescence – LCL57

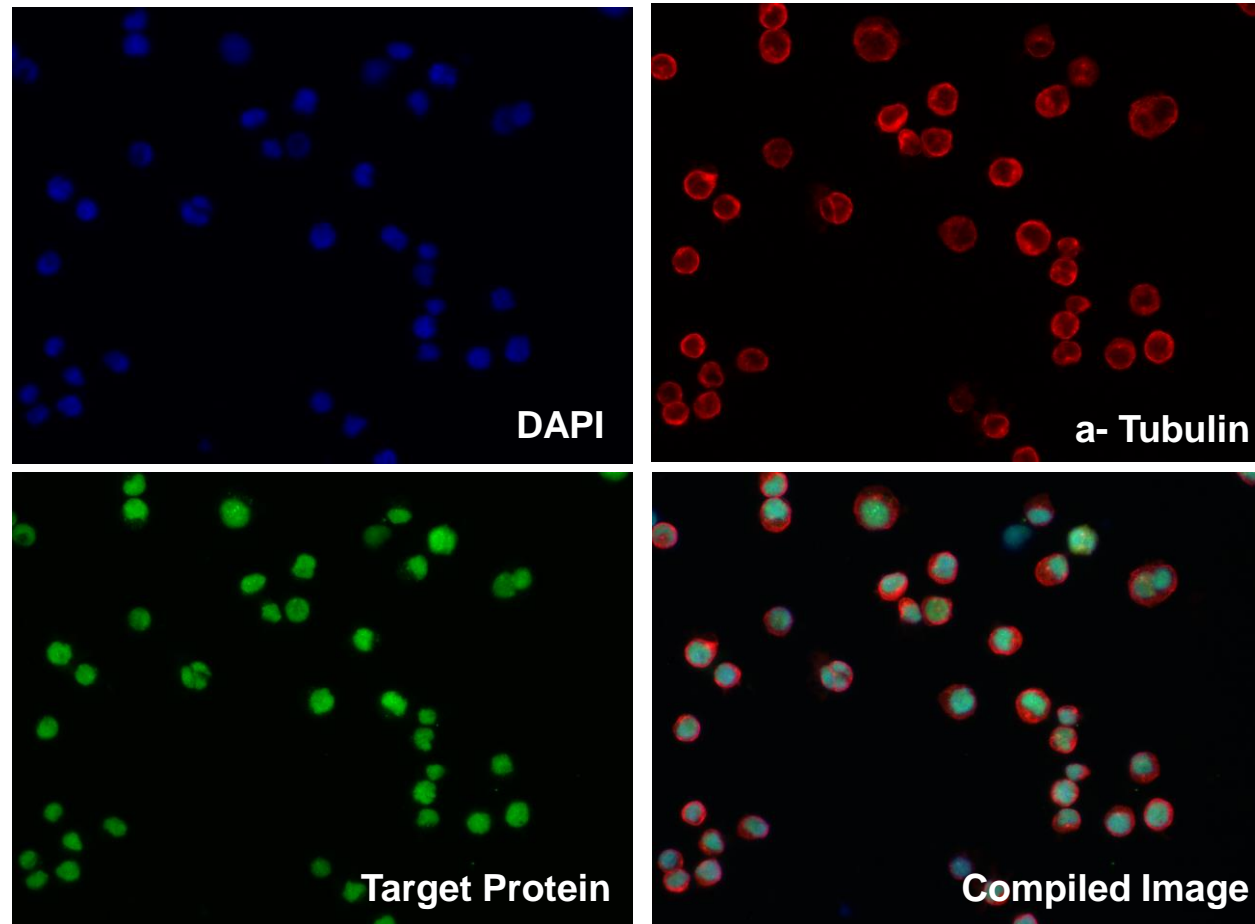

Subcellular location: Cytoskeleton, Mitochondrion, Nucleus, Endoplasmic reticulum, Other

# Single Cell Western Blot

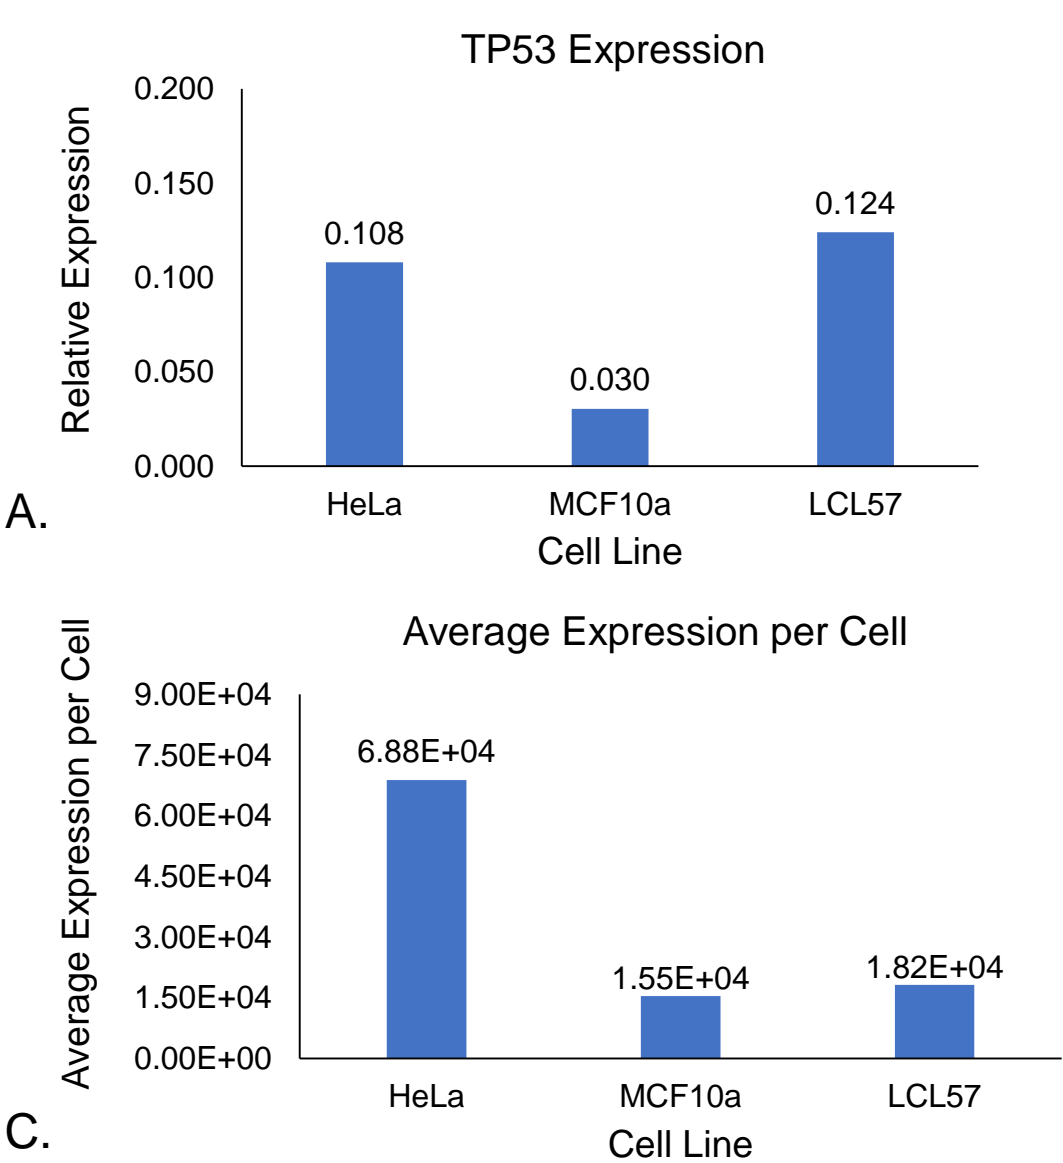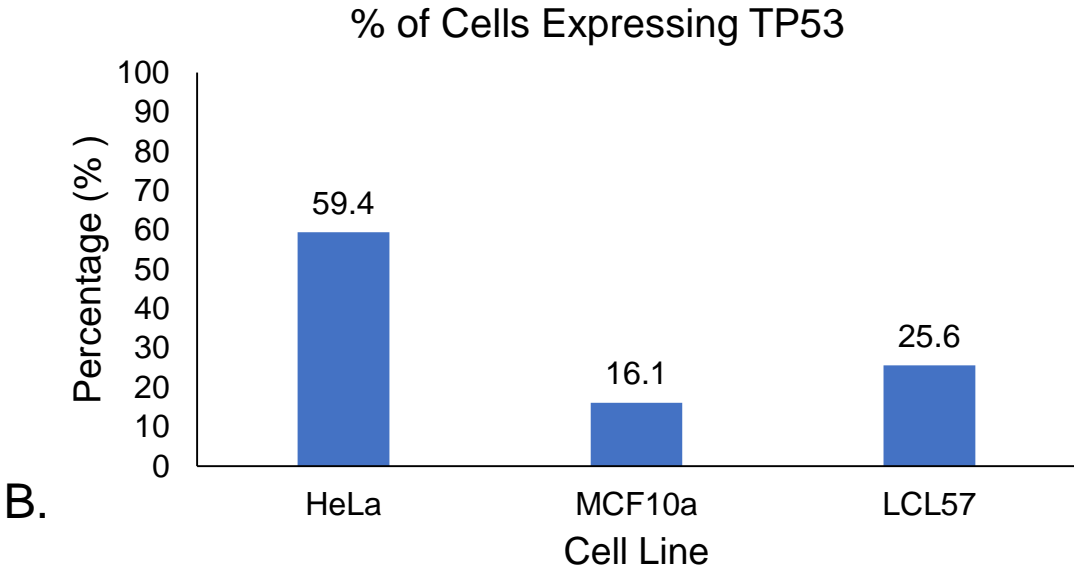

Single cell western blot data for TP53 (44 kDa band). Relative expression of total TP53 (44 kDa) in HeLa, MCF10A, and LCL57 cells (A). Percentage of cells that express TP53 (B). Average expression of TP53 protein per cell (C). All data is normalized to  $\beta$ -tubulin expression.

# CPTC-TP53-2

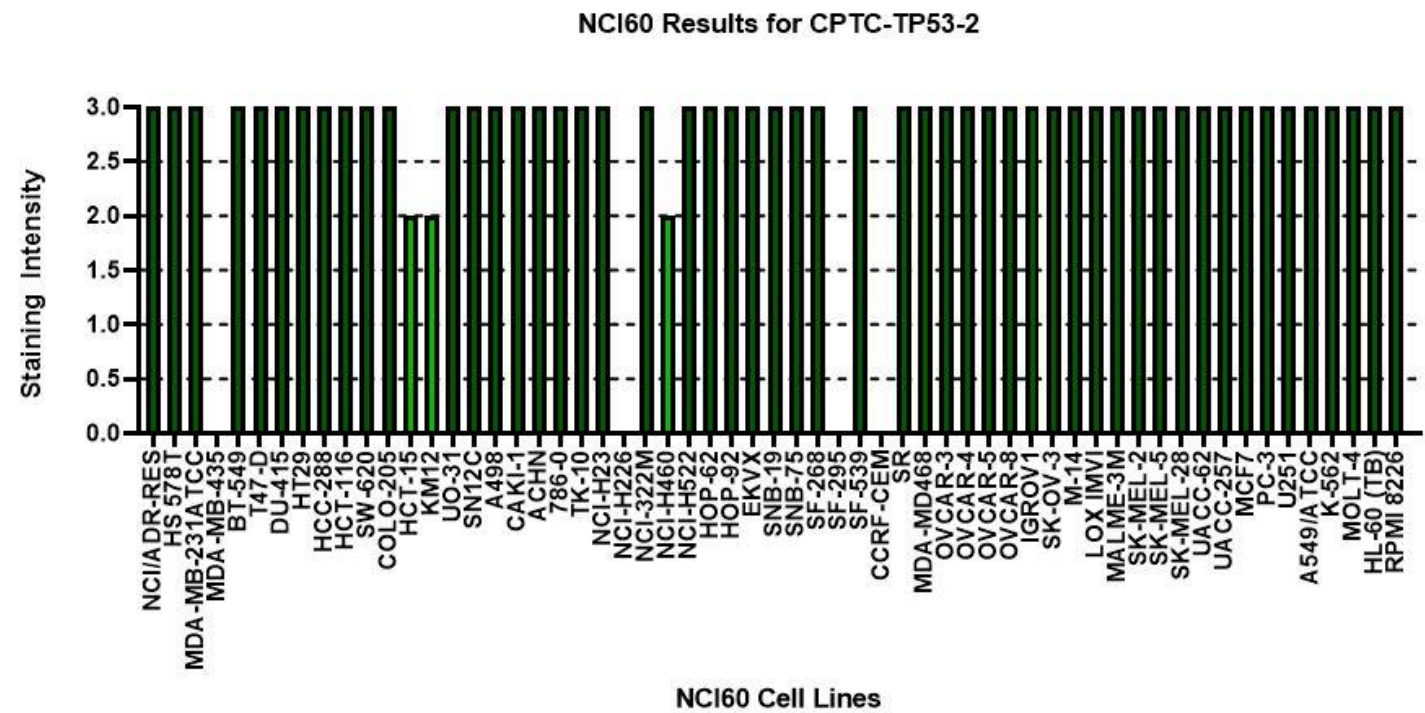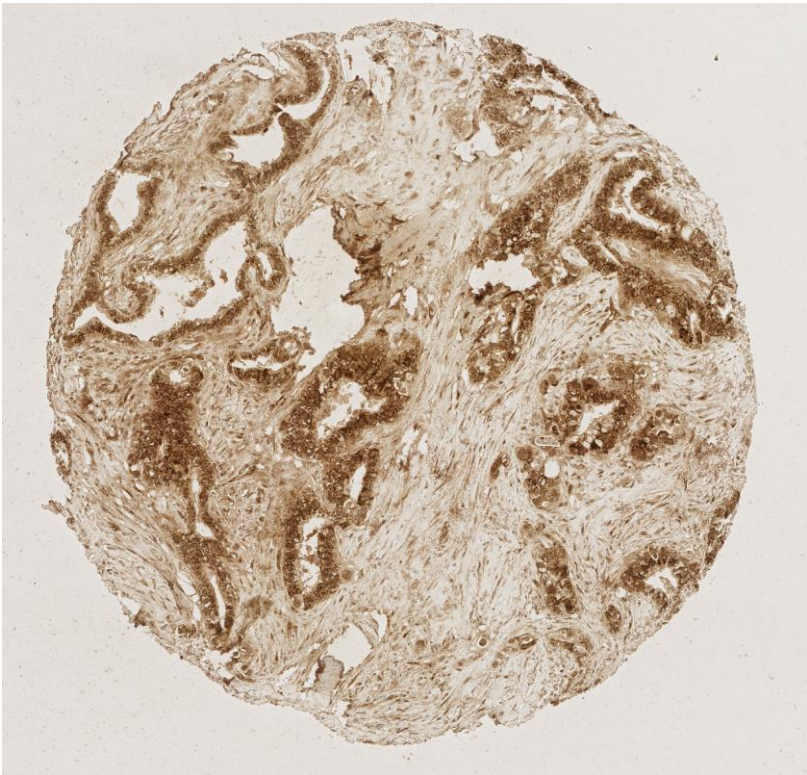

37. CPTC-TP53BP1-1

| Technique | Analyte | Result |
|-----------|---------|--------|
| WB        | RecProt | P      |
| Wes       | HeLa    | NT     |
|           | MCF10A  | NT     |
|           | LCL57   | NT     |
| WB        | HeLa    | U      |
|           | MCF10A  | U      |
|           | LCL57   | U      |
| IF        | HeLa    | P      |
|           | MCF10A  | P      |
|           | LCL57   | P      |
| SCWB      | HeLa    | NT     |
|           | MCF10A  | NT     |
|           | LCL57   | NT     |
| IP*       | RecProt | NT     |
| IP*       | HeLa    | W      |
|           | MCF10A  | N      |
|           | LCL57   | P      |
| IHC       |         | P      |
| NCI60     |         | P      |

P – Positive, N – Negative, U – Undetermined, W – Weak, NT – Not Tested, \* Please refer to tables for results

## WB against commercial recombinant protein

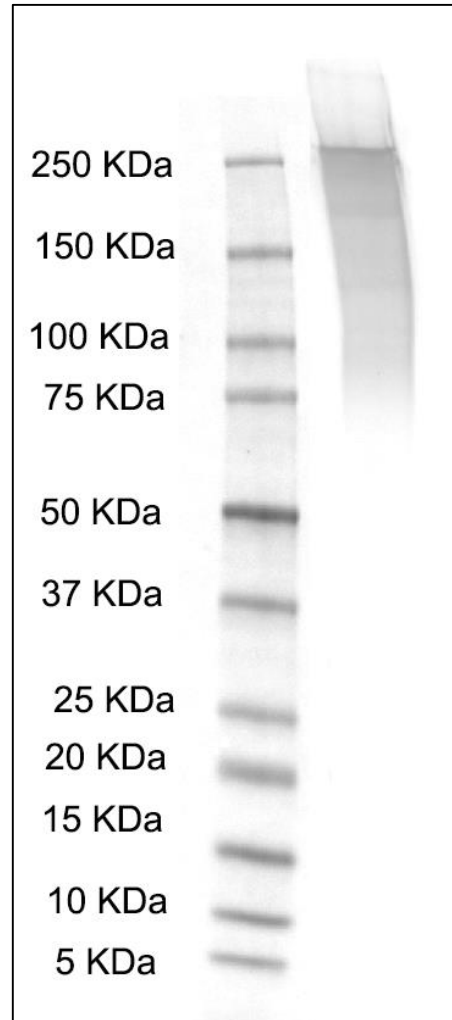

Ag Vendor: Origene

Cat #: TP318016

Description: Recombinant protein of human tumor protein p53 binding protein 1 (TP53BP1), transcript variant 3

Predicted MW: 213.4 kDa

# Endogenous WB

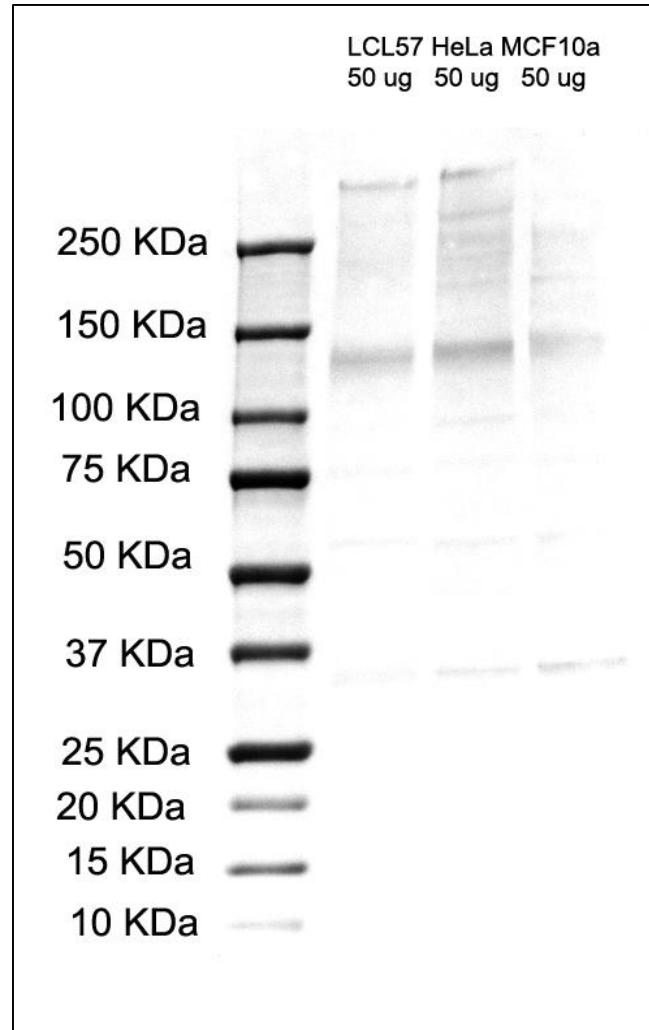

# Immunofluorescence – HeLa

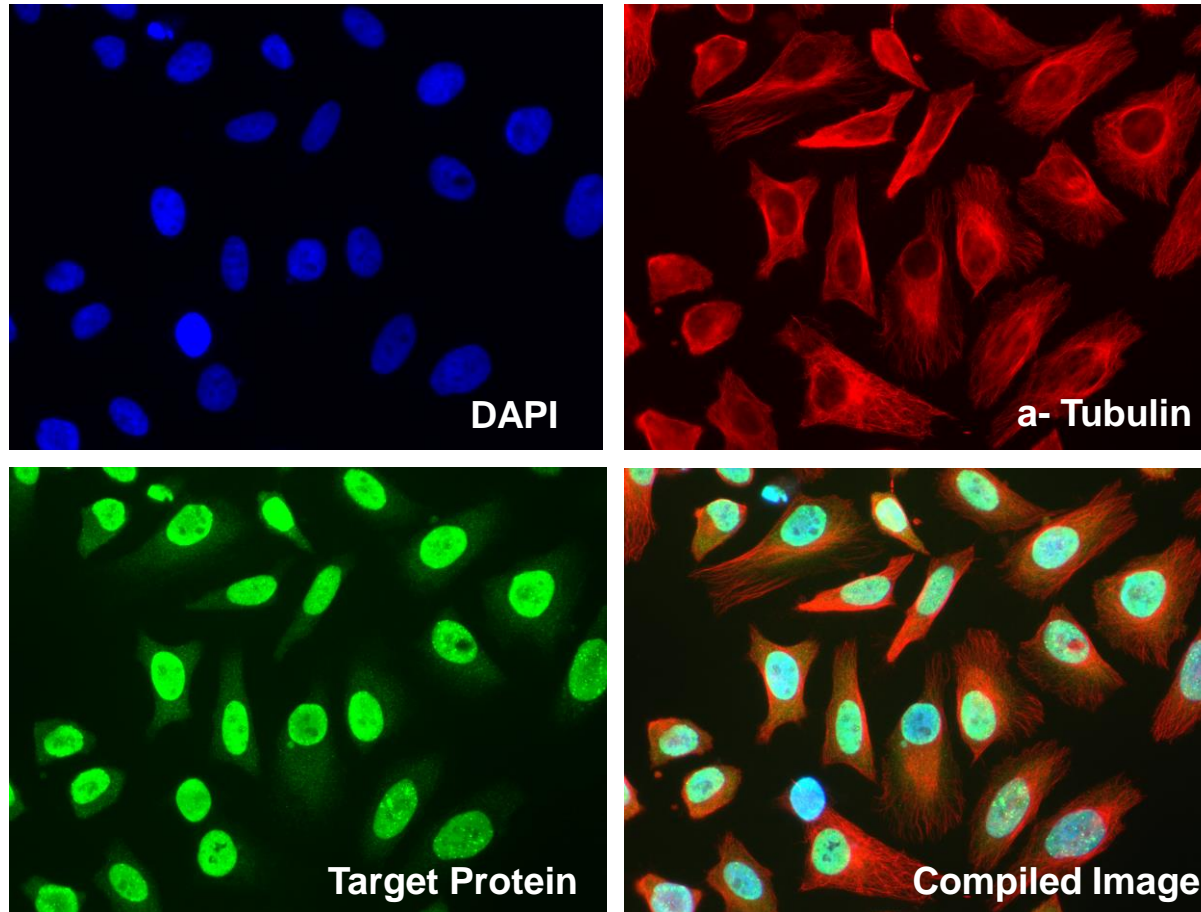

Subcellular location: Nucleus, Other  
Primary Antibody concentration – 0.5 ug/mL



# Immunofluorescence – MCF10A

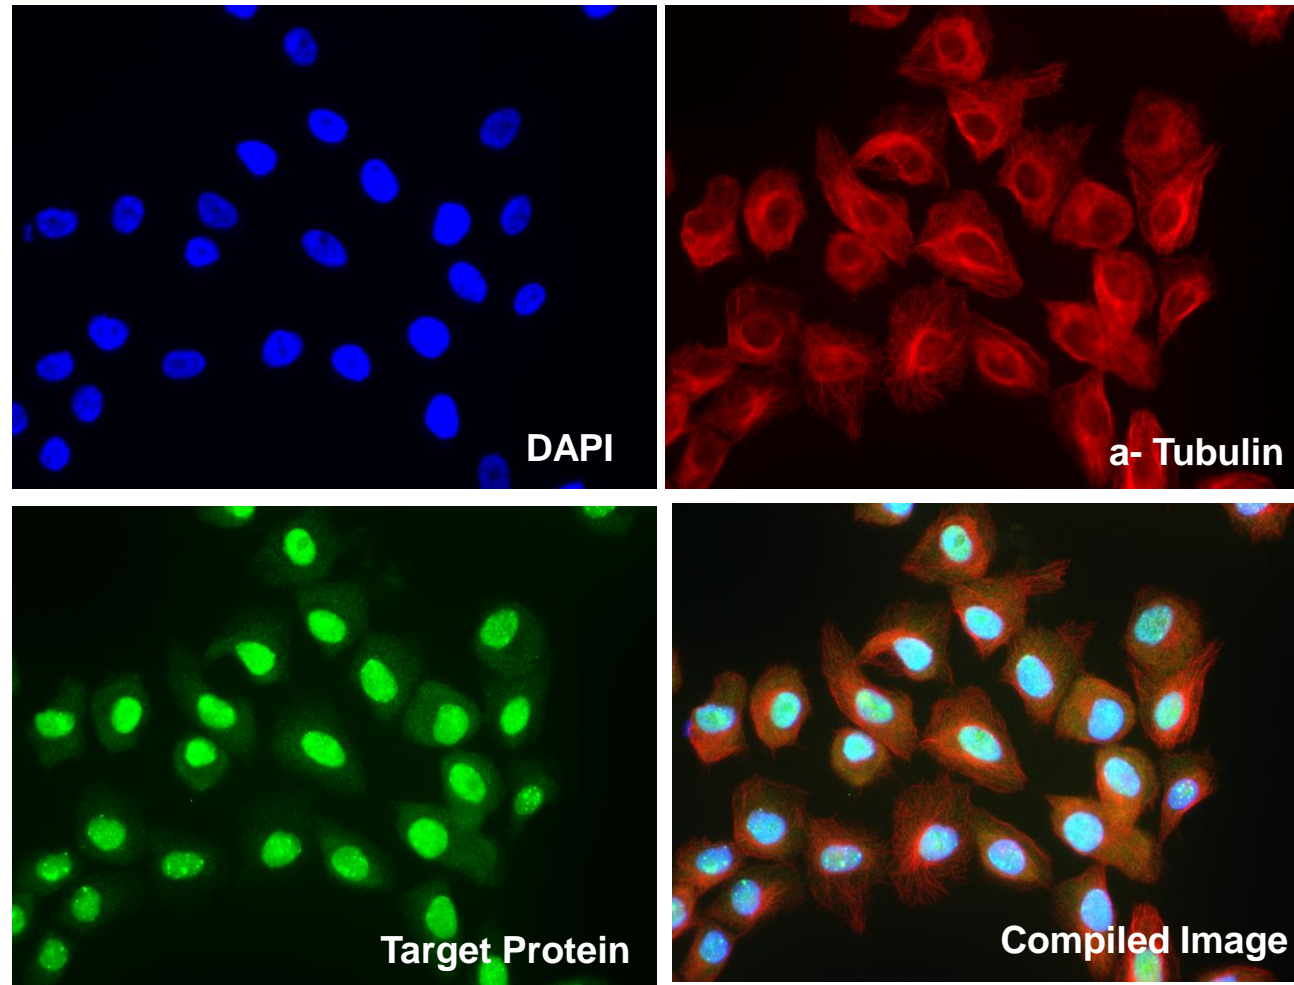

Subcellular location: Nucleus, Other  
Primary Antibody concentration – 0.5  $\mu\text{g/mL}$



## Immunofluorescence – LCL57

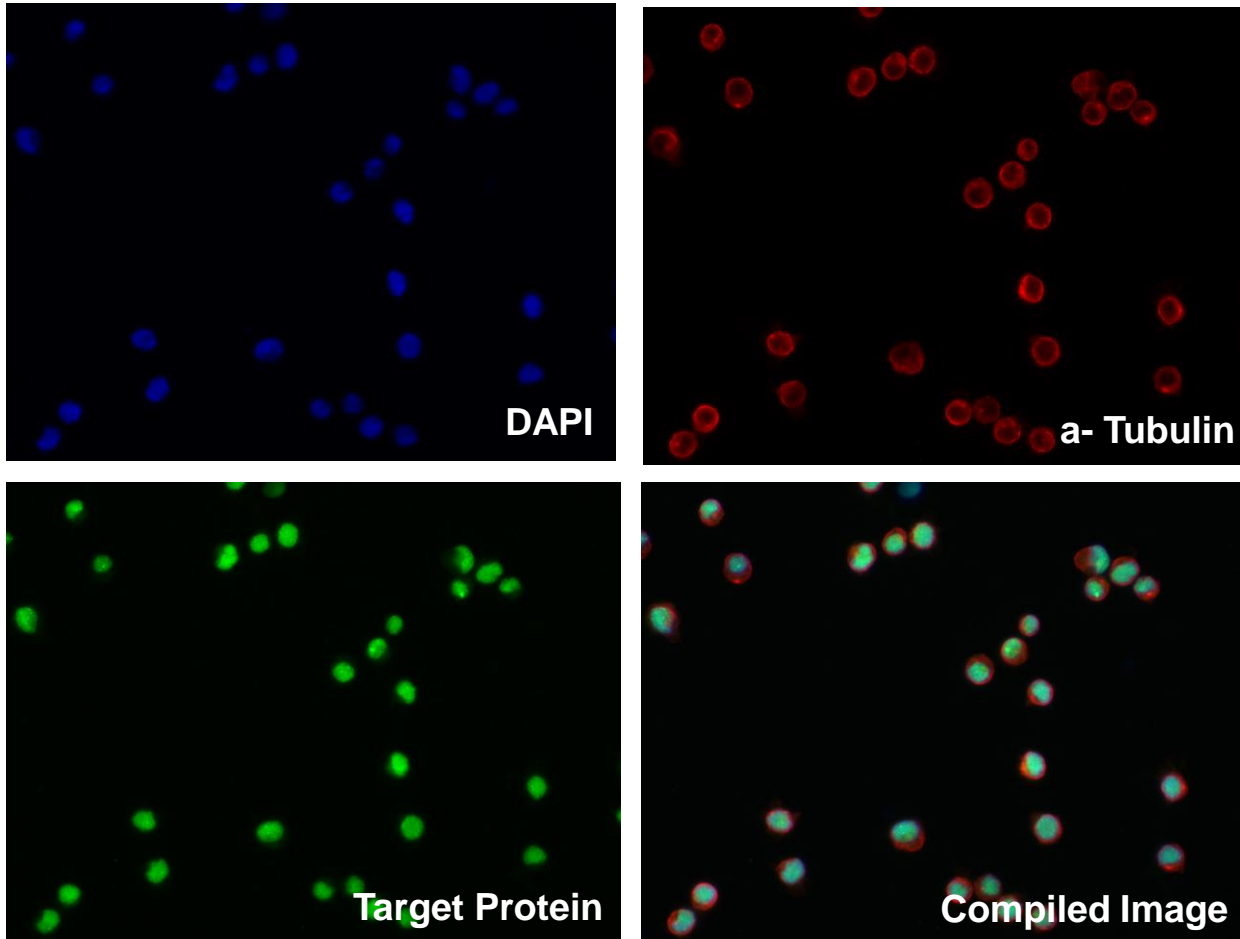

Subcellular location: Nucleus, Other

# CPTC-TP53BP-1

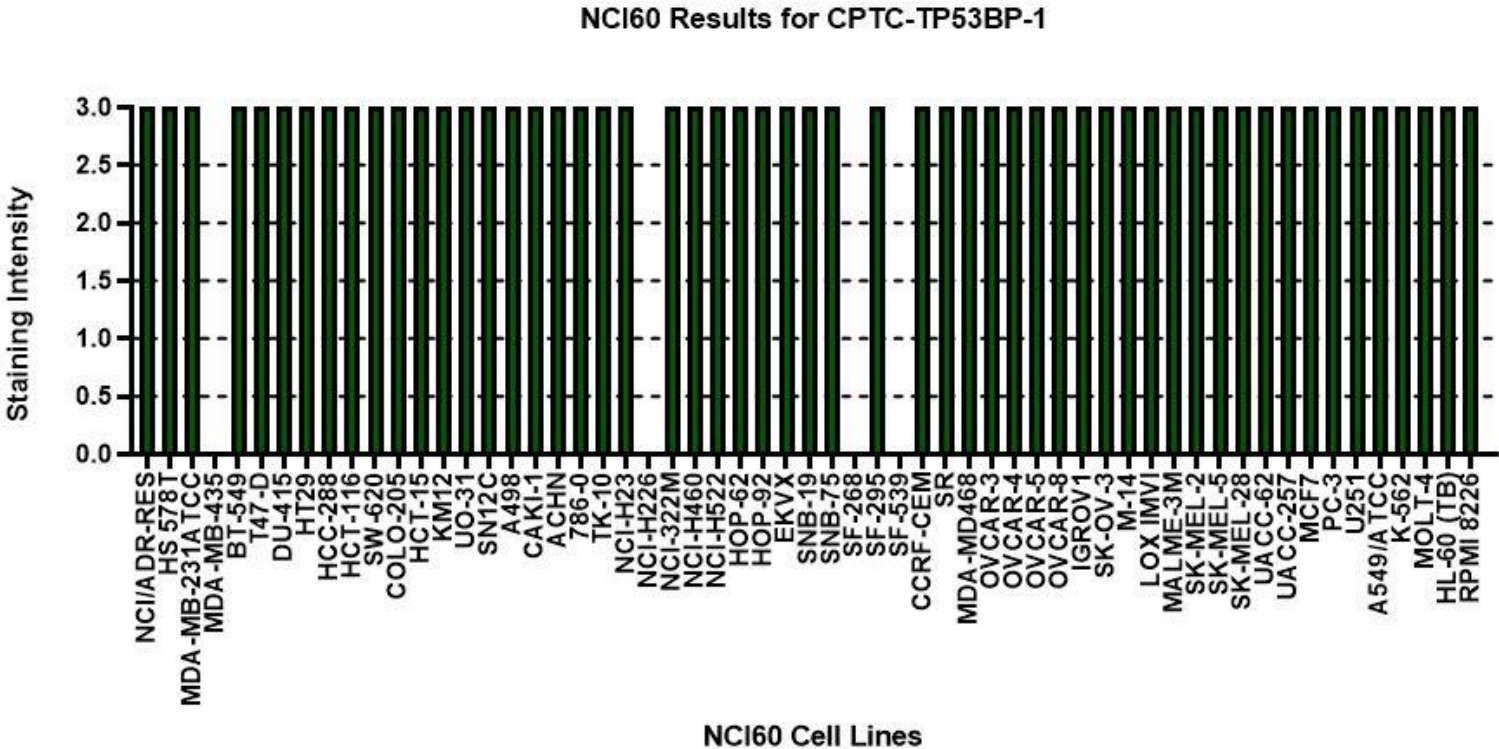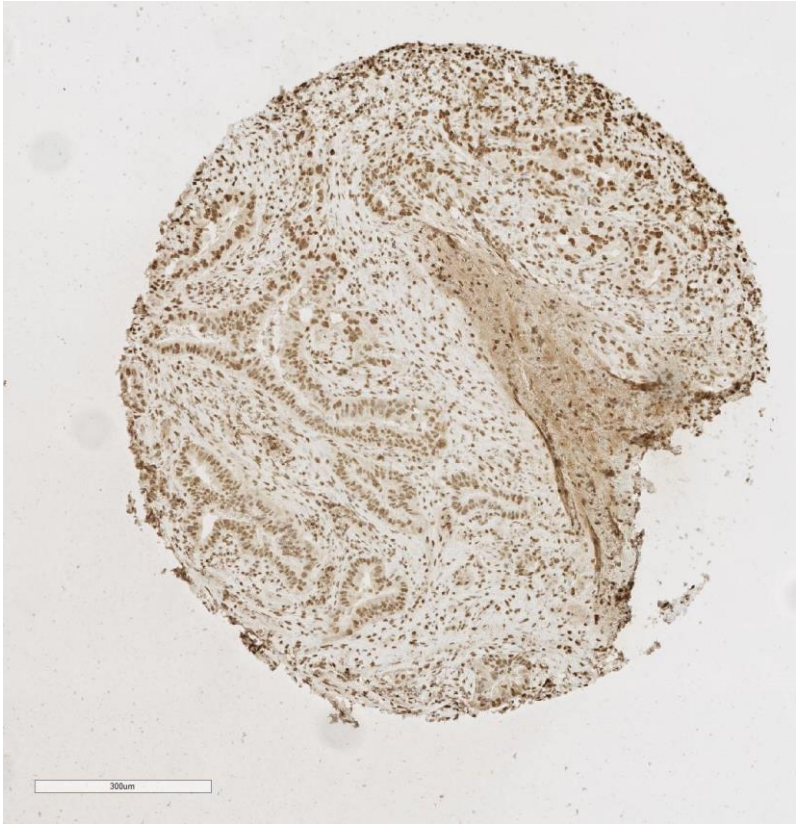

## 38. CPTC-TUBB-1

| Technique | Analyte | Result    |
|-----------|---------|-----------|
| WB        | RecProt | <b>N*</b> |
| Wes       | HeLa    | <b>NT</b> |
|           | MCF10A  | <b>NT</b> |
|           | LCL57   | <b>NT</b> |
| WB        | HeLa    | <b>NT</b> |
|           | MCF10A  | <b>NT</b> |
|           | LCL57   | <b>NT</b> |
| IF        | HeLa    | <b>NT</b> |
|           | MCF10A  | <b>NT</b> |
|           | LCL57   | <b>NT</b> |
| SCWB      | HeLa    | <b>NT</b> |
|           | MCF10A  | <b>NT</b> |
|           | LCL57   | <b>NT</b> |
| IP        | RecProt | <b>NT</b> |
| IP        | HeLa    | <b>NT</b> |
|           | MCF10A  | <b>NT</b> |
|           | LCL57   | <b>NT</b> |
| IHC       |         | <b>N*</b> |
| NCI60     |         | <b>NT</b> |

N – Negative, NT – Not tested, \* Data not shown

39. CPTC-UTP14A-1

| Technique | Analyte | Result |
|-----------|---------|--------|
| WB        | RecProt | N*     |
| West†     | HeLa    | N      |
|           | MCF10A  | U      |
|           | LCL57   | N      |
| WB§       | HeLa    | N      |
|           | MCF10A  | N      |
|           | LCL57   | N      |
| IF        | HeLa    | NT     |
|           | MCF10A  | NT     |
|           | LCL57   | NT     |
| SCWB      | HeLa    | NT     |
|           | MCF10A  | NT     |
|           | LCL57   | NT     |
| IP        | RecProt | NT     |
| IP        | HeLa    | NT     |
|           | MCF10A  | NT     |
|           | LCL57   | NT     |
| IHC       |         | P      |
| NCI60     |         | P      |

U – Uncertain, N – Negative, NT – Not Tested, \* Data not shown

† Data shown are from Phospho-specificity Experiment. § Data from Phospho-specificity Experiment are not shown.

# Endogenous Wes

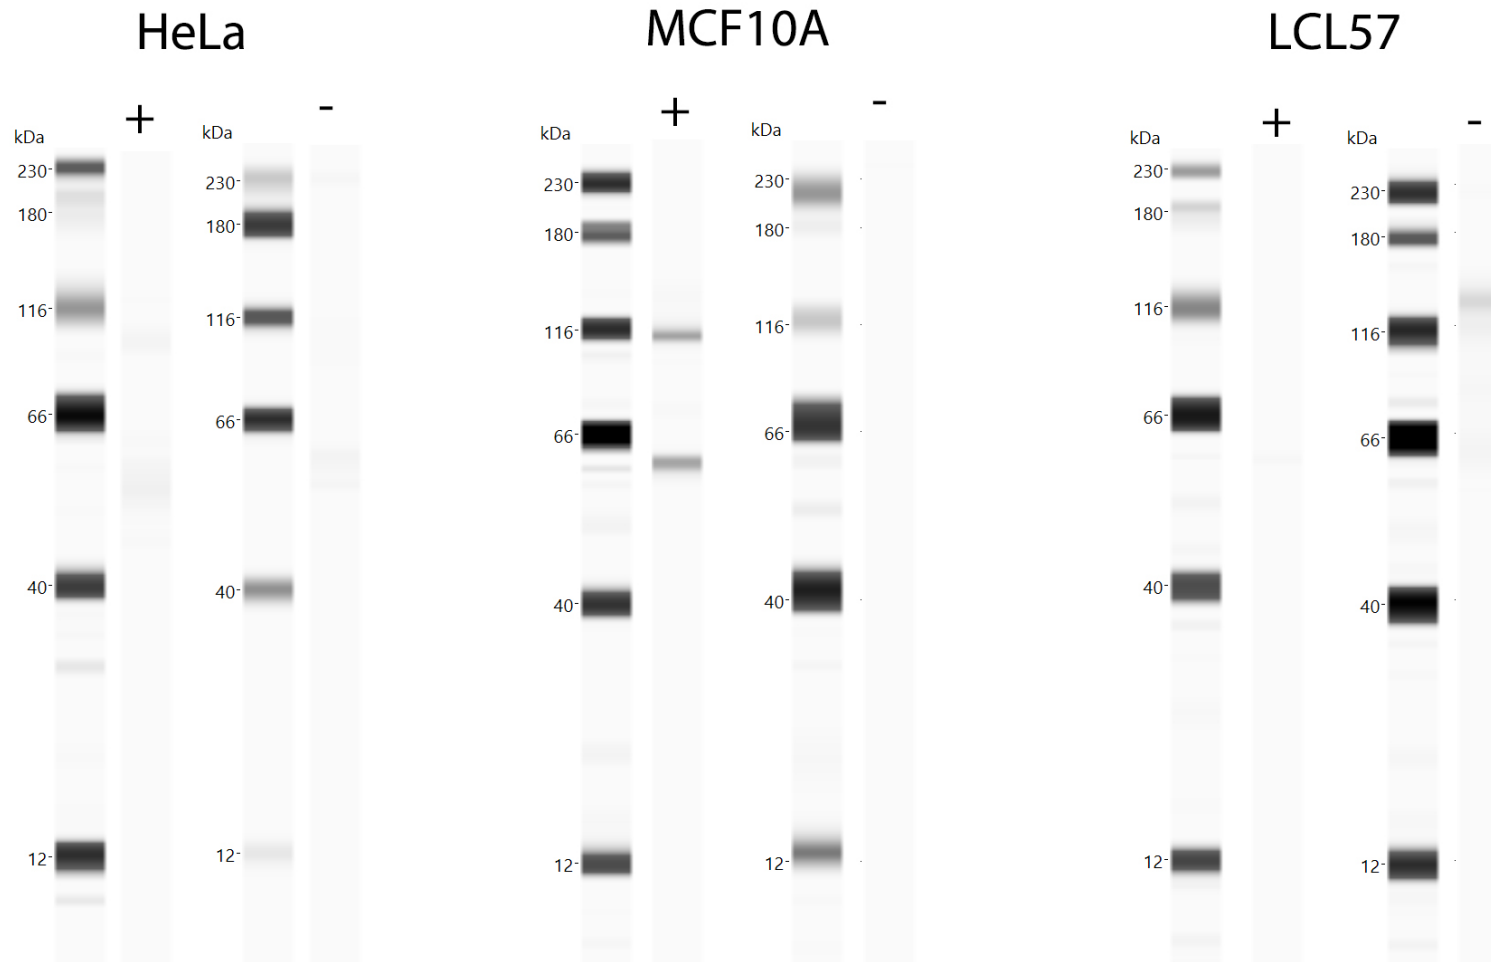

Expected molecular weight: 88, 69, 82 kDa

+ : irradiation treated cells  
- : not treated cells

# CPTC-UTP14A-1

NCI60 Results for CPTC-UTP14A-1

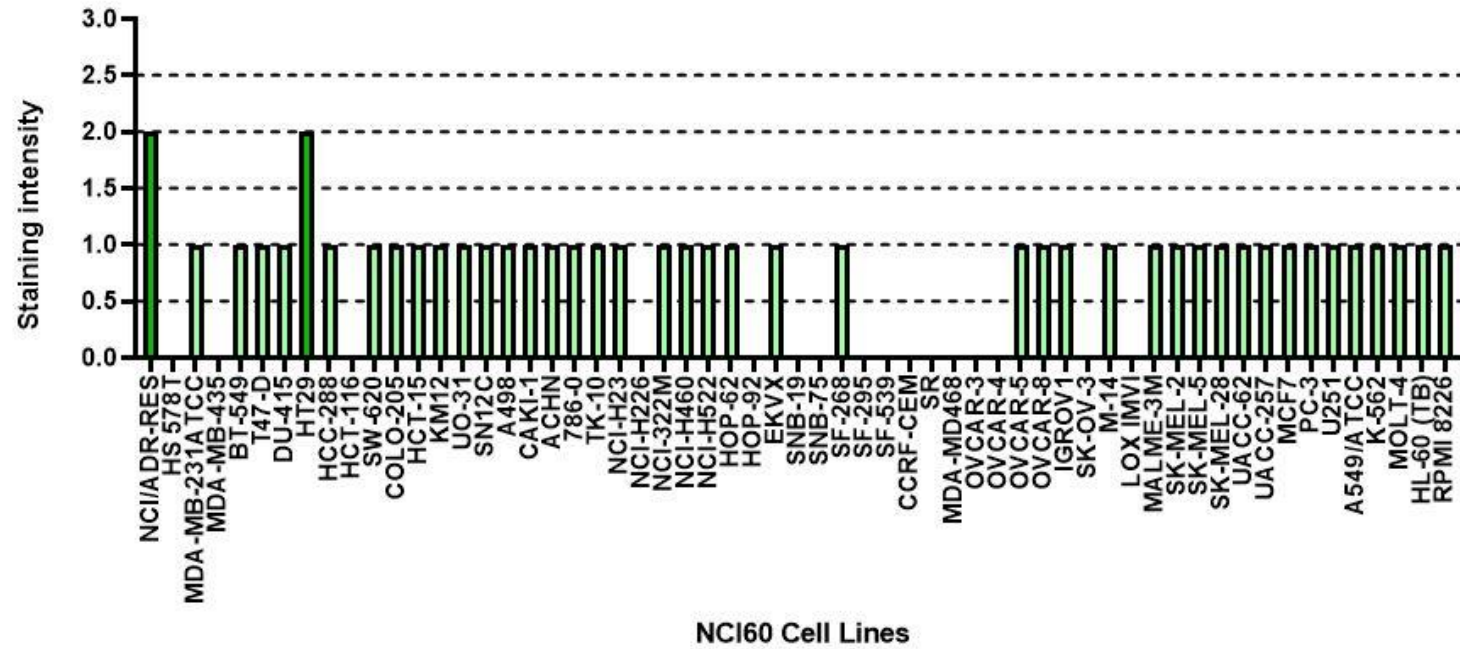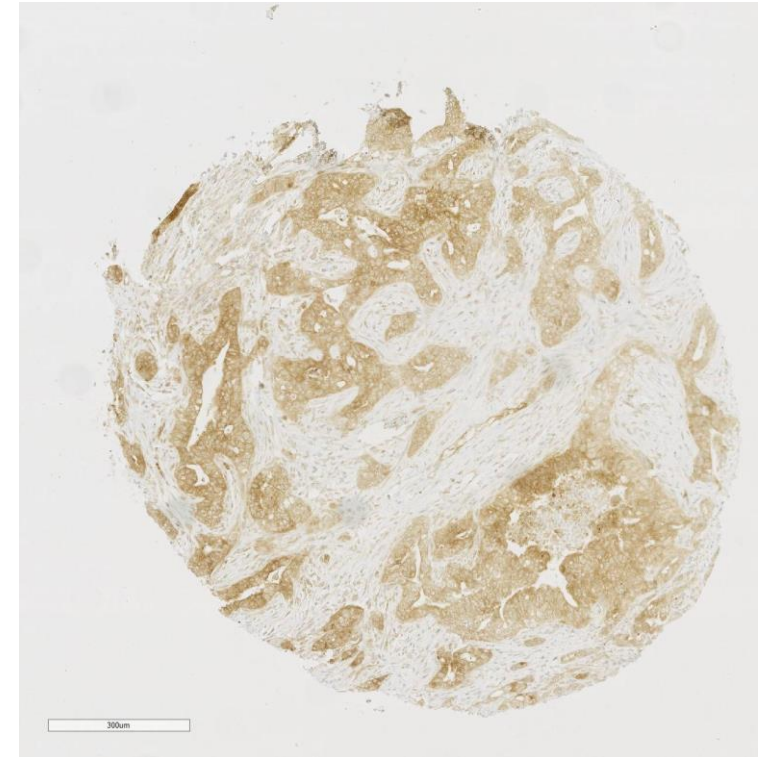

## E. Summary

A panel of 39 rabbit anti-human antibodies were characterized in the Antibody Characterization Laboratory (ACL) at the Frederick National Laboratory for Cancer Research facility in Frederick, Md. A summary of the test results for the primary screen against recombinant protein is seen in Figure 3. The number of individual applications is seen in Figure 4. Figure 5 shows the global performance across all tested applications. One of the 21 clones negative against recombinant protein was shown to have phospho-specificity.

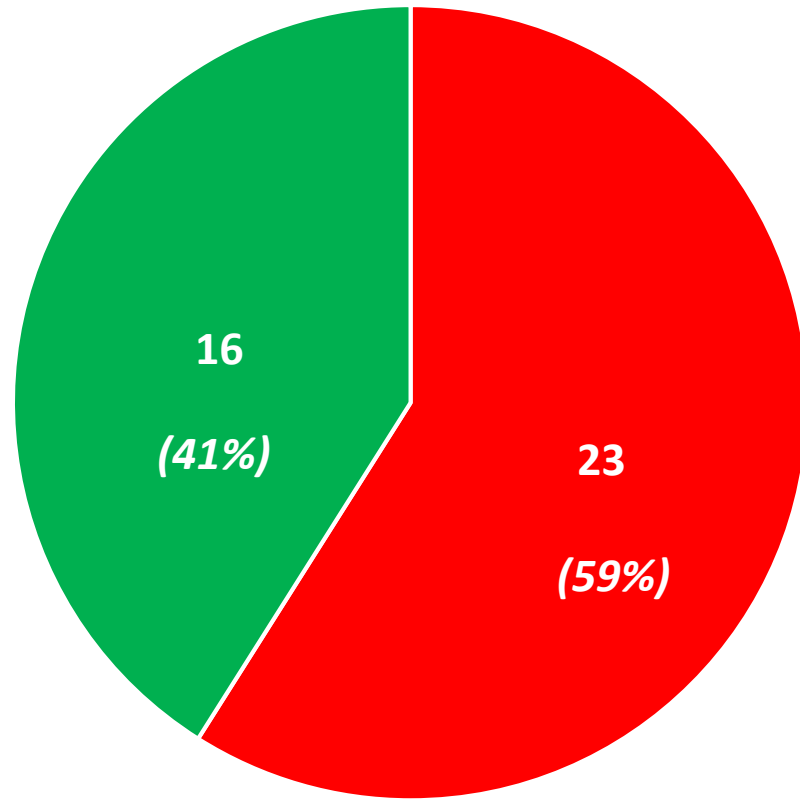

A.

■ Negative ■ Positive

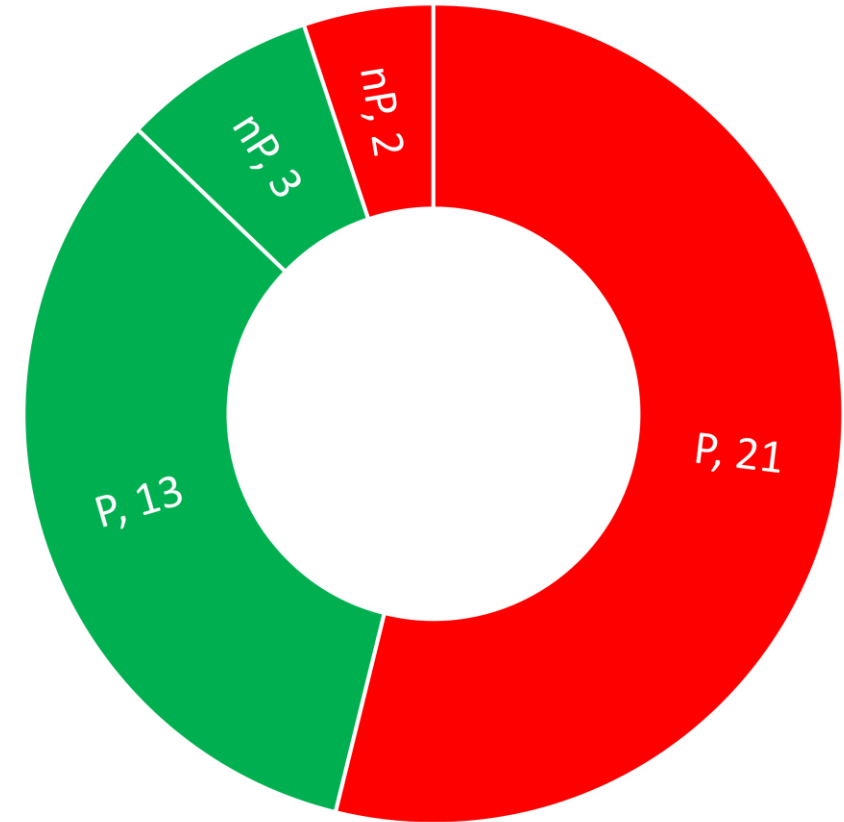

B.

**Figure 3.** Western Blot against Recombinant Protein. Test results for the 39 antibodies that were characterized (A). Test results for antibodies based upon phosphorylation status of target (5 non-phospho-targets (nP) and 34 phospho-targets (P)) (B).



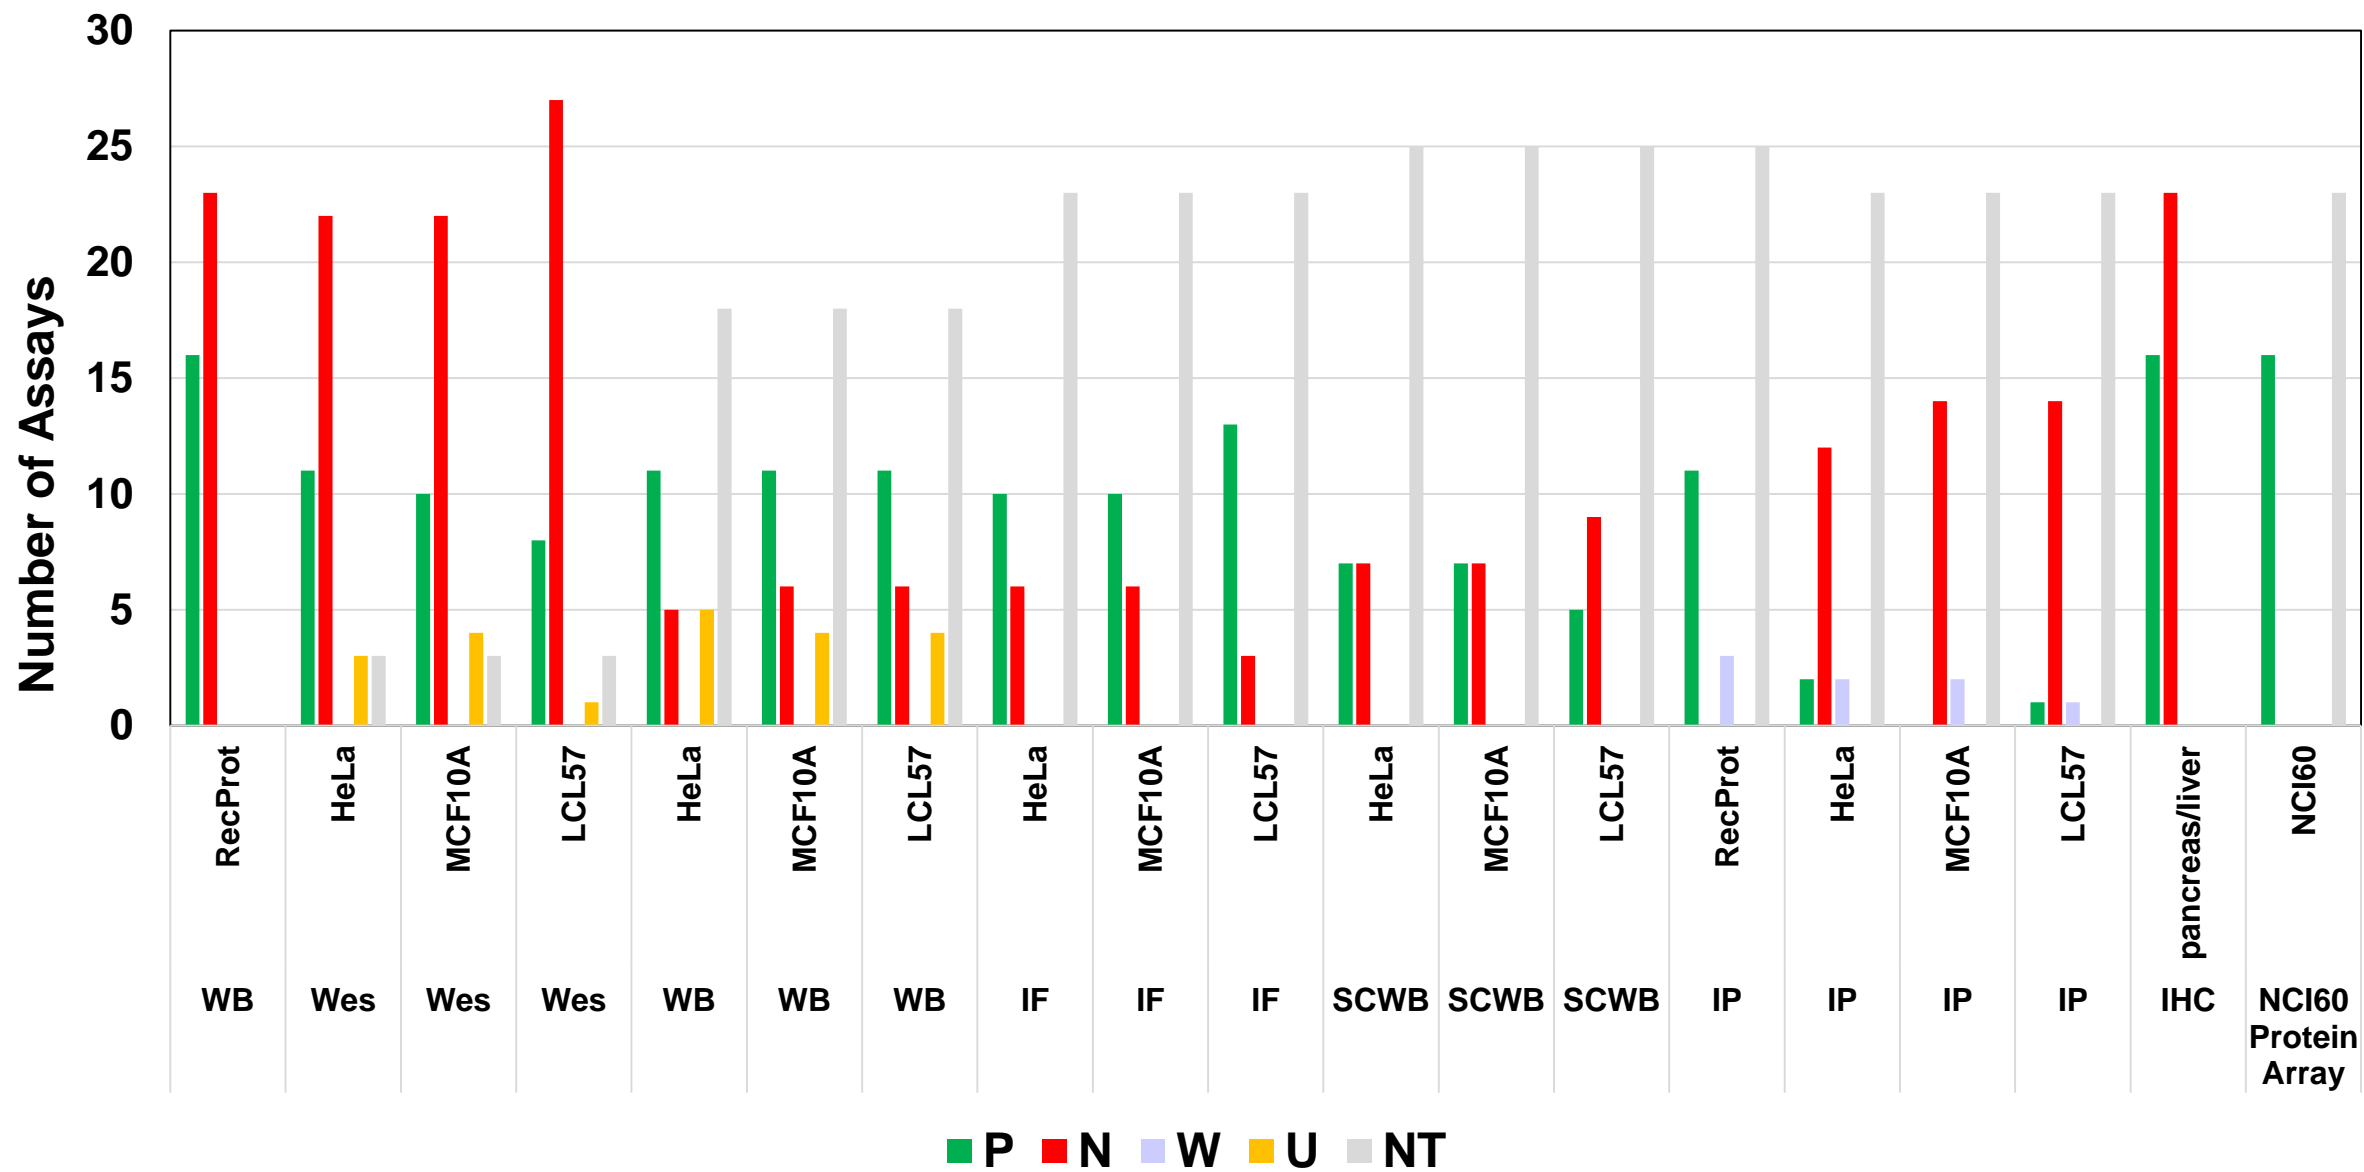

**Figure 4.** Number of individual applications.

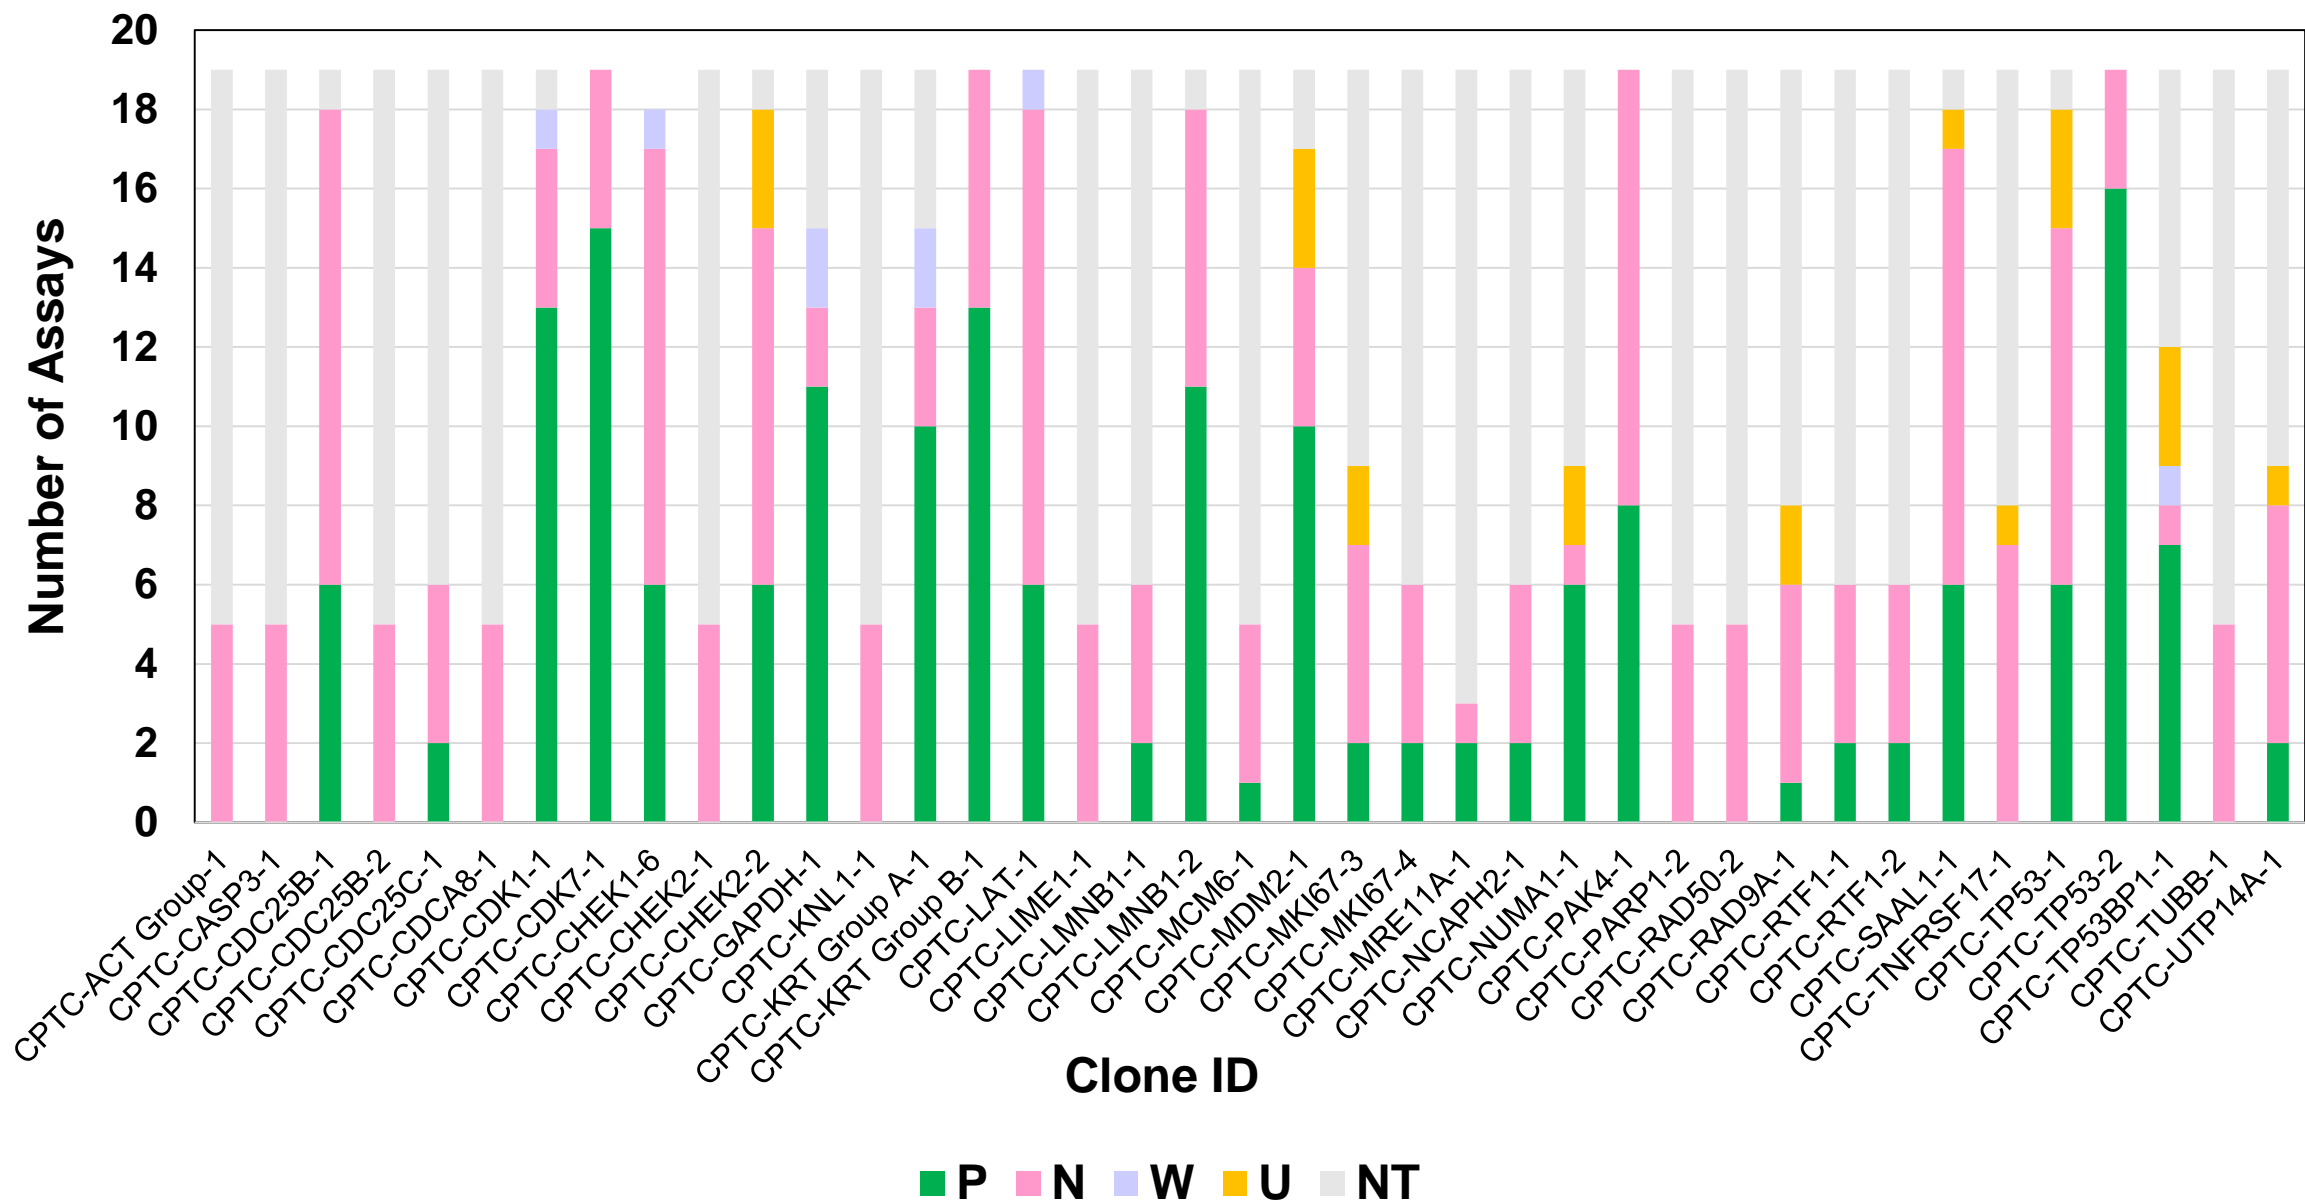

**Figure 5.** Global performance across all tested assays.

## F. References

Whiteaker, J.R., Zhao, L., Saul, R., et al. A Multiplexed Mass Spectrometry-Based Assay for Robust Quantification of Phosphosignaling in Response to DNA Damage. *Radiation Research*. 2018;189(5):505-518.
